# Supplementary material for: Genome Analysis of the Domestic Dog (Korean Jindo) by Massively Parallel Sequencing
Source: PubMed Central journal article supplement — DNA Res. 2012 Apr 3;19(3):275–88. doi: 10.1093/dnares/dss011 (PMC3372376; doi:10.1093/dnares/dss011), 2012-04-03

**Supplementary Figure 1. Relationship between read depth coverage and GC content throughout dog genome.**

**A**

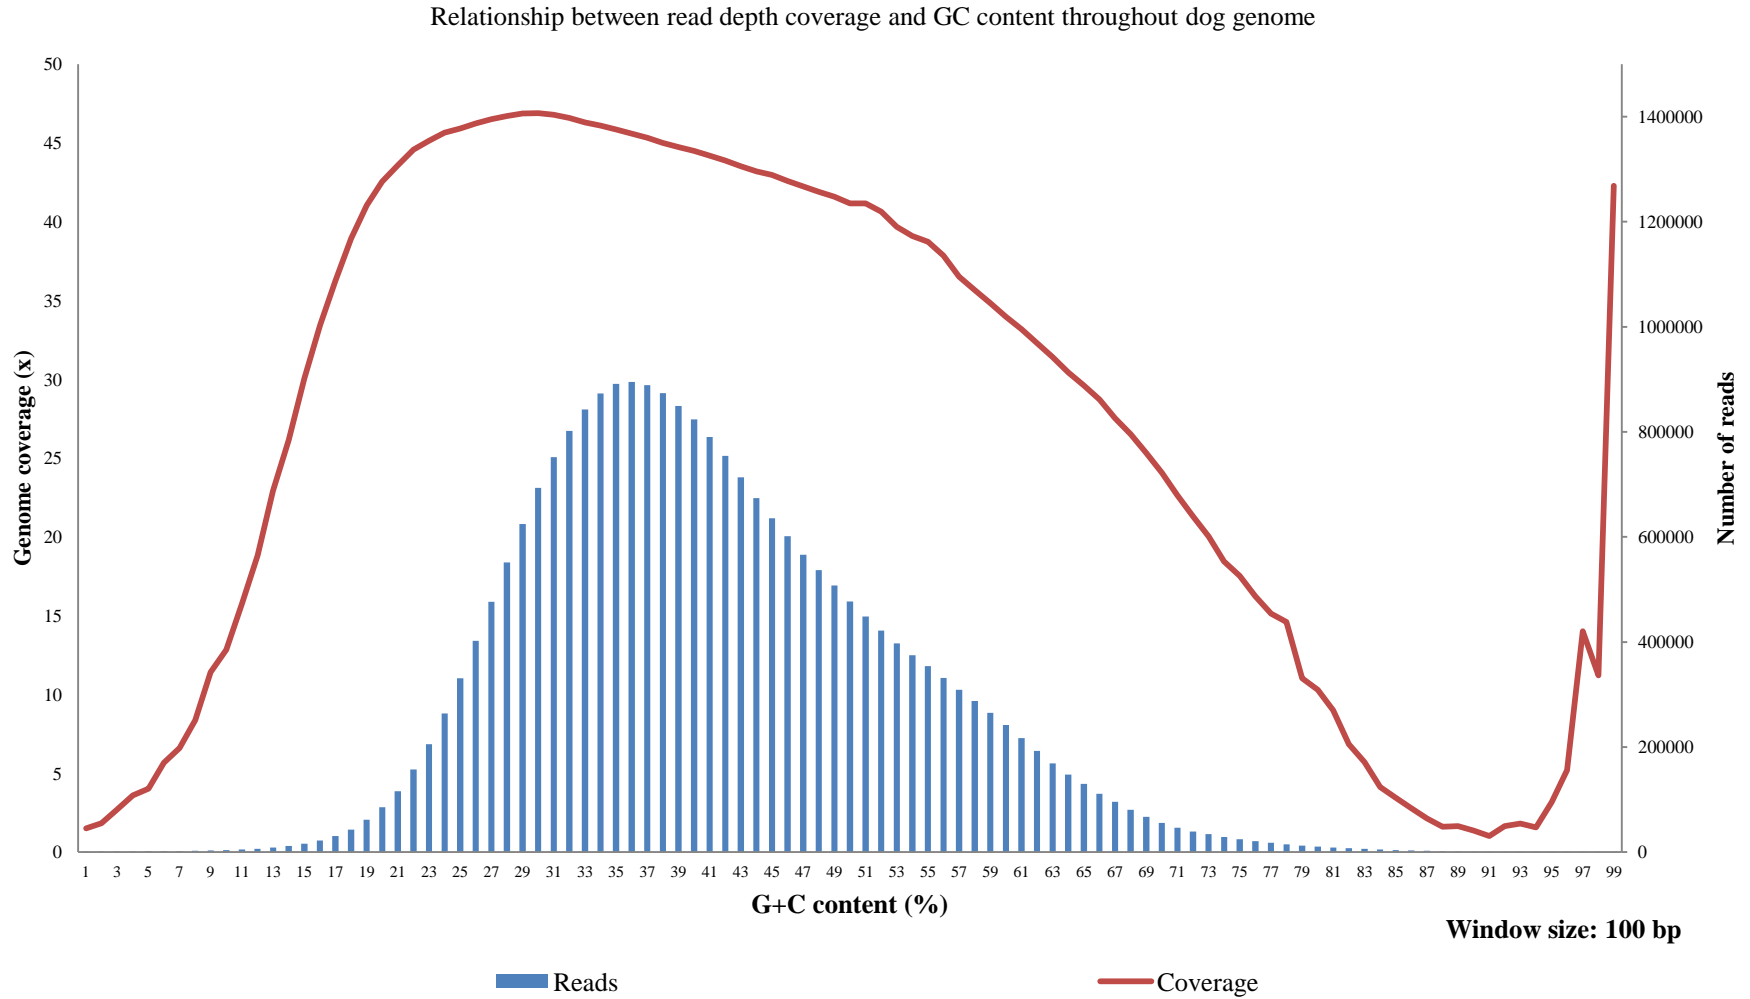

**B**

Relationship between read depth coverage and GC content throughout dog chromosome 1

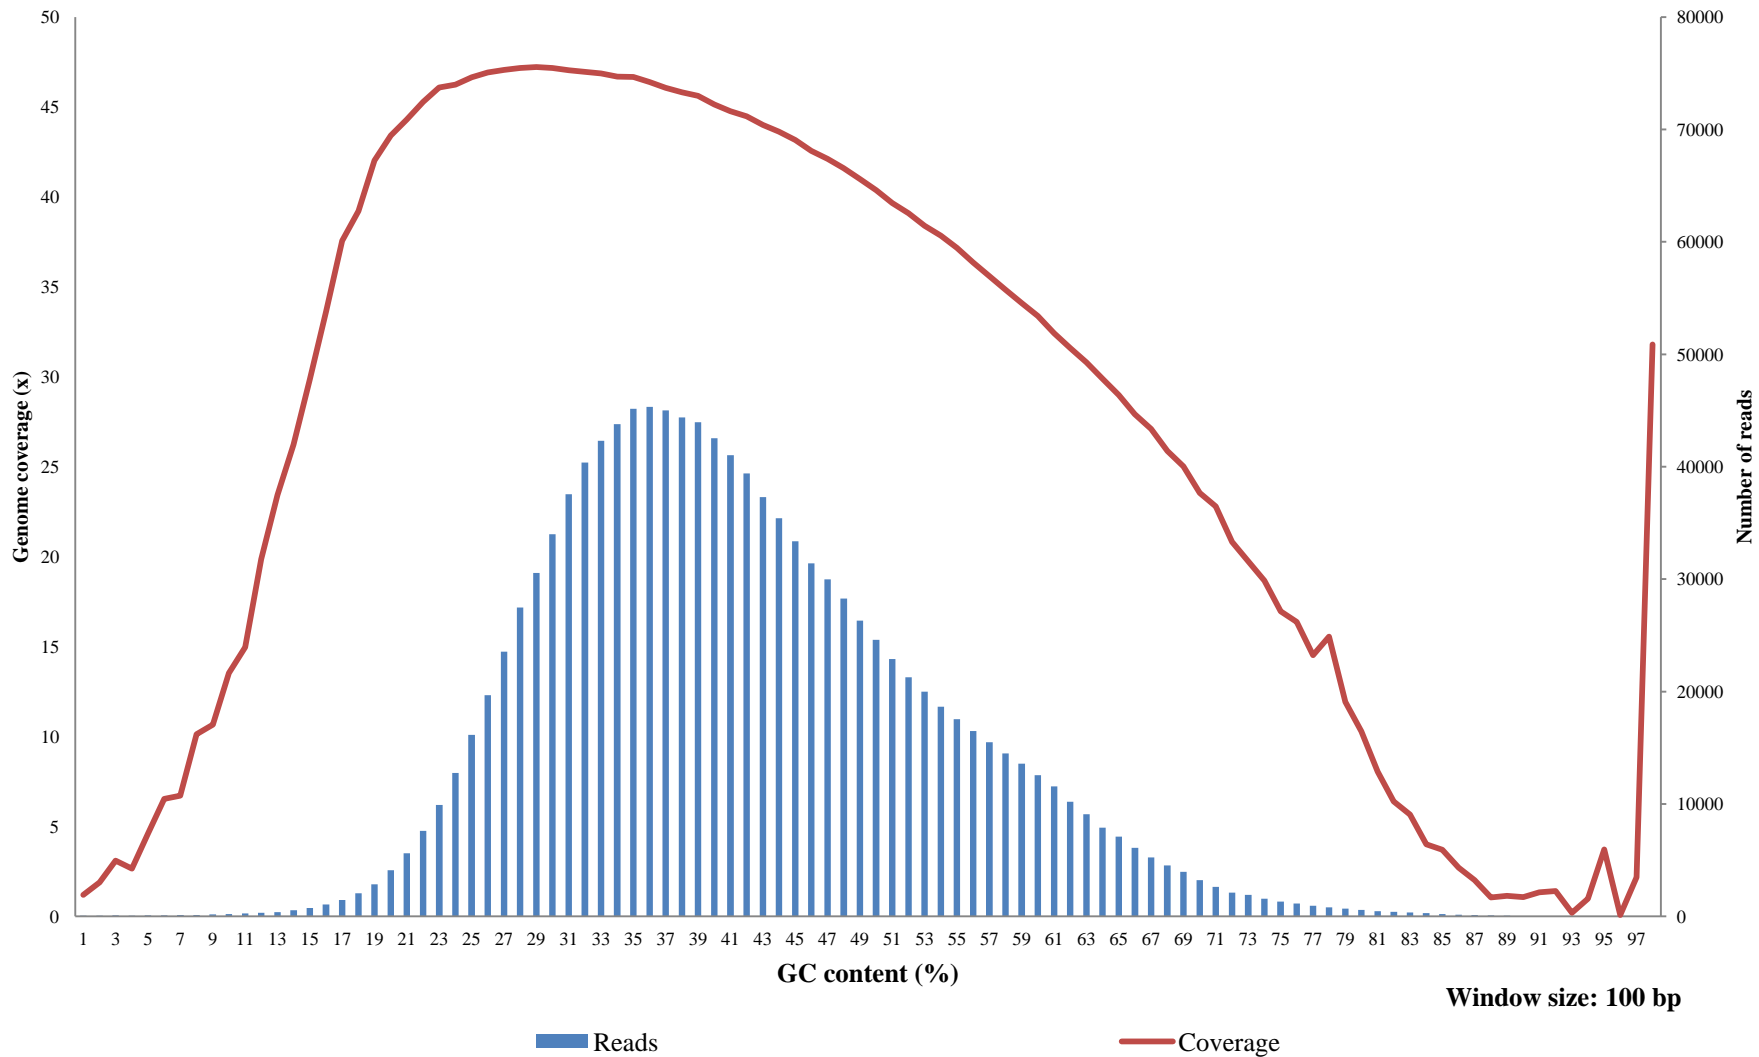

Supplement: supp_dss011_dss011supp_fig1.pdf [file supp_dss011_dss011supp_fig1.pdf]
