# Supplementary material for: Genome Analysis of the Domestic Dog (Korean Jindo) by Massively Parallel Sequencing
Source: PubMed Central journal article supplement — DNA Res. 2012 Apr 3;19(3):275–88. doi: 10.1093/dnares/dss011 (PMC3372376; doi:10.1093/dnares/dss011), 2012-04-03

**Supplementary Figure 2. Detection of genomic sequence variations within *TCOF1* gene locus in Jindo dog genome by genomic PCR.**

**A**

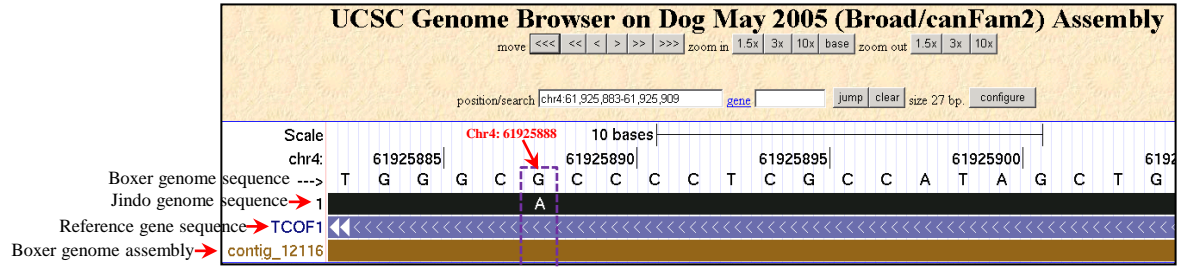

Capillary-based Sanger sequencing chromatogram of genomic PCR-amplified sequence of the SNP-harboring region in Jindo dog genome

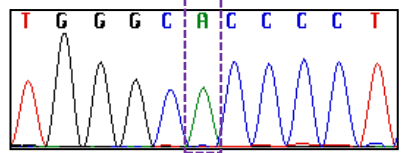

← A G at nucleotide 61925888 in boxer chromosome 4 is changed to an A in the Jindo genome.

**B**

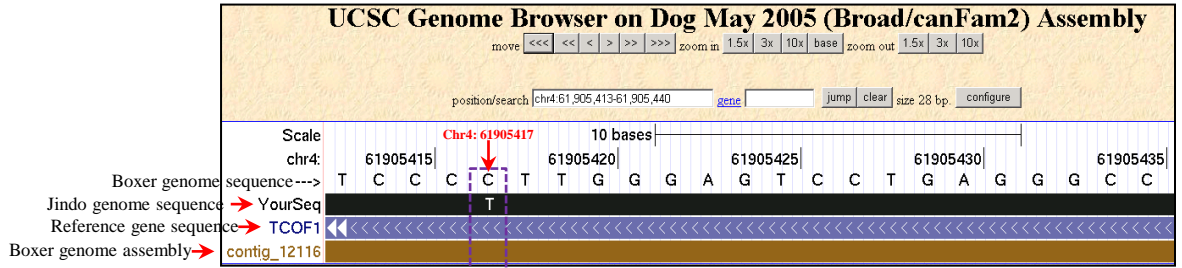

Capillary-based Sanger sequencing chromatogram of genomic PCR-amplified sequence of the SNP-harboring region in Jindo dog genome

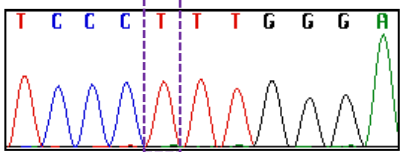

← A C at nucleotide 61905417 in boxer chromosome 4 is changed to a T in the Jindo genome.

C

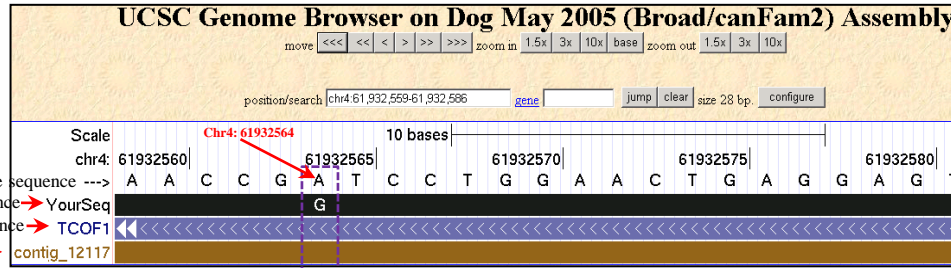

Capillary-based Sanger sequencing chromatogram of genomic PCR-amplified sequence of the SNP-harboring region in Jindo dog genome

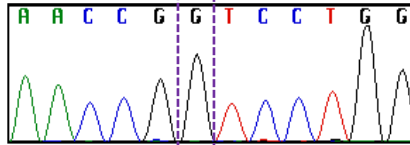

← An A at nucleotide 61932564 in boxer chromosome 4 is changed to a G in the Jindo genome.

**D**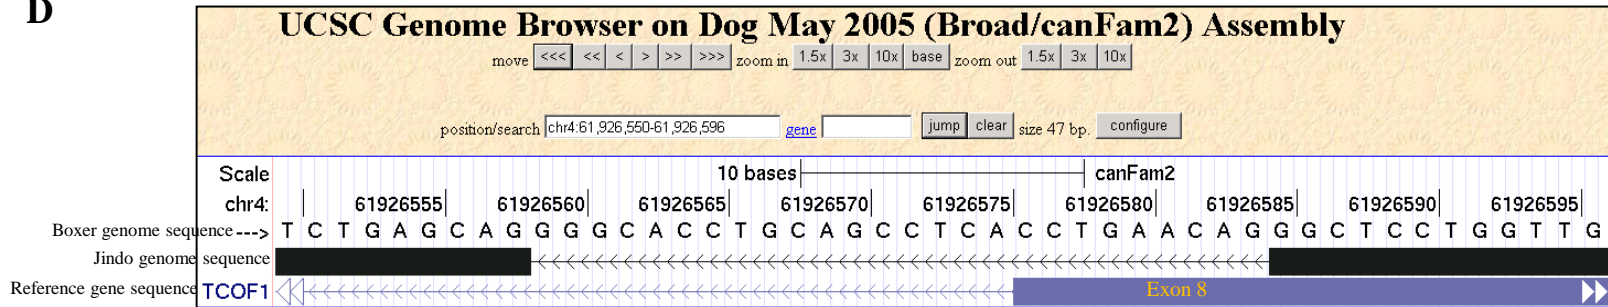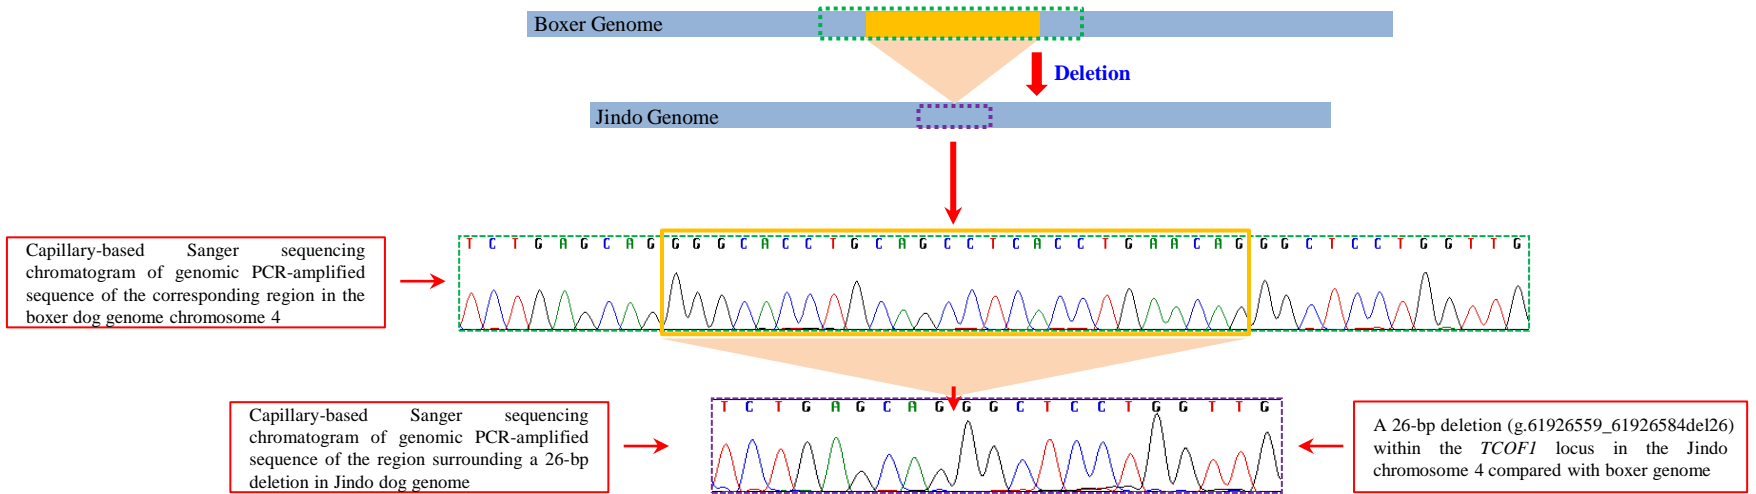

Supplement: supp_dss011_dss011supp_fig2.pdf [file supp_dss011_dss011supp_fig2.pdf]
