# Supplementary material for: Genome Analysis of the Domestic Dog (Korean Jindo) by Massively Parallel Sequencing
Source: PubMed Central journal article supplement — DNA Res. 2012 Apr 3;19(3):275–88. doi: 10.1093/dnares/dss011 (PMC3372376; doi:10.1093/dnares/dss011), 2012-04-03

**Supplementary Figure 3. Mediation of genomic structural deletion variation by the retrotransposable element SINE.** The retrotransposable element SINEC\_Cf in the boxer genomic region (Chr26:36591555-36592244) might be associated with a structural deletion variation in the corresponding Jindo dog genomic region.

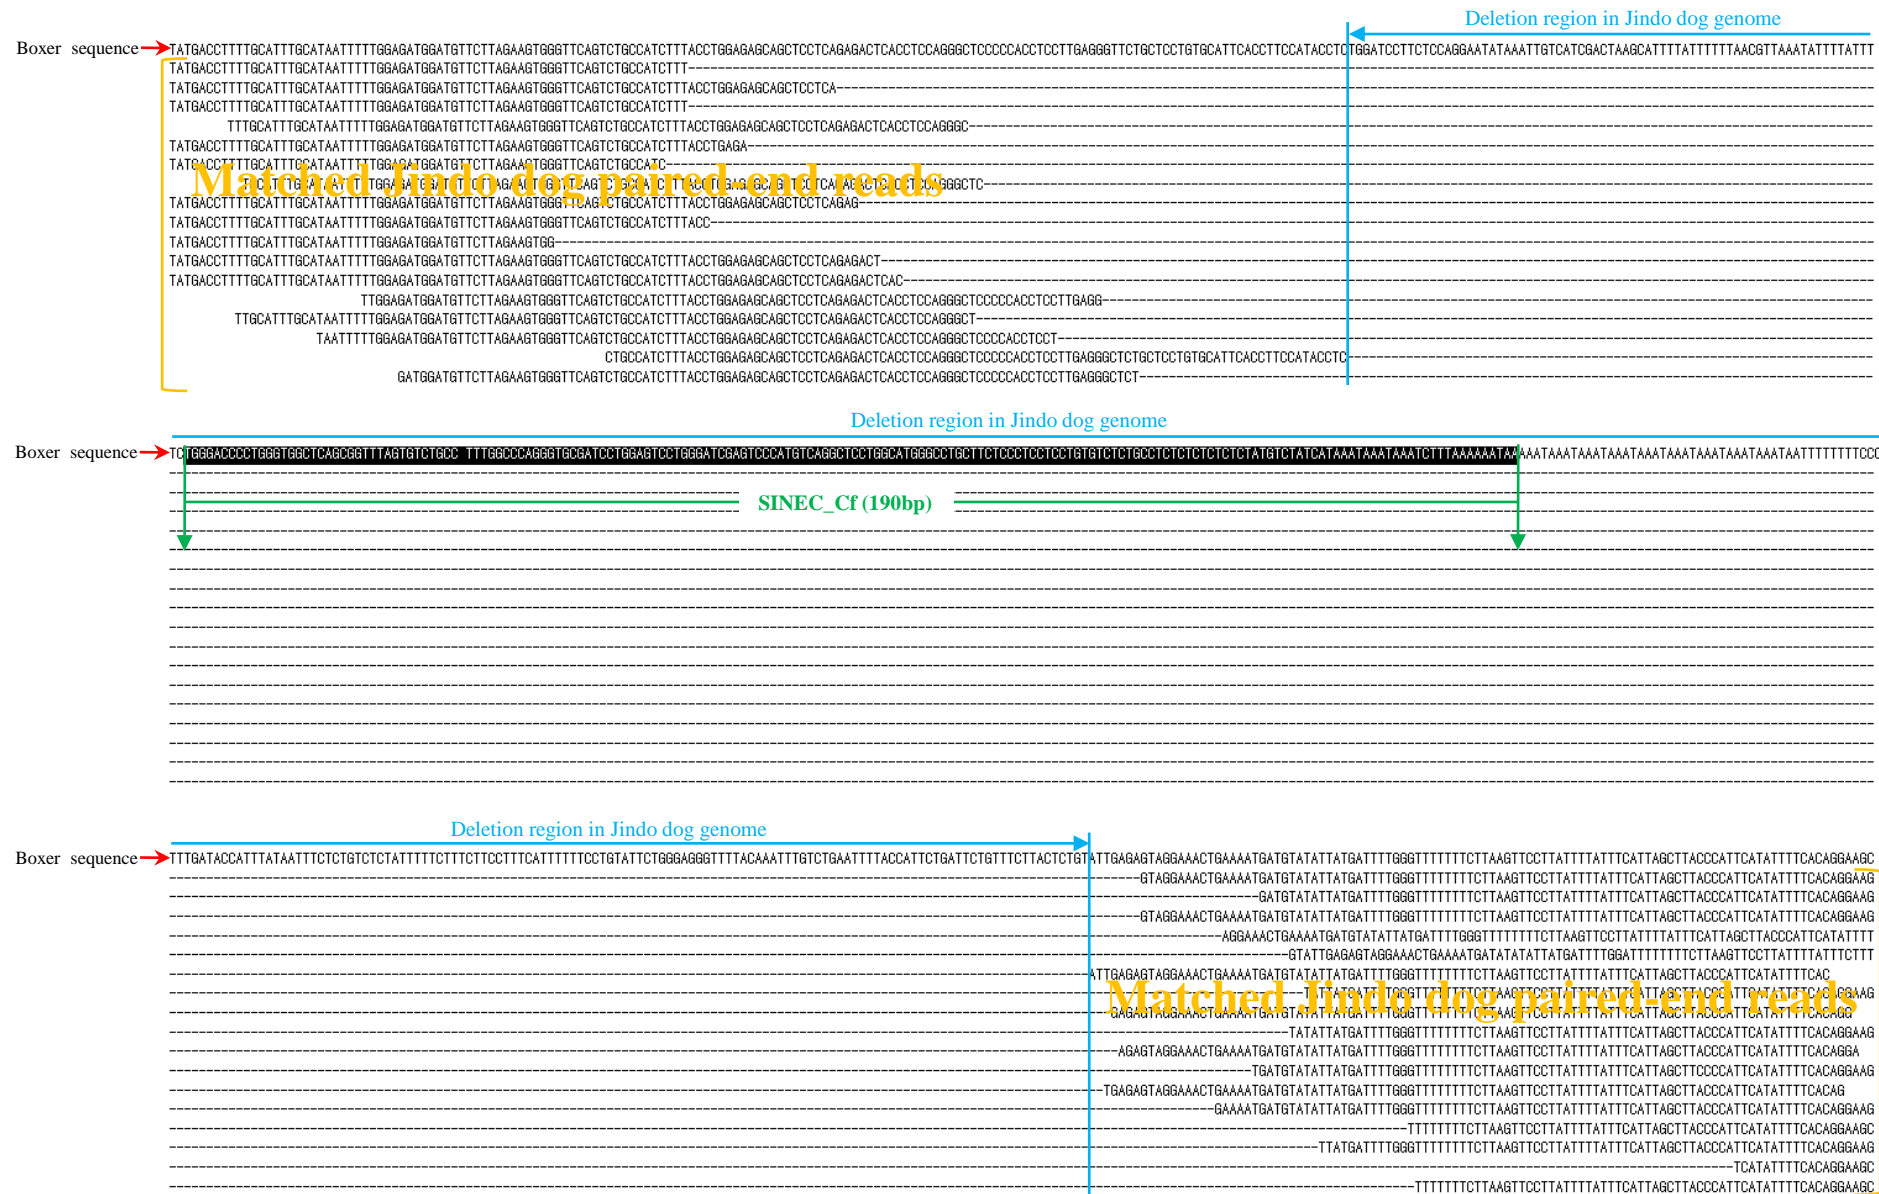

Supplement: supp_dss011_dss011supp_fig3.pdf [file supp_dss011_dss011supp_fig3.pdf]
