# Supplementary material for: Genome Analysis of the Domestic Dog (Korean Jindo) by Massively Parallel Sequencing
Source: PubMed Central journal article supplement — DNA Res. 2012 Apr 3;19(3):275–88. doi: 10.1093/dnares/dss011 (PMC3372376; doi:10.1093/dnares/dss011), 2012-04-03
Supplement: supp_dss011_dss011supp_table3.pdf [file supp_dss011_dss011supp_table3.pdf]

Supplementary Table 3. 734 contigs (derived from unmapped reads) were matched to the NR-protein database

| rank | contig_id                        | pscore      | query_length | target_length | target_accession |
|------|----------------------------------|-------------|--------------|---------------|------------------|
| 1    | 60550 length 401 cvg_3.0_tip_1   | 2.33216E-14 | 401          | 1356          | 45478104         |
| 1    | 66954 length 579 cvg_9.0_tip_1   | 2.76586E-09 | 579          | 1260          | 126296           |
| 1    | 68292 length 644 cvg_6.0_tip_1   | 1.67915E-12 | 644          | 809           | 21411215         |
| 1    | 60584 length 401 cvg_6.0_tip_1   | 2.38519E-07 | 401          | 1272          | 66734174         |
| 1    | 65484 length 525 cvg_8.9_tip_1   | 1.1565E-11  | 525          | 1079          | 74006100         |
| 1    | 58702 length 370 cvg_8.0_tip_1   | 4.59E-43    | 370          | 132           | 2826657          |
| 1    | 59162 length 378 cvg_7.0_tip_1   | 1.76E-26    | 378          | 227           | 283096349        |
| 1    | 71426 length 953 cvg_19.0_tip_1  | 1.10E-93    | 953          | 220           | 8928377          |
| 1    | 62614 length 443 cvg_6.0_tip_1   | 2.47E-20    | 443          | 723           | 291407239        |
| 1    | 69622 length 737 cvg_9.0_tip_1   | 6.15083E-10 | 737          | 4843          | 301780954        |
| 1    | 72062 length 1081 cvg_11.0_tip_1 | 1.51527E-12 | 1081         | 671           | 15824346         |
| 1    | 56470 length 336 cvg_10.0_tip_1  | 5.57E-25    | 336          | 468           | 17066524         |
| 1    | 66180 length 548 cvg_7.0_tip_1   | 3.83439E-10 | 548          | 1339          | 73946349         |
| 1    | 60580 length 401 cvg_8.3_tip_1   | 4.12E-19    | 401          | 416           | 74011368         |
| 1    | 66760 length 572 cvg_5.0_tip_1   | 6.12786E-12 | 572          | 1159          | 74003681         |
| 1    | 72160 length 1104 cvg_9.0_tip_1  | 5.35E-29    | 1104         | 135           | 326934106        |
| 1    | 73696 length 2880 cvg_9.0_tip_1  | 1.81939E-13 | 2880         | 700           | 270013850        |
| 1    | 59926 length 390 cvg_7.0_tip_1   | 4.72581E-08 | 390          | 562           | 364964           |
| 1    | 66742 length 571 cvg_4.0_tip_1   | 1.46E-16    | 571          | 1031          | 73979343         |
| 1    | 67648 length 611 cvg_9.0_tip_1   | 6.86951E-10 | 611          | 472           | 301764723        |
| 1    | 71462 length 958 cvg_5.0_tip_1   | 5.4735E-08  | 958          | 491           | 327268317        |
| 1    | 69170 length 702 cvg_8.0_tip_1   | 6.02E-30    | 702          | 609           | 73964634         |
| 1    | 67882 length 621 cvg_6.0_tip_1   | 1.30482E-11 | 621          | 473           | 242020244        |
| 1    | 71848 length 1028 cvg_5.0_tip_1  | 2.82E-21    | 1028         | 344           | 123270417        |
| 1    | 63292 length 460 cvg_5.0_tip_1   | 5.56098E-09 | 460          | 123           | 296315065        |
| 1    | 56096 length 331 cvg_5.0_tip_1   | 2.51998E-09 | 331          | 2519          | 311276164        |
| 1    | 61238 length 413 cvg_4.0_tip_1   | 6.59682E-10 | 413          | 1846          | 47220139         |
| 1    | 61556 length 420 cvg_5.0_tip_1   | 2.72E-27    | 420          | 2552          | 224458400        |
| 1    | 67412 length 599 cvg_5.0_tip_1   | 1.10E-53    | 599          | 2552          | 224458400        |
| 1    | 71638 length 992 cvg_5.0_tip_1   | 4.8545E-15  | 992          | 2571          | 326913484        |
| 1    | 71996 length 1063 cvg_5.0_tip_1  | 8.14E-71    | 1063         | 1272          | 66734174         |
| 1    | 64606 length 498 cvg_8.0_tip_1   | 1.07E-52    | 498          | 972           | 74010171         |
| 1    | 66028 length 543 cvg_8.0_tip_1   | 2.08E-69    | 543          | 261           | 294774368        |
| 1    | 60972 length 409 cvg_9.0_tip_1   | 9.06E-19    | 409          | 261           | 189493093        |
| 1    | 63756 length 473 cvg_10.0_tip_1  | 2.06E-27    | 473          | 104           | 320118989        |
| 1    | 69212 length 705 cvg_11.0_tip_0  | 4.09E-32    | 705          | 226           | 262399669        |
| 1    | 69294 length 710 cvg_9.5_tip_0   | 8.38E-30    | 710          | 226           | 262399669        |
| 1    | 56190 length 333 cvg_4.0_tip_1   | 2.68222E-11 | 333          | 227           | 294774435        |
| 1    | 57208 length 347 cvg_5.7_tip_0   | 1.18E-18    | 347          | 459           | 15079212         |
| 1    | 62382 length 438 cvg_4.9_tip_1   | 6.99E-20    | 438          | 118           | 148292222        |
| 1    | 70990 length 892 cvg_9.0_tip_1   | 6.34E-69    | 892          | 230           | 254028457        |
| 1    | 54000 length 306 cvg_8.0_tip_1   | 2.78052E-08 | 306          | 654           | 73984574         |
| 1    | 67318 length 596 cvg_5.8_tip_1   | 7.99E-35    | 596          | 484           | 21622589         |
| 1    | 56578 length 338 cvg_8.6_tip_1   | 1.41685E-12 | 338          | 3404          | 83317874         |
| 1    | 59442 length 382 cvg_9.0_tip_1   | 1.34E-18    | 382          | 3404          | 83317874         |
| 1    | 65082 length 512 cvg_6.9_tip_1   | 1.42311E-10 | 512          | 3404          | 83317874         |

|   |                                  |             |      |      |           |
|---|----------------------------------|-------------|------|------|-----------|
| 1 | 73208 length 1591 cvg_7.0_tip_1  | 2.05E-33    | 1591 | 717  | 325085610 |
| 1 | 73284 length 1692 cvg_7.0_tip_1  | 1.11251E-08 | 1692 | 3404 | 83317874  |
| 1 | 73768 length 4188 cvg_7.8_tip_1  | 2.50E-21    | 4188 | 3404 | 83317874  |
| 1 | 57488 length 351 cvg_6.0_tip_1   | 7.67704E-06 | 351  | 301  | 73991115  |
| 1 | 70040 length 772 cvg_8.0_tip_1   | 4.36447E-09 | 772  | 712  | 73966616  |
| 1 | 64476 length 494 cvg_7.2_tip_1   | 1.93479E-09 | 494  | 654  | 73984574  |
| 1 | 66800 length 573 cvg_5.0_tip_1   | 2.32858E-11 | 573  | 183  | 297250762 |
| 1 | 61314 length 415 cvg_49.0_tip_1  | 1.36918E-15 | 415  | 774  | 73945978  |
| 1 | 61790 length 425 cvg_7.0_tip_1   | 1.39722E-07 | 425  | 754  | 73988965  |
| 1 | 60876 length 407 cvg_7.0_tip_1   | 1.63833E-08 | 407  | 224  | 119589289 |
| 1 | 67946 length 624 cvg_5.0_tip_1   | 1.39563E-12 | 624  | 314  | 281348240 |
| 1 | 72682 length 1261 cvg_44.1_tip_1 | 3.49291E-06 | 1261 | 607  | 194207280 |
| 1 | 72898 length 1381 cvg_7.0_tip_1  | 7.16E-24    | 1381 | 3404 | 83317874  |
| 1 | 64584 length 497 cvg_8.0_tip_1   | 9.57583E-06 | 497  | 1323 | 194227929 |
| 1 | 61680 length 423 cvg_4.0_tip_1   | 8.21E-16    | 423  | 489  | 50979184  |
| 1 | 66066 length 544 cvg_6.0_tip_1   | 1.35336E-15 | 544  | 489  | 50979184  |
| 1 | 55326 length 321 cvg_7.4_tip_1   | 6.27715E-08 | 321  | 166  | 345543    |
| 1 | 61334 length 415 cvg_6.5_tip_1   | 9.52579E-09 | 415  | 38   | 297302964 |
| 1 | 54848 length 316 cvg_6.0_tip_1   | 1.23577E-08 | 316  | 166  | 345543    |
| 1 | 62432 length 439 cvg_4.0_tip_1   | 1.71E-34    | 439  | 318  | 189492219 |
| 1 | 66988 length 581 cvg_7.0_tip_1   | 6.56E-65    | 581  | 318  | 148298632 |
| 1 | 67638 length 610 cvg_10.0_tip_1  | 5.59052E-10 | 610  | 166  | 345543    |
| 1 | 58590 length 368 cvg_8.0_tip_1   | 2.31E-39    | 368  | 379  | 262399704 |
| 1 | 59326 length 381 cvg_5.0_tip_1   | 7.16E-34    | 381  | 125  | 12622083  |
| 1 | 61944 length 428 cvg_9.0_tip_1   | 2.58E-62    | 428  | 379  | 254028466 |
| 1 | 64022 length 480 cvg_7.0_tip_1   | 1.18E-29    | 480  | 1402 | 74011366  |
| 1 | 54300 length 309 cvg_6.0_tip_1   | 2.42E-20    | 309  | 606  | 255761436 |
| 1 | 60220 length 395 cvg_7.9_tip_1   | 1.83E-31    | 395  | 514  | 317097271 |
| 1 | 60206 length 395 cvg_5.9_tip_1   | 8.79E-26    | 395  | 261  | 189493093 |
| 1 | 57260 length 348 cvg_12.0_tip_0  | 3.16E-34    | 348  | 459  | 115494575 |
| 1 | 62532 length 441 cvg_9.3_tip_1   | 8.53E-26    | 441  | 288  | 118136415 |
| 1 | 68302 length 644 cvg_12.0_tip_1  | 1.90E-40    | 644  | 347  | 90110749  |
| 1 | 71534 length 970 cvg_8.0_tip_1   | 6.53E-17    | 970  | 3404 | 83317874  |
| 1 | 71784 length 1019 cvg_8.0_tip_1  | 9.58658E-14 | 1019 | 3404 | 83317874  |
| 1 | 71928 length 1048 cvg_5.9_tip_1  | 4.31E-25    | 1048 | 589  | 325074608 |
| 1 | 53968 length 306 cvg_9.0_tip_1   | 1.61E-32    | 306  | 459  | 207559990 |
| 1 | 68562 length 662 cvg_16.4_tip_1  | 5.32E-50    | 662  | 852  | 114595784 |
| 1 | 55260 length 320 cvg_5.0_tip_1   | 4.47E-38    | 320  | 1275 | 2981631   |
| 1 | 59564 length 385 cvg_6.0_tip_1   | 1.17E-18    | 385  | 321  | 74008335  |
| 1 | 53724 length 303 cvg_4.0_tip_1   | 1.53131E-06 | 303  | 455  | 301783067 |
| 1 | 53994 length 306 cvg_6.6_tip_1   | 9.52154E-09 | 306  | 812  | 74007908  |
| 1 | 59680 length 386 cvg_5.0_tip_1   | 2.60359E-06 | 386  | 942  | 194211262 |
| 1 | 65848 length 537 cvg_6.0_tip_1   | 2.46946E-06 | 537  | 1377 | 74007490  |
| 1 | 66990 length 581 cvg_5.0_tip_1   | 6.89593E-06 | 581  | 718  | 74007494  |
| 1 | 73272 length 1679 cvg_6.6_tip_1  | 4.31E-21    | 1679 | 3404 | 83317874  |
| 1 | 73306 length 1723 cvg_8.0_tip_1  | 3.30E-32    | 1723 | 717  | 325085610 |
| 1 | 73570 length 2229 cvg_6.5_tip_1  | 6.49E-31    | 2229 | 717  | 325085610 |
| 1 | 68646 length 668 cvg_6.0_tip_1   | 1.03095E-07 | 668  | 77   | 149031306 |

|   |                                  |             |      |      |           |
|---|----------------------------------|-------------|------|------|-----------|
| 1 | 69096 length 698 cvg_5.0_tip_1   | 1.60204E-09 | 698  | 1545 | 164665416 |
| 1 | 70026 length 770 cvg_6.0_tip_1   | 6.8944E-15  | 770  | 452  | 311276323 |
| 1 | 53324 length 300 cvg_6.0_tip_1   | 1.06433E-07 | 300  | 957  | 73999407  |
| 1 | 62182 length 433 cvg_7.0_tip_1   | 1.33318E-10 | 433  | 3404 | 83317874  |
| 1 | 66378 length 556 cvg_9.0_tip_1   | 1.66989E-11 | 556  | 927  | 301755430 |
| 1 | 54438 length 310 cvg_7.0_tip_1   | 9.201E-12   | 310  | 1208 | 74008436  |
| 1 | 54628 length 312 cvg_4.0_tip_1   | 3.05172E-07 | 312  | 295  | 301774871 |
| 1 | 57312 length 348 cvg_6.1_tip_1   | 1.55282E-06 | 348  | 1402 | 73951376  |
| 1 | 57674 length 353 cvg_8.0_tip_1   | 1.08E-34    | 353  | 1272 | 73974662  |
| 1 | 58430 length 365 cvg_3.8_tip_1   | 5.55E-25    | 365  | 1272 | 73974662  |
| 1 | 59026 length 376 cvg_8.0_tip_1   | 1.65E-16    | 376  | 1208 | 74008436  |
| 1 | 59662 length 386 cvg_7.0_tip_1   | 3.84E-39    | 386  | 1402 | 74011366  |
| 1 | 60610 length 402 cvg_6.2_tip_1   | 1.4879E-09  | 402  | 1272 | 73974662  |
| 1 | 61958 length 428 cvg_6.0_tip_1   | 1.15E-22    | 428  | 1402 | 73951376  |
| 1 | 63508 length 466 cvg_8.0_tip_1   | 2.75E-39    | 466  | 1344 | 73971897  |
| 1 | 64086 length 482 cvg_3.9_tip_1   | 5.94083E-11 | 482  | 1208 | 74008436  |
| 1 | 65476 length 525 cvg_7.4_tip_1   | 2.81E-50    | 525  | 1402 | 74011366  |
| 1 | 66592 length 564 cvg_53.6_tip_1  | 1.51E-57    | 564  | 1344 | 73999461  |
| 1 | 67284 length 595 cvg_11.6_tip_1  | 5.60765E-14 | 595  | 1275 | 74008029  |
| 1 | 68340 length 647 cvg_7.3_tip_1   | 7.88E-18    | 647  | 1196 | 74007944  |
| 1 | 68620 length 666 cvg_32.3_tip_1  | 1.30E-34    | 666  | 1275 | 2981631   |
| 1 | 69396 length 719 cvg_7.8_tip_0   | 2.12E-44    | 719  | 1025 | 74007488  |
| 1 | 70044 length 772 cvg_7.6_tip_1   | 9.9786E-06  | 772  | 929  | 73994669  |
| 1 | 70184 length 785 cvg_59.5_tip_0  | 1.19E-26    | 785  | 1384 | 73964662  |
| 1 | 55218 length 320 cvg_5.0_tip_1   | 1.35636E-10 | 320  | 1425 | 46399087  |
| 1 | 58298 length 363 cvg_4.0_tip_1   | 1.86489E-14 | 363  | 1425 | 46399087  |
| 1 | 62914 length 450 cvg_5.0_tip_1   | 9.31E-20    | 450  | 1425 | 46399087  |
| 1 | 63006 length 452 cvg_7.0_tip_1   | 3.30E-17    | 452  | 1327 | 53771848  |
| 1 | 57640 length 353 cvg_5.0_tip_1   | 3.91856E-10 | 353  | 1327 | 53771848  |
| 1 | 66920 length 578 cvg_6.0_tip_1   | 5.92992E-10 | 578  | 1327 | 53771848  |
| 1 | 67238 length 592 cvg_5.0_tip_1   | 9.56521E-14 | 592  | 1413 | 297709805 |
| 1 | 69002 length 692 cvg_4.0_tip_1   | 1.85E-26    | 692  | 1424 | 33859492  |
| 1 | 68152 length 637 cvg_15.0_tip_1  | 5.0909E-14  | 637  | 514  | 50979244  |
| 1 | 69962 length 764 cvg_6.8_tip_1   | 3.96E-31    | 764  | 3404 | 83317874  |
| 1 | 71626 length 990 cvg_8.0_tip_1   | 3.03177E-09 | 990  | 712  | 73966616  |
| 1 | 71728 length 1009 cvg_6.0_tip_1  | 7.99379E-13 | 1009 | 3404 | 83317874  |
| 1 | 72436 length 1179 cvg_7.0_tip_1  | 5.71E-32    | 1179 | 717  | 325085610 |
| 1 | 72630 length 1247 cvg_7.7_tip_1  | 3.41E-22    | 1247 | 589  | 325074608 |
| 1 | 73182 length 1559 cvg_7.2_tip_1  | 6.86E-26    | 1559 | 717  | 325085610 |
| 1 | 73242 length 1630 cvg_7.6_tip_1  | 2.12928E-09 | 1630 | 3404 | 83317874  |
| 1 | 73292 length 1704 cvg_8.0_tip_1  | 1.04E-30    | 1704 | 3404 | 83317874  |
| 1 | 73694 length 2866 cvg_8.1_tip_1  | 5.26E-36    | 2866 | 717  | 325085610 |
| 1 | 63218 length 458 cvg_9.9_tip_1   | 1.51754E-14 | 458  | 347  | 75072732  |
| 1 | 72820 length 1339 cvg_10.8_tip_1 | 2.17E-107   | 1339 | 609  | 51339372  |
| 1 | 70448 length 814 cvg_9.0_tip_1   | 7.88E-76    | 814  | 175  | 108561428 |
| 1 | 68696 length 671 cvg_9.0_tip_1   | 7.96E-16    | 671  | 347  | 108561418 |
| 1 | 65306 length 519 cvg_8.0_tip_1   | 2.01E-28    | 519  | 227  | 288898378 |
| 1 | 69356 length 717 cvg_5.8_tip_1   | 2.60E-26    | 717  | 227  | 5921853   |

|   |                                  |             |      |      |           |
|---|----------------------------------|-------------|------|------|-----------|
| 1 | 59574 length 385 cvg_7.0_tip_1   | 1.51E-26    | 385  | 346  | 262188100 |
| 1 | 56078 length 331 cvg_6.0_tip_1   | 1.38276E-07 | 331  | 3404 | 83317874  |
| 1 | 62954 length 451 cvg_6.0_tip_1   | 2.45E-20    | 451  | 3404 | 83317874  |
| 1 | 68816 length 680 cvg_5.9_tip_1   | 1.4044E-15  | 680  | 3404 | 83317874  |
| 1 | 58846 length 372 cvg_4.0_tip_1   | 8.25589E-08 | 372  | 1402 | 74011366  |
| 1 | 71974 length 1060 cvg_49.6_tip_1 | 4.07E-19    | 1060 | 1272 | 148645276 |
| 1 | 64902 length 507 cvg_10.0_tip_1  | 2.33E-31    | 507  | 514  | 326536079 |
| 1 | 72696 length 1271 cvg_5.8_tip_1  | 1.86835E-07 | 1271 | 143  | 284079    |
| 1 | 71734 length 1009 cvg_9.4_tip_1  | 9.85846E-09 | 1009 | 68   | 119599122 |
| 1 | 60352 length 397 cvg_8.0_tip_1   | 1.43956E-09 | 397  | 1402 | 73951376  |
| 1 | 62016 length 430 cvg_7.0_tip_1   | 7.63E-26    | 430  | 118  | 148292222 |
| 1 | 62066 length 431 cvg_9.0_tip_1   | 5.51E-81    | 431  | 277  | 310756654 |
| 1 | 57518 length 351 cvg_7.1_tip_1   | 1.54687E-06 | 351  | 142  | 260782220 |
| 1 | 62018 length 430 cvg_4.0_tip_1   | 1.38549E-07 | 430  | 231  | 194687705 |
| 1 | 66650 length 566 cvg_6.0_tip_1   | 2.84581E-06 | 566  | 231  | 194687705 |
| 1 | 73234 length 1624 cvg_5.0_tip_1  | 1.68289E-06 | 1624 | 390  | 4098582   |
| 1 | 73380 length 1833 cvg_10.0_tip_1 | 1.65E-37    | 1833 | 1272 | 66734174  |
| 1 | 68486 length 656 cvg_6.0_tip_1   | 3.28E-17    | 656  | 1272 | 148645276 |
| 1 | 73614 length 2369 cvg_9.0_tip_1  | 4.40E-53    | 2369 | 847  | 74008523  |
| 1 | 65104 length 513 cvg_6.6_tip_1   | 4.62478E-14 | 513  | 183  | 297250762 |
| 1 | 63532 length 467 cvg_7.8_tip_1   | 3.11286E-15 | 467  | 1272 | 66734174  |
| 1 | 55082 length 318 cvg_11.0_tip_1  | 1.07E-23    | 318  | 1272 | 66734174  |
| 1 | 73042 length 1474 cvg_6.9_tip_1  | 8.36E-18    | 1474 | 3404 | 83317874  |
| 1 | 72734 length 1288 cvg_5.0_tip_1  | 1.12E-23    | 1288 | 1272 | 66734174  |
| 1 | 62126 length 432 cvg_8.0_tip_1   | 8.95969E-15 | 432  | 1272 | 148645276 |
| 1 | 67452 length 601 cvg_5.6_tip_1   | 4.63E-16    | 601  | 296  | 148645275 |
| 1 | 64504 length 494 cvg_6.0_tip_1   | 5.6714E-13  | 494  | 957  | 73999407  |
| 1 | 58446 length 365 cvg_4.0_tip_1   | 7.52951E-06 | 365  | 308  | 66734173  |
| 1 | 66358 length 555 cvg_9.0_tip_1   | 1.58801E-06 | 555  | 308  | 66734173  |
| 1 | 71136 length 913 cvg_6.0_tip_1   | 4.4797E-10  | 913  | 308  | 66734173  |
| 1 | 69372 length 718 cvg_8.0_tip_1   | 4.53E-34    | 718  | 1272 | 148645276 |
| 1 | 65668 length 531 cvg_6.0_tip_1   | 4.63061E-14 | 531  | 812  | 74007908  |
| 1 | 72294 length 1141 cvg_10.3_tip_1 | 2.46E-16    | 1141 | 754  | 73988965  |
| 1 | 73000 length 1444 cvg_5.0_tip_1  | 2.22059E-12 | 1444 | 1272 | 66734174  |
| 1 | 63658 length 470 cvg_11.0_tip_1  | 5.24201E-12 | 470  | 812  | 74007908  |
| 1 | 71764 length 1014 cvg_5.0_tip_1  | 1.17E-26    | 1014 | 1275 | 2072972   |
| 1 | 55806 length 327 cvg_5.0_tip_1   | 1.00144E-11 | 327  | 1346 | 74007229  |
| 1 | 72402 length 1172 cvg_9.0_tip_1  | 1.31892E-14 | 1172 | 1275 | 2072967   |
| 1 | 70960 length 889 cvg_6.0_tip_1   | 3.79E-24    | 889  | 764  | 253769266 |
| 1 | 73660 length 2585 cvg_10.0_tip_1 | 1.30E-56    | 2585 | 1275 | 2120083   |
| 1 | 58860 length 373 cvg_9.0_tip_1   | 3.23351E-15 | 373  | 128  | 119607362 |
| 1 | 55434 length 322 cvg_4.0_tip_1   | 5.99175E-12 | 322  | 1272 | 66734174  |
| 1 | 66940 length 579 cvg_5.1_tip_1   | 7.04E-25    | 579  | 1272 | 148645276 |
| 1 | 72164 length 1105 cvg_7.0_tip_1  | 4.72826E-09 | 1105 | 1275 | 2072967   |
| 1 | 60608 length 402 cvg_4.0_tip_1   | 3.28E-21    | 402  | 1207 | 74007516  |
| 1 | 72380 length 1164 cvg_5.5_tip_1  | 8.60E-33    | 1164 | 1344 | 73971897  |
| 1 | 64810 length 504 cvg_10.0_tip_1  | 2.57899E-06 | 504  | 290  | 115954328 |
| 1 | 56340 length 334 cvg_5.0_tip_1   | 5.55E-30    | 334  | 180  | 297250696 |

|   |                                 |             |      |      |           |
|---|---------------------------------|-------------|------|------|-----------|
| 1 | 66544 length 563 cvg_8.0_tip_1  | 2.32E-32    | 563  | 1031 | 73979343  |
| 1 | 66662 length 567 cvg_5.0_tip_1  | 8.41E-21    | 567  | 1402 | 74011366  |
| 1 | 55168 length 319 cvg_6.0_tip_1  | 3.35325E-09 | 319  | 123  | 296315065 |
| 1 | 63024 length 453 cvg_5.0_tip_1  | 1.35958E-12 | 453  | 123  | 296315065 |
| 1 | 65052 length 511 cvg_5.0_tip_1  | 4.31E-20    | 511  | 1272 | 148645276 |
| 1 | 69744 length 745 cvg_7.0_tip_1  | 4.62E-30    | 745  | 1031 | 73979343  |
| 1 | 64402 length 491 cvg_18.1_tip_0 | 3.54217E-11 | 491  | 705  | 190576558 |
| 1 | 70486 length 818 cvg_5.0_tip_1  | 2.23E-20    | 818  | 1274 | 73976474  |
| 1 | 59426 length 382 cvg_6.0_tip_1  | 3.69E-16    | 382  | 1272 | 66734174  |
| 1 | 59966 length 391 cvg_8.0_tip_1  | 1.62431E-06 | 391  | 437  | 301783049 |
| 1 | 57784 length 355 cvg_55.0_tip_0 | 5.41E-22    | 355  | 562  | 183396383 |
| 1 | 57850 length 356 cvg_6.0_tip_1  | 7.86516E-11 | 356  | 128  | 281354416 |
| 1 | 63078 length 454 cvg_6.0_tip_1  | 5.06E-18    | 454  | 1272 | 148645276 |
| 1 | 70666 length 846 cvg_5.2_tip_1  | 7.43E-24    | 846  | 1275 | 73973846  |
| 1 | 73416 length 1901 cvg_9.0_tip_1 | 2.89E-58    | 1901 | 1384 | 73964662  |
| 1 | 55732 length 326 cvg_4.1_tip_1  | 1.59032E-11 | 326  | 1272 | 148645276 |
| 1 | 61076 length 411 cvg_5.0_tip_1  | 5.74932E-13 | 411  | 492  | 74008936  |
| 1 | 62166 length 433 cvg_4.0_tip_1  | 6.98545E-08 | 433  | 1259 | 225047    |
| 1 | 62244 length 435 cvg_6.0_tip_1  | 3.74E-24    | 435  | 1207 | 74007516  |
| 1 | 54720 length 314 cvg_7.0_tip_1  | 6.27E-20    | 314  | 1275 | 2981631   |
| 1 | 57420 length 350 cvg_4.0_tip_1  | 3.89258E-10 | 350  | 1339 | 73946349  |
| 1 | 59726 length 387 cvg_5.0_tip_1  | 8.64716E-10 | 387  | 296  | 148645275 |
| 1 | 63580 length 468 cvg_4.0_tip_1  | 1.40054E-07 | 468  | 296  | 148645275 |
| 1 | 67160 length 589 cvg_10.0_tip_1 | 1.41E-26    | 589  | 957  | 73999407  |
| 1 | 68614 length 665 cvg_4.0_tip_1  | 1.45946E-14 | 665  | 308  | 66734173  |
| 1 | 73016 length 1455 cvg_9.8_tip_1 | 2.84E-17    | 1455 | 295  | 301774871 |
| 1 | 55424 length 322 cvg_5.0_tip_1  | 4.80624E-08 | 322  | 61   | 296314328 |
| 1 | 70190 length 786 cvg_9.9_tip_1  | 9.10629E-12 | 786  | 754  | 73988965  |
| 1 | 62162 length 433 cvg_5.0_tip_1  | 6.83115E-15 | 433  | 1275 | 73966507  |
| 1 | 63786 length 473 cvg_4.0_tip_1  | 6.87341E-15 | 473  | 1272 | 148645276 |
| 1 | 64452 length 493 cvg_14.2_tip_1 | 8.53112E-10 | 493  | 774  | 73945978  |
| 1 | 61642 length 422 cvg_6.7_tip_1  | 6.72904E-10 | 422  | 1366 | 73996185  |
| 1 | 62010 length 429 cvg_8.0_tip_1  | 5.83209E-14 | 429  | 718  | 74007494  |
| 1 | 65568 length 527 cvg_5.0_tip_1  | 8.21E-20    | 527  | 718  | 74007494  |
| 1 | 67862 length 620 cvg_8.0_tip_1  | 4.18845E-15 | 620  | 1275 | 2981631   |
| 1 | 62226 length 434 cvg_6.0_tip_1  | 5.01287E-11 | 434  | 224  | 119589289 |
| 1 | 63238 length 459 cvg_4.0_tip_1  | 3.53E-39    | 459  | 1273 | 73975969  |
| 1 | 57634 length 353 cvg_6.0_tip_1  | 1.36554E-10 | 353  | 1384 | 73964662  |
| 1 | 56290 length 334 cvg_4.0_tip_1  | 8.01337E-11 | 334  | 1402 | 74011366  |
| 1 | 69022 length 693 cvg_60.2_tip_0 | 3.73E-19    | 693  | 1384 | 73964662  |
| 1 | 61282 length 414 cvg_5.0_tip_1  | 5.7791E-06  | 414  | 61   | 296314328 |
| 1 | 61866 length 426 cvg_4.0_tip_1  | 8.45703E-13 | 426  | 847  | 74008523  |
| 1 | 64358 length 490 cvg_8.6_tip_1  | 1.39E-27    | 490  | 1275 | 73985407  |
| 1 | 64498 length 494 cvg_8.0_tip_1  | 1.55E-33    | 494  | 183  | 297250762 |
| 1 | 70086 length 775 cvg_9.0_tip_1  | 1.14E-50    | 775  | 1159 | 74003681  |
| 1 | 73108 length 1518 cvg_9.0_tip_1 | 3.88E-50    | 1518 | 1402 | 73951376  |
| 1 | 56466 length 336 cvg_6.0_tip_1  | 7.17E-26    | 336  | 1338 | 73999443  |
| 1 | 62170 length 433 cvg_10.0_tip_1 | 1.21E-19    | 433  | 1272 | 148645276 |

|   |                                  |             |      |      |           |
|---|----------------------------------|-------------|------|------|-----------|
| 1 | 65358 length 521 cvg_8.5_tip_1   | 1.26527E-08 | 521  | 950  | 73971725  |
| 1 | 65394 length 523 cvg_8.0_tip_1   | 3.70E-41    | 523  | 1272 | 66734174  |
| 1 | 66580 length 564 cvg_9.0_tip_1   | 3.45345E-06 | 564  | 97   | 51102308  |
| 1 | 71814 length 1023 cvg_6.0_tip_1  | 1.16E-19    | 1023 | 113  | 281350181 |
| 1 | 72342 length 1155 cvg_11.0_tip_1 | 1.68E-37    | 1155 | 1384 | 73964662  |
| 1 | 58124 length 360 cvg_6.0_tip_1   | 3.19E-23    | 360  | 183  | 297250762 |
| 1 | 61994 length 429 cvg_5.0_tip_1   | 1.2774E-13  | 429  | 123  | 296315065 |
| 1 | 73520 length 2106 cvg_52.2_tip_0 | 2.88E-140   | 2106 | 1280 | 106322    |
| 1 | 63634 length 469 cvg_4.0_tip_1   | 2.26E-24    | 469  | 1275 | 73973846  |
| 1 | 64758 length 503 cvg_7.0_tip_1   | 7.92E-48    | 503  | 1275 | 73973846  |
| 1 | 70880 length 875 cvg_5.0_tip_1   | 4.3358E-06  | 875  | 1402 | 74011366  |
| 1 | 66530 length 562 cvg_4.0_tip_1   | 2.22717E-07 | 562  | 492  | 74008936  |
| 1 | 72862 length 1364 cvg_5.0_tip_1  | 1.64E-37    | 1364 | 1272 | 66734174  |
| 1 | 60568 length 401 cvg_3.0_tip_1   | 1.39833E-07 | 401  | 1272 | 148645276 |
| 1 | 59318 length 380 cvg_5.0_tip_1   | 4.049E-07   | 380  | 722  | 73975967  |
| 1 | 61096 length 411 cvg_5.0_tip_1   | 6.11E-17    | 411  | 1275 | 2981631   |
| 1 | 66316 length 554 cvg_9.0_tip_1   | 6.88829E-10 | 554  | 1275 | 73973846  |
| 1 | 59626 length 386 cvg_4.0_tip_1   | 4.72E-39    | 386  | 180  | 297250696 |
| 1 | 62480 length 440 cvg_4.0_tip_1   | 1.38222E-15 | 440  | 418  | 74007231  |
| 1 | 58588 length 368 cvg_5.0_tip_1   | 1.63E-25    | 368  | 1272 | 66734174  |
| 1 | 66752 length 571 cvg_8.0_tip_1   | 6.54705E-14 | 571  | 86   | 261381444 |
| 1 | 55854 length 328 cvg_6.0_tip_1   | 1.03E-31    | 328  | 1272 | 66734174  |
| 1 | 63204 length 458 cvg_9.0_tip_1   | 8.88E-23    | 458  | 730  | 74007942  |
| 1 | 62514 length 441 cvg_5.0_tip_1   | 4.00E-44    | 441  | 1275 | 2981631   |
| 1 | 55630 length 325 cvg_5.0_tip_1   | 4.91E-16    | 325  | 492  | 73973943  |
| 1 | 60880 length 407 cvg_6.0_tip_1   | 1.68484E-14 | 407  | 1272 | 148645276 |
| 1 | 63936 length 478 cvg_9.0_tip_1   | 1.10E-23    | 478  | 286  | 74008031  |
| 1 | 68306 length 644 cvg_8.0_tip_1   | 1.25E-34    | 644  | 1275 | 74008029  |
| 1 | 68610 length 665 cvg_4.0_tip_1   | 7.38E-41    | 665  | 1031 | 73979343  |
| 1 | 69226 length 706 cvg_6.0_tip_1   | 1.36E-19    | 706  | 1377 | 74007490  |
| 1 | 73274 length 1680 cvg_9.0_tip_1  | 3.35E-100   | 1680 | 1344 | 73999461  |
| 1 | 56206 length 333 cvg_5.0_tip_1   | 2.77E-24    | 333  | 764  | 253769266 |
| 1 | 60262 length 395 cvg_4.0_tip_1   | 2.23E-37    | 395  | 1402 | 74011366  |
| 1 | 68740 length 674 cvg_6.0_tip_1   | 1.24E-16    | 674  | 1275 | 2981631   |
| 1 | 69086 length 697 cvg_49.7_tip_0  | 5.44996E-10 | 697  | 295  | 301774871 |
| 1 | 64214 length 486 cvg_6.0_tip_1   | 5.65E-40    | 486  | 1275 | 73973846  |
| 1 | 64992 length 509 cvg_7.7_tip_1   | 6.04003E-06 | 509  | 427  | 281351415 |
| 1 | 55522 length 324 cvg_4.0_tip_1   | 1.12425E-14 | 324  | 1272 | 148645276 |
| 1 | 67324 length 596 cvg_5.0_tip_1   | 4.41E-19    | 596  | 1207 | 74007516  |
| 1 | 69668 length 740 cvg_9.9_tip_1   | 1.17E-24    | 740  | 1272 | 66734174  |
| 1 | 69934 length 761 cvg_8.0_tip_1   | 3.56E-16    | 761  | 296  | 148645275 |
| 1 | 70768 length 859 cvg_8.0_tip_1   | 6.08E-29    | 859  | 1275 | 2072961   |
| 1 | 72902 length 1382 cvg_60.3_tip_0 | 8.15E-30    | 1382 | 1272 | 148645276 |
| 1 | 70776 length 860 cvg_10.0_tip_1  | 5.51E-22    | 860  | 524  | 296235005 |
| 1 | 56428 length 336 cvg_4.6_tip_1   | 5.23467E-07 | 336  | 1275 | 73966507  |
| 1 | 72212 length 1117 cvg_10.0_tip_1 | 1.10183E-13 | 1117 | 1275 | 74007557  |
| 1 | 70164 length 784 cvg_8.6_tip_1   | 2.80115E-12 | 784  | 1272 | 66734174  |
| 1 | 57368 length 349 cvg_8.0_tip_1   | 1.51E-22    | 349  | 1272 | 148645276 |

|   |                                  |             |      |      |           |
|---|----------------------------------|-------------|------|------|-----------|
| 1 | 63492 length 466 cvg_6.0_tip_1   | 2.23E-29    | 466  | 1272 | 148645276 |
| 1 | 65202 length 516 cvg_5.0_tip_1   | 1.85E-24    | 516  | 1272 | 148645276 |
| 1 | 69036 length 694 cvg_9.0_tip_1   | 2.12104E-06 | 694  | 1300 | 209553980 |
| 1 | 59486 length 383 cvg_5.0_tip_1   | 2.13E-16    | 383  | 118  | 296315057 |
| 1 | 58902 length 373 cvg_6.0_tip_1   | 1.96E-26    | 373  | 1275 | 73966507  |
| 1 | 60602 length 402 cvg_7.0_tip_1   | 2.88E-45    | 402  | 1363 | 74002870  |
| 1 | 71806 length 1022 cvg_4.8_tip_1  | 7.39401E-06 | 1022 | 1275 | 2072967   |
| 1 | 57698 length 354 cvg_6.0_tip_1   | 6.25608E-08 | 354  | 1025 | 74007488  |
| 1 | 73162 length 1546 cvg_11.0_tip_1 | 7.05E-31    | 1546 | 1275 | 74008029  |
| 1 | 55466 length 323 cvg_37.4_tip_1  | 1.2648E-08  | 323  | 894  | 47226214  |
| 1 | 56996 length 344 cvg_4.0_tip_1   | 3.03506E-10 | 344  | 776  | 92110047  |
| 1 | 57158 length 346 cvg_4.0_tip_1   | 1.03916E-10 | 346  | 776  | 92110047  |
| 1 | 58304 length 363 cvg_55.0_tip_0  | 4.57527E-11 | 363  | 776  | 92110047  |
| 1 | 62812 length 447 cvg_4.0_tip_1   | 1.65361E-08 | 447  | 897  | 327289093 |
| 1 | 63250 length 459 cvg_55.2_tip_0  | 7.99E-24    | 459  | 776  | 92110047  |
| 1 | 63802 length 474 cvg_58.0_tip_0  | 1.87181E-12 | 474  | 876  | 170583274 |
| 1 | 65112 length 513 cvg_60.8_tip_0  | 1.20474E-09 | 513  | 776  | 92110047  |
| 1 | 66078 length 545 cvg_5.0_tip_1   | 6.73225E-07 | 545  | 776  | 92110047  |
| 1 | 68032 length 630 cvg_58.0_tip_0  | 3.21629E-13 | 630  | 558  | 297710917 |
| 1 | 72200 length 1114 cvg_61.8_tip_0 | 9.72E-27    | 1114 | 776  | 92110047  |
| 1 | 73640 length 2504 cvg_53.7_tip_1 | 1.04638E-08 | 2504 | 776  | 92110047  |
| 1 | 69740 length 745 cvg_6.0_tip_1   | 8.16E-31    | 745  | 708  | 226437753 |
| 1 | 71600 length 982 cvg_6.0_tip_1   | 7.37E-16    | 982  | 660  | 227937255 |
| 1 | 56972 length 344 cvg_3.0_tip_1   | 1.31E-21    | 344  | 96   | 281350370 |
| 1 | 67128 length 588 cvg_5.6_tip_1   | 1.63E-26    | 588  | 1273 | 73975969  |
| 1 | 72484 length 1198 cvg_5.0_tip_1  | 8.63E-21    | 1198 | 1402 | 73951376  |
| 1 | 72700 length 1272 cvg_9.8_tip_1  | 9.39E-30    | 1272 | 1274 | 73976474  |
| 1 | 73126 length 1527 cvg_11.0_tip_1 | 2.95E-76    | 1527 | 1196 | 74007944  |
| 1 | 55350 length 321 cvg_7.0_tip_1   | 2.34E-29    | 321  | 1402 | 73951376  |
| 1 | 55558 length 324 cvg_10.6_tip_1  | 4.56E-17    | 324  | 1402 | 73951376  |
| 1 | 56598 length 338 cvg_4.0_tip_1   | 9.58E-26    | 338  | 192  | 297250927 |
| 1 | 56680 length 339 cvg_5.0_tip_1   | 3.01E-27    | 339  | 1159 | 74003681  |
| 1 | 57102 length 345 cvg_7.0_tip_1   | 4.88E-16    | 345  | 1275 | 73966507  |
| 1 | 57730 length 354 cvg_6.0_tip_1   | 5.97216E-12 | 354  | 1240 | 73981667  |
| 1 | 59154 length 378 cvg_6.0_tip_1   | 4.05E-20    | 378  | 102  | 281338154 |
| 1 | 60674 length 403 cvg_16.2_tip_1  | 3.21967E-14 | 403  | 957  | 73999407  |
| 1 | 62110 length 432 cvg_8.0_tip_1   | 4.15E-20    | 432  | 1339 | 73946349  |
| 1 | 62522 length 441 cvg_6.0_tip_1   | 3.23E-33    | 441  | 1272 | 66734174  |
| 1 | 63424 length 464 cvg_4.0_tip_1   | 2.93E-16    | 464  | 1207 | 74007516  |
| 1 | 63794 length 474 cvg_4.0_tip_1   | 1.29E-16    | 474  | 1338 | 73999443  |
| 1 | 64380 length 490 cvg_6.9_tip_1   | 1.23353E-06 | 490  | 929  | 73994669  |
| 1 | 65132 length 514 cvg_5.0_tip_1   | 1.15E-31    | 514  | 1366 | 73996185  |
| 1 | 65246 length 517 cvg_6.0_tip_1   | 4.36651E-07 | 517  | 194  | 98989852  |
| 1 | 65584 length 528 cvg_6.8_tip_1   | 3.99E-26    | 528  | 1272 | 148645276 |
| 1 | 65868 length 538 cvg_8.2_tip_1   | 4.13E-43    | 538  | 1272 | 66734174  |
| 1 | 66718 length 570 cvg_6.0_tip_1   | 2.71021E-12 | 570  | 764  | 253769266 |
| 1 | 66828 length 574 cvg_7.0_tip_1   | 4.24E-44    | 574  | 1273 | 73975969  |
| 1 | 66842 length 574 cvg_8.0_tip_1   | 9.24E-61    | 574  | 1338 | 73999443  |

|   |                                  |             |      |      |           |
|---|----------------------------------|-------------|------|------|-----------|
| 1 | 66942 length 579 cvg_10.0_tip_1  | 3.05127E-13 | 579  | 957  | 73999407  |
| 1 | 67096 length 586 cvg_8.0_tip_1   | 3.31E-36    | 586  | 1079 | 74006100  |
| 1 | 67214 length 592 cvg_8.9_tip_1   | 6.81E-36    | 592  | 1344 | 73971897  |
| 1 | 67218 length 592 cvg_7.0_tip_1   | 2.03268E-08 | 592  | 1338 | 73999443  |
| 1 | 67546 length 605 cvg_8.0_tip_1   | 1.43E-20    | 605  | 1196 | 74007944  |
| 1 | 67650 length 611 cvg_11.0_tip_1  | 3.42869E-07 | 611  | 1272 | 148645276 |
| 1 | 67984 length 627 cvg_10.9_tip_1  | 2.95E-51    | 627  | 1366 | 73996185  |
| 1 | 68250 length 642 cvg_4.0_tip_1   | 1.16E-29    | 642  | 1272 | 148645276 |
| 1 | 68304 length 644 cvg_13.5_tip_1  | 3.93941E-08 | 644  | 308  | 66734173  |
| 1 | 68500 length 657 cvg_9.0_tip_1   | 4.35E-25    | 657  | 1275 | 2981631   |
| 1 | 68856 length 683 cvg_8.5_tip_1   | 3.06E-18    | 683  | 1272 | 148645276 |
| 1 | 68890 length 685 cvg_8.0_tip_1   | 8.22E-60    | 685  | 1208 | 74008436  |
| 1 | 69318 length 713 cvg_6.0_tip_1   | 9.42942E-13 | 713  | 1275 | 73973846  |
| 1 | 70244 length 791 cvg_6.0_tip_1   | 6.15E-30    | 791  | 1344 | 73971897  |
| 1 | 71038 length 900 cvg_9.0_tip_1   | 3.40E-33    | 900  | 1207 | 74007516  |
| 1 | 71066 length 903 cvg_9.0_tip_0   | 6.28E-32    | 903  | 1272 | 148645276 |
| 1 | 71190 length 921 cvg_6.0_tip_1   | 4.41E-16    | 921  | 127  | 281349743 |
| 1 | 71608 length 984 cvg_10.0_tip_1  | 1.27E-23    | 984  | 1402 | 74011366  |
| 1 | 72606 length 1241 cvg_9.6_tip_1  | 4.90581E-13 | 1241 | 1275 | 2072953   |
| 1 | 73298 length 1713 cvg_46.3_tip_1 | 2.39E-68    | 1713 | 1384 | 73964662  |
| 1 | 73436 length 1940 cvg_10.0_tip_1 | 9.23E-108   | 1940 | 1275 | 73973846  |
| 1 | 53372 length 300 cvg_5.0_tip_1   | 1.13E-33    | 300  | 400  | 92110043  |
| 1 | 65342 length 521 cvg_7.0_tip_1   | 3.41596E-09 | 521  | 1275 | 2072967   |
| 1 | 53888 length 305 cvg_4.0_tip_1   | 2.34E-31    | 305  | 2519 | 311276164 |
| 1 | 67828 length 619 cvg_5.0_tip_1   | 6.06111E-09 | 619  | 2571 | 326913484 |
| 1 | 69026 length 694 cvg_5.0_tip_1   | 7.26E-23    | 694  | 225  | 57114083  |
| 1 | 64804 length 504 cvg_10.0_tip_1  | 8.95E-23    | 504  | 313  | 285399861 |
| 1 | 60786 length 405 cvg_4.0_tip_1   | 1.7504E-10  | 405  | 113  | 281352949 |
| 1 | 69616 length 737 cvg_5.0_tip_1   | 3.47E-29    | 737  | 1639 | 74006718  |
| 1 | 70258 length 793 cvg_5.0_tip_1   | 6.88315E-13 | 793  | 2519 | 311276164 |
| 1 | 72528 length 1218 cvg_8.0_tip_1  | 9.79654E-07 | 1218 | 226  | 195182380 |
| 1 | 69438 length 722 cvg_7.0_tip_1   | 3.1132E-11  | 722  | 188  | 149032233 |
| 1 | 71340 length 939 cvg_9.0_tip_1   | 4.57E-33    | 939  | 1275 | 2072977   |
| 1 | 58700 length 370 cvg_6.7_tip_1   | 2.01581E-07 | 370  | 1272 | 148645276 |
| 1 | 61746 length 424 cvg_6.0_tip_1   | 1.18008E-14 | 424  | 730  | 327488513 |
| 1 | 69346 length 716 cvg_6.0_tip_1   | 1.18111E-11 | 716  | 254  | 34532236  |
| 1 | 72768 length 1310 cvg_11.0_tip_1 | 7.39E-28    | 1310 | 1272 | 66734174  |
| 1 | 63984 length 479 cvg_9.0_tip_1   | 2.63922E-12 | 479  | 1259 | 225047    |
| 1 | 61452 length 417 cvg_5.0_tip_1   | 2.60684E-06 | 417  | 1272 | 148645276 |
| 1 | 62644 length 444 cvg_7.9_tip_1   | 2.65139E-06 | 444  | 254  | 34532236  |
| 1 | 65814 length 536 cvg_5.0_tip_1   | 3.73628E-11 | 536  | 1402 | 74011366  |
| 1 | 71086 length 905 cvg_9.9_tip_0   | 1.11281E-13 | 905  | 1384 | 73964662  |
| 1 | 59238 length 379 cvg_4.0_tip_1   | 2.09E-21    | 379  | 1272 | 148645276 |
| 1 | 59242 length 379 cvg_8.0_tip_1   | 7.87E-19    | 379  | 1040 | 301603905 |
| 1 | 54340 length 309 cvg_5.0_tip_1   | 2.57745E-14 | 309  | 128  | 115313021 |
| 1 | 63990 length 479 cvg_7.0_tip_1   | 6.89676E-14 | 479  | 1275 | 17980447  |
| 1 | 65268 length 518 cvg_7.5_tip_1   | 1.69487E-08 | 518  | 224  | 119589289 |
| 1 | 68132 length 635 cvg_5.0_tip_1   | 2.00681E-14 | 635  | 1275 | 2072958   |



|   |                                  |             |      |      |           |
|---|----------------------------------|-------------|------|------|-----------|
| 1 | 66282 length 552 cvg_5.2_tip_1   | 7.73527E-06 | 552  | 1259 | 225047    |
| 1 | 53812 length 304 cvg_7.0_tip_1   | 7.09672E-12 | 304  | 129  | 301761514 |
| 1 | 67768 length 616 cvg_9.0_tip_1   | 1.08E-26    | 616  | 1275 | 2072977   |
| 1 | 53436 length 301 cvg_10.0_tip_1  | 2.76326E-06 | 301  | 419  | 149618125 |
| 1 | 72706 length 1274 cvg_8.6_tip_1  | 8.63279E-13 | 1274 | 754  | 73988965  |
| 1 | 65564 length 527 cvg_9.0_tip_1   | 7.19E-16    | 527  | 1344 | 73999461  |
| 1 | 54734 length 314 cvg_7.0_tip_1   | 3.5916E-08  | 314  | 1272 | 148645276 |
| 1 | 61888 length 427 cvg_8.0_tip_1   | 5.85668E-14 | 427  | 141  | 168066203 |
| 1 | 71382 length 947 cvg_8.0_tip_1   | 1.72185E-06 | 947  | 775  | 311262055 |
| 1 | 61056 length 410 cvg_9.0_tip_1   | 1.74E-26    | 410  | 160  | 119625410 |
| 1 | 73496 length 2042 cvg_7.8_tip_1  | 5.33372E-08 | 2042 | 1275 | 2981631   |
| 1 | 64092 length 482 cvg_6.0_tip_1   | 1.04732E-10 | 482  | 764  | 253769266 |
| 1 | 71420 length 952 cvg_9.1_tip_1   | 2.45E-16    | 952  | 1275 | 2072977   |
| 1 | 61550 length 420 cvg_4.0_tip_1   | 3.16909E-08 | 420  | 1275 | 2072951   |
| 1 | 68988 length 691 cvg_9.0_tip_1   | 7.98E-26    | 691  | 1300 | 209553980 |
| 1 | 64962 length 508 cvg_5.1_tip_1   | 3.81069E-13 | 508  | 88   | 281354217 |
| 1 | 67754 length 616 cvg_8.0_tip_1   | 1.11218E-07 | 616  | 105  | 119606449 |
| 1 | 54156 length 308 cvg_5.0_tip_1   | 1.68205E-06 | 308  | 180  | 297250696 |
| 1 | 56590 length 338 cvg_9.0_tip_1   | 2.11E-24    | 338  | 4154 | 301774951 |
| 1 | 60494 length 399 cvg_5.0_tip_1   | 5.33533E-07 | 399  | 955  | 149060124 |
| 1 | 60112 length 393 cvg_9.4_tip_0   | 3.82065E-10 | 393  | 1182 | 7522108   |
| 1 | 60192 length 394 cvg_10.0_tip_1  | 1.78E-18    | 394  | 833  | 297676074 |
| 1 | 71354 length 943 cvg_7.8_tip_1   | 1.7844E-12  | 943  | 1275 | 74008029  |
| 1 | 63762 length 473 cvg_5.0_tip_1   | 3.8178E-11  | 473  | 363  | 281338530 |
| 1 | 71308 length 935 cvg_8.9_tip_1   | 1.18258E-13 | 935  | 1272 | 66734174  |
| 1 | 64026 length 480 cvg_5.0_tip_1   | 3.4153E-06  | 480  | 1104 | 37361816  |
| 1 | 68932 length 687 cvg_6.0_tip_1   | 1.37142E-11 | 687  | 562  | 183396383 |
| 1 | 67136 length 588 cvg_7.0_tip_1   | 8.37E-41    | 588  | 224  | 119588287 |
| 1 | 55680 length 326 cvg_5.0_tip_1   | 6.68155E-10 | 326  | 1272 | 148645276 |
| 1 | 72224 length 1119 cvg_10.0_tip_1 | 3.67E-25    | 1119 | 1054 | 296213519 |
| 1 | 71612 length 986 cvg_8.9_tip_1   | 5.56237E-07 | 986  | 192  | 297250927 |
| 1 | 71232 length 925 cvg_9.8_tip_1   | 7.55542E-08 | 925  | 957  | 73999407  |
| 1 | 71830 length 1026 cvg_9.0_tip_1  | 6.93891E-12 | 1026 | 1272 | 66734174  |
| 1 | 62916 length 450 cvg_9.0_tip_1   | 1.03129E-10 | 450  | 157  | 1196431   |
| 1 | 56908 length 343 cvg_9.0_tip_1   | 4.10674E-12 | 343  | 416  | 73978163  |
| 1 | 62754 length 446 cvg_6.0_tip_1   | 2.64002E-06 | 446  | 1272 | 148645276 |
| 1 | 72518 length 1213 cvg_9.0_tip_1  | 2.20343E-10 | 1213 | 1421 | 296222541 |
| 1 | 69040 length 695 cvg_7.0_tip_1   | 8.98327E-13 | 695  | 397  | 301784823 |
| 1 | 72084 length 1084 cvg_9.0_tip_1  | 1.79E-21    | 1084 | 1280 | 106322    |
| 1 | 67772 length 617 cvg_8.0_tip_1   | 5.72567E-08 | 617  | 1272 | 66734174  |
| 1 | 62308 length 436 cvg_6.8_tip_1   | 8.60468E-10 | 436  | 1275 | 73973846  |
| 1 | 68466 length 655 cvg_9.0_tip_1   | 1.70275E-15 | 655  | 1260 | 126296    |
| 1 | 70340 length 802 cvg_9.0_tip_1   | 9.10E-24    | 802  | 562  | 364964    |
| 1 | 58672 length 369 cvg_8.0_tip_1   | 1.95E-33    | 369  | 1516 | 297285485 |
| 1 | 71374 length 945 cvg_9.0_tip_1   | 6.97E-16    | 945  | 367  | 326921974 |
| 1 | 66490 length 560 cvg_8.0_tip_1   | 9.65461E-07 | 560  | 1272 | 148645276 |
| 1 | 65542 length 527 cvg_7.3_tip_1   | 7.91E-31    | 527  | 1275 | 2072977   |
| 1 | 65338 length 521 cvg_6.5_tip_1   | 9.39805E-12 | 521  | 1280 | 106322    |

|   |                                  |             |      |      |           |
|---|----------------------------------|-------------|------|------|-----------|
| 1 | 72182 length 1109 cvg_9.0_tip_1  | 4.29529E-10 | 1109 | 313  | 301761816 |
| 1 | 68906 length 686 cvg_11.0_tip_1  | 7.75395E-13 | 686  | 1272 | 66734174  |
| 1 | 69670 length 740 cvg_9.0_tip_1   | 4.05055E-13 | 740  | 1281 | 558908    |
| 1 | 68068 length 633 cvg_8.0_tip_1   | 2.54093E-10 | 633  | 1272 | 148645276 |
| 1 | 62434 length 439 cvg_10.0_tip_1  | 1.66E-29    | 439  | 1939 | 119596893 |
| 1 | 67670 length 612 cvg_7.0_tip_1   | 6.01799E-06 | 612  | 254  | 297299728 |
| 1 | 61352 length 416 cvg_7.0_tip_1   | 4.38417E-11 | 416  | 180  | 297250696 |
| 1 | 71766 length 1015 cvg_18.0_tip_1 | 2.97206E-07 | 1015 | 123  | 149032404 |
| 1 | 56816 length 341 cvg_6.0_tip_1   | 2.32E-23    | 341  | 1272 | 66734174  |
| 1 | 60638 length 402 cvg_6.0_tip_1   | 2.24E-20    | 402  | 1280 | 106322    |
| 1 | 54752 length 314 cvg_4.0_tip_1   | 9.01529E-14 | 314  | 762  | 194227826 |
| 1 | 68604 length 664 cvg_9.0_tip_1   | 2.00E-26    | 664  | 1272 | 66734174  |
| 1 | 66978 length 580 cvg_10.0_tip_1  | 2.03809E-10 | 580  | 1344 | 73999461  |
| 1 | 68346 length 647 cvg_9.0_tip_1   | 9.28E-27    | 647  | 2753 | 297274934 |
| 1 | 59784 length 388 cvg_61.6_tip_1  | 1.51E-22    | 388  | 1337 | 126344438 |
| 1 | 70582 length 833 cvg_9.0_tip_1   | 1.10E-19    | 833  | 1260 | 126296    |
| 1 | 59746 length 387 cvg_6.0_tip_1   | 8.94841E-07 | 387  | 159  | 148703677 |
| 1 | 71304 length 935 cvg_10.0_tip_1  | 4.88527E-14 | 935  | 573  | 2197085   |
| 1 | 57588 length 352 cvg_5.0_tip_1   | 1.95E-18    | 352  | 1272 | 148645276 |
| 1 | 71314 length 936 cvg_6.0_tip_1   | 5.27574E-07 | 936  | 156  | 70939614  |
| 1 | 69664 length 740 cvg_58.8_tip_1  | 1.3488E-14  | 740  | 1272 | 148645276 |
| 1 | 57408 length 350 cvg_7.0_tip_1   | 2.38648E-07 | 350  | 562  | 183396383 |
| 1 | 73408 length 1888 cvg_10.0_tip_1 | 8.4371E-07  | 1888 | 904  | 73964664  |
| 1 | 60536 length 400 cvg_8.0_tip_1   | 1.61143E-07 | 400  | 377  | 73971610  |
| 1 | 68532 length 660 cvg_7.0_tip_1   | 2.99949E-12 | 660  | 123  | 296315065 |
| 1 | 68422 length 651 cvg_7.7_tip_1   | 2.95722E-06 | 651  | 123  | 296315065 |
| 1 | 58416 length 365 cvg_4.0_tip_1   | 8.69E-27    | 365  | 1031 | 73979343  |
| 1 | 68660 length 669 cvg_8.0_tip_1   | 3.26138E-07 | 669  | 1300 | 1791243   |
| 1 | 61584 length 421 cvg_5.0_tip_1   | 5.36E-22    | 421  | 1031 | 73979343  |
| 1 | 71294 length 933 cvg_10.5_tip_1  | 7.69E-30    | 933  | 1057 | 92110051  |
| 1 | 71642 length 993 cvg_8.0_tip_1   | 2.58005E-08 | 993  | 1275 | 2981631   |
| 1 | 73590 length 2310 cvg_9.8_tip_1  | 9.53619E-09 | 2310 | 1260 | 126296    |
| 1 | 57170 length 346 cvg_4.0_tip_1   | 6.73562E-10 | 346  | 1327 | 53771848  |
| 1 | 61734 length 424 cvg_6.0_tip_1   | 1.18779E-06 | 424  | 108  | 119608864 |
| 1 | 70720 length 851 cvg_9.0_tip_1   | 1.05684E-09 | 851  | 367  | 804811    |
| 1 | 69720 length 743 cvg_5.0_tip_1   | 1.03229E-12 | 743  | 1272 | 148645276 |
| 1 | 68348 length 647 cvg_5.0_tip_1   | 8.54241E-07 | 647  | 1272 | 148645276 |
| 1 | 65400 length 523 cvg_9.0_tip_1   | 6.23465E-09 | 523  | 1275 | 2981631   |
| 1 | 69562 length 733 cvg_11.0_tip_1  | 7.1997E-11  | 733  | 385  | 62087934  |
| 1 | 56006 length 330 cvg_6.6_tip_1   | 5.81791E-14 | 330  | 129  | 164430490 |
| 1 | 55714 length 326 cvg_9.0_tip_1   | 9.32333E-12 | 326  | 763  | 291403264 |
| 1 | 55334 length 321 cvg_7.0_tip_1   | 2.01929E-06 | 321  | 562  | 364964    |
| 1 | 61234 length 413 cvg_6.0_tip_1   | 4.25421E-14 | 413  | 252  | 116283716 |
| 1 | 72292 length 1140 cvg_8.7_tip_1  | 6.91606E-11 | 1140 | 584  | 327272746 |
| 1 | 58748 length 371 cvg_5.0_tip_1   | 3.88044E-06 | 371  | 119  | 281341662 |
| 1 | 64820 length 505 cvg_5.0_tip_1   | 1.38138E-15 | 505  | 1275 | 2981631   |
| 1 | 67612 length 609 cvg_10.0_tip_1  | 3.23E-36    | 609  | 243  | 119568404 |
| 1 | 66122 length 546 cvg_7.0_tip_1   | 5.46375E-07 | 546  | 1272 | 148645276 |

|   |                                  |             |      |      |           |
|---|----------------------------------|-------------|------|------|-----------|
| 1 | 58082 length 359 cvg_10.0_tip_1  | 3.06457E-12 | 359  | 1272 | 66734174  |
| 1 | 55240 length 320 cvg_4.0_tip_1   | 7.18E-20    | 320  | 454  | 2226004   |
| 1 | 57610 length 353 cvg_6.0_tip_1   | 1.17E-22    | 353  | 591  | 114583892 |
| 1 | 62032 length 430 cvg_7.0_tip_1   | 2.76E-21    | 430  | 454  | 2226004   |
| 1 | 70216 length 788 cvg_7.9_tip_1   | 2.48436E-09 | 788  | 1272 | 73974662  |
| 1 | 71624 length 990 cvg_9.9_tip_1   | 7.64E-17    | 990  | 664  | 73987678  |
| 1 | 53822 length 304 cvg_6.0_tip_1   | 6.39531E-13 | 304  | 1272 | 66734174  |
| 1 | 63948 length 478 cvg_5.0_tip_1   | 5.28E-28    | 478  | 1344 | 73999461  |
| 1 | 70622 length 840 cvg_5.0_tip_1   | 8.50E-26    | 840  | 1272 | 66734174  |
| 1 | 68404 length 650 cvg_4.0_tip_1   | 3.71267E-07 | 650  | 296  | 148645275 |
| 1 | 70508 length 822 cvg_9.4_tip_1   | 4.68613E-09 | 822  | 419  | 149618125 |
| 1 | 56872 length 342 cvg_5.0_tip_1   | 6.13671E-08 | 342  | 562  | 183396383 |
| 1 | 69882 length 757 cvg_8.3_tip_0   | 1.06452E-13 | 757  | 1272 | 148645276 |
| 1 | 66134 length 546 cvg_10.0_tip_1  | 3.34118E-06 | 546  | 1280 | 106322    |
| 1 | 65964 length 541 cvg_7.0_tip_1   | 6.60024E-07 | 541  | 654  | 73984574  |
| 1 | 53610 length 302 cvg_7.0_tip_1   | 9.73054E-11 | 302  | 126  | 281338506 |
| 1 | 70672 length 847 cvg_9.4_tip_1   | 4.25788E-11 | 847  | 712  | 73966616  |
| 1 | 59528 length 384 cvg_5.0_tip_1   | 6.85155E-07 | 384  | 1281 | 558908    |
| 1 | 70118 length 779 cvg_11.0_tip_1  | 7.56771E-09 | 779  | 1275 | 92111133  |
| 1 | 54678 length 313 cvg_8.0_tip_1   | 2.40758E-14 | 313  | 1300 | 2193870   |
| 1 | 71078 length 904 cvg_5.0_tip_1   | 3.53248E-06 | 904  | 1272 | 148645276 |
| 1 | 69112 length 699 cvg_10.0_tip_1  | 4.88E-18    | 699  | 183  | 297250762 |
| 1 | 54038 length 306 cvg_3.0_tip_1   | 1.98536E-06 | 306  | 197  | 114555003 |
| 1 | 63330 length 461 cvg_7.0_tip_1   | 1.5144E-06  | 461  | 299  | 297664742 |
| 1 | 63782 length 473 cvg_6.0_tip_1   | 4.24147E-08 | 473  | 754  | 45478232  |
| 1 | 70616 length 839 cvg_6.0_tip_1   | 4.62764E-08 | 839  | 957  | 73999407  |
| 1 | 58334 length 364 cvg_5.0_tip_1   | 9.31E-18    | 364  | 1272 | 66734174  |
| 1 | 70224 length 789 cvg_10.0_tip_1  | 1.02E-16    | 789  | 1275 | 2072961   |
| 1 | 54082 length 307 cvg_5.0_tip_1   | 4.02228E-10 | 307  | 225  | 125537847 |
| 1 | 65676 length 531 cvg_5.0_tip_1   | 4.6048E-12  | 531  | 135  | 804809    |
| 1 | 71862 length 1032 cvg_10.0_tip_1 | 5.55257E-13 | 1032 | 1272 | 66734174  |
| 1 | 70354 length 803 cvg_6.0_tip_1   | 1.09E-45    | 803  | 1272 | 66734174  |
| 1 | 60508 length 400 cvg_8.0_tip_1   | 1.53366E-14 | 400  | 183  | 297250762 |
| 1 | 72988 length 1439 cvg_5.0_tip_1  | 7.08779E-14 | 1439 | 1503 | 62666798  |
| 1 | 73526 length 2127 cvg_9.0_tip_0  | 2.14556E-11 | 2127 | 1272 | 66734174  |
| 1 | 68554 length 661 cvg_5.0_tip_1   | 1.0345E-07  | 661  | 88   | 281354217 |
| 1 | 72136 length 1099 cvg_10.9_tip_0 | 6.30635E-06 | 1099 | 821  | 307150584 |
| 1 | 70882 length 875 cvg_7.9_tip_0   | 1.85521E-09 | 875  | 700  | 270013850 |
| 1 | 72080 length 1083 cvg_8.2_tip_1  | 2.5489E-09  | 1083 | 821  | 307150584 |
| 1 | 72844 length 1352 cvg_6.9_tip_1  | 6.75707E-11 | 1352 | 3404 | 83317874  |
| 1 | 53326 length 300 cvg_9.5_tip_1   | 7.87496E-11 | 300  | 1716 | 301755346 |
| 1 | 65544 length 527 cvg_6.0_tip_1   | 1.11E-16    | 527  | 1716 | 301755346 |
| 1 | 66168 length 548 cvg_6.0_tip_1   | 3.63974E-08 | 548  | 1931 | 311115255 |
| 1 | 57282 length 348 cvg_8.0_tip_1   | 6.09211E-11 | 348  | 466  | 291394337 |
| 1 | 71112 length 909 cvg_4.0_tip_1   | 2.64E-17    | 909  | 2552 | 327268409 |
| 1 | 63468 length 465 cvg_9.0_tip_1   | 6.30E-16    | 465  | 330  | 114582549 |
| 1 | 62140 length 432 cvg_6.0_tip_1   | 1.6297E-08  | 432  | 491  | 327268317 |
| 1 | 65444 length 524 cvg_5.0_tip_1   | 3.73817E-09 | 524  | 478  | 297493524 |

|   |                                  |             |      |      |           |
|---|----------------------------------|-------------|------|------|-----------|
| 1 | 55938 length 329 cvg_6.8_tip_1   | 4.14091E-09 | 329  | 492  | 73973943  |
| 1 | 53942 length 305 cvg_8.0_tip_1   | 4.42889E-14 | 305  | 183  | 297250762 |
| 1 | 72392 length 1168 cvg_8.0_tip_1  | 2.14148E-07 | 1168 | 1272 | 148645276 |
| 1 | 63158 length 456 cvg_6.0_tip_1   | 3.51384E-11 | 456  | 1716 | 301755346 |
| 1 | 63668 length 471 cvg_8.0_tip_1   | 6.65892E-10 | 471  | 609  | 73964634  |
| 1 | 68710 length 672 cvg_8.0_tip_1   | 2.5096E-09  | 672  | 305  | 301770281 |
| 1 | 57938 length 357 cvg_3.9_tip_1   | 7.61803E-06 | 357  | 1344 | 73999461  |
| 1 | 62464 length 440 cvg_7.0_tip_1   | 5.74705E-06 | 440  | 929  | 73994669  |
| 1 | 55716 length 326 cvg_5.0_tip_1   | 3.66629E-08 | 326  | 184  | 268567568 |
| 1 | 69864 length 755 cvg_4.0_tip_1   | 1.64947E-13 | 755  | 1084 | 297303308 |
| 1 | 53808 length 304 cvg_7.0_tip_1   | 8.45E-16    | 304  | 183  | 297250762 |
| 1 | 68772 length 678 cvg_8.2_tip_1   | 2.03266E-06 | 678  | 74   | 296314573 |
| 1 | 61130 length 412 cvg_24.7_tip_0  | 7.72E-21    | 412  | 1079 | 74006100  |
| 1 | 64392 length 491 cvg_6.0_tip_1   | 1.94366E-09 | 491  | 135  | 34526788  |
| 1 | 58512 length 367 cvg_8.0_tip_1   | 2.06E-21    | 367  | 957  | 73999407  |
| 1 | 67298 length 595 cvg_6.9_tip_1   | 1.02E-57    | 595  | 1275 | 73966507  |
| 1 | 72578 length 1235 cvg_9.0_tip_1  | 1.42E-47    | 1235 | 1385 | 73973206  |
| 1 | 64636 length 498 cvg_5.6_tip_1   | 7.44516E-06 | 498  | 957  | 73999407  |
| 1 | 73196 length 1577 cvg_6.2_tip_1  | 3.76E-18    | 1577 | 1025 | 74007488  |
| 1 | 59462 length 383 cvg_5.0_tip_1   | 1.71E-20    | 383  | 1402 | 73951376  |
| 1 | 61168 length 412 cvg_6.0_tip_1   | 2.12666E-12 | 412  | 418  | 74007231  |
| 1 | 69138 length 700 cvg_9.0_tip_1   | 1.19691E-09 | 700  | 1280 | 106322    |
| 1 | 67098 length 586 cvg_8.0_tip_1   | 9.23E-30    | 586  | 436  | 74008932  |
| 1 | 65370 length 522 cvg_8.0_tip_1   | 7.35315E-10 | 522  | 1079 | 74006100  |
| 1 | 67394 length 599 cvg_4.0_tip_1   | 1.1431E-13  | 599  | 1275 | 73973846  |
| 1 | 72050 length 1077 cvg_9.0_tip_1  | 2.92E-16    | 1077 | 3404 | 83317874  |
| 1 | 61618 length 421 cvg_4.0_tip_1   | 1.65E-32    | 421  | 606  | 167716875 |
| 1 | 65572 length 528 cvg_8.0_tip_1   | 5.34E-46    | 528  | 609  | 51339397  |
| 1 | 72336 length 1155 cvg_7.2_tip_1  | 6.34E-121   | 1155 | 606  | 294774400 |
| 1 | 73194 length 1577 cvg_8.5_tip_1  | 5.17E-21    | 1577 | 183  | 297250762 |
| 1 | 66586 length 564 cvg_8.0_tip_1   | 1.07E-31    | 564  | 436  | 74008932  |
| 1 | 62972 length 452 cvg_6.0_tip_1   | 1.41939E-09 | 452  | 1272 | 148645276 |
| 1 | 67454 length 601 cvg_10.1_tip_1  | 7.51538E-07 | 601  | 338  | 5052950   |
| 1 | 65010 length 510 cvg_7.9_tip_1   | 3.06E-21    | 510  | 609  | 73964634  |
| 1 | 64540 length 495 cvg_5.0_tip_1   | 2.9662E-07  | 495  | 1260 | 126296    |
| 1 | 63356 length 462 cvg_10.0_tip_1  | 2.53708E-07 | 462  | 1272 | 66734174  |
| 1 | 66020 length 542 cvg_8.0_tip_1   | 2.19E-18    | 542  | 1872 | 281349880 |
| 1 | 58406 length 365 cvg_6.0_tip_1   | 1.79215E-07 | 365  | 705  | 190576558 |
| 1 | 61060 length 410 cvg_9.0_tip_1   | 4.23379E-08 | 410  | 712  | 1335205   |
| 1 | 71520 length 967 cvg_9.0_tip_1   | 2.65891E-10 | 967  | 847  | 74008523  |
| 1 | 71914 length 1045 cvg_6.0_tip_1  | 7.62E-26    | 1045 | 1272 | 66734174  |
| 1 | 72432 length 1178 cvg_9.0_tip_1  | 1.15E-16    | 1178 | 812  | 74007908  |
| 1 | 69524 length 729 cvg_7.9_tip_1   | 4.81752E-14 | 729  | 1280 | 106322    |
| 1 | 73074 length 1495 cvg_10.0_tip_1 | 1.5089E-14  | 1495 | 601  | 281342915 |
| 1 | 68564 length 662 cvg_4.7_tip_1   | 4.71E-37    | 662  | 1766 | 297493257 |
| 1 | 64406 length 491 cvg_11.0_tip_1  | 3.91633E-10 | 491  | 382  | 296192078 |
| 1 | 63622 length 469 cvg_59.4_tip_1  | 2.07E-17    | 469  | 1344 | 73999461  |
| 1 | 67384 length 598 cvg_5.0_tip_1   | 3.92369E-15 | 598  | 1275 | 73973941  |

|   |                                  |             |      |      |           |
|---|----------------------------------|-------------|------|------|-----------|
| 1 | 69408 length 721 cvg_9.0_tip_1   | 7.52E-42    | 721  | 754  | 73988965  |
| 1 | 70402 length 809 cvg_5.0_tip_1   | 3.21E-20    | 809  | 1272 | 148645276 |
| 1 | 69342 length 716 cvg_8.0_tip_1   | 7.78408E-07 | 716  | 705  | 190576558 |
| 1 | 66944 length 579 cvg_6.0_tip_1   | 1.11E-31    | 579  | 1275 | 2072964   |
| 1 | 54466 length 311 cvg_5.0_tip_1   | 1.98077E-08 | 311  | 296  | 148645275 |
| 1 | 54468 length 311 cvg_4.0_tip_1   | 4.3238E-08  | 311  | 296  | 148645275 |
| 1 | 54512 length 311 cvg_5.0_tip_1   | 4.0813E-14  | 311  | 1272 | 148645276 |
| 1 | 70028 length 771 cvg_8.2_tip_1   | 3.08E-31    | 771  | 1272 | 148645276 |
| 1 | 64356 length 490 cvg_4.0_tip_1   | 1.49E-18    | 490  | 1272 | 66734174  |
| 1 | 66996 length 581 cvg_6.0_tip_1   | 1.13E-24    | 581  | 664  | 73987678  |
| 1 | 70384 length 806 cvg_5.0_tip_1   | 9.90479E-15 | 806  | 1272 | 148645276 |
| 1 | 62160 length 433 cvg_7.0_tip_1   | 3.39814E-06 | 433  | 1275 | 92111133  |
| 1 | 58312 length 363 cvg_3.0_tip_1   | 2.1253E-08  | 363  | 1300 | 1791243   |
| 1 | 62708 length 445 cvg_4.0_tip_1   | 1.54294E-07 | 445  | 1272 | 66734174  |
| 1 | 61590 length 421 cvg_4.0_tip_1   | 1.71119E-13 | 421  | 827  | 311275908 |
| 1 | 56832 length 342 cvg_5.0_tip_1   | 5.92328E-06 | 342  | 764  | 253769266 |
| 1 | 72310 length 1148 cvg_9.6_tip_1  | 3.70E-28    | 1148 | 1272 | 148645276 |
| 1 | 69818 length 751 cvg_5.0_tip_1   | 6.9971E-07  | 751  | 1272 | 148645276 |
| 1 | 62006 length 429 cvg_5.0_tip_1   | 5.62496E-07 | 429  | 1196 | 74007944  |
| 1 | 66858 length 575 cvg_6.0_tip_1   | 9.22E-16    | 575  | 1272 | 148645276 |
| 1 | 69698 length 742 cvg_7.0_tip_1   | 6.46583E-15 | 742  | 192  | 297250927 |
| 1 | 72780 length 1315 cvg_5.0_tip_1  | 7.30E-23    | 1315 | 1272 | 66734174  |
| 1 | 66734 length 571 cvg_7.0_tip_1   | 4.46748E-07 | 571  | 1272 | 148645276 |
| 1 | 66076 length 545 cvg_4.0_tip_1   | 2.73177E-12 | 545  | 377  | 126661643 |
| 1 | 61440 length 417 cvg_5.8_tip_1   | 5.00912E-10 | 417  | 316  | 167957114 |
| 1 | 73168 length 1549 cvg_10.0_tip_1 | 3.18E-50    | 1549 | 1275 | 2072977   |
| 1 | 61824 length 425 cvg_4.0_tip_1   | 3.99281E-11 | 425  | 1384 | 73964662  |
| 1 | 72176 length 1107 cvg_5.0_tip_1  | 1.73249E-13 | 1107 | 296  | 148645275 |
| 1 | 73244 length 1631 cvg_63.8_tip_0 | 5.61744E-10 | 1631 | 776  | 92110047  |
| 1 | 56780 length 341 cvg_5.0_tip_1   | 1.66E-21    | 341  | 2552 | 224458400 |
| 1 | 57266 length 348 cvg_5.0_tip_1   | 2.6487E-06  | 348  | 2552 | 224458400 |
| 1 | 70912 length 880 cvg_5.0_tip_1   | 6.56E-18    | 880  | 2552 | 224458400 |
| 1 | 72556 length 1227 cvg_5.0_tip_1  | 2.55347E-14 | 1227 | 2547 | 149744453 |
| 1 | 72626 length 1247 cvg_9.8_tip_1  | 5.30057E-14 | 1247 | 377  | 126661643 |
| 1 | 53930 length 305 cvg_4.0_tip_1   | 3.55244E-07 | 305  | 180  | 297250696 |
| 1 | 53618 length 302 cvg_6.0_tip_1   | 6.04924E-13 | 302  | 107  | 297270420 |
| 1 | 57402 length 350 cvg_4.0_tip_1   | 7.09404E-08 | 350  | 1275 | 2072958   |
| 1 | 69920 length 760 cvg_5.0_tip_1   | 1.04E-27    | 760  | 1280 | 106322    |
| 1 | 66330 length 554 cvg_5.0_tip_1   | 3.06522E-10 | 554  | 1344 | 73971897  |
| 1 | 69914 length 759 cvg_6.0_tip_1   | 3.15538E-06 | 759  | 96   | 281349076 |
| 1 | 69544 length 731 cvg_9.0_tip_1   | 9.30E-19    | 731  | 213  | 281338557 |
| 1 | 55438 length 322 cvg_4.0_tip_1   | 2.83312E-12 | 322  | 300  | 296198405 |
| 1 | 73374 length 1827 cvg_11.0_tip_1 | 4.48E-19    | 1827 | 213  | 149027158 |
| 1 | 55018 length 317 cvg_12.7_tip_1  | 5.32E-31    | 317  | 4138 | 301772256 |
| 1 | 62368 length 437 cvg_9.0_tip_1   | 1.11E-57    | 437  | 4138 | 301772256 |
| 1 | 61080 length 411 cvg_7.9_tip_1   | 2.71E-16    | 411  | 103  | 301755352 |
| 1 | 66886 length 577 cvg_9.0_tip_1   | 5.07E-30    | 577  | 830  | 301758942 |
| 1 | 59882 length 389 cvg_6.1_tip_1   | 2.10E-40    | 389  | 592  | 301791431 |

|   |                                  |             |      |      |           |
|---|----------------------------------|-------------|------|------|-----------|
| 1 | 66156 length 547 cvg_9.0_tip_1   | 8.35E-35    | 547  | 309  | 73968303  |
| 1 | 70684 length 847 cvg_9.5_tip_1   | 3.48E-21    | 847  | 2971 | 301775003 |
| 1 | 62500 length 440 cvg_8.0_tip_1   | 1.36472E-15 | 440  | 1405 | 301767450 |
| 1 | 70598 length 836 cvg_8.0_tip_1   | 6.59E-17    | 836  | 1405 | 301767450 |
| 1 | 60506 length 400 cvg_9.0_tip_1   | 3.7992E-13  | 400  | 4024 | 301773304 |
| 1 | 60872 length 407 cvg_7.0_tip_1   | 4.45125E-14 | 407  | 220  | 297273977 |
| 1 | 59922 length 390 cvg_7.0_tip_1   | 1.54188E-08 | 390  | 232  | 297285351 |
| 1 | 73516 length 2096 cvg_16.0_tip_1 | 1.22544E-15 | 2096 | 362  | 71423181  |
| 1 | 59070 length 376 cvg_8.0_tip_1   | 1.40E-23    | 376  | 705  | 297279341 |
| 1 | 66276 length 552 cvg_9.0_tip_1   | 1.03E-42    | 552  | 6725 | 301773066 |
| 1 | 68262 length 643 cvg_5.0_tip_1   | 1.35E-62    | 643  | 376  | 301766408 |
| 1 | 65816 length 536 cvg_9.9_tip_1   | 5.1372E-12  | 536  | 354  | 301785602 |
| 1 | 62978 length 452 cvg_4.0_tip_1   | 1.87E-20    | 452  | 1004 | 301784160 |
| 1 | 62654 length 444 cvg_8.0_tip_1   | 2.68E-27    | 444  | 316  | 311246463 |
| 1 | 72210 length 1116 cvg_10.0_tip_1 | 6.25655E-09 | 1116 | 439  | 218675770 |
| 1 | 58848 length 372 cvg_7.0_tip_1   | 4.36E-25    | 372  | 5172 | 301772840 |
| 1 | 64448 length 493 cvg_7.2_tip_1   | 2.24E-19    | 493  | 188  | 291385975 |
| 1 | 72376 length 1164 cvg_8.0_tip_1  | 5.66E-109   | 1164 | 833  | 301763551 |
| 1 | 62004 length 429 cvg_7.0_tip_1   | 6.44813E-13 | 429  | 343  | 301775304 |
| 1 | 67762 length 616 cvg_8.0_tip_1   | 1.71E-24    | 616  | 304  | 301768443 |
| 1 | 66040 length 543 cvg_8.3_tip_1   | 5.93E-18    | 543  | 108  | 326928055 |
| 1 | 66314 length 553 cvg_7.0_tip_1   | 3.35E-17    | 553  | 491  | 311272317 |
| 1 | 62462 length 439 cvg_9.0_tip_1   | 2.84562E-13 | 439  | 578  | 301776496 |
| 1 | 62828 length 448 cvg_9.0_tip_1   | 1.18505E-06 | 448  | 578  | 301776496 |
| 1 | 71176 length 919 cvg_9.0_tip_1   | 1.79E-29    | 919  | 345  | 301779403 |
| 1 | 70412 length 810 cvg_10.0_tip_1  | 2.86E-70    | 810  | 749  | 119624875 |
| 1 | 70722 length 852 cvg_10.0_tip_1  | 5.58E-136   | 852  | 784  | 301767096 |
| 1 | 73076 length 1497 cvg_8.0_tip_1  | 5.15E-156   | 1497 | 784  | 301767096 |
| 1 | 69006 length 693 cvg_6.0_tip_1   | 8.04127E-14 | 693  | 156  | 297299319 |
| 1 | 61600 length 421 cvg_5.0_tip_1   | 1.44861E-12 | 421  | 1093 | 301758535 |
| 1 | 68948 length 688 cvg_5.0_tip_1   | 2.37072E-10 | 688  | 1093 | 301758535 |
| 1 | 55768 length 327 cvg_10.0_tip_1  | 6.87249E-15 | 327  | 2659 | 301783855 |
| 1 | 57686 length 353 cvg_6.0_tip_1   | 1.48905E-09 | 353  | 2579 | 297288028 |
| 1 | 71496 length 963 cvg_9.0_tip_1   | 4.67E-63    | 963  | 714  | 297485987 |
| 1 | 65064 length 511 cvg_12.0_tip_1  | 4.72651E-14 | 511  | 1359 | 297490529 |
| 1 | 59590 length 385 cvg_5.0_tip_1   | 3.40039E-06 | 385  | 364  | 73983148  |
| 1 | 68724 length 673 cvg_9.5_tip_1   | 4.98E-26    | 673  | 358  | 74012949  |
| 1 | 73058 length 1485 cvg_9.0_tip_1  | 3.82191E-10 | 1485 | 726  | 301770237 |
| 1 | 72564 length 1231 cvg_9.0_tip_1  | 2.74472E-08 | 1231 | 712  | 73966616  |
| 1 | 72634 length 1249 cvg_9.3_tip_1  | 2.81E-52    | 1249 | 248  | 48145663  |
| 1 | 64274 length 488 cvg_3.0_tip_1   | 1.82751E-07 | 488  | 140  | 73984512  |
| 1 | 55670 length 326 cvg_6.0_tip_1   | 1.7583E-10  | 326  | 1723 | 293350725 |
| 1 | 60208 length 395 cvg_4.0_tip_1   | 9.76276E-09 | 395  | 1931 | 311115255 |
| 1 | 68436 length 652 cvg_8.6_tip_1   | 2.12864E-10 | 652  | 1683 | 224042629 |
| 1 | 65076 length 512 cvg_4.2_tip_1   | 6.67E-16    | 512  | 764  | 253769266 |
| 1 | 67080 length 585 cvg_4.9_tip_1   | 6.77649E-08 | 585  | 324  | 73964590  |
| 1 | 63348 length 462 cvg_5.0_tip_1   | 5.20492E-07 | 462  | 279  | 73964644  |
| 1 | 64466 length 493 cvg_6.8_tip_1   | 3.39E-30    | 493  | 278  | 194214025 |

|   |                                  |             |      |      |           |
|---|----------------------------------|-------------|------|------|-----------|
| 1 | 58070 length 359 cvg_6.0_tip_1   | 2.36E-34    | 359  | 1275 | 2981631   |
| 1 | 56992 length 344 cvg_4.9_tip_1   | 5.38E-44    | 344  | 1275 | 74007557  |
| 1 | 53630 length 302 cvg_5.0_tip_1   | 2.86E-37    | 302  | 1274 | 73976474  |
| 1 | 63000 length 452 cvg_8.0_tip_1   | 1.63E-24    | 452  | 1273 | 73975969  |
| 1 | 55476 length 323 cvg_10.0_tip_1  | 2.81E-16    | 323  | 436  | 74008932  |
| 1 | 59390 length 382 cvg_6.6_tip_1   | 4.62E-49    | 382  | 812  | 74007908  |
| 1 | 71016 length 895 cvg_10.9_tip_1  | 3.79E-20    | 895  | 1272 | 148645276 |
| 1 | 66660 length 567 cvg_8.0_tip_1   | 1.30E-36    | 567  | 1207 | 74007516  |
| 1 | 62926 length 451 cvg_12.8_tip_1  | 1.44E-20    | 451  | 868  | 73983475  |
| 1 | 68566 length 662 cvg_7.0_tip_1   | 2.04E-40    | 662  | 1275 | 73973846  |
| 1 | 57152 length 346 cvg_5.0_tip_1   | 3.81E-45    | 346  | 1031 | 73979343  |
| 1 | 57936 length 357 cvg_3.9_tip_1   | 3.05E-41    | 357  | 1031 | 73979343  |
| 1 | 68038 length 631 cvg_7.1_tip_0   | 1.60E-19    | 631  | 217  | 73970577  |
| 1 | 68176 length 638 cvg_8.0_tip_1   | 5.49E-101   | 638  | 311  | 73998911  |
| 1 | 66468 length 559 cvg_18.0_tip_1  | 3.47E-37    | 559  | 369  | 73962430  |
| 1 | 54900 length 316 cvg_5.0_tip_1   | 6.50E-29    | 316  | 283  | 38512108  |
| 1 | 66152 length 547 cvg_8.0_tip_1   | 2.38E-20    | 547  | 846  | 194209149 |
| 1 | 57032 length 344 cvg_10.0_tip_1  | 1.23E-27    | 344  | 2054 | 281340843 |
| 1 | 59770 length 388 cvg_8.0_tip_1   | 1.92E-18    | 388  | 1256 | 194218860 |
| 1 | 62474 length 440 cvg_8.0_tip_1   | 7.37E-56    | 440  | 306  | 47576581  |
| 1 | 68970 length 690 cvg_5.0_tip_1   | 7.53E-30    | 690  | 311  | 297692107 |
| 1 | 56530 length 337 cvg_10.0_tip_1  | 5.03E-38    | 337  | 345  | 57114113  |
| 1 | 67040 length 583 cvg_8.0_tip_1   | 2.70E-18    | 583  | 2776 | 194215380 |
| 1 | 67840 length 619 cvg_8.0_tip_1   | 1.70E-27    | 619  | 2960 | 291390058 |
| 1 | 66074 length 544 cvg_6.5_tip_1   | 3.06913E-09 | 544  | 785  | 7021933   |
| 1 | 69110 length 699 cvg_5.0_tip_1   | 7.44178E-07 | 699  | 827  | 311275908 |
| 1 | 60822 length 406 cvg_9.6_tip_1   | 7.64161E-06 | 406  | 847  | 74008523  |
| 1 | 68824 length 681 cvg_5.0_tip_1   | 2.64859E-14 | 681  | 1716 | 301755346 |
| 1 | 60384 length 398 cvg_5.0_tip_1   | 3.45025E-14 | 398  | 1483 | 126337051 |
| 1 | 61278 length 414 cvg_9.0_tip_1   | 6.81082E-15 | 414  | 399  | 291386685 |
| 1 | 73250 length 1648 cvg_10.0_tip_1 | 6.49E-22    | 1648 | 1101 | 281347334 |
| 1 | 64620 length 498 cvg_8.0_tip_1   | 4.00E-27    | 498  | 350  | 301772234 |
| 1 | 68094 length 634 cvg_7.9_tip_1   | 1.78E-36    | 634  | 376  | 301766408 |
| 1 | 63766 length 473 cvg_6.9_tip_1   | 6.49495E-10 | 473  | 1275 | 2981631   |
| 1 | 66274 length 552 cvg_5.0_tip_1   | 6.57228E-10 | 552  | 1384 | 73964662  |
| 1 | 66206 length 549 cvg_8.0_tip_1   | 6.41803E-08 | 549  | 88   | 281354217 |
| 1 | 67914 length 622 cvg_8.0_tip_1   | 1.6729E-06  | 622  | 103  | 296238245 |
| 1 | 64986 length 509 cvg_5.0_tip_1   | 2.14E-25    | 509  | 1272 | 148645276 |
| 1 | 72422 length 1176 cvg_11.0_tip_1 | 2.09E-26    | 1176 | 381  | 281339729 |
| 1 | 54150 length 308 cvg_6.0_tip_1   | 4.42293E-06 | 308  | 1887 | 302838799 |
| 1 | 64816 length 504 cvg_8.0_tip_1   | 6.78682E-07 | 504  | 929  | 73994669  |
| 1 | 66146 length 547 cvg_5.9_tip_1   | 1.059E-07   | 547  | 929  | 73994669  |
| 1 | 56636 length 339 cvg_10.9_tip_1  | 2.10247E-07 | 339  | 183  | 297250762 |
| 1 | 54452 length 311 cvg_6.0_tip_1   | 9.09873E-15 | 311  | 97   | 293343516 |
| 1 | 54566 length 312 cvg_57.0_tip_0  | 1.04886E-07 | 312  | 1025 | 74007488  |
| 1 | 63350 length 462 cvg_9.0_tip_1   | 2.73E-19    | 462  | 1046 | 301756943 |
| 1 | 66110 length 545 cvg_7.8_tip_1   | 1.54027E-06 | 545  | 1275 | 2072951   |
| 1 | 71984 length 1062 cvg_8.0_tip_1  | 6.70E-31    | 1062 | 1344 | 73999461  |

|   |                                 |             |     |      |           |
|---|---------------------------------|-------------|-----|------|-----------|
| 1 | 70978 length 891 cvg_11.4_tip_1 | 3.08E-43    | 891 | 730  | 74007942  |
| 1 | 68904 length 686 cvg_9.0_tip_1  | 9.00872E-10 | 686 | 280  | 196010894 |
| 1 | 59970 length 391 cvg_4.0_tip_1  | 1.01736E-10 | 391 | 127  | 296315063 |
| 1 | 65600 length 528 cvg_7.0_tip_1  | 6.76E-43    | 528 | 1344 | 73999461  |
| 1 | 61192 length 412 cvg_5.0_tip_1  | 8.91587E-07 | 412 | 1272 | 73974662  |
| 1 | 66190 length 548 cvg_8.0_tip_1  | 5.71E-40    | 548 | 183  | 297250762 |
| 1 | 69512 length 728 cvg_6.0_tip_1  | 2.13E-23    | 728 | 1344 | 73971897  |
| 1 | 58894 length 373 cvg_2.9_tip_1  | 3.53E-17    | 373 | 1402 | 74011366  |
| 1 | 67296 length 595 cvg_8.0_tip_1  | 2.67E-24    | 595 | 1275 | 2981631   |
| 1 | 67516 length 604 cvg_10.0_tip_1 | 2.36E-23    | 604 | 1275 | 2981631   |
| 1 | 69810 length 750 cvg_5.0_tip_1  | 1.34E-34    | 750 | 1272 | 148645276 |
| 1 | 58036 length 359 cvg_5.0_tip_1  | 7.58852E-06 | 359 | 128  | 281354416 |
| 1 | 59992 length 391 cvg_6.0_tip_1  | 6.37233E-13 | 391 | 347  | 51339393  |
| 1 | 63374 length 462 cvg_10.0_tip_1 | 1.71E-50    | 462 | 606  | 262188108 |
| 1 | 70060 length 773 cvg_9.0_tip_1  | 5.69E-17    | 773 | 98   | 159524419 |
| 1 | 63340 length 462 cvg_7.0_tip_1  | 2.55E-26    | 462 | 1079 | 74006100  |

---
