# Supplementary material for: Genome Analysis of the Domestic Dog (Korean Jindo) by Massively Parallel Sequencing
Source: PubMed Central journal article supplement — DNA Res. 2012 Apr 3;19(3):275–88. doi: 10.1093/dnares/dss011 (PMC3372376; doi:10.1093/dnares/dss011), 2012-04-03
Supplement: supp_dss011_dss011supp_table4.pdf [file supp_dss011_dss011supp_table4.pdf]

Supplementary Table 4. 991 contigs (derived from unmapped reads) were matched to the EST database (human, mouse and others)

| rank | contig_id                        | pscore      | query_length | target_length | target_accession |
|------|----------------------------------|-------------|--------------|---------------|------------------|
| 1    | 72252 length 1127 cvg_7.6_tip_1  | 3.84195E-11 | 1127         | 559           | 5394589          |
| 1    | 60550 length 401 cvg_3.0_tip_1   | 2.22E-16    | 401          | 471           | 90842973         |
| 1    | 54260 length 309 cvg_8.2_tip_1   | 1.50427E-07 | 309          | 568           | 83264405         |
| 1    | 64934 length 508 cvg_6.0_tip_1   | 1.09E-49    | 508          | 325           | 24808385         |
| 1    | 68292 length 644 cvg_6.0_tip_1   | 7.23E-107   | 644          | 383           | 37795726         |
| 1    | 60584 length 401 cvg_6.0_tip_1   | 1.43E-17    | 401          | 541           | 182571748        |
| 1    | 66840 length 574 cvg_5.0_tip_1   | 2.23E-23    | 574          | 549           | 83103410         |
| 1    | 65484 length 525 cvg_8.9_tip_1   | 2.72726E-10 | 525          | 740           | 60433614         |
| 1    | 56280 length 334 cvg_9.0_tip_1   | 1.17E-17    | 334          | 677           | 8164824          |
| 1    | 67874 length 621 cvg_9.0_tip_1   | 5.07184E-09 | 621          | 736           | 288247254        |
| 1    | 59162 length 378 cvg_7.0_tip_1   | 5.49E-20    | 378          | 549           | 288309227        |
| 1    | 62614 length 443 cvg_6.0_tip_1   | 1.54E-51    | 443          | 834           | 112226981        |
| 1    | 69622 length 737 cvg_9.0_tip_1   | 6.10E-46    | 737          | 741           | 60575946         |
| 1    | 72062 length 1081 cvg_11.0_tip_1 | 7.49E-31    | 1081         | 352           | 17890006         |
| 1    | 56470 length 336 cvg_10.0_tip_1  | 1.22E-165   | 336          | 564           | 50443307         |
| 1    | 66180 length 548 cvg_7.0_tip_1   | 1.12695E-09 | 548          | 668           | 45768051         |
| 1    | 68888 length 685 cvg_9.0_tip_1   | 8.76524E-08 | 685          | 727           | 60441042         |
| 1    | 60580 length 401 cvg_8.3_tip_1   | 9.48E-22    | 401          | 245           | 282740563        |
| 1    | 72546 length 1223 cvg_9.0_tip_1  | 1.01776E-08 | 1223         | 428           | 282760759        |
| 1    | 73252 length 1650 cvg_10.7_tip_1 | 1.67E-23    | 1650         | 480           | 282742657        |
| 1    | 72160 length 1104 cvg_9.0_tip_1  | 1.30E-72    | 1104         | 503           | 199587855        |
| 1    | 55992 length 329 cvg_8.0_tip_1   | 1.03072E-08 | 329          | 769           | 30757753         |
| 1    | 59926 length 390 cvg_7.0_tip_1   | 1.92882E-07 | 390          | 556           | 60561116         |
| 1    | 72198 length 1113 cvg_6.0_tip_1  | 2.25306E-06 | 1113         | 671           | 60436615         |
| 1    | 67648 length 611 cvg_9.0_tip_1   | 0           | 611          | 653           | 119262662        |
| 1    | 59020 length 375 cvg_6.0_tip_1   | 1.37E-165   | 375          | 422           | 104298275        |
| 1    | 53924 length 305 cvg_3.0_tip_1   | 9.14937E-06 | 305          | 670           | 112775079        |
| 1    | 71462 length 958 cvg_5.0_tip_1   | 4.93E-44    | 958          | 751           | 84588257         |
| 1    | 65166 length 515 cvg_6.1.0_tip_1 | 5.31E-101   | 515          | 900           | 84586140         |
| 1    | 69170 length 702 cvg_8.0_tip_1   | 7.22E-27    | 702          | 710           | 148274761        |
| 1    | 67882 length 621 cvg_6.0_tip_1   | 2.02E-45    | 621          | 697           | 302100617        |
| 1    | 71848 length 1028 cvg_5.0_tip_1  | 2.63E-61    | 1028         | 722           | 82959722         |
| 1    | 60000 length 391 cvg_4.0_tip_1   | 0           | 391          | 842           | 84584040         |
| 1    | 56096 length 331 cvg_5.0_tip_1   | 5.34E-29    | 331          | 523           | 47438508         |
| 1    | 61238 length 413 cvg_4.0_tip_1   | 6.76E-29    | 413          | 738           | 60993011         |
| 1    | 61556 length 420 cvg_5.0_tip_1   | 1.82E-69    | 420          | 564           | 83224081         |
| 1    | 61738 length 424 cvg_4.0_tip_1   | 0           | 424          | 681           | 62136384         |
| 1    | 62732 length 446 cvg_4.0_tip_1   | 3.88544E-15 | 446          | 471           | 80893274         |
| 1    | 67412 length 599 cvg_5.0_tip_1   | 3.92E-28    | 599          | 798           | 190270082        |
| 1    | 65902 length 538 cvg_6.0_tip_1   | 1.72581E-08 | 538          | 767           | 67564902         |
| 1    | 61378 length 416 cvg_5.0_tip_1   | 1.19E-36    | 416          | 493           | 183087483        |
| 1    | 66028 length 543 cvg_8.0_tip_1   | 5.33E-24    | 543          | 460           | 154813123        |
| 1    | 63756 length 473 cvg_10.0_tip_1  | 6.55E-88    | 473          | 567           | 18820869         |
| 1    | 69212 length 705 cvg_11.0_tip_0  | 9.45E-48    | 705          | 696           | 60614609         |
| 1    | 69294 length 710 cvg_9.5_tip_0   | 9.89E-51    | 710          | 692           | 56276599         |

|   |                                  |             |      |     |           |
|---|----------------------------------|-------------|------|-----|-----------|
| 1 | 56190 length 333 cvg_4.0_tip_1   | 1.06E-82    | 333  | 759 | 60613503  |
| 1 | 57208 length 347 cvg_5.7_tip_0   | 4.31127E-08 | 347  | 368 | 183979923 |
| 1 | 70990 length 892 cvg_9.0_tip_1   | 0           | 892  | 806 | 56392024  |
| 1 | 54000 length 306 cvg_8.0_tip_1   | 3.17E-67    | 306  | 861 | 302095434 |
| 1 | 67318 length 596 cvg_5.8_tip_1   | 1.64E-141   | 596  | 784 | 60626460  |
| 1 | 56578 length 338 cvg_8.6_tip_1   | 5.46E-29    | 338  | 640 | 62137366  |
| 1 | 57650 length 353 cvg_8.0_tip_1   | 1.34E-23    | 353  | 640 | 62137366  |
| 1 | 59442 length 382 cvg_9.0_tip_1   | 3.29896E-15 | 382  | 629 | 156184186 |
| 1 | 65082 length 512 cvg_6.9_tip_1   | 1.04967E-09 | 512  | 629 | 156184186 |
| 1 | 67250 length 592 cvg_7.0_tip_1   | 4.82588E-09 | 592  | 561 | 104302307 |
| 1 | 73208 length 1591 cvg_7.0_tip_1  | 2.07612E-07 | 1591 | 330 | 157989902 |
| 1 | 73284 length 1692 cvg_7.0_tip_1  | 2.38318E-13 | 1692 | 188 | 104301096 |
| 1 | 73768 length 4188 cvg_7.8_tip_1  | 6.16E-16    | 4188 | 640 | 62137366  |
| 1 | 54384 length 310 cvg_17.0_tip_1  | 4.61E-23    | 310  | 806 | 23703746  |
| 1 | 54630 length 313 cvg_6.0_tip_1   | 7.01E-19    | 313  | 606 | 18824030  |
| 1 | 56940 length 343 cvg_6.0_tip_1   | 4.25821E-08 | 343  | 693 | 60435609  |
| 1 | 57488 length 351 cvg_6.0_tip_1   | 5.68E-29    | 351  | 664 | 45765337  |
| 1 | 70040 length 772 cvg_8.0_tip_1   | 7.39E-21    | 772  | 613 | 60561268  |
| 1 | 64476 length 494 cvg_7.2_tip_1   | 3.33E-31    | 494  | 403 | 60640686  |
| 1 | 71576 length 978 cvg_8.6_tip_1   | 2.12885E-12 | 978  | 743 | 62848333  |
| 1 | 58340 length 364 cvg_8.0_tip_1   | 1.44E-26    | 364  | 660 | 60638418  |
| 1 | 53708 length 303 cvg_4.0_tip_1   | 1.52949E-10 | 303  | 894 | 34413961  |
| 1 | 53936 length 305 cvg_5.0_tip_1   | 1.29E-32    | 305  | 433 | 60559745  |
| 1 | 60614 length 402 cvg_7.0_tip_1   | 1.60E-26    | 402  | 636 | 302107841 |
| 1 | 63592 length 468 cvg_10.5_tip_1  | 2.72E-19    | 468  | 536 | 20071541  |
| 1 | 66800 length 573 cvg_5.0_tip_1   | 1.22604E-12 | 573  | 674 | 259802214 |
| 1 | 71466 length 958 cvg_9.0_tip_1   | 5.07966E-10 | 958  | 358 | 50710163  |
| 1 | 61314 length 415 cvg_49.0_tip_1  | 1.75E-103   | 415  | 538 | 20429839  |
| 1 | 61790 length 425 cvg_7.0_tip_1   | 8.10E-41    | 425  | 538 | 20429839  |
| 1 | 64486 length 494 cvg_6.0_tip_1   | 1.70216E-14 | 494  | 372 | 50514717  |
| 1 | 65278 length 519 cvg_6.0_tip_1   | 1.64E-116   | 519  | 811 | 23694334  |
| 1 | 70704 length 849 cvg_4.0_tip_1   | 4.66016E-13 | 849  | 904 | 45760654  |
| 1 | 59840 length 389 cvg_6.0_tip_1   | 8.51E-16    | 389  | 715 | 62851158  |
| 1 | 61100 length 411 cvg_8.0_tip_1   | 8.36585E-10 | 411  | 773 | 34409249  |
| 1 | 53586 length 302 cvg_9.0_tip_1   | 1.42E-41    | 302  | 799 | 67564050  |
| 1 | 58710 length 370 cvg_3.9_tip_1   | 9.39E-28    | 370  | 724 | 62839303  |
| 1 | 60320 length 396 cvg_5.0_tip_1   | 6.71E-32    | 396  | 528 | 56274902  |
| 1 | 60500 length 400 cvg_7.0_tip_1   | 1.72E-32    | 400  | 683 | 60572996  |
| 1 | 60876 length 407 cvg_7.0_tip_1   | 9.27E-19    | 407  | 714 | 62841705  |
| 1 | 61436 length 417 cvg_4.0_tip_1   | 1.54E-20    | 417  | 799 | 34410677  |
| 1 | 64632 length 498 cvg_3.0_tip_1   | 2.67987E-13 | 498  | 580 | 60541709  |
| 1 | 64786 length 503 cvg_6.0_tip_1   | 7.12E-17    | 503  | 416 | 60636041  |
| 1 | 65330 length 520 cvg_7.0_tip_1   | 8.25E-26    | 520  | 552 | 60564783  |
| 1 | 70098 length 777 cvg_8.0_tip_1   | 4.25394E-13 | 777  | 363 | 104301931 |
| 1 | 71110 length 909 cvg_10.0_tip_1  | 9.79E-30    | 909  | 511 | 60523677  |
| 1 | 71798 length 1021 cvg_9.0_tip_1  | 1.10E-29    | 1021 | 650 | 60641094  |
| 1 | 72682 length 1261 cvg_44.1_tip_1 | 1.84E-16    | 1261 | 416 | 60636041  |
| 1 | 72712 length 1277 cvg_6.8_tip_1  | 6.81273E-10 | 1277 | 363 | 104301931 |

|   |                                 |             |      |      |           |
|---|---------------------------------|-------------|------|------|-----------|
| 1 | 72898 length 1381 cvg_7.0_tip_1 | 2.01E-16    | 1381 | 416  | 60636041  |
| 1 | 64584 length 497 cvg_8.0_tip_1  | 4.68E-21    | 497  | 602  | 60558681  |
| 1 | 61680 length 423 cvg_4.0_tip_1  | 1.01E-58    | 423  | 647  | 302109432 |
| 1 | 66066 length 544 cvg_6.0_tip_1  | 8.40E-60    | 544  | 692  | 302079446 |
| 1 | 53450 length 301 cvg_7.0_tip_1  | 6.82E-93    | 301  | 600  | 302069047 |
| 1 | 55326 length 321 cvg_7.4_tip_1  | 4.00E-45    | 321  | 484  | 288263857 |
| 1 | 58960 length 374 cvg_8.2_tip_0  | 4.60E-116   | 374  | 708  | 60632109  |
| 1 | 59306 length 380 cvg_7.0_tip_1  | 3.87E-101   | 380  | 653  | 60634308  |
| 1 | 61334 length 415 cvg_6.5_tip_1  | 7.72E-112   | 415  | 674  | 56397609  |
| 1 | 64712 length 501 cvg_8.2_tip_1  | 4.12E-83    | 501  | 708  | 60632109  |
| 1 | 70004 length 768 cvg_5.5_tip_1  | 1.13E-127   | 768  | 613  | 56275444  |
| 1 | 54848 length 316 cvg_6.0_tip_1  | 8.36E-105   | 316  | 683  | 86248488  |
| 1 | 56272 length 334 cvg_9.0_tip_1  | 3.38E-101   | 334  | 674  | 56397609  |
| 1 | 60992 length 409 cvg_7.0_tip_0  | 2.09E-155   | 409  | 722  | 67567098  |
| 1 | 53972 length 306 cvg_10.0_tip_0 | 5.13E-69    | 306  | 650  | 45762149  |
| 1 | 55626 length 325 cvg_3.0_tip_1  | 8.62E-105   | 325  | 810  | 60615696  |
| 1 | 57928 length 357 cvg_7.0_tip_1  | 7.95E-127   | 357  | 722  | 67567098  |
| 1 | 61518 length 419 cvg_6.8_tip_1  | 7.02E-140   | 419  | 582  | 60635076  |
| 1 | 62432 length 439 cvg_4.0_tip_1  | 9.31308E-13 | 439  | 748  | 29512960  |
| 1 | 64170 length 484 cvg_7.7_tip_1  | 1.69E-88    | 484  | 752  | 67565034  |
| 1 | 66916 length 578 cvg_9.0_tip_1  | 1.20E-46    | 578  | 379  | 302093005 |
| 1 | 66988 length 581 cvg_7.0_tip_1  | 2.17E-20    | 581  | 502  | 28575075  |
| 1 | 67638 length 610 cvg_10.0_tip_1 | 2.07E-85    | 610  | 608  | 56272751  |
| 1 | 69098 length 698 cvg_11.7_tip_0 | 1.10E-133   | 698  | 674  | 56397609  |
| 1 | 66710 length 569 cvg_7.0_tip_1  | 3.81E-139   | 569  | 708  | 60632109  |
| 1 | 66918 length 578 cvg_8.0_tip_1  | 0           | 578  | 722  | 67567098  |
| 1 | 70624 length 840 cvg_9.0_tip_1  | 6.10E-108   | 840  | 742  | 56396150  |
| 1 | 58590 length 368 cvg_8.0_tip_1  | 2.03E-16    | 368  | 1338 | 82643395  |
| 1 | 59326 length 381 cvg_5.0_tip_1  | 6.25E-66    | 381  | 751  | 67563076  |
| 1 | 60830 length 406 cvg_9.0_tip_1  | 2.96E-74    | 406  | 652  | 60631887  |
| 1 | 61944 length 428 cvg_9.0_tip_1  | 8.47E-44    | 428  | 749  | 108837688 |
| 1 | 64022 length 480 cvg_7.0_tip_1  | 1.38E-36    | 480  | 617  | 84582449  |
| 1 | 72010 length 1065 cvg_9.0_tip_1 | 1.30E-75    | 1065 | 653  | 60634308  |
| 1 | 54300 length 309 cvg_6.0_tip_1  | 2.86E-58    | 309  | 750  | 60632129  |
| 1 | 60220 length 395 cvg_7.9_tip_1  | 7.33E-112   | 395  | 801  | 60626147  |
| 1 | 60206 length 395 cvg_5.9_tip_1  | 3.47E-89    | 395  | 689  | 84581459  |
| 1 | 57260 length 348 cvg_12.0_tip_0 | 1.8427E-13  | 348  | 579  | 120440460 |
| 1 | 62532 length 441 cvg_9.3_tip_1  | 1.79E-100   | 441  | 784  | 60626460  |
| 1 | 68302 length 644 cvg_12.0_tip_1 | 3.45E-121   | 644  | 751  | 60635042  |
| 1 | 62302 length 436 cvg_8.0_tip_1  | 1.38996E-08 | 436  | 561  | 104302307 |
| 1 | 71534 length 970 cvg_8.0_tip_1  | 9.34E-21    | 970  | 761  | 67567051  |
| 1 | 71784 length 1019 cvg_8.0_tip_1 | 8.13443E-06 | 1019 | 561  | 104302307 |
| 1 | 71928 length 1048 cvg_5.9_tip_1 | 3.85E-17    | 1048 | 761  | 67567051  |
| 1 | 65590 length 528 cvg_9.0_tip_1  | 1.04385E-06 | 528  | 591  | 60572384  |
| 1 | 53968 length 306 cvg_9.0_tip_1  | 1.80E-22    | 306  | 406  | 229719654 |
| 1 | 68562 length 662 cvg_16.4_tip_1 | 1.44E-49    | 662  | 722  | 60436051  |
| 1 | 55260 length 320 cvg_5.0_tip_1  | 1.47E-75    | 320  | 559  | 18817327  |
| 1 | 59564 length 385 cvg_6.0_tip_1  | 2.25E-93    | 385  | 596  | 60559847  |

|   |                                 |             |      |     |           |
|---|---------------------------------|-------------|------|-----|-----------|
| 1 | 53724 length 303 cvg_4.0_tip_1  | 3.11E-30    | 303  | 280 | 104297801 |
| 1 | 53994 length 306 cvg_6.6_tip_1  | 2.17E-37    | 306  | 684 | 60557572  |
| 1 | 58466 length 366 cvg_6.9_tip_1  | 3.81E-30    | 366  | 280 | 104297801 |
| 1 | 59680 length 386 cvg_5.0_tip_1  | 1.48E-23    | 386  | 402 | 104302202 |
| 1 | 65848 length 537 cvg_6.0_tip_1  | 5.68E-30    | 537  | 867 | 60574659  |
| 1 | 66990 length 581 cvg_5.0_tip_1  | 6.16E-30    | 581  | 650 | 60641094  |
| 1 | 72666 length 1258 cvg_8.0_tip_1 | 1.27E-23    | 1258 | 402 | 104302202 |
| 1 | 72680 length 1261 cvg_8.4_tip_1 | 4.65E-17    | 1261 | 402 | 104302202 |
| 1 | 73272 length 1679 cvg_6.6_tip_1 | 6.70E-23    | 1679 | 402 | 104302202 |
| 1 | 73306 length 1723 cvg_8.0_tip_1 | 1.67E-20    | 1723 | 402 | 104302202 |
| 1 | 73570 length 2229 cvg_6.5_tip_1 | 3.52E-22    | 2229 | 402 | 104302202 |
| 1 | 70026 length 770 cvg_6.0_tip_1  | 3.65E-38    | 770  | 602 | 16319283  |
| 1 | 53324 length 300 cvg_6.0_tip_1  | 4.80E-29    | 300  | 565 | 21996762  |
| 1 | 55200 length 320 cvg_4.0_tip_1  | 4.96E-26    | 320  | 457 | 60571251  |
| 1 | 62182 length 433 cvg_7.0_tip_1  | 1.80E-29    | 433  | 678 | 60436393  |
| 1 | 67392 length 598 cvg_7.0_tip_1  | 1.23427E-09 | 598  | 732 | 62848659  |
| 1 | 70050 length 773 cvg_9.0_tip_1  | 1.60992E-09 | 773  | 528 | 50516371  |
| 1 | 71026 length 898 cvg_7.6_tip_1  | 2.74E-39    | 898  | 469 | 60522018  |
| 1 | 66378 length 556 cvg_9.0_tip_1  | 2.71E-41    | 556  | 437 | 104296685 |
| 1 | 54552 length 312 cvg_6.0_tip_1  | 2.06E-31    | 312  | 697 | 62137004  |
| 1 | 54628 length 312 cvg_4.0_tip_1  | 8.76E-37    | 312  | 771 | 60622364  |
| 1 | 57312 length 348 cvg_6.1_tip_1  | 1.70868E-07 | 348  | 578 | 50450655  |
| 1 | 57674 length 353 cvg_8.0_tip_1  | 6.45E-75    | 353  | 506 | 18819577  |
| 1 | 58430 length 365 cvg_3.8_tip_1  | 2.62E-37    | 365  | 499 | 18821599  |
| 1 | 59662 length 386 cvg_7.0_tip_1  | 4.72E-79    | 386  | 688 | 60433306  |
| 1 | 61214 length 413 cvg_4.0_tip_1  | 1.78E-32    | 413  | 926 | 34408705  |
| 1 | 61958 length 428 cvg_6.0_tip_1  | 1.91E-35    | 428  | 682 | 60440120  |
| 1 | 63508 length 466 cvg_8.0_tip_1  | 2.81E-22    | 466  | 506 | 18819577  |
| 1 | 64086 length 482 cvg_3.9_tip_1  | 1.06255E-15 | 482  | 605 | 60582649  |
| 1 | 65476 length 525 cvg_7.4_tip_1  | 1.14E-86    | 525  | 506 | 18819577  |
| 1 | 66592 length 564 cvg_53.6_tip_1 | 4.66E-83    | 564  | 506 | 18819577  |
| 1 | 67284 length 595 cvg_11.6_tip_1 | 8.48E-17    | 595  | 612 | 60558315  |
| 1 | 68340 length 647 cvg_7.3_tip_1  | 2.43E-20    | 647  | 456 | 60439057  |
| 1 | 68620 length 666 cvg_32.3_tip_1 | 9.61E-54    | 666  | 505 | 13548265  |
| 1 | 68882 length 684 cvg_9.0_tip_1  | 1.03E-93    | 684  | 688 | 60435507  |
| 1 | 70044 length 772 cvg_7.6_tip_1  | 8.27E-30    | 772  | 651 | 62842110  |
| 1 | 70184 length 785 cvg_59.5_tip_0 | 6.81E-86    | 785  | 771 | 60622364  |
| 1 | 55218 length 320 cvg_5.0_tip_1  | 7.74E-25    | 320  | 875 | 46169599  |
| 1 | 58298 length 363 cvg_4.0_tip_1  | 1.33E-20    | 363  | 603 | 54474630  |
| 1 | 67238 length 592 cvg_5.0_tip_1  | 4.68E-43    | 592  | 889 | 154637111 |
| 1 | 69002 length 692 cvg_4.0_tip_1  | 1.25E-71    | 692  | 607 | 31942788  |
| 1 | 68152 length 637 cvg_15.0_tip_1 | 3.36E-47    | 637  | 789 | 60635271  |
| 1 | 53900 length 305 cvg_6.9_tip_1  | 1.19E-26    | 305  | 629 | 156184186 |
| 1 | 54202 length 308 cvg_8.0_tip_1  | 6.63E-16    | 308  | 557 | 60582757  |
| 1 | 54356 length 310 cvg_7.0_tip_1  | 6.43206E-13 | 310  | 452 | 50688224  |
| 1 | 54988 length 317 cvg_6.0_tip_1  | 4.91E-26    | 317  | 626 | 62889835  |
| 1 | 55534 length 324 cvg_11.2_tip_1 | 1.84E-19    | 324  | 666 | 60556663  |
| 1 | 57632 length 353 cvg_5.0_tip_1  | 1.34E-23    | 353  | 626 | 62889835  |

|   |                                  |             |      |     |           |
|---|----------------------------------|-------------|------|-----|-----------|
| 1 | 61288 length 414 cvg_13.1_tip_1  | 6.28E-23    | 414  | 330 | 157989902 |
| 1 | 69578 length 734 cvg_8.0_tip_1   | 1.64592E-15 | 734  | 557 | 60582757  |
| 1 | 69962 length 764 cvg_6.8_tip_1   | 1.65181E-12 | 764  | 165 | 116379049 |
| 1 | 71626 length 990 cvg_8.0_tip_1   | 2.70E-30    | 990  | 778 | 34407521  |
| 1 | 71728 length 1009 cvg_6.0_tip_1  | 9.01852E-15 | 1009 | 761 | 67562876  |
| 1 | 72146 length 1101 cvg_8.0_tip_1  | 7.63E-31    | 1101 | 672 | 60619057  |
| 1 | 72436 length 1179 cvg_7.0_tip_1  | 1.23E-26    | 1179 | 629 | 156184186 |
| 1 | 72630 length 1247 cvg_7.7_tip_1  | 8.34E-28    | 1247 | 748 | 67564722  |
| 1 | 73182 length 1559 cvg_7.2_tip_1  | 3.83E-21    | 1559 | 626 | 62889835  |
| 1 | 73242 length 1630 cvg_7.6_tip_1  | 7.01E-29    | 1630 | 799 | 62846608  |
| 1 | 73292 length 1704 cvg_8.0_tip_1  | 4.36E-24    | 1704 | 629 | 156184186 |
| 1 | 73694 length 2866 cvg_8.1_tip_1  | 7.64E-27    | 2866 | 629 | 156184186 |
| 1 | 55288 length 320 cvg_6.0_tip_1   | 1.89E-22    | 320  | 699 | 60558914  |
| 1 | 68570 length 662 cvg_8.0_tip_1   | 3.60513E-13 | 662  | 699 | 60558914  |
| 1 | 58084 length 359 cvg_8.0_tip_1   | 3.36E-58    | 359  | 262 | 45767440  |
| 1 | 63218 length 458 cvg_9.9_tip_1   | 6.53E-54    | 458  | 262 | 45767440  |
| 1 | 72820 length 1339 cvg_10.8_tip_1 | 8.57E-170   | 1339 | 662 | 60626428  |
| 1 | 70448 length 814 cvg_9.0_tip_1   | 1.21E-164   | 814  | 782 | 60613336  |
| 1 | 68696 length 671 cvg_9.0_tip_1   | 1.01E-93    | 671  | 450 | 20429912  |
| 1 | 65306 length 519 cvg_8.0_tip_1   | 2.46E-112   | 519  | 748 | 60631606  |
| 1 | 69356 length 717 cvg_5.8_tip_1   | 3.19E-106   | 717  | 721 | 67563446  |
| 1 | 59574 length 385 cvg_7.0_tip_1   | 6.09E-63    | 385  | 779 | 56398026  |
| 1 | 56078 length 331 cvg_6.0_tip_1   | 1.81E-16    | 331  | 751 | 62848051  |
| 1 | 62954 length 451 cvg_6.0_tip_1   | 9.22609E-10 | 451  | 751 | 62848051  |
| 1 | 68816 length 680 cvg_5.9_tip_1   | 2.20166E-08 | 680  | 888 | 84586283  |
| 1 | 54952 length 317 cvg_8.0_tip_1   | 1.87E-22    | 317  | 650 | 60641094  |
| 1 | 58846 length 372 cvg_4.0_tip_1   | 1.53E-29    | 372  | 732 | 62848659  |
| 1 | 59760 length 387 cvg_6.0_tip_1   | 7.55886E-07 | 387  | 111 | 67567690  |
| 1 | 62744 length 446 cvg_4.0_tip_1   | 1.53519E-14 | 446  | 111 | 67567690  |
| 1 | 66542 length 563 cvg_3.0_tip_1   | 3.04659E-13 | 563  | 111 | 67567690  |
| 1 | 68764 length 677 cvg_9.0_tip_1   | 6.70E-24    | 677  | 655 | 50523853  |
| 1 | 71974 length 1060 cvg_49.6_tip_1 | 1.72E-25    | 1060 | 655 | 50523853  |
| 1 | 72004 length 1064 cvg_9.0_tip_1  | 5.65554E-10 | 1064 | 111 | 67567690  |
| 1 | 67272 length 594 cvg_9.0_tip_1   | 2.23E-20    | 594  | 484 | 50633323  |
| 1 | 61938 length 428 cvg_4.0_tip_1   | 9.42E-16    | 428  | 716 | 60437339  |
| 1 | 73114 length 1519 cvg_7.6_tip_1  | 3.88E-24    | 1519 | 949 | 34413183  |
| 1 | 64902 length 507 cvg_10.0_tip_1  | 1.24E-132   | 507  | 801 | 60626147  |
| 1 | 54636 length 313 cvg_8.0_tip_1   | 3.86025E-08 | 313  | 791 | 23707203  |
| 1 | 71734 length 1009 cvg_9.4_tip_1  | 2.37E-18    | 1009 | 422 | 8908788   |
| 1 | 60352 length 397 cvg_8.0_tip_1   | 2.04113E-10 | 397  | 778 | 23289516  |
| 1 | 68482 length 656 cvg_10.0_tip_1  | 2.12124E-08 | 656  | 406 | 8907317   |
| 1 | 62400 length 438 cvg_4.0_tip_1   | 1.50622E-14 | 438  | 719 | 60637874  |
| 1 | 69986 length 766 cvg_9.0_tip_1   | 4.19188E-13 | 766  | 671 | 60437101  |
| 1 | 65044 length 511 cvg_5.0_tip_1   | 2.97E-19    | 511  | 563 | 84129686  |
| 1 | 66650 length 566 cvg_6.0_tip_1   | 1.31E-18    | 566  | 531 | 183028217 |
| 1 | 66782 length 572 cvg_5.0_tip_1   | 5.25E-55    | 572  | 850 | 84588792  |
| 1 | 71854 length 1029 cvg_5.0_tip_1  | 8.93E-49    | 1029 | 546 | 60513747  |
| 1 | 73486 length 2028 cvg_45.3_tip_1 | 8.28E-134   | 2028 | 792 | 84583450  |

|   |                                  |             |      |     |           |
|---|----------------------------------|-------------|------|-----|-----------|
| 1 | 73380 length 1833 cvg_10.0_tip_1 | 2.57822E-13 | 1833 | 669 | 56274988  |
| 1 | 68486 length 656 cvg_6.0_tip_1   | 6.48E-24    | 656  | 371 | 48724141  |
| 1 | 72156 length 1103 cvg_10.0_tip_1 | 9.15985E-09 | 1103 | 631 | 28289954  |
| 1 | 73614 length 2369 cvg_9.0_tip_1  | 3.89E-25    | 2369 | 277 | 60625579  |
| 1 | 65104 length 513 cvg_6.6_tip_1   | 1.70521E-11 | 513  | 521 | 83488801  |
| 1 | 66488 length 560 cvg_11.3_tip_0  | 7.66786E-14 | 560  | 702 | 29258978  |
| 1 | 54956 length 317 cvg_8.0_tip_1   | 9.9043E-09  | 317  | 547 | 49340311  |
| 1 | 65258 length 518 cvg_9.0_tip_1   | 7.34E-17    | 518  | 748 | 62839521  |
| 1 | 55082 length 318 cvg_11.0_tip_1  | 1.80E-19    | 318  | 851 | 119683006 |
| 1 | 73042 length 1474 cvg_6.9_tip_1  | 9.17E-22    | 1474 | 566 | 86224623  |
| 1 | 72734 length 1288 cvg_5.0_tip_1  | 1.73938E-10 | 1288 | 864 | 75787908  |
| 1 | 67452 length 601 cvg_5.6_tip_1   | 1.62E-30    | 601  | 457 | 60571251  |
| 1 | 64504 length 494 cvg_6.0_tip_1   | 1.01103E-09 | 494  | 719 | 40401817  |
| 1 | 58446 length 365 cvg_4.0_tip_1   | 4.55005E-08 | 365  | 307 | 86233888  |
| 1 | 66358 length 555 cvg_9.0_tip_1   | 4.86598E-15 | 555  | 614 | 74363469  |
| 1 | 72294 length 1141 cvg_10.3_tip_1 | 4.04037E-14 | 1141 | 653 | 60433803  |
| 1 | 73000 length 1444 cvg_5.0_tip_1  | 3.05027E-09 | 1444 | 129 | 178616792 |
| 1 | 53726 length 303 cvg_5.0_tip_1   | 4.68E-26    | 303  | 579 | 60560824  |
| 1 | 70196 length 786 cvg_10.0_tip_1  | 6.72026E-12 | 786  | 604 | 282744375 |
| 1 | 72978 length 1436 cvg_9.2_tip_1  | 1.34E-17    | 1436 | 740 | 60437760  |
| 1 | 71764 length 1014 cvg_5.0_tip_1  | 5.18442E-07 | 1014 | 556 | 81200863  |
| 1 | 62676 length 444 cvg_5.0_tip_1   | 1.52795E-14 | 444  | 667 | 183025254 |
| 1 | 72402 length 1172 cvg_9.0_tip_1  | 6.24228E-10 | 1172 | 272 | 20431398  |
| 1 | 70960 length 889 cvg_6.0_tip_1   | 1.14663E-07 | 889  | 529 | 19695691  |
| 1 | 73660 length 2585 cvg_10.0_tip_1 | 5.69813E-12 | 2585 | 774 | 31892390  |
| 1 | 58860 length 373 cvg_9.0_tip_1   | 1.22379E-11 | 373  | 672 | 40412790  |
| 1 | 55434 length 322 cvg_4.0_tip_1   | 6.45181E-10 | 322  | 684 | 29399077  |
| 1 | 66940 length 579 cvg_5.1_tip_1   | 1.8632E-08  | 579  | 387 | 59826354  |
| 1 | 72164 length 1105 cvg_7.0_tip_1  | 7.15E-62    | 1105 | 578 | 60557987  |
| 1 | 73080 length 1502 cvg_8.1_tip_1  | 4.95625E-08 | 1502 | 585 | 13309224  |
| 1 | 69750 length 746 cvg_9.0_tip_1   | 2.42283E-08 | 746  | 293 | 305635912 |
| 1 | 72380 length 1164 cvg_5.5_tip_1  | 1.08E-17    | 1164 | 180 | 60639146  |
| 1 | 56340 length 334 cvg_5.0_tip_1   | 3.20E-24    | 334  | 628 | 282723254 |
| 1 | 66544 length 563 cvg_8.0_tip_1   | 9.67E-32    | 563  | 652 | 60561155  |
| 1 | 66662 length 567 cvg_5.0_tip_1   | 5.17E-18    | 567  | 586 | 157989590 |
| 1 | 55168 length 319 cvg_6.0_tip_1   | 1.12E-17    | 319  | 738 | 45765625  |
| 1 | 63024 length 453 cvg_5.0_tip_1   | 5.9374E-11  | 453  | 534 | 8273999   |
| 1 | 65052 length 511 cvg_5.0_tip_1   | 5.00E-24    | 511  | 928 | 23702215  |
| 1 | 69744 length 745 cvg_7.0_tip_1   | 1.60945E-12 | 745  | 611 | 178588315 |
| 1 | 70486 length 818 cvg_5.0_tip_1   | 1.09313E-10 | 818  | 799 | 62837558  |
| 1 | 59426 length 382 cvg_6.0_tip_1   | 1.20866E-08 | 382  | 805 | 46174282  |
| 1 | 72092 length 1086 cvg_10.0_tip_1 | 5.77506E-10 | 1086 | 693 | 60561524  |
| 1 | 57784 length 355 cvg_55.0_tip_0  | 7.16151E-10 | 355  | 620 | 60559538  |
| 1 | 57850 length 356 cvg_6.0_tip_1   | 6.91688E-07 | 356  | 693 | 76047314  |
| 1 | 73416 length 1901 cvg_9.0_tip_1  | 3.11E-25    | 1901 | 820 | 282754755 |
| 1 | 55732 length 326 cvg_4.1_tip_1   | 6.78939E-13 | 326  | 584 | 288238414 |
| 1 | 61076 length 411 cvg_5.0_tip_1   | 3.56471E-15 | 411  | 223 | 114758498 |
| 1 | 62244 length 435 cvg_6.0_tip_1   | 1.49536E-14 | 435  | 734 | 54530162  |

|   |                                  |             |      |      |           |
|---|----------------------------------|-------------|------|------|-----------|
| 1 | 72516 length 1211 cvg_10.0_tip_1 | 1.08661E-14 | 1211 | 348  | 282749630 |
| 1 | 54720 length 314 cvg_7.0_tip_1   | 4.34E-17    | 314  | 678  | 60436975  |
| 1 | 56160 length 332 cvg_5.0_tip_1   | 4.43484E-14 | 332  | 775  | 84582938  |
| 1 | 57420 length 350 cvg_4.0_tip_1   | 3.24E-21    | 350  | 1033 | 23695195  |
| 1 | 72716 length 1278 cvg_10.0_tip_1 | 5.27E-26    | 1278 | 696  | 60564770  |
| 1 | 55424 length 322 cvg_5.0_tip_1   | 7.23E-19    | 322  | 736  | 62848028  |
| 1 | 70162 length 783 cvg_9.0_tip_1   | 4.12893E-10 | 783  | 157  | 104297306 |
| 1 | 70190 length 786 cvg_9.9_tip_1   | 4.64E-19    | 786  | 696  | 60564770  |
| 1 | 62162 length 433 cvg_5.0_tip_1   | 1.07E-24    | 433  | 808  | 23707850  |
| 1 | 61642 length 422 cvg_6.7_tip_1   | 9.28E-16    | 422  | 488  | 60440267  |
| 1 | 62010 length 429 cvg_8.0_tip_1   | 9.80E-19    | 429  | 758  | 34409494  |
| 1 | 64680 length 500 cvg_4.0_tip_1   | 4.0456E-09  | 500  | 443  | 77992502  |
| 1 | 67862 length 620 cvg_8.0_tip_1   | 2.33E-20    | 620  | 484  | 50633323  |
| 1 | 62226 length 434 cvg_6.0_tip_1   | 9.92E-19    | 434  | 654  | 54502201  |
| 1 | 63238 length 459 cvg_4.0_tip_1   | 2.47012E-13 | 459  | 570  | 60565684  |
| 1 | 61688 length 423 cvg_6.0_tip_1   | 8.30439E-07 | 423  | 721  | 76555249  |
| 1 | 56290 length 334 cvg_4.0_tip_1   | 1.76356E-13 | 334  | 273  | 60636262  |
| 1 | 67502 length 603 cvg_9.0_tip_1   | 9.63E-26    | 603  | 479  | 84587058  |
| 1 | 70366 length 804 cvg_8.0_tip_1   | 1.20E-19    | 804  | 664  | 60541004  |
| 1 | 68862 length 684 cvg_7.0_tip_1   | 8.752E-08   | 684  | 612  | 50675248  |
| 1 | 69022 length 693 cvg_60.2_tip_0  | 5.47196E-06 | 693  | 613  | 15183948  |
| 1 | 61282 length 414 cvg_5.0_tip_1   | 1.06E-27    | 414  | 753  | 62143727  |
| 1 | 62722 length 445 cvg_5.5_tip_1   | 2.48E-16    | 445  | 527  | 18817175  |
| 1 | 61866 length 426 cvg_4.0_tip_1   | 1.01E-21    | 426  | 730  | 282754221 |
| 1 | 64358 length 490 cvg_8.6_tip_1   | 6.92E-17    | 490  | 702  | 282725793 |
| 1 | 64498 length 494 cvg_8.0_tip_1   | 3.09E-25    | 494  | 592  | 62851340  |
| 1 | 70086 length 775 cvg_9.0_tip_1   | 5.74E-37    | 775  | 730  | 282754221 |
| 1 | 73108 length 1518 cvg_9.0_tip_1  | 5.05E-45    | 1518 | 465  | 282734047 |
| 1 | 56466 length 336 cvg_6.0_tip_1   | 1.05422E-08 | 336  | 548  | 60558754  |
| 1 | 58986 length 375 cvg_6.0_tip_1   | 7.59163E-10 | 375  | 702  | 60441321  |
| 1 | 62170 length 433 cvg_10.0_tip_1  | 9.53E-16    | 433  | 370  | 119276610 |
| 1 | 65358 length 521 cvg_8.5_tip_1   | 6.59379E-08 | 521  | 851  | 288236892 |
| 1 | 65394 length 523 cvg_8.0_tip_1   | 6.93E-48    | 523  | 716  | 282756139 |
| 1 | 69918 length 760 cvg_7.0_tip_1   | 3.85562E-07 | 760  | 113  | 60629659  |
| 1 | 71814 length 1023 cvg_6.0_tip_1  | 1.42791E-13 | 1023 | 403  | 282760188 |
| 1 | 72342 length 1155 cvg_11.0_tip_1 | 4.58E-23    | 1155 | 520  | 282724317 |
| 1 | 58124 length 360 cvg_6.0_tip_1   | 1.83974E-10 | 360  | 946  | 34410000  |
| 1 | 73520 length 2106 cvg_52.2_tip_0 | 7.29E-48    | 2106 | 625  | 60616748  |
| 1 | 64758 length 503 cvg_7.0_tip_1   | 8.28E-29    | 503  | 652  | 60438108  |
| 1 | 66008 length 542 cvg_6.0_tip_1   | 1.80613E-11 | 542  | 713  | 84581727  |
| 1 | 70880 length 875 cvg_5.0_tip_1   | 6.03E-31    | 875  | 477  | 60636173  |
| 1 | 72862 length 1364 cvg_5.0_tip_1  | 2.23E-25    | 1364 | 810  | 282755911 |
| 1 | 60568 length 401 cvg_3.0_tip_1   | 3.10115E-06 | 401  | 489  | 7841767   |
| 1 | 61992 length 429 cvg_10.0_tip_1  | 5.60678E-11 | 429  | 752  | 62139474  |
| 1 | 69032 length 694 cvg_10.0_tip_1  | 7.70E-33    | 694  | 672  | 60555287  |
| 1 | 59626 length 386 cvg_4.0_tip_1   | 1.72E-35    | 386  | 625  | 60616748  |
| 1 | 58588 length 368 cvg_5.0_tip_1   | 8.02E-16    | 368  | 682  | 62850827  |
| 1 | 55854 length 328 cvg_6.0_tip_1   | 1.66556E-10 | 328  | 735  | 54536530  |

|   |                                  |             |      |      |           |
|---|----------------------------------|-------------|------|------|-----------|
| 1 | 71122 length 911 cvg_9.0_tip_1   | 7.82122E-12 | 911  | 731  | 282759073 |
| 1 | 71530 length 969 cvg_9.0_tip_1   | 1.95541E-06 | 969  | 1237 | 199584710 |
| 1 | 55578 length 325 cvg_4.0_tip_1   | 6.27489E-07 | 325  | 559  | 32000872  |
| 1 | 67014 length 582 cvg_11.2_tip_1  | 2.92441E-07 | 582  | 544  | 20430286  |
| 1 | 62514 length 441 cvg_5.0_tip_1   | 2.55E-19    | 441  | 637  | 60559835  |
| 1 | 55630 length 325 cvg_5.0_tip_1   | 2.99E-21    | 325  | 516  | 18822515  |
| 1 | 60880 length 407 cvg_6.0_tip_1   | 5.72E-17    | 407  | 779  | 74261518  |
| 1 | 68306 length 644 cvg_8.0_tip_1   | 4.56E-34    | 644  | 751  | 56270157  |
| 1 | 68610 length 665 cvg_4.0_tip_1   | 4.06E-22    | 665  | 751  | 56270157  |
| 1 | 69226 length 706 cvg_6.0_tip_1   | 3.7106E-10  | 706  | 679  | 68285846  |
| 1 | 73274 length 1680 cvg_9.0_tip_1  | 3.08E-34    | 1680 | 716  | 282756139 |
| 1 | 69430 length 722 cvg_8.0_tip_1   | 3.79752E-10 | 722  | 585  | 50535757  |
| 1 | 56206 length 333 cvg_5.0_tip_1   | 9.39E-37    | 333  | 640  | 62144031  |
| 1 | 60262 length 395 cvg_4.0_tip_1   | 5.54E-17    | 395  | 734  | 54503899  |
| 1 | 68740 length 674 cvg_6.0_tip_1   | 1.12E-28    | 674  | 898  | 148752116 |
| 1 | 69086 length 697 cvg_49.7_tip_0  | 3.29E-38    | 697  | 555  | 50435963  |
| 1 | 64214 length 486 cvg_6.0_tip_1   | 2.82E-19    | 486  | 640  | 62144031  |
| 1 | 64992 length 509 cvg_7.7_tip_1   | 7.21E-17    | 509  | 709  | 282723543 |
| 1 | 72234 length 1121 cvg_10.0_tip_1 | 5.74419E-07 | 1121 | 580  | 83082001  |
| 1 | 63676 length 471 cvg_5.0_tip_1   | 1.08E-18    | 471  | 654  | 282757066 |
| 1 | 72834 length 1346 cvg_8.4_tip_1  | 1.16526E-11 | 1346 | 311  | 282760362 |
| 1 | 55522 length 324 cvg_4.0_tip_1   | 3.10E-24    | 324  | 765  | 75879166  |
| 1 | 67324 length 596 cvg_5.0_tip_1   | 1.54E-27    | 596  | 761  | 59790528  |
| 1 | 69668 length 740 cvg_9.9_tip_1   | 6.08112E-09 | 740  | 677  | 282754938 |
| 1 | 70768 length 859 cvg_8.0_tip_1   | 1.07E-41    | 859  | 625  | 60616748  |
| 1 | 68928 length 686 cvg_7.0_tip_1   | 2.30726E-11 | 686  | 626  | 62141324  |
| 1 | 56812 length 341 cvg_8.0_tip_1   | 1.67199E-07 | 341  | 813  | 282742723 |
| 1 | 70776 length 860 cvg_10.0_tip_1  | 5.37E-96    | 860  | 512  | 18821012  |
| 1 | 72212 length 1117 cvg_10.0_tip_1 | 4.26E-20    | 1117 | 946  | 34410000  |
| 1 | 65150 length 514 cvg_6.6_tip_1   | 4.01004E-06 | 514  | 732  | 31002593  |
| 1 | 66104 length 545 cvg_9.0_tip_1   | 4.77451E-15 | 545  | 822  | 282754533 |
| 1 | 70164 length 784 cvg_8.6_tip_1   | 2.6483E-11  | 784  | 618  | 62888887  |
| 1 | 57368 length 349 cvg_8.0_tip_1   | 2.99656E-15 | 349  | 488  | 183050530 |
| 1 | 63492 length 466 cvg_6.0_tip_1   | 1.94E-29    | 466  | 589  | 282746884 |
| 1 | 65202 length 516 cvg_5.0_tip_1   | 8.50E-29    | 516  | 544  | 60561327  |
| 1 | 69036 length 694 cvg_9.0_tip_1   | 8.88441E-08 | 694  | 541  | 83457064  |
| 1 | 59486 length 383 cvg_5.0_tip_1   | 1.41E-20    | 383  | 387  | 282759583 |
| 1 | 58902 length 373 cvg_6.0_tip_1   | 2.22E-22    | 373  | 761  | 59790528  |
| 1 | 71968 length 1059 cvg_7.9_tip_1  | 4.19E-23    | 1059 | 255  | 104302143 |
| 1 | 71406 length 949 cvg_10.0_tip_1  | 1.91407E-06 | 949  | 789  | 23696779  |
| 1 | 65918 length 539 cvg_6.0_tip_1   | 1.1945E-15  | 539  | 905  | 23707849  |
| 1 | 62286 length 436 cvg_7.0_tip_1   | 3.65324E-12 | 436  | 493  | 282738885 |
| 1 | 60602 length 402 cvg_7.0_tip_1   | 2.01E-44    | 402  | 801  | 23704872  |
| 1 | 60036 length 392 cvg_5.0_tip_1   | 5.09707E-11 | 392  | 672  | 60437676  |
| 1 | 70580 length 833 cvg_7.9_tip_1   | 5.12E-22    | 833  | 628  | 67563653  |
| 1 | 71806 length 1022 cvg_4.8_tip_1  | 5.42736E-10 | 1022 | 571  | 50579235  |
| 1 | 66528 length 562 cvg_9.0_tip_1   | 2.81978E-07 | 562  | 626  | 34169446  |
| 1 | 73162 length 1546 cvg_11.0_tip_1 | 8.92E-16    | 1546 | 822  | 148279529 |



|   |                                  |             |      |     |           |
|---|----------------------------------|-------------|------|-----|-----------|
| 1 | 53860 length 305 cvg_4.0_tip_0   | 8.55E-37    | 305  | 401 | 60516426  |
| 1 | 53862 length 305 cvg_56.7_tip_0  | 3.51E-39    | 305  | 401 | 60516426  |
| 1 | 55136 length 319 cvg_55.1_tip_0  | 6.63306E-13 | 319  | 419 | 60514839  |
| 1 | 55192 length 319 cvg_4.0_tip_0   | 6.63306E-13 | 319  | 419 | 60514839  |
| 1 | 55466 length 323 cvg_37.4_tip_1  | 6.05E-41    | 323  | 839 | 84585402  |
| 1 | 56996 length 344 cvg_4.0_tip_1   | 4.47E-48    | 344  | 525 | 60514129  |
| 1 | 57158 length 346 cvg_4.0_tip_1   | 9.08E-31    | 346  | 839 | 84585402  |
| 1 | 58304 length 363 cvg_55.0_tip_0  | 5.51E-60    | 363  | 401 | 60516426  |
| 1 | 62812 length 447 cvg_4.0_tip_1   | 2.90E-28    | 447  | 738 | 213483311 |
| 1 | 63250 length 459 cvg_55.2_tip_0  | 1.98E-32    | 459  | 401 | 60516426  |
| 1 | 63802 length 474 cvg_58.0_tip_0  | 4.33E-55    | 474  | 551 | 60516699  |
| 1 | 65112 length 513 cvg_60.8_tip_0  | 4.19E-46    | 513  | 525 | 60514129  |
| 1 | 66730 length 570 cvg_5.0_tip_1   | 7.52125E-11 | 570  | 700 | 60626175  |
| 1 | 68032 length 630 cvg_58.0_tip_0  | 2.30E-54    | 630  | 551 | 60516699  |
| 1 | 68224 length 641 cvg_58.7_tip_0  | 5.70E-52    | 641  | 839 | 84585402  |
| 1 | 72200 length 1114 cvg_61.8_tip_0 | 3.86E-85    | 1114 | 457 | 18821131  |
| 1 | 73640 length 2504 cvg_53.7_tip_1 | 8.49E-119   | 2504 | 407 | 60518838  |
| 1 | 69740 length 745 cvg_6.0_tip_1   | 2.28E-76    | 745  | 575 | 18817122  |
| 1 | 71600 length 982 cvg_6.0_tip_1   | 6.84E-68    | 982  | 874 | 84584654  |
| 1 | 72900 length 1382 cvg_6.0_tip_1  | 0           | 1382 | 691 | 62134052  |
| 1 | 66198 length 549 cvg_5.0_tip_1   | 0           | 549  | 652 | 50437781  |
| 1 | 54362 length 310 cvg_5.0_tip_1   | 9.31102E-06 | 310  | 335 | 282736064 |
| 1 | 56972 length 344 cvg_3.0_tip_1   | 3.70E-33    | 344  | 475 | 60440763  |
| 1 | 58212 length 362 cvg_6.0_tip_1   | 2.78204E-06 | 362  | 894 | 34407989  |
| 1 | 67128 length 588 cvg_5.6_tip_1   | 2.20E-20    | 588  | 742 | 119679084 |
| 1 | 72484 length 1198 cvg_5.0_tip_1  | 1.12E-17    | 1198 | 633 | 51549664  |
| 1 | 72700 length 1272 cvg_9.8_tip_1  | 3.12E-21    | 1272 | 633 | 51549664  |
| 1 | 73126 length 1527 cvg_11.0_tip_1 | 2.69E-31    | 1527 | 810 | 282755911 |
| 1 | 55350 length 321 cvg_7.0_tip_1   | 1.97E-25    | 321  | 841 | 282752660 |
| 1 | 55558 length 324 cvg_10.6_tip_1  | 2.40E-40    | 324  | 511 | 282757412 |
| 1 | 55740 length 326 cvg_6.0_tip_1   | 1.23E-23    | 326  | 617 | 60637083  |
| 1 | 56598 length 338 cvg_4.0_tip_1   | 1.85E-16    | 338  | 751 | 30983371  |
| 1 | 56680 length 339 cvg_5.0_tip_1   | 7.07973E-13 | 339  | 652 | 60561155  |
| 1 | 56818 length 341 cvg_8.0_tip_1   | 2.61021E-06 | 341  | 461 | 60719743  |
| 1 | 57102 length 345 cvg_7.0_tip_1   | 2.64294E-06 | 345  | 209 | 162285837 |
| 1 | 57730 length 354 cvg_6.0_tip_1   | 2.71658E-06 | 354  | 544 | 83121497  |
| 1 | 59154 length 378 cvg_6.0_tip_1   | 2.94E-43    | 378  | 511 | 282757412 |
| 1 | 60798 length 405 cvg_7.0_tip_1   | 2.08468E-10 | 405  | 758 | 282753432 |
| 1 | 62110 length 432 cvg_8.0_tip_1   | 7.36E-32    | 432  | 448 | 60508633  |
| 1 | 62522 length 441 cvg_6.0_tip_1   | 3.99E-18    | 441  | 349 | 5546949   |
| 1 | 65132 length 514 cvg_5.0_tip_1   | 8.86E-69    | 514  | 730 | 60640953  |
| 1 | 65584 length 528 cvg_6.8_tip_1   | 1.04385E-06 | 528  | 720 | 60441151  |
| 1 | 65868 length 538 cvg_8.2_tip_1   | 4.24E-43    | 538  | 788 | 282731911 |
| 1 | 66726 length 570 cvg_7.3_tip_1   | 4.8178E-12  | 570  | 612 | 282723291 |
| 1 | 66828 length 574 cvg_7.0_tip_1   | 1.48E-27    | 574  | 731 | 282738250 |
| 1 | 66842 length 574 cvg_8.0_tip_1   | 1.73E-39    | 574  | 724 | 62839303  |
| 1 | 66942 length 579 cvg_10.0_tip_1  | 5.28E-18    | 579  | 577 | 60638928  |
| 1 | 67096 length 586 cvg_8.0_tip_1   | 1.83E-42    | 586  | 946 | 34410000  |

|   |                                  |             |      |     |           |
|---|----------------------------------|-------------|------|-----|-----------|
| 1 | 67214 length 592 cvg_8.9_tip_1   | 8.83E-57    | 592  | 387 | 282759583 |
| 1 | 67546 length 605 cvg_8.0_tip_1   | 9.31E-23    | 605  | 711 | 62835176  |
| 1 | 67650 length 611 cvg_11.0_tip_1  | 1.52E-24    | 611  | 808 | 23704870  |
| 1 | 67984 length 627 cvg_10.9_tip_1  | 1.39822E-15 | 627  | 526 | 74368314  |
| 1 | 68250 length 642 cvg_4.0_tip_1   | 6.34E-24    | 642  | 472 | 21550046  |
| 1 | 68304 length 644 cvg_13.5_tip_1  | 8.60E-48    | 644  | 537 | 282723552 |
| 1 | 68500 length 657 cvg_9.0_tip_1   | 9.40E-17    | 657  | 580 | 18817874  |
| 1 | 68856 length 683 cvg_8.5_tip_1   | 4.50E-28    | 683  | 387 | 282759583 |
| 1 | 68890 length 685 cvg_8.0_tip_1   | 7.59E-33    | 685  | 697 | 60435036  |
| 1 | 69318 length 713 cvg_6.0_tip_1   | 6.0773E-12  | 713  | 812 | 74361243  |
| 1 | 70244 length 791 cvg_6.0_tip_1   | 1.01687E-07 | 791  | 638 | 15911811  |
| 1 | 70956 length 889 cvg_10.0_tip_1  | 8.54E-21    | 889  | 855 | 34414544  |
| 1 | 71038 length 900 cvg_9.0_tip_1   | 8.72E-58    | 900  | 725 | 34409433  |
| 1 | 71066 length 903 cvg_9.0_tip_0   | 9.72E-30    | 903  | 508 | 20430560  |
| 1 | 71608 length 984 cvg_10.0_tip_1  | 1.86E-37    | 984  | 185 | 282725291 |
| 1 | 71648 length 996 cvg_5.0_tip_1   | 1.28831E-07 | 996  | 786 | 62834852  |
| 1 | 72012 length 1065 cvg_8.0_tip_1  | 3.49183E-08 | 1065 | 872 | 34413975  |
| 1 | 72278 length 1134 cvg_9.0_tip_1  | 1.5864E-13  | 1134 | 533 | 282733423 |
| 1 | 73298 length 1713 cvg_46.3_tip_1 | 2.51E-16    | 1713 | 750 | 60635400  |
| 1 | 73436 length 1940 cvg_10.0_tip_1 | 1.30E-27    | 1940 | 641 | 104296258 |
| 1 | 53372 length 300 cvg_5.0_tip_1   | 6.90E-167   | 300  | 675 | 84581729  |
| 1 | 65342 length 521 cvg_7.0_tip_1   | 4.22371E-09 | 521  | 554 | 282739631 |
| 1 | 53888 length 305 cvg_4.0_tip_1   | 1.12E-94    | 305  | 720 | 62848714  |
| 1 | 67828 length 619 cvg_5.0_tip_1   | 2.32E-20    | 619  | 451 | 19690633  |
| 1 | 69026 length 694 cvg_5.0_tip_1   | 1.04E-56    | 694  | 704 | 24810808  |
| 1 | 69682 length 741 cvg_5.0_tip_1   | 2.52E-48    | 741  | 778 | 28280137  |
| 1 | 62158 length 433 cvg_9.0_tip_1   | 2.23708E-10 | 433  | 638 | 60524354  |
| 1 | 60786 length 405 cvg_4.0_tip_1   | 2.02E-44    | 405  | 559 | 83508837  |
| 1 | 69616 length 737 cvg_5.0_tip_1   | 4.90E-65    | 737  | 471 | 80893274  |
| 1 | 70258 length 793 cvg_5.0_tip_1   | 3.76E-38    | 793  | 704 | 24810808  |
| 1 | 57984 length 358 cvg_5.7_tip_1   | 2.85509E-09 | 358  | 584 | 50517054  |
| 1 | 69438 length 722 cvg_7.0_tip_1   | 3.94364E-13 | 722  | 618 | 32272727  |
| 1 | 58700 length 370 cvg_6.7_tip_1   | 7.77207E-13 | 370  | 767 | 74371800  |
| 1 | 63308 length 461 cvg_10.0_tip_1  | 9.44115E-10 | 461  | 528 | 84123343  |
| 1 | 61746 length 424 cvg_6.0_tip_1   | 9.05E-50    | 424  | 536 | 81276811  |
| 1 | 60578 length 401 cvg_5.0_tip_1   | 1.32141E-11 | 401  | 486 | 50433427  |
| 1 | 64160 length 484 cvg_7.4_tip_1   | 1.54485E-08 | 484  | 590 | 12371705  |
| 1 | 67798 length 617 cvg_7.0_tip_1   | 5.86E-21    | 617  | 856 | 90230938  |
| 1 | 70682 length 847 cvg_8.0_tip_1   | 7.53678E-15 | 847  | 847 | 82817305  |
| 1 | 63984 length 479 cvg_9.0_tip_1   | 1.72E-17    | 479  | 261 | 18982090  |
| 1 | 73316 length 1741 cvg_9.0_tip_1  | 2.35643E-10 | 1741 | 558 | 50641816  |
| 1 | 62644 length 444 cvg_7.9_tip_1   | 3.58586E-09 | 444  | 698 | 60558484  |
| 1 | 66776 length 572 cvg_5.0_tip_1   | 6.06E-30    | 572  | 718 | 62133031  |
| 1 | 62640 length 444 cvg_9.0_tip_1   | 1.41682E-08 | 444  | 719 | 112765394 |
| 1 | 67688 length 613 cvg_8.0_tip_1   | 2.05321E-11 | 613  | 248 | 1986089   |
| 1 | 68530 length 659 cvg_8.0_tip_1   | 1.93E-73    | 659  | 416 | 2054152   |
| 1 | 59238 length 379 cvg_4.0_tip_1   | 7.67766E-10 | 379  | 871 | 51887221  |
| 1 | 68462 length 654 cvg_8.7_tip_1   | 8.35478E-08 | 654  | 466 | 83532002  |

|   |                                  |             |      |     |           |
|---|----------------------------------|-------------|------|-----|-----------|
| 1 | 59242 length 379 cvg_8.0_tip_1   | 3.42E-55    | 379  | 814 | 112212336 |
| 1 | 54340 length 309 cvg_5.0_tip_1   | 9.00E-40    | 309  | 398 | 10096673  |
| 1 | 68654 length 668 cvg_5.0_tip_1   | 6.36E-21    | 668  | 792 | 295141839 |
| 1 | 63990 length 479 cvg_7.0_tip_1   | 6.79E-17    | 479  | 561 | 78754941  |
| 1 | 63338 length 462 cvg_6.0_tip_1   | 4.03206E-15 | 462  | 403 | 182550396 |
| 1 | 68238 length 641 cvg_9.0_tip_1   | 3.62E-16    | 641  | 661 | 84125986  |
| 1 | 64950 length 508 cvg_7.0_tip_1   | 3.96104E-06 | 508  | 541 | 10908781  |
| 1 | 73050 length 1479 cvg_10.0_tip_1 | 3.0096E-06  | 1479 | 266 | 9007846   |
| 1 | 68142 length 636 cvg_6.0_tip_1   | 2.30E-17    | 636  | 603 | 282734033 |
| 1 | 61950 length 428 cvg_9.0_tip_1   | 2.81E-102   | 428  | 636 | 50453538  |
| 1 | 53416 length 300 cvg_5.0_tip_1   | 3.61E-79    | 300  | 443 | 50440720  |
| 1 | 54788 length 315 cvg_5.0_tip_1   | 4.22E-51    | 315  | 443 | 50440720  |
| 1 | 70364 length 804 cvg_9.0_tip_1   | 1.74097E-12 | 804  | 375 | 2161279   |
| 1 | 68132 length 635 cvg_5.0_tip_1   | 4.99826E-06 | 635  | 623 | 56201124  |
| 1 | 70538 length 826 cvg_9.0_tip_1   | 1.19E-16    | 826  | 490 | 27844795  |
| 1 | 67224 length 592 cvg_6.0_tip_1   | 5.2044E-15  | 592  | 329 | 60439037  |
| 1 | 66282 length 552 cvg_5.2_tip_1   | 8.15E-20    | 552  | 510 | 19758575  |
| 1 | 73210 length 1591 cvg_10.0_tip_1 | 4.22E-27    | 1591 | 812 | 108889247 |
| 1 | 53812 length 304 cvg_7.0_tip_1   | 1.55E-47    | 304  | 440 | 60506954  |
| 1 | 72706 length 1274 cvg_8.6_tip_1  | 4.88E-20    | 1274 | 628 | 67563653  |
| 1 | 65564 length 527 cvg_9.0_tip_1   | 1.26E-21    | 527  | 561 | 68325227  |
| 1 | 73558 length 2206 cvg_10.0_tip_1 | 8.17E-17    | 2206 | 524 | 50639467  |
| 1 | 58882 length 373 cvg_5.0_tip_1   | 2.98255E-09 | 373  | 391 | 8609972   |
| 1 | 61662 length 422 cvg_7.0_tip_1   | 0           | 422  | 806 | 60452417  |
| 1 | 56222 length 333 cvg_9.0_tip_1   | 4.2843E-11  | 333  | 445 | 272528    |
| 1 | 71382 length 947 cvg_8.0_tip_1   | 1.14E-38    | 947  | 496 | 60578525  |
| 1 | 70320 length 799 cvg_8.0_tip_1   | 1.72983E-12 | 799  | 514 | 104300644 |
| 1 | 72268 length 1130 cvg_10.0_tip_1 | 9.04098E-06 | 1130 | 771 | 13334467  |
| 1 | 60386 length 398 cvg_4.0_tip_1   | 7.78666E-07 | 398  | 727 | 219660191 |
| 1 | 61056 length 410 cvg_9.0_tip_1   | 8.34434E-10 | 410  | 413 | 104297892 |
| 1 | 73496 length 2042 cvg_7.8_tip_1  | 1.06E-43    | 2042 | 680 | 60607532  |
| 1 | 66570 length 564 cvg_9.0_tip_1   | 0           | 564  | 632 | 62888779  |
| 1 | 56124 length 331 cvg_7.0_tip_1   | 1.1188E-14  | 331  | 556 | 82056436  |
| 1 | 71420 length 952 cvg_9.1_tip_1   | 5.44E-16    | 952  | 176 | 182831302 |
| 1 | 68988 length 691 cvg_9.0_tip_1   | 6.59E-21    | 691  | 238 | 5511402   |
| 1 | 66690 length 568 cvg_8.0_tip_1   | 7.55E-48    | 568  | 332 | 7848324   |
| 1 | 64962 length 508 cvg_5.1_tip_1   | 6.92535E-14 | 508  | 108 | 109535318 |
| 1 | 61366 length 416 cvg_5.0_tip_1   | 1.32281E-08 | 416  | 474 | 40390198  |
| 1 | 65888 length 538 cvg_6.0_tip_1   | 1.06452E-06 | 538  | 759 | 57718503  |
| 1 | 61484 length 418 cvg_8.0_tip_1   | 5.88E-17    | 418  | 718 | 62844540  |
| 1 | 54096 length 307 cvg_4.0_tip_1   | 9.21403E-06 | 307  | 292 | 60525045  |
| 1 | 67764 length 616 cvg_9.7_tip_1   | 6.07E-24    | 616  | 524 | 14344329  |
| 1 | 56324 length 334 cvg_7.0_tip_1   | 1.04751E-08 | 334  | 798 | 77213783  |
| 1 | 60112 length 393 cvg_9.4_tip_0   | 1.94454E-07 | 393  | 573 | 80934884  |
| 1 | 60192 length 394 cvg_10.0_tip_1  | 6.98E-72    | 394  | 772 | 84589540  |
| 1 | 65740 length 533 cvg_10.6_tip_1  | 1.32E-24    | 533  | 625 | 24727431  |
| 1 | 53570 length 302 cvg_7.0_tip_1   | 1.51E-155   | 302  | 445 | 50637428  |
| 1 | 69454 length 723 cvg_6.0_tip_1   | 5.93694E-09 | 723  | 558 | 10868665  |

|   |                                  |             |      |     |           |
|---|----------------------------------|-------------|------|-----|-----------|
| 1 | 71308 length 935 cvg_8.9_tip_1   | 8.34168E-15 | 935  | 805 | 51881601  |
| 1 | 72638 length 1250 cvg_9.0_tip_1  | 1.75204E-13 | 1250 | 233 | 7947441   |
| 1 | 72672 length 1259 cvg_10.0_tip_1 | 2.65315E-09 | 1259 | 676 | 62849115  |
| 1 | 69924 length 761 cvg_10.0_tip_1  | 4.0094E-10  | 761  | 545 | 77950380  |
| 1 | 63928 length 478 cvg_9.0_tip_1   | 1.99E-29    | 478  | 590 | 50278056  |
| 1 | 65732 length 533 cvg_6.0_tip_1   | 7.0125E-11  | 533  | 861 | 11155596  |
| 1 | 68932 length 687 cvg_6.0_tip_1   | 2.22512E-08 | 687  | 680 | 149943195 |
| 1 | 68936 length 687 cvg_8.8_tip_1   | 1.42532E-09 | 687  | 306 | 7954996   |
| 1 | 67136 length 588 cvg_7.0_tip_1   | 9.53E-100   | 588  | 840 | 10934744  |
| 1 | 71662 length 997 cvg_7.0_tip_1   | 8.26083E-09 | 997  | 540 | 83505506  |
| 1 | 71480 length 960 cvg_5.0_tip_1   | 8.2528E-12  | 960  | 804 | 77205056  |
| 1 | 55812 length 327 cvg_7.0_tip_1   | 1.86E-19    | 327  | 237 | 14433994  |
| 1 | 72224 length 1119 cvg_10.0_tip_1 | 8.82E-114   | 1119 | 607 | 160508121 |
| 1 | 55504 length 323 cvg_8.8_tip_1   | 1.57765E-07 | 323  | 569 | 82062700  |
| 1 | 70796 length 863 cvg_8.0_tip_1   | 2.53E-36    | 863  | 524 | 83494740  |
| 1 | 71330 length 938 cvg_9.7_tip_1   | 1.42E-56    | 938  | 544 | 83437273  |
| 1 | 72086 length 1084 cvg_9.0_tip_1  | 6.96E-25    | 1084 | 218 | 12349328  |
| 1 | 65496 length 525 cvg_7.0_tip_1   | 1.11904E-12 | 525  | 569 | 60591752  |
| 1 | 62148 length 432 cvg_10.0_tip_1  | 8.49078E-07 | 432  | 656 | 288260990 |
| 1 | 71912 length 1044 cvg_8.9_tip_1  | 1.35186E-07 | 1044 | 198 | 8112680   |
| 1 | 71612 length 986 cvg_8.9_tip_1   | 2.22928E-15 | 986  | 573 | 77941560  |
| 1 | 72732 length 1287 cvg_5.0_tip_1  | 3.04E-18    | 1287 | 553 | 78560871  |
| 1 | 71830 length 1026 cvg_9.0_tip_1  | 5.2472E-07  | 1026 | 658 | 57721644  |
| 1 | 62916 length 450 cvg_9.0_tip_1   | 1.49225E-11 | 450  | 758 | 34477569  |
| 1 | 56908 length 343 cvg_9.0_tip_1   | 4.25821E-08 | 343  | 423 | 288289888 |
| 1 | 69912 length 759 cvg_8.0_tip_1   | 0           | 759  | 602 | 50532973  |
| 1 | 70232 length 791 cvg_9.0_tip_1   | 4.33293E-13 | 791  | 352 | 570833    |
| 1 | 58260 length 362 cvg_4.0_tip_1   | 1.92183E-13 | 362  | 732 | 62141073  |
| 1 | 62754 length 446 cvg_6.0_tip_1   | 8.7807E-07  | 446  | 587 | 19620081  |
| 1 | 69344 length 716 cvg_4.8_tip_1   | 9.1757E-08  | 716  | 774 | 269804351 |
| 1 | 72416 length 1175 cvg_8.0_tip_1  | 5.22E-32    | 1175 | 280 | 104297801 |
| 1 | 72518 length 1213 cvg_9.0_tip_1  | 2.39E-40    | 1213 | 646 | 114725157 |
| 1 | 69392 length 719 cvg_9.0_tip_1   | 9.57E-11    | 719  | 811 | 15255878  |
| 1 | 69040 length 695 cvg_7.0_tip_1   | 1.69E-58    | 695  | 732 | 302086846 |
| 1 | 72084 length 1084 cvg_9.0_tip_1  | 6.96E-25    | 1084 | 404 | 229652156 |
| 1 | 68466 length 655 cvg_9.0_tip_1   | 1.52E-18    | 655  | 452 | 77992687  |
| 1 | 61930 length 428 cvg_6.0_tip_1   | 2.12799E-07 | 428  | 476 | 90935545  |
| 1 | 61104 length 411 cvg_4.0_tip_1   | 3.18298E-06 | 411  | 947 | 160515428 |
| 1 | 70340 length 802 cvg_9.0_tip_1   | 1.16E-16    | 802  | 646 | 60556714  |
| 1 | 58672 length 369 cvg_8.0_tip_1   | 9.08E-62    | 369  | 571 | 29208743  |
| 1 | 69782 length 748 cvg_5.0_tip_1   | 6.38557E-12 | 748  | 537 | 19609055  |
| 1 | 71374 length 945 cvg_9.0_tip_1   | 1.15E-75    | 945  | 607 | 60624621  |
| 1 | 58464 length 366 cvg_5.0_tip_1   | 2.81477E-06 | 366  | 591 | 83232158  |
| 1 | 58436 length 365 cvg_5.0_tip_1   | 3.42E-58    | 365  | 603 | 282734033 |
| 1 | 56168 length 332 cvg_7.0_tip_1   | 1.36E-29    | 332  | 708 | 60634151  |
| 1 | 57668 length 353 cvg_7.0_tip_1   | 6.85475E-07 | 353  | 778 | 108900686 |
| 1 | 59116 length 377 cvg_7.0_tip_1   | 1.20E-45    | 377  | 693 | 1307555   |
| 1 | 70480 length 817 cvg_5.0_tip_1   | 1.64122E-06 | 817  | 736 | 62848028  |

|   |                                  |             |      |     |           |
|---|----------------------------------|-------------|------|-----|-----------|
| 1 | 57002 length 344 cvg_5.0_tip_1   | 6.66837E-07 | 344  | 808 | 68422475  |
| 1 | 60472 length 399 cvg_4.0_tip_1   | 3.08479E-06 | 399  | 721 | 60560370  |
| 1 | 73630 length 2428 cvg_9.7_tip_1  | 1.35374E-12 | 2428 | 465 | 1229468   |
| 1 | 65542 length 527 cvg_7.3_tip_1   | 4.2746E-09  | 527  | 433 | 6399941   |
| 1 | 72182 length 1109 cvg_9.0_tip_1  | 2.26E-43    | 1109 | 816 | 62844105  |
| 1 | 66416 length 557 cvg_10.2_tip_1  | 1.28E-18    | 557  | 575 | 213480061 |
| 1 | 63052 length 453 cvg_9.0_tip_1   | 3.42E-40    | 453  | 549 | 207907988 |
| 1 | 73008 length 1447 cvg_9.0_tip_1  | 3.05671E-09 | 1447 | 836 | 59777337  |
| 1 | 73422 length 1913 cvg_8.0_tip_1  | 3.89728E-06 | 1913 | 639 | 282732458 |
| 1 | 73534 length 2137 cvg_9.0_tip_1  | 7.33945E-11 | 2137 | 493 | 3222962   |
| 1 | 67670 length 612 cvg_7.0_tip_1   | 6.76E-33    | 612  | 638 | 60524050  |
| 1 | 63296 length 460 cvg_7.0_tip_1   | 3.58392E-06 | 460  | 863 | 288272239 |
| 1 | 56816 length 341 cvg_6.0_tip_1   | 2.81494E-12 | 341  | 567 | 83431990  |
| 1 | 60154 length 394 cvg_5.0_tip_1   | 3.04388E-06 | 394  | 558 | 10870741  |
| 1 | 56574 length 338 cvg_4.0_tip_1   | 1.10176E-11 | 338  | 330 | 2237690   |
| 1 | 65674 length 531 cvg_8.8_tip_1   | 2.22E-29    | 531  | 814 | 34412226  |
| 1 | 68006 length 628 cvg_8.0_tip_1   | 3.41331E-13 | 628  | 534 | 79823713  |
| 1 | 69820 length 752 cvg_11.0_tip_1  | 6.1829E-09  | 752  | 690 | 62144149  |
| 1 | 60638 length 402 cvg_6.0_tip_1   | 9.15E-19    | 402  | 724 | 77992732  |
| 1 | 57712 length 354 cvg_8.0_tip_1   | 2.8211E-09  | 354  | 427 | 8364352   |
| 1 | 60978 length 409 cvg_6.0_tip_1   | 5.13373E-08 | 409  | 577 | 83263843  |
| 1 | 54752 length 314 cvg_4.0_tip_1   | 1.03E-48    | 314  | 507 | 27825727  |
| 1 | 68604 length 664 cvg_9.0_tip_1   | 3.61642E-13 | 664  | 608 | 31391944  |
| 1 | 70496 length 820 cvg_10.0_tip_1  | 6.50918E-06 | 820  | 654 | 305641686 |
| 1 | 57976 length 358 cvg_11.0_tip_1  | 4.45719E-08 | 358  | 515 | 19696880  |
| 1 | 68346 length 647 cvg_9.0_tip_1   | 6.44E-61    | 647  | 783 | 31889547  |
| 1 | 59748 length 387 cvg_6.0_tip_1   | 1.38E-54    | 387  | 632 | 62144681  |
| 1 | 59784 length 388 cvg_61.6_tip_1  | 0           | 388  | 636 | 114488428 |
| 1 | 53376 length 300 cvg_9.5_tip_1   | 2.27473E-06 | 300  | 463 | 2553534   |
| 1 | 53772 length 304 cvg_7.0_tip_1   | 2.30745E-06 | 304  | 381 | 282760009 |
| 1 | 71304 length 935 cvg_10.0_tip_1  | 1.254E-10   | 935  | 888 | 47010404  |
| 1 | 62396 length 438 cvg_8.0_tip_1   | 8.94651E-10 | 438  | 468 | 12271027  |
| 1 | 57588 length 352 cvg_5.0_tip_1   | 7.65E-16    | 352  | 288 | 6975958   |
| 1 | 71314 length 936 cvg_6.0_tip_1   | 1.95981E-09 | 936  | 639 | 213482504 |
| 1 | 69160 length 701 cvg_9.9_tip_1   | 8.08E-36    | 701  | 680 | 60607532  |
| 1 | 69504 length 727 cvg_5.0_tip_1   | 6.20061E-12 | 727  | 803 | 60575125  |
| 1 | 71034 length 899 cvg_7.0_tip_1   | 3.1658E-14  | 899  | 561 | 80485546  |
| 1 | 73706 length 2914 cvg_9.5_tip_1  | 2.63839E-14 | 2914 | 718 | 282752988 |
| 1 | 57408 length 350 cvg_7.0_tip_1   | 1.78531E-10 | 350  | 595 | 49898695  |
| 1 | 58270 length 362 cvg_7.0_tip_1   | 2.24E-25    | 362  | 635 | 13742062  |
| 1 | 59198 length 378 cvg_7.0_tip_1   | 2.43E-28    | 378  | 550 | 83435949  |
| 1 | 60536 length 400 cvg_8.0_tip_1   | 5.01434E-08 | 400  | 354 | 1321506   |
| 1 | 68532 length 660 cvg_7.0_tip_1   | 2.48E-20    | 660  | 819 | 60609007  |
| 1 | 58416 length 365 cvg_4.0_tip_1   | 3.14318E-15 | 365  | 414 | 12458618  |
| 1 | 73510 length 2076 cvg_10.0_tip_1 | 7.98E-20    | 2076 | 669 | 67564895  |
| 1 | 61584 length 421 cvg_5.0_tip_1   | 2.25533E-13 | 421  | 371 | 91725754  |
| 1 | 59208 length 379 cvg_7.8_tip_1   | 2.01792E-13 | 379  | 642 | 213472908 |
| 1 | 71294 length 933 cvg_10.5_tip_1  | 1.26E-47    | 933  | 757 | 282727029 |

|   |                                  |             |      |     |           |
|---|----------------------------------|-------------|------|-----|-----------|
| 1 | 71642 length 993 cvg_8.0_tip_1   | 8.2269E-09  | 993  | 536 | 33209799  |
| 1 | 73590 length 2310 cvg_9.8_tip_1  | 5.70E-21    | 2310 | 569 | 83479699  |
| 1 | 57170 length 346 cvg_4.0_tip_1   | 8.74E-28    | 346  | 802 | 15708322  |
| 1 | 71486 length 961 cvg_9.0_tip_1   | 7.66074E-06 | 961  | 760 | 62848620  |
| 1 | 71740 length 1010 cvg_7.8_tip_1  | 9.02767E-15 | 1010 | 667 | 60441011  |
| 1 | 58010 length 358 cvg_4.0_tip_1   | 1.76109E-07 | 358  | 265 | 7905044   |
| 1 | 57926 length 357 cvg_8.0_tip_1   | 1.43E-100   | 357  | 951 | 76381091  |
| 1 | 73006 length 1445 cvg_10.1_tip_1 | 0           | 1445 | 712 | 59810035  |
| 1 | 56164 length 332 cvg_7.0_tip_1   | 5.16E-26    | 332  | 408 | 60482625  |
| 1 | 61734 length 424 cvg_6.0_tip_1   | 3.68384E-15 | 424  | 308 | 12301882  |
| 1 | 71866 length 1033 cvg_8.0_tip_1  | 1.3373E-07  | 1033 | 794 | 67563794  |
| 1 | 65116 length 513 cvg_8.0_tip_1   | 1.01285E-06 | 513  | 506 | 45698237  |
| 1 | 69720 length 743 cvg_5.0_tip_1   | 3.76668E-07 | 743  | 637 | 62890061  |
| 1 | 68348 length 647 cvg_5.0_tip_1   | 2.17153E-11 | 647  | 566 | 86224623  |
| 1 | 65400 length 523 cvg_9.0_tip_1   | 2.82092E-13 | 523  | 608 | 31391944  |
| 1 | 59112 length 377 cvg_8.0_tip_1   | 2.00662E-13 | 377  | 588 | 115357513 |
| 1 | 69562 length 733 cvg_11.0_tip_1  | 2.59E-51    | 733  | 638 | 58032618  |
| 1 | 70554 length 828 cvg_9.0_tip_1   | 0           | 828  | 601 | 32273992  |
| 1 | 69148 length 701 cvg_8.8_tip_1   | 2.64E-20    | 701  | 578 | 83108620  |
| 1 | 72124 length 1096 cvg_8.0_tip_1  | 0           | 1096 | 803 | 62840583  |
| 1 | 67698 length 614 cvg_5.0_tip_1   | 1.98049E-08 | 614  | 568 | 28445240  |
| 1 | 62318 length 437 cvg_7.0_tip_1   | 8.92501E-10 | 437  | 316 | 318720    |
| 1 | 55714 length 326 cvg_9.0_tip_1   | 1.44E-72    | 326  | 664 | 60563913  |
| 1 | 53886 length 305 cvg_5.0_tip_1   | 9.867E-12   | 305  | 858 | 82971523  |
| 1 | 58900 length 373 cvg_4.8_tip_1   | 5.84E-26    | 373  | 655 | 50523853  |
| 1 | 70918 length 880 cvg_8.0_tip_1   | 2.98238E-11 | 880  | 485 | 52804561  |
| 1 | 61234 length 413 cvg_6.0_tip_1   | 9.07E-16    | 413  | 411 | 22919862  |
| 1 | 72292 length 1140 cvg_8.7_tip_1  | 6.54E-16    | 1140 | 650 | 76234974  |
| 1 | 62482 length 440 cvg_9.0_tip_1   | 1.13E-27    | 440  | 755 | 60612972  |
| 1 | 62698 length 445 cvg_8.0_tip_1   | 1.14E-27    | 445  | 531 | 60608085  |
| 1 | 69768 length 747 cvg_9.0_tip_1   | 4.41E-19    | 747  | 906 | 29494140  |
| 1 | 68062 length 632 cvg_10.0_tip_1  | 8.37375E-11 | 632  | 353 | 8264328   |
| 1 | 66072 length 544 cvg_8.0_tip_1   | 6.89832E-08 | 544  | 433 | 14439860  |
| 1 | 66122 length 546 cvg_7.0_tip_1   | 4.27139E-06 | 546  | 292 | 152010431 |
| 1 | 58082 length 359 cvg_10.0_tip_1  | 7.24753E-10 | 359  | 575 | 119531310 |
| 1 | 57542 length 351 cvg_8.0_tip_1   | 6.81333E-07 | 351  | 377 | 4482171   |
| 1 | 69468 length 724 cvg_5.0_tip_1   | 8.42E-73    | 724  | 767 | 67564902  |
| 1 | 55240 length 320 cvg_4.0_tip_1   | 6.4088E-10  | 320  | 533 | 12182038  |
| 1 | 57610 length 353 cvg_6.0_tip_1   | 3.15E-18    | 353  | 455 | 305633796 |
| 1 | 62032 length 430 cvg_7.0_tip_1   | 8.51E-44    | 430  | 712 | 5434998   |
| 1 | 59240 length 379 cvg_11.0_tip_1  | 3.27147E-15 | 379  | 747 | 21168606  |
| 1 | 54776 length 315 cvg_8.0_tip_1   | 2.39746E-06 | 315  | 320 | 42581837  |
| 1 | 61536 length 420 cvg_9.0_tip_1   | 1.33624E-08 | 420  | 577 | 78251542  |
| 1 | 70216 length 788 cvg_7.9_tip_1   | 2.66222E-11 | 788  | 699 | 49344242  |
| 1 | 61338 length 415 cvg_7.1_tip_1   | 5.21333E-08 | 415  | 818 | 23698306  |
| 1 | 57538 length 351 cvg_6.0_tip_1   | 2.79561E-09 | 351  | 502 | 82172814  |
| 1 | 53822 length 304 cvg_6.0_tip_1   | 6.0647E-10  | 304  | 321 | 14437112  |
| 1 | 63948 length 478 cvg_5.0_tip_1   | 9.80675E-10 | 478  | 661 | 15156582  |

|   |                                  |             |      |     |           |
|---|----------------------------------|-------------|------|-----|-----------|
| 1 | 61162 length 412 cvg_6.0_tip_1   | 1.35976E-11 | 412  | 920 | 28831635  |
| 1 | 54190 length 308 cvg_8.0_tip_1   | 2.34018E-06 | 308  | 629 | 60580091  |
| 1 | 72512 length 1210 cvg_10.0_tip_1 | 1.04547E-11 | 1210 | 469 | 92173405  |
| 1 | 70508 length 822 cvg_9.4_tip_1   | 4.3408E-10  | 822  | 543 | 83106084  |
| 1 | 69882 length 757 cvg_8.3_tip_0   | 6.22531E-09 | 757  | 381 | 282738133 |
| 1 | 71818 length 1024 cvg_10.0_tip_1 | 8.17526E-06 | 1024 | 680 | 60607532  |
| 1 | 66134 length 546 cvg_10.0_tip_1  | 8.05E-20    | 546  | 402 | 62805812  |
| 1 | 65964 length 541 cvg_7.0_tip_1   | 5.72E-30    | 541  | 685 | 60639015  |
| 1 | 63860 length 475 cvg_5.0_tip_1   | 3.99739E-12 | 475  | 113 | 41110936  |
| 1 | 53610 length 302 cvg_7.0_tip_1   | 2.29109E-06 | 302  | 369 | 18961729  |
| 1 | 67094 length 586 cvg_5.0_tip_1   | 3.05866E-10 | 586  | 732 | 62136324  |
| 1 | 59168 length 378 cvg_5.0_tip_1   | 7.37248E-07 | 378  | 663 | 23066935  |
| 1 | 66002 length 542 cvg_7.0_tip_1   | 7.13625E-11 | 542  | 567 | 81151350  |
| 1 | 70672 length 847 cvg_9.4_tip_1   | 4.03E-38    | 847  | 727 | 60436400  |
| 1 | 66696 length 568 cvg_4.0_tip_1   | 4.80019E-12 | 568  | 402 | 104302202 |
| 1 | 69860 length 755 cvg_11.0_tip_1  | 2.45299E-08 | 755  | 804 | 288290042 |
| 1 | 70118 length 779 cvg_11.0_tip_1  | 1.56268E-06 | 779  | 688 | 71966905  |
| 1 | 68236 length 641 cvg_7.0_tip_1   | 3.48665E-13 | 641  | 812 | 23697085  |
| 1 | 61834 length 426 cvg_7.0_tip_1   | 5.56545E-11 | 426  | 534 | 83557045  |
| 1 | 65412 length 523 cvg_6.9_tip_1   | 1.93E-165   | 523  | 403 | 60507746  |
| 1 | 71078 length 904 cvg_5.0_tip_1   | 8.05813E-15 | 904  | 443 | 5673726   |
| 1 | 64480 length 494 cvg_3.7_tip_1   | 2.76E-16    | 494  | 656 | 62137324  |
| 1 | 70046 length 772 cvg_8.0_tip_1   | 3.9184E-07  | 772  | 739 | 60626264  |
| 1 | 71902 length 1042 cvg_8.0_tip_1  | 8.97503E-12 | 1042 | 314 | 45768806  |
| 1 | 73412 length 1896 cvg_9.0_tip_1  | 1.09473E-15 | 1896 | 648 | 62139601  |
| 1 | 69112 length 699 cvg_10.0_tip_1  | 3.96E-16    | 699  | 875 | 30853346  |
| 1 | 54038 length 306 cvg_3.0_tip_1   | 4.91E-29    | 306  | 658 | 298954959 |
| 1 | 63330 length 461 cvg_7.0_tip_1   | 1.23E-30    | 461  | 472 | 60527204  |
| 1 | 63782 length 473 cvg_6.0_tip_1   | 3.83228E-09 | 473  | 578 | 78280470  |
| 1 | 73188 length 1567 cvg_8.3_tip_1  | 1.30952E-08 | 1567 | 615 | 62888921  |
| 1 | 57446 length 350 cvg_8.0_tip_1   | 8.20E-22    | 350  | 441 | 18821123  |
| 1 | 58334 length 364 cvg_5.0_tip_1   | 3.25E-18    | 364  | 768 | 77992131  |
| 1 | 72568 length 1232 cvg_10.0_tip_1 | 4.05146E-08 | 1232 | 515 | 83247266  |
| 1 | 70224 length 789 cvg_10.0_tip_1  | 1.14E-16    | 789  | 662 | 10910867  |
| 1 | 68214 length 640 cvg_6.0_tip_1   | 5.0391E-06  | 640  | 549 | 14447785  |
| 1 | 65676 length 531 cvg_5.0_tip_1   | 1.37E-27    | 531  | 528 | 18823006  |
| 1 | 56664 length 339 cvg_7.0_tip_1   | 2.59384E-06 | 339  | 453 | 114754920 |
| 1 | 67564 length 606 cvg_9.0_tip_1   | 3.16732E-10 | 606  | 861 | 21180201  |
| 1 | 71862 length 1032 cvg_10.0_tip_1 | 1.38738E-10 | 1032 | 631 | 213485337 |
| 1 | 70354 length 803 cvg_6.0_tip_1   | 5.52E-31    | 803  | 532 | 57700803  |
| 1 | 60508 length 400 cvg_8.0_tip_1   | 1.98123E-07 | 400  | 761 | 259800985 |
| 1 | 71302 length 934 cvg_9.0_tip_1   | 1.09E-35    | 934  | 808 | 114490769 |
| 1 | 72772 length 1313 cvg_10.0_tip_1 | 7.27797E-13 | 1313 | 617 | 60564903  |
| 1 | 56326 length 334 cvg_8.0_tip_1   | 2.75317E-12 | 334  | 351 | 60579862  |
| 1 | 63834 length 475 cvg_9.0_tip_1   | 5.01E-30    | 475  | 794 | 53707302  |
| 1 | 73526 length 2127 cvg_9.0_tip_0  | 4.6791E-12  | 2127 | 323 | 14445068  |
| 1 | 60484 length 399 cvg_6.0_tip_1   | 3.45475E-15 | 399  | 111 | 67567690  |
| 1 | 68554 length 661 cvg_5.0_tip_1   | 5.21061E-06 | 661  | 372 | 1212370   |

|   |                                  |             |      |      |           |
|---|----------------------------------|-------------|------|------|-----------|
| 1 | 73282 length 1690 cvg_9.9_tip_1  | 2.47E-16    | 1690 | 578  | 21771623  |
| 1 | 63440 length 464 cvg_5.0_tip_1   | 3.61665E-06 | 464  | 683  | 10839037  |
| 1 | 64418 length 492 cvg_9.0_tip_1   | 6.20982E-08 | 492  | 796  | 28280205  |
| 1 | 69310 length 713 cvg_6.0_tip_1   | 1.48113E-09 | 713  | 618  | 19025087  |
| 1 | 53326 length 300 cvg_9.5_tip_1   | 1.52E-47    | 300  | 727  | 62133069  |
| 1 | 65544 length 527 cvg_6.0_tip_1   | 2.78E-84    | 527  | 727  | 62133069  |
| 1 | 66168 length 548 cvg_6.0_tip_1   | 4.01E-37    | 548  | 547  | 60513968  |
| 1 | 64828 length 505 cvg_6.0_tip_1   | 1.32E-101   | 505  | 507  | 112767046 |
| 1 | 56002 length 330 cvg_6.0_tip_1   | 4.08576E-08 | 330  | 552  | 82134935  |
| 1 | 66900 length 577 cvg_5.0_tip_1   | 2.89825E-07 | 577  | 534  | 78308766  |
| 1 | 57772 length 355 cvg_6.0_tip_1   | 2.11E-22    | 355  | 804  | 302110699 |
| 1 | 57282 length 348 cvg_8.0_tip_1   | 9.13E-31    | 348  | 418  | 183147358 |
| 1 | 71112 length 909 cvg_4.0_tip_1   | 7.57E-46    | 909  | 536  | 47326377  |
| 1 | 65500 length 525 cvg_7.0_tip_1   | 2.62621E-07 | 525  | 869  | 51881803  |
| 1 | 63468 length 465 cvg_9.0_tip_1   | 2.25E-41    | 465  | 1364 | 199587352 |
| 1 | 62140 length 432 cvg_6.0_tip_1   | 3.51E-46    | 432  | 750  | 84583213  |
| 1 | 65444 length 524 cvg_5.0_tip_1   | 4.28E-46    | 524  | 695  | 62143782  |
| 1 | 55938 length 329 cvg_6.8_tip_1   | 2.60867E-09 | 329  | 630  | 288235737 |
| 1 | 70608 length 839 cvg_10.0_tip_1  | 6.66435E-06 | 839  | 920  | 34407724  |
| 1 | 65094 length 512 cvg_7.0_tip_1   | 3.99371E-06 | 512  | 581  | 9748413   |
| 1 | 66816 length 574 cvg_10.8_tip_1  | 2.99347E-10 | 574  | 771  | 62838286  |
| 1 | 56240 length 333 cvg_8.4_tip_1   | 2.96E-18    | 333  | 660  | 50655735  |
| 1 | 71128 length 912 cvg_9.0_tip_1   | 8.1313E-15  | 912  | 688  | 60434002  |
| 1 | 53942 length 305 cvg_8.0_tip_1   | 4.71E-26    | 305  | 641  | 104296258 |
| 1 | 71558 length 975 cvg_10.0_tip_1  | 8.07424E-09 | 975  | 942  | 82821741  |
| 1 | 72392 length 1168 cvg_8.0_tip_1  | 6.97E-19    | 1168 | 725  | 60559043  |
| 1 | 66906 length 577 cvg_9.0_tip_1   | 4.52457E-06 | 577  | 692  | 116839497 |
| 1 | 63158 length 456 cvg_6.0_tip_1   | 8.79E-78    | 456  | 766  | 84580504  |
| 1 | 63668 length 471 cvg_8.0_tip_1   | 3.81529E-09 | 471  | 339  | 40793074  |
| 1 | 68710 length 672 cvg_8.0_tip_1   | 1.01E-56    | 672  | 877  | 62919872  |
| 1 | 62424 length 439 cvg_7.0_tip_1   | 3.07E-34    | 439  | 621  | 11217050  |
| 1 | 62464 length 440 cvg_7.0_tip_1   | 4.99E-36    | 440  | 466  | 33271798  |
| 1 | 69864 length 755 cvg_4.0_tip_1   | 6.02E-43    | 755  | 794  | 112229223 |
| 1 | 53808 length 304 cvg_7.0_tip_1   | 0.000000584 | 304  | 565  | 20430275  |
| 1 | 68772 length 678 cvg_8.2_tip_1   | 2.27942E-11 | 678  | 676  | 40800667  |
| 1 | 64392 length 491 cvg_6.0_tip_1   | 5.37E-33    | 491  | 669  | 56274988  |
| 1 | 73440 length 1950 cvg_10.0_tip_1 | 6.68991E-11 | 1950 | 707  | 50630156  |
| 1 | 58834 length 372 cvg_9.0_tip_1   | 3.08849E-12 | 372  | 554  | 60590476  |
| 1 | 58512 length 367 cvg_8.0_tip_1   | 3.54E-24    | 367  | 698  | 60558484  |
| 1 | 71260 length 928 cvg_7.0_tip_1   | 3.80E-26    | 928  | 691  | 60440476  |
| 1 | 55678 length 326 cvg_8.0_tip_1   | 7.90E-25    | 326  | 731  | 282759073 |
| 1 | 67298 length 595 cvg_6.9_tip_1   | 9.57E-63    | 595  | 487  | 60636630  |
| 1 | 69046 length 695 cvg_9.0_tip_1   | 3.94E-16    | 695  | 801  | 282727888 |
| 1 | 72578 length 1235 cvg_9.0_tip_1  | 4.58E-54    | 1235 | 920  | 148752118 |
| 1 | 53654 length 302 cvg_4.0_tip_1   | 9.05238E-06 | 302  | 796  | 58299089  |
| 1 | 65366 length 522 cvg_4.8_tip_1   | 2.61052E-07 | 522  | 830  | 56396584  |
| 1 | 65962 length 541 cvg_9.0_tip_1   | 2.53E-38    | 541  | 690  | 33290179  |
| 1 | 71724 length 1008 cvg_8.7_tip_1  | 9.36E-18    | 1008 | 915  | 148753160 |



|   |                                  |             |      |     |           |
|---|----------------------------------|-------------|------|-----|-----------|
| 1 | 68658 length 669 cvg_5.8_tip_1   | 3.93E-19    | 669  | 600 | 282751687 |
| 1 | 71384 length 947 cvg_7.0_tip_1   | 2.139E-15   | 947  | 475 | 27826009  |
| 1 | 54846 length 316 cvg_3.1_tip_1   | 6.32278E-10 | 316  | 761 | 282750024 |
| 1 | 59462 length 383 cvg_5.0_tip_1   | 3.44E-18    | 383  | 488 | 282736403 |
| 1 | 61168 length 412 cvg_6.0_tip_1   | 2.20446E-13 | 412  | 482 | 60524674  |
| 1 | 56988 length 344 cvg_5.0_tip_1   | 6.66837E-07 | 344  | 834 | 23697081  |
| 1 | 67098 length 586 cvg_8.0_tip_1   | 2.30E-60    | 586  | 730 | 282754221 |
| 1 | 71700 length 1003 cvg_8.6_tip_1  | 8.63153E-12 | 1003 | 759 | 40404306  |
| 1 | 60574 length 401 cvg_5.9_tip_1   | 3.47307E-15 | 401  | 643 | 50515833  |
| 1 | 65370 length 522 cvg_8.0_tip_1   | 6.60703E-08 | 522  | 606 | 280972295 |
| 1 | 72050 length 1077 cvg_9.0_tip_1  | 2.17865E-06 | 1077 | 490 | 50449975  |
| 1 | 54584 length 312 cvg_7.0_tip_1   | 4.65E-23    | 312  | 617 | 60563611  |
| 1 | 64926 length 507 cvg_4.2_tip_1   | 1.03894E-09 | 507  | 406 | 50528609  |
| 1 | 61618 length 421 cvg_4.0_tip_1   | 1.26E-76    | 421  | 750 | 60632129  |
| 1 | 63410 length 463 cvg_8.0_tip_1   | 8.60E-75    | 463  | 370 | 84582368  |
| 1 | 65572 length 528 cvg_8.0_tip_1   | 2.47E-38    | 528  | 908 | 148752297 |
| 1 | 72336 length 1155 cvg_7.2_tip_1  | 1.92E-136   | 1155 | 783 | 56390895  |
| 1 | 72206 length 1114 cvg_11.0_tip_1 | 2.3419E-09  | 1114 | 701 | 62144855  |
| 1 | 73194 length 1577 cvg_8.5_tip_1  | 4.87E-39    | 1577 | 920 | 148752118 |
| 1 | 62972 length 452 cvg_6.0_tip_1   | 5.70415E-08 | 452  | 630 | 305633599 |
| 1 | 64568 length 496 cvg_5.5_tip_1   | 9.77706E-07 | 496  | 649 | 45762365  |
| 1 | 67454 length 601 cvg_10.1_tip_1  | 1.19474E-06 | 601  | 785 | 67564591  |
| 1 | 73490 length 2033 cvg_10.0_tip_1 | 1.04903E-06 | 2033 | 422 | 6139684   |
| 1 | 65010 length 510 cvg_7.9_tip_1   | 2.74757E-13 | 510  | 550 | 60559399  |
| 1 | 58610 length 368 cvg_4.0_tip_1   | 7.16539E-07 | 368  | 477 | 49687100  |
| 1 | 64364 length 490 cvg_8.0_tip_1   | 9.65304E-07 | 490  | 563 | 83225402  |
| 1 | 58406 length 365 cvg_6.0_tip_1   | 1.79778E-07 | 365  | 690 | 24784870  |
| 1 | 63696 length 471 cvg_4.0_tip_1   | 4.44E-21    | 471  | 799 | 34410677  |
| 1 | 66628 length 566 cvg_8.0_tip_1   | 2.84071E-07 | 566  | 442 | 7057110   |
| 1 | 71520 length 967 cvg_9.0_tip_1   | 1.57E-25    | 967  | 578 | 83108620  |
| 1 | 70312 length 798 cvg_8.0_tip_1   | 1.66359E-09 | 798  | 923 | 23703970  |
| 1 | 58784 length 371 cvg_5.0_tip_1   | 2.05E-16    | 371  | 592 | 154766852 |
| 1 | 72432 length 1178 cvg_9.0_tip_1  | 7.58E-25    | 1178 | 326 | 317413    |
| 1 | 71880 length 1035 cvg_10.0_tip_1 | 5.70954E-13 | 1035 | 451 | 50278601  |
| 1 | 63898 length 477 cvg_7.0_tip_1   | 3.72302E-06 | 477  | 689 | 60562230  |
| 1 | 72482 length 1197 cvg_9.0_tip_1  | 6.14178E-07 | 1197 | 516 | 148194085 |
| 1 | 73074 length 1495 cvg_10.0_tip_1 | 1.02E-101   | 1495 | 461 | 60637765  |
| 1 | 68564 length 662 cvg_4.7_tip_1   | 0           | 662  | 766 | 84580504  |
| 1 | 66148 length 547 cvg_8.0_tip_1   | 2.95632E-13 | 547  | 460 | 60631894  |
| 1 | 63622 length 469 cvg_59.4_tip_1  | 2.83E-22    | 469  | 610 | 50514989  |
| 1 | 67384 length 598 cvg_5.0_tip_1   | 2.42E-26    | 598  | 571 | 50450962  |
| 1 | 69408 length 721 cvg_9.0_tip_1   | 1.51E-46    | 721  | 486 | 104300537 |
| 1 | 70402 length 809 cvg_5.0_tip_1   | 7.75E-21    | 809  | 320 | 60567402  |
| 1 | 69342 length 716 cvg_8.0_tip_1   | 3.90979E-13 | 716  | 631 | 32209673  |
| 1 | 68048 length 631 cvg_4.0_tip_1   | 2.03746E-08 | 631  | 790 | 46170187  |
| 1 | 66944 length 579 cvg_6.0_tip_1   | 6.38E-33    | 579  | 461 | 71968176  |
| 1 | 58132 length 360 cvg_4.0_tip_1   | 2.76567E-06 | 360  | 666 | 167687185 |
| 1 | 57258 length 348 cvg_10.0_tip_1  | 6.7512E-07  | 348  | 890 | 31005517  |

|   |                                  |             |      |     |           |
|---|----------------------------------|-------------|------|-----|-----------|
| 1 | 54512 length 311 cvg_5.0_tip_1   | 3.98123E-11 | 311  | 751 | 83068226  |
| 1 | 70028 length 771 cvg_8.2_tip_1   | 1.62E-46    | 771  | 819 | 60609007  |
| 1 | 70384 length 806 cvg_5.0_tip_1   | 4.09627E-07 | 806  | 772 | 74373529  |
| 1 | 65862 length 537 cvg_3.0_tip_1   | 4.39E-46    | 537  | 557 | 83530277  |
| 1 | 62160 length 433 cvg_7.0_tip_1   | 5.66188E-11 | 433  | 623 | 112766892 |
| 1 | 71628 length 991 cvg_7.9_tip_1   | 2.07787E-09 | 991  | 159 | 84959392  |
| 1 | 62234 length 434 cvg_4.0_tip_1   | 6.85E-26    | 434  | 531 | 83257467  |
| 1 | 62708 length 445 cvg_4.0_tip_1   | 1.42018E-08 | 445  | 328 | 84913243  |
| 1 | 66174 length 548 cvg_4.0_tip_1   | 1.71E-42    | 548  | 653 | 207865143 |
| 1 | 55404 length 322 cvg_4.0_tip_1   | 4.16E-48    | 322  | 382 | 60526114  |
| 1 | 53386 length 300 cvg_5.0_tip_1   | 9.33354E-09 | 300  | 539 | 83243364  |
| 1 | 58524 length 367 cvg_6.0_tip_1   | 7.41958E-10 | 367  | 787 | 15192123  |
| 1 | 63712 length 472 cvg_5.0_tip_1   | 2.44936E-10 | 472  | 424 | 13659904  |
| 1 | 57366 length 349 cvg_4.0_tip_1   | 4.50471E-11 | 349  | 566 | 74261861  |
| 1 | 69878 length 756 cvg_8.0_tip_1   | 1.13E-19    | 756  | 655 | 62837149  |
| 1 | 72694 length 1270 cvg_10.0_tip_1 | 7.59E-19    | 1270 | 580 | 60582450  |
| 1 | 72310 length 1148 cvg_9.6_tip_1  | 9.90864E-12 | 1148 | 698 | 18992455  |
| 1 | 69818 length 751 cvg_5.0_tip_1   | 2.53346E-11 | 751  | 814 | 259801050 |
| 1 | 66858 length 575 cvg_6.0_tip_1   | 0.000001141 | 575  | 710 | 54536780  |
| 1 | 71440 length 955 cvg_8.0_tip_1   | 2.33E-21    | 955  | 766 | 67563958  |
| 1 | 61824 length 425 cvg_4.0_tip_1   | 5.55168E-11 | 425  | 481 | 9513774   |
| 1 | 72176 length 1107 cvg_5.0_tip_1  | 2.24066E-06 | 1107 | 565 | 83231497  |
| 1 | 69108 length 699 cvg_5.0_tip_1   | 7.19E-27    | 699  | 585 | 282723855 |
| 1 | 57916 length 357 cvg_4.0_tip_1   | 8.38E-22    | 357  | 767 | 67564902  |
| 1 | 73244 length 1631 cvg_63.8_tip_0 | 4.05E-58    | 1631 | 407 | 60518838  |
| 1 | 56780 length 341 cvg_5.0_tip_1   | 1.82E-50    | 341  | 571 | 80956353  |
| 1 | 57266 length 348 cvg_5.0_tip_1   | 4.66373E-14 | 348  | 613 | 108851421 |
| 1 | 70912 length 880 cvg_5.0_tip_1   | 4.87E-50    | 880  | 614 | 183131176 |
| 1 | 72556 length 1227 cvg_5.0_tip_1  | 6.79277E-13 | 1227 | 616 | 289589089 |
| 1 | 72626 length 1247 cvg_9.8_tip_1  | 4.42344E-14 | 1247 | 314 | 60589734  |
| 1 | 56342 length 334 cvg_7.0_tip_1   | 2.55293E-06 | 334  | 842 | 108846291 |
| 1 | 53930 length 305 cvg_4.0_tip_1   | 4.04858E-14 | 305  | 457 | 5364612   |
| 1 | 62406 length 438 cvg_5.0_tip_1   | 6.47E-57    | 438  | 580 | 28149385  |
| 1 | 57128 length 346 cvg_8.0_tip_1   | 2.65112E-06 | 346  | 892 | 54500750  |
| 1 | 66310 length 553 cvg_9.0_tip_1   | 1.13768E-09 | 553  | 591 | 8611640   |
| 1 | 63780 length 473 cvg_9.0_tip_1   | 3.97974E-12 | 473  | 762 | 146287074 |
| 1 | 53618 length 302 cvg_6.0_tip_1   | 7.00E-22    | 302  | 823 | 18986940  |
| 1 | 72306 length 1146 cvg_9.8_tip_1  | 1.60354E-13 | 1146 | 689 | 6360679   |
| 1 | 55438 length 322 cvg_4.0_tip_1   | 5.59E-35    | 322  | 857 | 74542711  |
| 1 | 73374 length 1827 cvg_11.0_tip_1 | 1.44E-76    | 1827 | 594 | 302096992 |
| 1 | 60076 length 393 cvg_8.0_tip_1   | 2.01936E-10 | 393  | 759 | 282724412 |
| 1 | 61080 length 411 cvg_7.9_tip_1   | 2.46E-22    | 411  | 677 | 60564847  |
| 1 | 58536 length 367 cvg_10.0_tip_1  | 9.66E-31    | 367  | 955 | 269808945 |
| 1 | 57072 length 345 cvg_9.4_tip_1   | 2.98E-52    | 345  | 768 | 84584849  |
| 1 | 66886 length 577 cvg_9.0_tip_1   | 2.11E-91    | 577  | 606 | 62848494  |
| 1 | 70684 length 847 cvg_9.5_tip_1   | 4.90E-90    | 847  | 789 | 60572623  |
| 1 | 54474 length 311 cvg_8.0_tip_1   | 4.17E-51    | 311  | 537 | 62844649  |
| 1 | 60872 length 407 cvg_7.0_tip_1   | 1.57E-60    | 407  | 408 | 282759689 |

|   |                                  |             |      |      |           |
|---|----------------------------------|-------------|------|------|-----------|
| 1 | 73516 length 2096 cvg_16.0_tip_1 | 5.36E-24    | 2096 | 578  | 60557987  |
| 1 | 59070 length 376 cvg_8.0_tip_1   | 6.40E-69    | 376  | 546  | 146067441 |
| 1 | 68262 length 643 cvg_5.0_tip_1   | 2.40E-165   | 643  | 623  | 18818230  |
| 1 | 65816 length 536 cvg_9.9_tip_1   | 1.10119E-09 | 536  | 780  | 282753531 |
| 1 | 66714 length 569 cvg_7.0_tip_1   | 1.23E-49    | 569  | 734  | 67563072  |
| 1 | 62654 length 444 cvg_8.0_tip_1   | 4.85E-33    | 444  | 524  | 221026382 |
| 1 | 64246 length 487 cvg_7.0_tip_1   | 3.78953E-06 | 487  | 411  | 10901061  |
| 1 | 58866 length 373 cvg_7.0_tip_1   | 2.22E-22    | 373  | 1241 | 199585096 |
| 1 | 72210 length 1116 cvg_10.0_tip_1 | 1.17E-63    | 1116 | 593  | 18823386  |
| 1 | 64448 length 493 cvg_7.2_tip_1   | 1.10E-52    | 493  | 594  | 49688673  |
| 1 | 61340 length 415 cvg_8.0_tip_1   | 0           | 415  | 599  | 50640430  |
| 1 | 72376 length 1164 cvg_8.0_tip_1  | 0           | 1164 | 768  | 148753261 |
| 1 | 68350 length 647 cvg_8.7_tip_1   | 2.43E-20    | 647  | 536  | 84582068  |
| 1 | 65388 length 522 cvg_8.0_tip_1   | 1.25E-21    | 522  | 821  | 62842043  |
| 1 | 67762 length 616 cvg_8.0_tip_1   | 1.73E-70    | 616  | 463  | 18822765  |
| 1 | 66040 length 543 cvg_8.3_tip_1   | 6.78E-116   | 543  | 600  | 50523177  |
| 1 | 66314 length 553 cvg_7.0_tip_1   | 2.24E-63    | 553  | 732  | 62137927  |
| 1 | 71176 length 919 cvg_9.0_tip_1   | 1.50E-62    | 919  | 888  | 282723044 |
| 1 | 70412 length 810 cvg_10.0_tip_1  | 0           | 810  | 688  | 60554344  |
| 1 | 70722 length 852 cvg_10.0_tip_1  | 0           | 852  | 779  | 23697977  |
| 1 | 73076 length 1497 cvg_8.0_tip_1  | 1.24E-153   | 1497 | 396  | 1961362   |
| 1 | 69006 length 693 cvg_6.0_tip_1   | 1.26E-71    | 693  | 710  | 282759551 |
| 1 | 68948 length 688 cvg_5.0_tip_1   | 1.37458E-06 | 688  | 597  | 94973526  |
| 1 | 71496 length 963 cvg_9.0_tip_1   | 3.27122E-11 | 963  | 938  | 82962140  |
| 1 | 58112 length 360 cvg_9.0_tip_1   | 7.22E-155   | 360  | 695  | 154475852 |
| 1 | 68724 length 673 cvg_9.5_tip_1   | 1.22E-71    | 673  | 733  | 302107694 |
| 1 | 73058 length 1485 cvg_9.0_tip_1  | 1.39E-17    | 1485 | 758  | 13729743  |
| 1 | 72564 length 1231 cvg_9.0_tip_1  | 2.52E-43    | 1231 | 622  | 50524526  |
| 1 | 71250 length 927 cvg_9.0_tip_1   | 1.39E-19    | 927  | 504  | 10733186  |
| 1 | 72634 length 1249 cvg_9.3_tip_1  | 1.06E-119   | 1249 | 690  | 60437929  |
| 1 | 64274 length 488 cvg_3.0_tip_1   | 5.14E-30    | 488  | 339  | 60564282  |
| 1 | 55670 length 326 cvg_6.0_tip_1   | 4.38E-51    | 326  | 547  | 60513968  |
| 1 | 60208 length 395 cvg_4.0_tip_1   | 5.18E-48    | 395  | 547  | 60513968  |
| 1 | 68436 length 652 cvg_8.6_tip_1   | 6.95E-30    | 652  | 547  | 60513968  |
| 1 | 72684 length 1263 cvg_10.0_tip_1 | 1.11E-85    | 1263 | 837  | 62843945  |
| 1 | 66150 length 547 cvg_8.0_tip_1   | 4.98E-18    | 547  | 576  | 13461745  |
| 1 | 64466 length 493 cvg_6.8_tip_1   | 6.04E-42    | 493  | 531  | 60539381  |
| 1 | 60776 length 405 cvg_7.0_tip_1   | 2.61E-28    | 405  | 637  | 60554873  |
| 1 | 58070 length 359 cvg_6.0_tip_1   | 5.28E-94    | 359  | 738  | 60433827  |
| 1 | 56992 length 344 cvg_4.9_tip_1   | 1.85E-87    | 344  | 726  | 60607782  |
| 1 | 53630 length 302 cvg_5.0_tip_1   | 7.61E-65    | 302  | 696  | 60436585  |
| 1 | 63000 length 452 cvg_8.0_tip_1   | 8.07E-72    | 452  | 499  | 18821599  |
| 1 | 55476 length 323 cvg_10.0_tip_1  | 1.79E-90    | 323  | 439  | 60436096  |
| 1 | 59390 length 382 cvg_6.6_tip_1   | 1.86E-115   | 382  | 650  | 60641094  |
| 1 | 71016 length 895 cvg_10.9_tip_1  | 5.94E-28    | 895  | 738  | 60433827  |
| 1 | 66660 length 567 cvg_8.0_tip_1   | 2.34E-137   | 567  | 636  | 60542690  |
| 1 | 63778 length 473 cvg_7.0_tip_1   | 4.46E-21    | 473  | 570  | 50692328  |
| 1 | 73420 length 1911 cvg_9.0_tip_1  | 5.07E-27    | 1911 | 570  | 50692328  |

|   |                                  |             |      |      |           |
|---|----------------------------------|-------------|------|------|-----------|
| 1 | 68566 length 662 cvg_7.0_tip_1   | 7.50E-144   | 662  | 726  | 60607782  |
| 1 | 57152 length 346 cvg_5.0_tip_1   | 7.63E-90    | 346  | 751  | 56270157  |
| 1 | 57936 length 357 cvg_3.9_tip_1   | 8.51E-96    | 357  | 726  | 60607782  |
| 1 | 58280 length 363 cvg_6.9_tip_1   | 9.20E-28    | 363  | 586  | 60441045  |
| 1 | 68176 length 638 cvg_8.0_tip_1   | 2.38E-165   | 638  | 346  | 60556684  |
| 1 | 66468 length 559 cvg_18.0_tip_1  | 9.67E-69    | 559  | 701  | 60441686  |
| 1 | 54900 length 316 cvg_5.0_tip_1   | 3.41E-70    | 316  | 753  | 302091478 |
| 1 | 60806 length 406 cvg_7.0_tip_1   | 3.19E-80    | 406  | 801  | 56391575  |
| 1 | 66152 length 547 cvg_8.0_tip_1   | 3.46E-62    | 547  | 418  | 86239555  |
| 1 | 61266 length 414 cvg_7.0_tip_1   | 7.88E-41    | 414  | 792  | 67562667  |
| 1 | 71252 length 927 cvg_8.0_tip_1   | 3.17E-48    | 927  | 562  | 50454799  |
| 1 | 66074 length 544 cvg_6.5_tip_1   | 1.09E-43    | 544  | 571  | 47438152  |
| 1 | 68824 length 681 cvg_5.0_tip_1   | 3.37E-78    | 681  | 766  | 84580504  |
| 1 | 67782 length 617 cvg_8.0_tip_1   | 3.04E-78    | 617  | 570  | 80839455  |
| 1 | 61278 length 414 cvg_9.0_tip_1   | 5.24E-45    | 414  | 855  | 40798749  |
| 1 | 57026 length 344 cvg_6.0_tip_1   | 1.50E-143   | 344  | 793  | 23701946  |
| 1 | 57042 length 345 cvg_6.0_tip_1   | 2.21E-28    | 345  | 688  | 27835407  |
| 1 | 72134 length 1098 cvg_6.0_tip_1  | 1.11E-60    | 1098 | 645  | 182486468 |
| 1 | 73276 length 1681 cvg_8.0_tip_1  | 0           | 1681 | 834  | 40797744  |
| 1 | 73250 length 1648 cvg_10.0_tip_1 | 2.85E-102   | 1648 | 640  | 29262499  |
| 1 | 61208 length 413 cvg_6.0_tip_1   | 0           | 413  | 436  | 15080829  |
| 1 | 64620 length 498 cvg_8.0_tip_1   | 3.02E-59    | 498  | 569  | 182468752 |
| 1 | 61246 length 414 cvg_5.0_tip_1   | 4.54E-70    | 414  | 551  | 282732324 |
| 1 | 68336 length 647 cvg_9.3_tip_1   | 8.71E-85    | 647  | 602  | 29256349  |
| 1 | 57970 length 358 cvg_6.0_tip_1   | 5.38E-23    | 358  | 573  | 182585177 |
| 1 | 68094 length 634 cvg_7.9_tip_1   | 2.90E-72    | 634  | 505  | 18822969  |
| 1 | 54372 length 310 cvg_7.0_tip_1   | 2.70E-126   | 310  | 737  | 34409125  |
| 1 | 63240 length 459 cvg_5.0_tip_1   | 1.77E-23    | 459  | 772  | 84582250  |
| 1 | 63766 length 473 cvg_6.9_tip_1   | 9.33985E-07 | 473  | 822  | 154538039 |
| 1 | 66206 length 549 cvg_8.0_tip_1   | 1.17254E-12 | 549  | 868  | 60970020  |
| 1 | 60762 length 405 cvg_6.9_tip_1   | 1.28588E-08 | 405  | 281  | 215281027 |
| 1 | 62684 length 445 cvg_9.0_tip_1   | 9.81E-16    | 445  | 535  | 80485888  |
| 1 | 64986 length 509 cvg_5.0_tip_1   | 4.12193E-09 | 509  | 672  | 49898699  |
| 1 | 63148 length 456 cvg_5.0_tip_1   | 2.29E-44    | 456  | 408  | 762381    |
| 1 | 60124 length 393 cvg_8.0_tip_1   | 3.03569E-06 | 393  | 1071 | 15945998  |
| 1 | 62202 length 434 cvg_7.0_tip_1   | 3.37118E-06 | 434  | 58   | 60561023  |
| 1 | 62562 length 442 cvg_5.0_tip_1   | 3.09E-34    | 442  | 407  | 60718932  |
| 1 | 63136 length 456 cvg_8.0_tip_1   | 4.99E-33    | 456  | 768  | 112763070 |
| 1 | 64816 length 504 cvg_8.0_tip_1   | 1.30E-27    | 504  | 496  | 56397332  |
| 1 | 66146 length 547 cvg_5.9_tip_1   | 3.85E-34    | 547  | 748  | 67564722  |
| 1 | 65968 length 541 cvg_8.0_tip_1   | 1.07072E-06 | 541  | 662  | 159710399 |
| 1 | 56520 length 337 cvg_5.0_tip_1   | 2.57748E-06 | 337  | 743  | 62848333  |
| 1 | 67264 length 593 cvg_9.0_tip_1   | 0           | 593  | 608  | 26018097  |
| 1 | 57340 length 349 cvg_6.0_tip_1   | 0           | 349  | 918  | 23703702  |
| 1 | 72724 length 1283 cvg_5.0_tip_1  | 3.19E-95    | 1283 | 861  | 84586461  |
| 1 | 66682 length 568 cvg_6.0_tip_1   | 5.02E-52    | 568  | 545  | 60539453  |
| 1 | 54452 length 311 cvg_6.0_tip_1   | 4.88E-100   | 311  | 695  | 62143782  |
| 1 | 57498 length 351 cvg_5.0_tip_1   | 1.85966E-13 | 351  | 695  | 62143782  |

|   |                                 |             |      |     |           |
|---|---------------------------------|-------------|------|-----|-----------|
| 1 | 63350 length 462 cvg_9.0_tip_1  | 3.26E-71    | 462  | 807 | 60636807  |
| 1 | 67896 length 621 cvg_8.0_tip_1  | 3.24881E-10 | 621  | 491 | 62139496  |
| 1 | 58400 length 365 cvg_3.0_tip_1  | 1.15158E-08 | 365  | 598 | 56392203  |
| 1 | 66110 length 545 cvg_7.8_tip_1  | 4.59761E-12 | 545  | 527 | 282747991 |
| 1 | 71984 length 1062 cvg_8.0_tip_1 | 1.79E-28    | 1062 | 341 | 60436803  |
| 1 | 65844 length 537 cvg_7.0_tip_1  | 1.55E-36    | 537  | 850 | 82978637  |
| 1 | 70978 length 891 cvg_11.4_tip_1 | 4.71567E-10 | 891  | 882 | 59783258  |
| 1 | 68904 length 686 cvg_9.0_tip_1  | 3.37E-41    | 686  | 816 | 62844105  |
| 1 | 59120 length 377 cvg_9.7_tip_1  | 1.28536E-14 | 377  | 513 | 282729549 |
| 1 | 69104 length 698 cvg_8.0_tip_1  | 8.93737E-08 | 698  | 460 | 60441229  |
| 1 | 58126 length 360 cvg_9.0_tip_1  | 1.06E-39    | 360  | 792 | 67562667  |
| 1 | 57956 length 357 cvg_4.8_tip_1  | 4.61492E-11 | 357  | 466 | 92101406  |
| 1 | 59970 length 391 cvg_4.0_tip_1  | 3.25615E-12 | 391  | 505 | 60560482  |
| 1 | 55264 length 320 cvg_9.0_tip_1  | 3.22E-101   | 320  | 319 | 104300267 |
| 1 | 65600 length 528 cvg_7.0_tip_1  | 8.08E-23    | 528  | 853 | 282752444 |
| 1 | 61192 length 412 cvg_5.0_tip_1  | 3.44146E-12 | 412  | 898 | 148752116 |
| 1 | 64802 length 504 cvg_8.0_tip_1  | 7.41E-20    | 504  | 783 | 148752169 |
| 1 | 66190 length 548 cvg_8.0_tip_1  | 8.08E-20    | 548  | 684 | 282756500 |
| 1 | 69512 length 728 cvg_6.0_tip_1  | 3.68821E-07 | 728  | 813 | 61011700  |
| 1 | 58894 length 373 cvg_2.9_tip_1  | 5.42E-20    | 373  | 734 | 62116513  |
| 1 | 67516 length 604 cvg_10.0_tip_1 | 3.30E-50    | 604  | 630 | 60438260  |
| 1 | 69810 length 750 cvg_5.0_tip_1  | 1.50273E-06 | 750  | 568 | 282753485 |
| 1 | 63396 length 463 cvg_7.0_tip_1  | 4.20E-18    | 463  | 753 | 62143727  |
| 1 | 68010 length 628 cvg_8.0_tip_1  | 1.40053E-15 | 628  | 383 | 104298965 |
| 1 | 60244 length 395 cvg_6.0_tip_1  | 8.33041E-13 | 395  | 527 | 282747991 |
| 1 | 57276 length 348 cvg_4.0_tip_1  | 0           | 348  | 684 | 60539517  |
| 1 | 68868 length 684 cvg_9.0_tip_1  | 3.59108E-10 | 684  | 676 | 50682034  |
| 1 | 53660 length 302 cvg_4.0_tip_1  | 2.29109E-06 | 302  | 474 | 157990322 |
| 1 | 59992 length 391 cvg_6.0_tip_1  | 1.57E-63    | 391  | 778 | 60613376  |
| 1 | 63374 length 462 cvg_10.0_tip_1 | 2.39493E-10 | 462  | 441 | 209426428 |
| 1 | 64148 length 484 cvg_9.0_tip_1  | 1.08E-89    | 484  | 617 | 84582449  |
| 1 | 70060 length 773 cvg_9.0_tip_1  | 2.26E-36    | 773  | 761 | 60634008  |
| 1 | 63340 length 462 cvg_7.0_tip_1  | 1.85E-26    | 462  | 898 | 148752168 |
| 1 | 71980 length 1061 cvg_9.0_tip_1 | 1.37437E-07 | 1061 | 719 | 160592757 |

---
