# Supplementary material for: Genome Analysis of the Domestic Dog (Korean Jindo) by Massively Parallel Sequencing
Source: PubMed Central journal article supplement — DNA Res. 2012 Apr 3;19(3):275–88. doi: 10.1093/dnares/dss011 (PMC3372376; doi:10.1093/dnares/dss011), 2012-04-03
Supplement: supp_dss011_dss011supp_table5.pdf [file supp_dss011_dss011supp_table5.pdf]

Supplementary Table 5. 862 contigs (derived from unmapped reads) were matched to the NR-protein database but unmatched to the NR-nucleotide database

| rank | contig_id                       | pscore      | query_length | target_length | target_accession |
|------|---------------------------------|-------------|--------------|---------------|------------------|
| 1    | 53360 length 300 cvg_3.0_tip_1  | 1.43516E-12 | 300          | 3404          | 83317874         |
| 1    | 53380 length 300 cvg_4.0_tip_1  | 2.89174E-13 | 300          | 3404          | 83317874         |
| 1    | 53382 length 300 cvg_4.9_tip_1  | 1.53333E-14 | 300          | 3404          | 83317874         |
| 1    | 53384 length 300 cvg_6.0_tip_1  | 1.80888E-07 | 300          | 3404          | 83317874         |
| 1    | 53432 length 301 cvg_6.0_tip_1  | 2.13676E-08 | 301          | 338           | 7443351          |
| 1    | 53452 length 301 cvg_5.0_tip_1  | 4.59996E-11 | 301          | 68            | 113195393        |
| 1    | 53524 length 301 cvg_5.1_tip_0  | 1.58098E-11 | 301          | 3404          | 83317874         |
| 1    | 53534 length 301 cvg_4.0_tip_0  | 1.02476E-10 | 301          | 68            | 113195393        |
| 1    | 53538 length 301 cvg_5.1_tip_1  | 6.00773E-11 | 301          | 3404          | 83317874         |
| 1    | 53590 length 302 cvg_4.0_tip_1  | 2.13676E-08 | 302          | 3404          | 83317874         |
| 1    | 53662 length 302 cvg_5.0_tip_1  | 4.59996E-11 | 302          | 3404          | 83317874         |
| 1    | 53740 length 303 cvg_5.0_tip_1  | 3.76301E-13 | 303          | 3404          | 83317874         |
| 1    | 53744 length 303 cvg_4.0_tip_1  | 7.09672E-12 | 303          | 3404          | 83317874         |
| 1    | 53766 length 304 cvg_6.0_tip_1  | 4.75E-16    | 304          | 1716          | 301755346        |
| 1    | 53814 length 304 cvg_3.0_tip_1  | 6.39531E-13 | 304          | 3404          | 83317874         |
| 1    | 53848 length 305 cvg_4.8_tip_0  | 1.3335E-10  | 305          | 68            | 113195393        |
| 1    | 53876 length 305 cvg_6.0_tip_1  | 5.0673E-10  | 305          | 3404          | 83317874         |
| 1    | 53878 length 305 cvg_4.0_tip_1  | 5.98582E-11 | 305          | 3404          | 83317874         |
| 1    | 53892 length 305 cvg_7.0_tip_1  | 3.28E-17    | 305          | 3404          | 83317874         |
| 1    | 54010 length 306 cvg_4.8_tip_0  | 2.19804E-13 | 306          | 338           | 7443351          |
| 1    | 54028 length 306 cvg_5.0_tip_0  | 1.34475E-08 | 306          | 68            | 113195393        |
| 1    | 54052 length 307 cvg_5.1_tip_1  | 1.37491E-07 | 307          | 3404          | 83317874         |
| 1    | 54084 length 307 cvg_4.7_tip_1  | 4.13014E-12 | 307          | 3404          | 83317874         |
| 1    | 54126 length 308 cvg_7.0_tip_1  | 3.27251E-09 | 308          | 241           | 297269899        |
| 1    | 54138 length 308 cvg_8.0_tip_1  | 2.67708E-11 | 308          | 3404          | 83317874         |
| 1    | 54164 length 308 cvg_4.0_tip_1  | 6.80779E-15 | 308          | 3404          | 83317874         |
| 1    | 54184 length 308 cvg_4.0_tip_1  | 3.38651E-06 | 308          | 3404          | 83317874         |
| 1    | 54210 length 308 cvg_7.0_tip_1  | 1.73523E-10 | 308          | 3404          | 83317874         |
| 1    | 54226 length 309 cvg_2.4_tip_1  | 2.11338E-08 | 309          | 1153          | 322504193        |
| 1    | 54242 length 309 cvg_4.0_tip_1  | 1.20169E-11 | 309          | 68            | 113195393        |
| 1    | 54268 length 309 cvg_3.0_tip_1  | 5.03021E-10 | 309          | 3404          | 83317874         |
| 1    | 54280 length 309 cvg_6.5_tip_0  | 1.98536E-06 | 309          | 229           | 322507045        |
| 1    | 54284 length 309 cvg_7.0_tip_0  | 2.67708E-11 | 309          | 3404          | 83317874         |
| 1    | 54306 length 309 cvg_5.0_tip_1  | 5.39413E-12 | 309          | 3404          | 83317874         |
| 1    | 54314 length 309 cvg_13.4_tip_1 | 9.48656E-09 | 309          | 3404          | 83317874         |
| 1    | 54318 length 309 cvg_11.0_tip_0 | 1.16393E-06 | 309          | 68            | 113195393        |
| 1    | 54334 length 309 cvg_8.0_tip_1  | 4.27403E-09 | 309          | 3404          | 83317874         |
| 1    | 54338 length 309 cvg_3.1_tip_1  | 6.82359E-07 | 309          | 3404          | 83317874         |
| 1    | 54346 length 310 cvg_5.9_tip_0  | 2.12E-16    | 310          | 3404          | 83317874         |
| 1    | 54404 length 310 cvg_6.1_tip_1  | 2.11338E-08 | 310          | 68            | 113195393        |
| 1    | 54410 length 310 cvg_6.0_tip_1  | 2.66725E-11 | 310          | 3404          | 83317874         |
| 1    | 54482 length 311 cvg_6.0_tip_1  | 1.56369E-11 | 311          | 3404          | 83317874         |
| 1    | 54492 length 311 cvg_3.0_tip_1  | 5.74196E-14 | 311          | 68            | 113195393        |
| 1    | 54544 length 312 cvg_8.0_tip_1  | 9.13339E-12 | 312          | 527           | 170040829        |
| 1    | 54580 length 312 cvg_4.0_tip_1  | 1.32374E-10 | 312          | 3404          | 83317874         |

|   |                                 |             |     |      |           |
|---|---------------------------------|-------------|-----|------|-----------|
| 1 | 54590 length 312 cvg_7.0_tip_1  | 2.18194E-13 | 312 | 3404 | 83317874  |
| 1 | 54662 length 313 cvg_6.0_tip_1  | 2.24E-18    | 313 | 3404 | 83317874  |
| 1 | 54680 length 313 cvg_9.1_tip_0  | 5.74196E-14 | 313 | 3404 | 83317874  |
| 1 | 54714 length 314 cvg_5.0_tip_1  | 9.75819E-14 | 314 | 3404 | 83317874  |
| 1 | 54718 length 314 cvg_3.5_tip_1  | 6.54543E-10 | 314 | 209  | 170573162 |
| 1 | 54724 length 314 cvg_3.0_tip_1  | 3.35384E-14 | 314 | 131  | 242069637 |
| 1 | 54750 length 314 cvg_5.0_tip_1  | 8.26081E-13 | 314 | 68   | 113195393 |
| 1 | 54764 length 315 cvg_6.0_tip_1  | 8.26081E-13 | 315 | 3404 | 83317874  |
| 1 | 54774 length 315 cvg_7.0_tip_1  | 7.48893E-06 | 315 | 3404 | 83317874  |
| 1 | 54810 length 315 cvg_4.0_tip_1  | 6.31E-16    | 315 | 3404 | 83317874  |
| 1 | 54814 length 315 cvg_5.0_tip_1  | 7.48893E-06 | 315 | 1153 | 322504193 |
| 1 | 54836 length 316 cvg_5.2_tip_1  | 1.55792E-11 | 316 | 3404 | 83317874  |
| 1 | 54840 length 316 cvg_7.0_tip_1  | 8.25935E-08 | 316 | 209  | 170573162 |
| 1 | 54870 length 316 cvg_12.5_tip_0 | 1.15E-17    | 316 | 3404 | 83317874  |
| 1 | 54884 length 316 cvg_6.0_tip_1  | 3.36163E-06 | 316 | 3404 | 83317874  |
| 1 | 54932 length 316 cvg_11.7_tip_1 | 2.10034E-11 | 316 | 3404 | 83317874  |
| 1 | 54958 length 317 cvg_6.0_tip_1  | 5.71978E-09 | 317 | 3404 | 83317874  |
| 1 | 54972 length 317 cvg_5.0_tip_1  | 2.8387E-08  | 317 | 68   | 113195393 |
| 1 | 55002 length 317 cvg_5.9_tip_1  | 1.40557E-15 | 317 | 3404 | 83317874  |
| 1 | 55012 length 317 cvg_8.0_tip_1  | 1.23134E-11 | 317 | 3404 | 83317874  |
| 1 | 55042 length 318 cvg_8.0_tip_1  | 3.35325E-09 | 318 | 3404 | 83317874  |
| 1 | 55070 length 318 cvg_9.5_tip_1  | 3.03289E-10 | 318 | 323  | 297714508 |
| 1 | 55086 length 318 cvg_4.0_tip_1  | 1.89265E-12 | 318 | 3404 | 83317874  |
| 1 | 55098 length 318 cvg_3.0_tip_1  | 1.50521E-09 | 318 | 3404 | 83317874  |
| 1 | 55100 length 318 cvg_7.0_tip_1  | 2.38866E-15 | 318 | 3404 | 83317874  |
| 1 | 55132 length 319 cvg_5.0_tip_1  | 4.21638E-12 | 319 | 3404 | 83317874  |
| 1 | 55144 length 319 cvg_3.9_tip_1  | 1.71819E-13 | 319 | 68   | 113195393 |
| 1 | 55156 length 319 cvg_5.0_tip_1  | 1.07222E-15 | 319 | 3404 | 83317874  |
| 1 | 55158 length 319 cvg_3.5_tip_1  | 1.71183E-13 | 319 | 3404 | 83317874  |
| 1 | 55184 length 319 cvg_7.7_tip_1  | 3.34084E-09 | 319 | 3404 | 83317874  |
| 1 | 55198 length 320 cvg_4.0_tip_1  | 2.55799E-09 | 320 | 3404 | 83317874  |
| 1 | 55210 length 320 cvg_10.0_tip_1 | 2.02212E-14 | 320 | 3404 | 83317874  |
| 1 | 55220 length 320 cvg_4.9_tip_1  | 4.65E-19    | 320 | 3404 | 83317874  |
| 1 | 55234 length 320 cvg_3.0_tip_1  | 7.93E-19    | 320 | 209  | 170573162 |
| 1 | 55242 length 320 cvg_6.0_tip_1  | 5.88348E-14 | 320 | 3404 | 83317874  |
| 1 | 55302 length 321 cvg_6.0_tip_1  | 4.06873E-07 | 321 | 3404 | 83317874  |
| 1 | 55370 length 321 cvg_5.0_tip_1  | 7.65551E-14 | 321 | 3404 | 83317874  |
| 1 | 55536 length 324 cvg_8.0_tip_1  | 4.32E-17    | 324 | 3404 | 83317874  |
| 1 | 55568 length 325 cvg_5.0_tip_1  | 9.99841E-14 | 325 | 3404 | 83317874  |
| 1 | 55628 length 325 cvg_5.0_tip_1  | 9.32333E-12 | 325 | 3404 | 83317874  |
| 1 | 55718 length 326 cvg_8.6_tip_0  | 6.45662E-13 | 326 | 3404 | 83317874  |
| 1 | 55722 length 326 cvg_6.0_tip_0  | 1.87859E-12 | 326 | 3404 | 83317874  |
| 1 | 55742 length 326 cvg_6.5_tip_0  | 1.21E-19    | 326 | 3404 | 83317874  |
| 1 | 55756 length 327 cvg_5.0_tip_1  | 5.11588E-10 | 327 | 3404 | 83317874  |
| 1 | 55780 length 327 cvg_3.0_tip_1  | 3.89E-18    | 327 | 3404 | 83317874  |
| 1 | 55782 length 327 cvg_12.0_tip_1 | 1.17667E-14 | 327 | 3404 | 83317874  |
| 1 | 55824 length 327 cvg_6.0_tip_0  | 6.04321E-11 | 327 | 68   | 113195393 |
| 1 | 55836 length 327 cvg_5.0_tip_1  | 2.89825E-13 | 327 | 3404 | 83317874  |

|   |                                 |             |     |      |           |
|---|---------------------------------|-------------|-----|------|-----------|
| 1 | 55848 length 328 cvg_7.1_tip_1  | 2.45351E-12 | 328 | 3404 | 83317874  |
| 1 | 55860 length 328 cvg_8.0_tip_1  | 5.08E-18    | 328 | 3404 | 83317874  |
| 1 | 55868 length 328 cvg_5.0_tip_1  | 6.25374E-08 | 328 | 3404 | 83317874  |
| 1 | 55874 length 328 cvg_4.3_tip_1  | 2.0071E-14  | 328 | 3404 | 83317874  |
| 1 | 55880 length 328 cvg_9.0_tip_0  | 1.48849E-09 | 328 | 3404 | 83317874  |
| 1 | 55904 length 328 cvg_6.0_tip_1  | 1.94E-17    | 328 | 3404 | 83317874  |
| 1 | 55912 length 328 cvg_5.0_tip_1  | 4.03839E-07 | 328 | 3404 | 83317874  |
| 1 | 55976 length 329 cvg_4.0_tip_1  | 1.17227E-14 | 329 | 786  | 297289774 |
| 1 | 56054 length 330 cvg_7.0_tip_1  | 7.11191E-12 | 330 | 3404 | 83317874  |
| 1 | 56122 length 331 cvg_6.0_tip_1  | 4.74E-16    | 331 | 3404 | 83317874  |
| 1 | 56224 length 333 cvg_14.1_tip_0 | 2.35863E-07 | 333 | 3404 | 83317874  |
| 1 | 56234 length 333 cvg_4.1_tip_0  | 3.27E-17    | 333 | 3404 | 83317874  |
| 1 | 56250 length 333 cvg_5.0_tip_1  | 2.57341E-08 | 333 | 374  | 149022841 |
| 1 | 56298 length 334 cvg_5.0_tip_1  | 2.0537E-11  | 334 | 3404 | 83317874  |
| 1 | 56312 length 334 cvg_5.0_tip_1  | 2.13329E-08 | 334 | 3404 | 83317874  |
| 1 | 56318 length 334 cvg_8.0_tip_1  | 1.20855E-11 | 334 | 68   | 113195393 |
| 1 | 56332 length 334 cvg_5.0_tip_1  | 1.79913E-07 | 334 | 527  | 170040829 |
| 1 | 56378 length 335 cvg_6.0_tip_1  | 8.6284E-10  | 335 | 338  | 7443351   |
| 1 | 56404 length 335 cvg_5.0_tip_1  | 1.92E-17    | 335 | 3404 | 83317874  |
| 1 | 56408 length 335 cvg_4.0_tip_1  | 6.38412E-13 | 335 | 68   | 113195393 |
| 1 | 56456 length 336 cvg_4.9_tip_1  | 4.86965E-13 | 336 | 527  | 170040829 |
| 1 | 56534 length 337 cvg_3.9_tip_1  | 8.90831E-15 | 337 | 821  | 307150584 |
| 1 | 56560 length 338 cvg_7.4_tip_1  | 1.85046E-12 | 338 | 3404 | 83317874  |
| 1 | 56600 length 338 cvg_8.0_tip_1  | 9.83479E-06 | 338 | 190  | 119486002 |
| 1 | 56612 length 339 cvg_3.2_tip_1  | 2.94E-18    | 339 | 284  | 260789714 |
| 1 | 56614 length 339 cvg_10.6_tip_0 | 1.7254E-10  | 339 | 338  | 7443351   |
| 1 | 56628 length 339 cvg_6.4_tip_1  | 9.48762E-08 | 339 | 243  | 261289537 |
| 1 | 56642 length 339 cvg_8.0_tip_0  | 4.69E-16    | 339 | 3404 | 83317874  |
| 1 | 56644 length 339 cvg_7.0_tip_1  | 7.03176E-12 | 339 | 3404 | 83317874  |
| 1 | 56674 length 339 cvg_9.0_tip_1  | 3.26E-17    | 339 | 109  | 281346933 |
| 1 | 56718 length 340 cvg_4.0_tip_1  | 7.50162E-06 | 340 | 3404 | 83317874  |
| 1 | 56744 length 340 cvg_5.0_tip_1  | 9.79742E-06 | 340 | 3404 | 83317874  |
| 1 | 56768 length 341 cvg_7.0_tip_1  | 1.27662E-13 | 341 | 3404 | 83317874  |
| 1 | 56836 length 342 cvg_4.9_tip_1  | 5.34497E-15 | 342 | 3404 | 83317874  |
| 1 | 56878 length 342 cvg_3.0_tip_1  | 2.49E-17    | 342 | 3404 | 83317874  |
| 1 | 56888 length 342 cvg_3.2_tip_1  | 1.36712E-07 | 342 | 68   | 113195393 |
| 1 | 56922 length 343 cvg_7.0_tip_1  | 8.25E-16    | 343 | 3404 | 83317874  |
| 1 | 56960 length 343 cvg_8.0_tip_1  | 1.55E-22    | 343 | 3404 | 83317874  |
| 1 | 57006 length 344 cvg_8.0_tip_1  | 1.04E-18    | 344 | 3404 | 83317874  |
| 1 | 57012 length 344 cvg_4.0_tip_1  | 6.94879E-08 | 344 | 3404 | 83317874  |
| 1 | 57036 length 344 cvg_6.4_tip_1  | 1.1935E-06  | 344 | 68   | 113195393 |
| 1 | 57062 length 345 cvg_7.7_tip_1  | 6.98075E-15 | 345 | 3404 | 83317874  |
| 1 | 57162 length 346 cvg_8.0_tip_1  | 1.27E-16    | 346 | 3404 | 83317874  |
| 1 | 57168 length 346 cvg_6.0_tip_1  | 3.58521E-11 | 346 | 3404 | 83317874  |
| 1 | 57180 length 346 cvg_10.0_tip_0 | 6.97028E-07 | 346 | 847  | 148685014 |
| 1 | 57204 length 347 cvg_10.0_tip_1 | 4.02E-31    | 347 | 179  | 47605602  |
| 1 | 57224 length 347 cvg_4.0_tip_0  | 6.95413E-15 | 347 | 68   | 113195393 |
| 1 | 57226 length 347 cvg_5.0_tip_0  | 3.4513E-14  | 347 | 3404 | 83317874  |

|   |                                 |             |     |      |           |
|---|---------------------------------|-------------|-----|------|-----------|
| 1 | 57304 length 348 cvg_4.0_tip_1  | 1.50054E-09 | 348 | 3404 | 83317874  |
| 1 | 57354 length 349 cvg_6.4_tip_0  | 2.30614E-10 | 349 | 3404 | 83317874  |
| 1 | 57358 length 349 cvg_6.0_tip_1  | 1.83428E-07 | 349 | 175  | 312121062 |
| 1 | 57360 length 349 cvg_5.1_tip_0  | 4.05E-23    | 349 | 527  | 170040829 |
| 1 | 57380 length 349 cvg_7.0_tip_1  | 7.52856E-08 | 349 | 209  | 170573162 |
| 1 | 57382 length 349 cvg_5.0_tip_1  | 1.35199E-10 | 349 | 3404 | 83317874  |
| 1 | 57436 length 350 cvg_6.0_tip_1  | 1.06876E-15 | 350 | 3404 | 83317874  |
| 1 | 57442 length 350 cvg_6.0_tip_1  | 7.16884E-12 | 350 | 68   | 113195393 |
| 1 | 57478 length 351 cvg_3.0_tip_1  | 7.67704E-06 | 351 | 68   | 113195393 |
| 1 | 57480 length 351 cvg_22.0_tip_0 | 3.68181E-08 | 351 | 3404 | 83317874  |
| 1 | 57512 length 351 cvg_10.6_tip_1 | 1.21812E-11 | 351 | 3404 | 83317874  |
| 1 | 57522 length 351 cvg_8.9_tip_1  | 7.15E-20    | 351 | 3404 | 83317874  |
| 1 | 57530 length 351 cvg_8.2_tip_1  | 2.81906E-08 | 351 | 3404 | 83317874  |
| 1 | 57548 length 352 cvg_5.0_tip_1  | 1.34679E-10 | 352 | 188  | 115925514 |
| 1 | 57558 length 352 cvg_8.1_tip_1  | 4.32E-17    | 352 | 700  | 270013850 |
| 1 | 57564 length 352 cvg_8.0_tip_1  | 3.78664E-13 | 352 | 149  | 68010379  |
| 1 | 57568 length 352 cvg_6.0_tip_1  | 1.69975E-13 | 352 | 3404 | 83317874  |
| 1 | 57576 length 352 cvg_6.0_tip_1  | 3.54419E-11 | 352 | 3404 | 83317874  |
| 1 | 57602 length 352 cvg_4.0_tip_1  | 3.78664E-13 | 352 | 68   | 113195393 |
| 1 | 57676 length 353 cvg_5.0_tip_1  | 8.71E-18    | 353 | 3404 | 83317874  |
| 1 | 57760 length 355 cvg_5.7_tip_1  | 4.03007E-15 | 355 | 3404 | 83317874  |
| 1 | 57856 length 356 cvg_6.1_tip_1  | 1.53498E-06 | 356 | 3404 | 83317874  |
| 1 | 57898 length 357 cvg_4.0_tip_1  | 1.87204E-12 | 357 | 3404 | 83317874  |
| 1 | 58020 length 358 cvg_4.0_tip_1  | 9.91092E-06 | 358 | 3858 | 296005482 |
| 1 | 58068 length 359 cvg_6.0_tip_1  | 2.51E-17    | 359 | 3404 | 83317874  |
| 1 | 58078 length 359 cvg_8.0_tip_1  | 1.02324E-10 | 359 | 209  | 170573162 |
| 1 | 58090 length 360 cvg_6.0_tip_1  | 9.56E-17    | 360 | 3404 | 83317874  |
| 1 | 58144 length 361 cvg_7.0_tip_1  | 1.54E-18    | 361 | 209  | 170573162 |
| 1 | 58162 length 361 cvg_7.2_tip_0  | 1.47181E-09 | 361 | 68   | 113195393 |
| 1 | 58204 length 361 cvg_5.0_tip_1  | 2.59198E-14 | 361 | 3404 | 83317874  |
| 1 | 58218 length 362 cvg_6.0_tip_1  | 2.96561E-10 | 362 | 3404 | 83317874  |
| 1 | 58268 length 362 cvg_4.0_tip_1  | 1.08899E-12 | 362 | 3404 | 83317874  |
| 1 | 58282 length 363 cvg_10.7_tip_0 | 2.50E-17    | 363 | 3404 | 83317874  |
| 1 | 58302 length 363 cvg_6.0_tip_0  | 1.52E-22    | 363 | 3404 | 83317874  |
| 1 | 58320 length 363 cvg_4.9_tip_1  | 5.22266E-15 | 363 | 3404 | 83317874  |
| 1 | 58370 length 364 cvg_6.0_tip_0  | 4.12201E-12 | 364 | 338  | 7443351   |
| 1 | 58398 length 365 cvg_5.0_tip_1  | 2.51015E-11 | 365 | 68   | 113195393 |
| 1 | 58454 length 366 cvg_8.0_tip_1  | 1.46032E-09 | 366 | 3404 | 83317874  |
| 1 | 58498 length 366 cvg_7.8_tip_1  | 3.47582E-11 | 366 | 3404 | 83317874  |
| 1 | 58506 length 367 cvg_7.4_tip_1  | 1.2411E-08  | 367 | 3404 | 83317874  |
| 1 | 58510 length 367 cvg_5.8_tip_1  | 2.58786E-06 | 367 | 123  | 149032404 |
| 1 | 58688 length 370 cvg_7.7_tip_1  | 4.23028E-12 | 370 | 3404 | 83317874  |
| 1 | 58692 length 370 cvg_5.0_tip_1  | 2.8434E-13  | 370 | 3404 | 83317874  |
| 1 | 58696 length 370 cvg_4.0_tip_1  | 4.10586E-12 | 370 | 3404 | 83317874  |
| 1 | 58764 length 371 cvg_8.0_tip_1  | 5.89E-22    | 371 | 821  | 307150584 |
| 1 | 58774 length 371 cvg_7.0_tip_1  | 1.96504E-09 | 371 | 3404 | 83317874  |
| 1 | 58778 length 371 cvg_5.0_tip_1  | 9.42407E-12 | 371 | 68   | 113195393 |
| 1 | 58802 length 372 cvg_5.2_tip_1  | 7.43776E-09 | 372 | 3404 | 83317874  |

|   |                                 |             |     |      |           |
|---|---------------------------------|-------------|-----|------|-----------|
| 1 | 58850 length 373 cvg_5.0_tip_0  | 1.55699E-06 | 373 | 68   | 113195393 |
| 1 | 58864 length 373 cvg_4.6_tip_1  | 1.27E-16    | 373 | 3404 | 83317874  |
| 1 | 58940 length 374 cvg_5.0_tip_1  | 7.67905E-14 | 374 | 3404 | 83317874  |
| 1 | 58946 length 374 cvg_9.0_tip_1  | 4.65872E-11 | 374 | 3404 | 83317874  |
| 1 | 59050 length 376 cvg_4.0_tip_1  | 3.32548E-09 | 376 | 3404 | 83317874  |
| 1 | 59084 length 377 cvg_6.0_tip_1  | 9.05614E-07 | 377 | 3404 | 83317874  |
| 1 | 59114 length 377 cvg_8.0_tip_1  | 2.15E-24    | 377 | 209  | 170573162 |
| 1 | 59130 length 377 cvg_7.7_tip_1  | 8.45665E-13 | 377 | 3404 | 83317874  |
| 1 | 59138 length 377 cvg_8.0_tip_0  | 1.82475E-07 | 377 | 589  | 325074608 |
| 1 | 59166 length 378 cvg_5.0_tip_1  | 8.99933E-15 | 378 | 3404 | 83317874  |
| 1 | 59204 length 379 cvg_3.3_tip_1  | 3.24537E-06 | 379 | 68   | 113195393 |
| 1 | 59222 length 379 cvg_10.0_tip_0 | 1.01E-16    | 379 | 962  | 82793635  |
| 1 | 59224 length 379 cvg_4.0_tip_1  | 6.7006E-10  | 379 | 68   | 113195393 |
| 1 | 59268 length 379 cvg_5.0_tip_1  | 2.99E-18    | 379 | 3404 | 83317874  |
| 1 | 59270 length 379 cvg_7.0_tip_1  | 4.64032E-11 | 379 | 3404 | 83317874  |
| 1 | 59278 length 380 cvg_10.4_tip_1 | 3.41974E-14 | 380 | 3404 | 83317874  |
| 1 | 59288 length 380 cvg_9.0_tip_1  | 5.51007E-08 | 380 | 821  | 307150584 |
| 1 | 59290 length 380 cvg_4.2_tip_1  | 6.43E-21    | 380 | 3404 | 83317874  |
| 1 | 59300 length 380 cvg_13.0_tip_1 | 1.53862E-06 | 380 | 224  | 156835964 |
| 1 | 59354 length 381 cvg_7.0_tip_1  | 1.10009E-12 | 381 | 574  | 301627950 |
| 1 | 59372 length 381 cvg_7.0_tip_1  | 1.13842E-09 | 381 | 3404 | 83317874  |
| 1 | 59424 length 382 cvg_9.0_tip_1  | 7.8838E-11  | 382 | 3404 | 83317874  |
| 1 | 59456 length 383 cvg_9.0_tip_0  | 1.93412E-09 | 383 | 68   | 113195393 |
| 1 | 59524 length 384 cvg_8.0_tip_1  | 1.01E-34    | 384 | 242  | 310128585 |
| 1 | 59530 length 384 cvg_10.7_tip_0 | 2.19E-21    | 384 | 3404 | 83317874  |
| 1 | 59612 length 385 cvg_3.0_tip_1  | 2.60359E-06 | 385 | 175  | 312121062 |
| 1 | 59630 length 386 cvg_4.0_tip_1  | 3.40039E-06 | 386 | 589  | 325074608 |
| 1 | 59642 length 386 cvg_7.0_tip_1  | 5.98835E-11 | 386 | 3404 | 83317874  |
| 1 | 59666 length 386 cvg_4.0_tip_0  | 2.78E-16    | 386 | 3404 | 83317874  |
| 1 | 59676 length 386 cvg_15.3_tip_1 | 1.09133E-12 | 386 | 3404 | 83317874  |
| 1 | 59686 length 386 cvg_5.0_tip_1  | 9.54E-17    | 386 | 3404 | 83317874  |
| 1 | 59702 length 386 cvg_7.0_tip_1  | 1.57E-19    | 386 | 3404 | 83317874  |
| 1 | 59744 length 387 cvg_3.0_tip_1  | 8.9125E-07  | 387 | 3404 | 83317874  |
| 1 | 59766 length 388 cvg_9.0_tip_0  | 6.398E-13   | 388 | 68   | 113195393 |
| 1 | 59886 length 390 cvg_5.0_tip_1  | 3.48252E-11 | 390 | 3980 | 296004518 |
| 1 | 59888 length 390 cvg_4.0_tip_1  | 2.86041E-13 | 390 | 68   | 113195393 |
| 1 | 59892 length 390 cvg_5.0_tip_1  | 1.47E-17    | 390 | 3404 | 83317874  |
| 1 | 59928 length 390 cvg_8.0_tip_1  | 5.77691E-06 | 390 | 1272 | 148645276 |
| 1 | 59980 length 391 cvg_7.0_tip_1  | 1.51061E-14 | 391 | 3404 | 83317874  |
| 1 | 60014 length 392 cvg_8.0_tip_1  | 7.00E-20    | 392 | 3404 | 83317874  |
| 1 | 60040 length 392 cvg_6.0_tip_0  | 2.04165E-11 | 392 | 68   | 113195393 |
| 1 | 60058 length 392 cvg_9.0_tip_1  | 5.74031E-14 | 392 | 3404 | 83317874  |
| 1 | 60068 length 392 cvg_8.1_tip_1  | 9.14E-20    | 392 | 3404 | 83317874  |
| 1 | 60120 length 393 cvg_6.0_tip_1  | 4.52447E-14 | 393 | 3404 | 83317874  |
| 1 | 60152 length 394 cvg_6.0_tip_1  | 1.18216E-14 | 394 | 209  | 170573162 |
| 1 | 60158 length 394 cvg_6.8_tip_1  | 8.53278E-13 | 394 | 3404 | 83317874  |
| 1 | 60168 length 394 cvg_9.0_tip_0  | 9.77E-22    | 394 | 3404 | 83317874  |
| 1 | 60172 length 394 cvg_4.7_tip_1  | 9.79148E-14 | 394 | 3404 | 83317874  |

|   |                                 |             |     |      |           |
|---|---------------------------------|-------------|-----|------|-----------|
| 1 | 60228 length 395 cvg_5.8_tip_1  | 3.95E-18    | 395 | 3404 | 83317874  |
| 1 | 60304 length 396 cvg_5.8_tip_1  | 6.115E-11   | 396 | 589  | 325074608 |
| 1 | 60312 length 396 cvg_9.0_tip_1  | 4.65E-19    | 396 | 3404 | 83317874  |
| 1 | 60366 length 397 cvg_4.0_tip_1  | 7.18E-20    | 397 | 3404 | 83317874  |
| 1 | 60468 length 399 cvg_7.4_tip_1  | 1.65E-16    | 399 | 3404 | 83317874  |
| 1 | 60480 length 399 cvg_6.0_tip_1  | 1.26474E-08 | 399 | 3404 | 83317874  |
| 1 | 60534 length 400 cvg_4.0_tip_1  | 1.95917E-09 | 400 | 68   | 113195393 |
| 1 | 60546 length 401 cvg_4.0_tip_1  | 7.65513E-14 | 401 | 3404 | 83317874  |
| 1 | 60548 length 401 cvg_6.5_tip_1  | 2.08469E-11 | 401 | 3404 | 83317874  |
| 1 | 60604 length 402 cvg_7.0_tip_1  | 2.63714E-06 | 402 | 1153 | 322504193 |
| 1 | 60668 length 403 cvg_5.0_tip_1  | 3.43017E-06 | 403 | 3404 | 83317874  |
| 1 | 60688 length 403 cvg_7.0_tip_1  | 1.7576E-10  | 403 | 3404 | 83317874  |
| 1 | 60696 length 404 cvg_8.0_tip_1  | 4.7864E-08  | 404 | 3404 | 83317874  |
| 1 | 60710 length 404 cvg_8.0_tip_1  | 1.81462E-15 | 404 | 3404 | 83317874  |
| 1 | 60716 length 404 cvg_4.0_tip_1  | 7.64161E-06 | 404 | 3404 | 83317874  |
| 1 | 60724 length 404 cvg_9.6_tip_0  | 1.34575E-10 | 404 | 229  | 322507045 |
| 1 | 60758 length 405 cvg_10.0_tip_1 | 7.61032E-06 | 405 | 1207 | 74007516  |
| 1 | 60764 length 405 cvg_8.0_tip_0  | 9.91636E-14 | 405 | 3404 | 83317874  |
| 1 | 60774 length 405 cvg_8.0_tip_1  | 1.17893E-06 | 405 | 244  | 156355349 |
| 1 | 60810 length 406 cvg_7.0_tip_0  | 6.64E-18    | 406 | 3404 | 83317874  |
| 1 | 60834 length 406 cvg_9.0_tip_1  | 2.69E-19    | 406 | 3404 | 83317874  |
| 1 | 60856 length 407 cvg_9.0_tip_0  | 6.22564E-08 | 407 | 3404 | 83317874  |
| 1 | 60866 length 407 cvg_9.0_tip_0  | 2.79E-16    | 407 | 3404 | 83317874  |
| 1 | 60892 length 407 cvg_6.2_tip_1  | 2.70048E-11 | 407 | 3404 | 83317874  |
| 1 | 60898 length 407 cvg_9.0_tip_0  | 4.46159E-06 | 407 | 338  | 7443351   |
| 1 | 60924 length 408 cvg_4.2_tip_1  | 2.2861E-10  | 408 | 3404 | 83317874  |
| 1 | 61008 length 409 cvg_9.0_tip_1  | 3.29E-17    | 409 | 3404 | 83317874  |
| 1 | 61038 length 410 cvg_4.0_tip_1  | 8.65144E-10 | 410 | 68   | 113195393 |
| 1 | 61062 length 410 cvg_5.0_tip_1  | 1.16657E-14 | 410 | 3404 | 83317874  |
| 1 | 61090 length 411 cvg_3.0_tip_1  | 4.41465E-14 | 411 | 3404 | 83317874  |
| 1 | 61150 length 412 cvg_4.0_tip_0  | 1.57015E-11 | 412 | 3404 | 83317874  |
| 1 | 61186 length 412 cvg_7.0_tip_0  | 2.59412E-06 | 412 | 3404 | 83317874  |
| 1 | 61198 length 412 cvg_8.9_tip_1  | 2.19E-21    | 412 | 119  | 170579958 |
| 1 | 61242 length 413 cvg_6.0_tip_1  | 4.56E-19    | 413 | 3404 | 83317874  |
| 1 | 61260 length 414 cvg_11.4_tip_0 | 7.0481E-12  | 414 | 3404 | 83317874  |
| 1 | 61264 length 414 cvg_4.9_tip_1  | 6.37474E-13 | 414 | 3404 | 83317874  |
| 1 | 61272 length 414 cvg_17.0_tip_0 | 1.3237E-10  | 414 | 3404 | 83317874  |
| 1 | 61296 length 415 cvg_4.0_tip_1  | 2.84963E-13 | 415 | 68   | 113195393 |
| 1 | 61298 length 415 cvg_3.0_tip_1  | 5.58454E-09 | 415 | 3404 | 83317874  |
| 1 | 61300 length 415 cvg_4.8_tip_1  | 1.46352E-09 | 415 | 3404 | 83317874  |
| 1 | 61304 length 415 cvg_4.7_tip_0  | 1.0464E-15  | 415 | 3404 | 83317874  |
| 1 | 61360 length 416 cvg_6.0_tip_0  | 1.72881E-10 | 416 | 68   | 113195393 |
| 1 | 61408 length 417 cvg_7.0_tip_1  | 2.04E-19    | 417 | 3404 | 83317874  |
| 1 | 61432 length 417 cvg_5.0_tip_1  | 9.15E-20    | 417 | 3404 | 83317874  |
| 1 | 61442 length 417 cvg_5.0_tip_0  | 5.03007E-10 | 417 | 338  | 7443351   |
| 1 | 61454 length 418 cvg_6.0_tip_0  | 8.50E-26    | 418 | 3404 | 83317874  |
| 1 | 61476 length 418 cvg_11.0_tip_0 | 7.23316E-09 | 418 | 3404 | 83317874  |
| 1 | 61488 length 418 cvg_5.0_tip_1  | 1.11592E-09 | 418 | 3404 | 83317874  |

|   |                                 |             |     |      |           |
|---|---------------------------------|-------------|-----|------|-----------|
| 1 | 61514 length 419 cvg_5.0_tip_1  | 1.32E-18    | 419 | 3404 | 83317874  |
| 1 | 61578 length 420 cvg_8.3_tip_0  | 1.01E-18    | 420 | 3404 | 83317874  |
| 1 | 61582 length 421 cvg_6.7_tip_0  | 3.81213E-13 | 421 | 68   | 113195393 |
| 1 | 61592 length 421 cvg_4.0_tip_0  | 3.35215E-14 | 421 | 68   | 113195393 |
| 1 | 61624 length 421 cvg_4.0_tip_1  | 5.5047E-12  | 421 | 609  | 73964634  |
| 1 | 61666 length 422 cvg_8.0_tip_1  | 4.06E-23    | 422 | 382  | 118083218 |
| 1 | 61736 length 424 cvg_6.0_tip_1  | 5.15224E-10 | 424 | 3404 | 83317874  |
| 1 | 61762 length 424 cvg_6.0_tip_1  | 1.88403E-12 | 424 | 3404 | 83317874  |
| 1 | 61844 length 426 cvg_6.0_tip_1  | 1.30E-21    | 426 | 3404 | 83317874  |
| 1 | 61850 length 426 cvg_7.8_tip_1  | 2.52E-25    | 426 | 3404 | 83317874  |
| 1 | 61856 length 426 cvg_6.2_tip_0  | 3.78025E-13 | 426 | 3404 | 83317874  |
| 1 | 61948 length 428 cvg_6.7_tip_1  | 6.44813E-13 | 428 | 3404 | 83317874  |
| 1 | 61996 length 429 cvg_6.7_tip_1  | 8.10E-16    | 429 | 589  | 325074608 |
| 1 | 62024 length 430 cvg_5.3_tip_1  | 2.13E-16    | 430 | 3404 | 83317874  |
| 1 | 62050 length 430 cvg_5.1_tip_1  | 7.09919E-12 | 430 | 3404 | 83317874  |
| 1 | 62054 length 430 cvg_6.9_tip_1  | 4.59E-19    | 430 | 3404 | 83317874  |
| 1 | 62056 length 430 cvg_7.0_tip_1  | 5.8075E-14  | 430 | 3404 | 83317874  |
| 1 | 62080 length 431 cvg_8.7_tip_1  | 8.67817E-10 | 431 | 3404 | 83317874  |
| 1 | 62082 length 431 cvg_8.4_tip_0  | 8.37E-21    | 431 | 3404 | 83317874  |
| 1 | 62102 length 432 cvg_11.0_tip_1 | 5.81E-17    | 432 | 1887 | 302838799 |
| 1 | 62116 length 432 cvg_7.0_tip_1  | 1.17289E-06 | 432 | 1346 | 74007229  |
| 1 | 62156 length 433 cvg_6.0_tip_1  | 6.39376E-13 | 433 | 3404 | 83317874  |
| 1 | 62274 length 436 cvg_5.1_tip_1  | 4.0048E-15  | 436 | 3404 | 83317874  |
| 1 | 62296 length 436 cvg_10.0_tip_0 | 8.58E-18    | 436 | 3404 | 83317874  |
| 1 | 62300 length 436 cvg_9.0_tip_1  | 3.1597E-12  | 436 | 243  | 261289537 |
| 1 | 62326 length 437 cvg_4.6_tip_1  | 1.16026E-14 | 437 | 3404 | 83317874  |
| 1 | 62348 length 437 cvg_8.0_tip_1  | 2.4193E-12  | 437 | 3404 | 83317874  |
| 1 | 62468 length 440 cvg_6.0_tip_1  | 2.32787E-15 | 440 | 3404 | 83317874  |
| 1 | 62556 length 442 cvg_12.0_tip_0 | 1.15799E-06 | 442 | 68   | 113195393 |
| 1 | 62578 length 442 cvg_7.0_tip_1  | 1.36472E-15 | 442 | 1385 | 66819811  |
| 1 | 62596 length 443 cvg_5.0_tip_1  | 4.98873E-13 | 443 | 3404 | 83317874  |
| 1 | 62598 length 443 cvg_8.9_tip_1  | 1.07E-23    | 443 | 2054 | 281340843 |
| 1 | 62662 length 444 cvg_7.0_tip_1  | 7.71438E-06 | 444 | 229  | 322507045 |
| 1 | 62672 length 444 cvg_3.0_tip_1  | 1.50E-17    | 444 | 3404 | 83317874  |
| 1 | 62682 length 444 cvg_4.0_tip_1  | 3.11134E-15 | 444 | 589  | 325074608 |
| 1 | 62712 length 445 cvg_7.0_tip_1  | 1.44527E-12 | 445 | 3404 | 83317874  |
| 1 | 62778 length 447 cvg_9.5_tip_1  | 3.11857E-07 | 447 | 413  | 194238119 |
| 1 | 62836 length 448 cvg_9.1_tip_1  | 4.48405E-07 | 448 | 527  | 170040829 |
| 1 | 62862 length 449 cvg_4.4_tip_0  | 1.70E-21    | 449 | 3404 | 83317874  |
| 1 | 62888 length 449 cvg_5.7_tip_1  | 5.84247E-14 | 449 | 3404 | 83317874  |
| 1 | 62924 length 451 cvg_8.0_tip_1  | 1.59E-19    | 451 | 3404 | 83317874  |
| 1 | 63050 length 453 cvg_7.0_tip_1  | 4.03789E-07 | 453 | 3858 | 296005482 |
| 1 | 63096 length 454 cvg_6.0_tip_1  | 3.64E-24    | 454 | 3404 | 83317874  |
| 1 | 63134 length 456 cvg_6.0_tip_1  | 1.02E-18    | 456 | 3404 | 83317874  |
| 1 | 63152 length 456 cvg_6.1_tip_1  | 7.04925E-12 | 456 | 3404 | 83317874  |
| 1 | 63164 length 456 cvg_10.0_tip_1 | 1.09E-20    | 456 | 178  | 296234236 |
| 1 | 63206 length 458 cvg_7.0_tip_1  | 1.79E-23    | 458 | 3404 | 83317874  |
| 1 | 63268 length 460 cvg_8.0_tip_1  | 3.04434E-15 | 460 | 3404 | 83317874  |

|   |                                 |             |     |      |           |
|---|---------------------------------|-------------|-----|------|-----------|
| 1 | 63312 length 461 cvg_6.0_tip_1  | 4.39E-22    | 461 | 3404 | 83317874  |
| 1 | 63324 length 461 cvg_8.0_tip_0  | 6.55E-18    | 461 | 3404 | 83317874  |
| 1 | 63406 length 463 cvg_5.9_tip_1  | 2.92643E-13 | 463 | 3404 | 83317874  |
| 1 | 63432 length 464 cvg_7.0_tip_1  | 4.99173E-13 | 464 | 3404 | 83317874  |
| 1 | 63444 length 464 cvg_6.0_tip_1  | 5.51E-20    | 464 | 3404 | 83317874  |
| 1 | 63458 length 465 cvg_5.3_tip_1  | 2.46647E-12 | 465 | 3404 | 83317874  |
| 1 | 63554 length 467 cvg_6.0_tip_1  | 3.80E-21    | 467 | 3404 | 83317874  |
| 1 | 63626 length 469 cvg_8.1_tip_1  | 1.88016E-12 | 469 | 175  | 312121062 |
| 1 | 63638 length 470 cvg_11.0_tip_0 | 3.54582E-11 | 470 | 3404 | 83317874  |
| 1 | 63654 length 470 cvg_8.0_tip_1  | 1.53807E-14 | 470 | 3404 | 83317874  |
| 1 | 63672 length 471 cvg_4.0_tip_1  | 1.29627E-13 | 471 | 3404 | 83317874  |
| 1 | 63674 length 471 cvg_8.0_tip_1  | 1.69E-29    | 471 | 3404 | 83317874  |
| 1 | 63700 length 471 cvg_5.0_tip_1  | 2.14E-16    | 471 | 3404 | 83317874  |
| 1 | 63748 length 472 cvg_8.0_tip_1  | 2.21E-21    | 472 | 3404 | 83317874  |
| 1 | 63808 length 474 cvg_5.0_tip_1  | 3.19282E-12 | 474 | 3404 | 83317874  |
| 1 | 63900 length 477 cvg_6.0_tip_1  | 1.57E-19    | 477 | 3404 | 83317874  |
| 1 | 63908 length 477 cvg_5.0_tip_1  | 7.04941E-12 | 477 | 68   | 113195393 |
| 1 | 63918 length 477 cvg_7.0_tip_1  | 2.67877E-11 | 477 | 3404 | 83317874  |
| 1 | 63942 length 478 cvg_5.9_tip_1  | 4.27673E-09 | 478 | 3404 | 83317874  |
| 1 | 63960 length 479 cvg_9.8_tip_1  | 2.49E-33    | 479 | 237  | 156403857 |
| 1 | 63982 length 479 cvg_5.0_tip_1  | 6.36E-21    | 479 | 3404 | 83317874  |
| 1 | 64008 length 480 cvg_7.0_tip_1  | 2.12252E-08 | 480 | 175  | 312121062 |
| 1 | 64038 length 481 cvg_14.0_tip_1 | 9.20682E-12 | 481 | 123  | 149032404 |
| 1 | 64100 length 482 cvg_5.0_tip_1  | 3.47E-19    | 482 | 3404 | 83317874  |
| 1 | 64194 length 485 cvg_5.3_tip_1  | 1.60452E-11 | 485 | 3404 | 83317874  |
| 1 | 64298 length 488 cvg_13.0_tip_1 | 4.51E-17    | 488 | 2205 | 66800837  |
| 1 | 64314 length 489 cvg_9.0_tip_1  | 2.30645E-10 | 489 | 353  | 168020974 |
| 1 | 64324 length 489 cvg_8.0_tip_1  | 6.28105E-08 | 489 | 191  | 281338568 |
| 1 | 64334 length 489 cvg_8.0_tip_1  | 3.66E-16    | 489 | 3404 | 83317874  |
| 1 | 64376 length 490 cvg_4.8_tip_1  | 1.81921E-07 | 490 | 967  | 124806630 |
| 1 | 64400 length 491 cvg_4.0_tip_1  | 3.78449E-13 | 491 | 3404 | 83317874  |
| 1 | 64410 length 491 cvg_10.0_tip_1 | 2.3955E-09  | 491 | 1272 | 66734174  |
| 1 | 64428 length 492 cvg_5.8_tip_1  | 1.38335E-15 | 492 | 3404 | 83317874  |
| 1 | 64510 length 495 cvg_4.0_tip_1  | 4.02493E-15 | 495 | 3404 | 83317874  |
| 1 | 64542 length 496 cvg_6.5_tip_1  | 1.02591E-10 | 496 | 3404 | 83317874  |
| 1 | 64600 length 497 cvg_6.0_tip_1  | 6.83403E-15 | 497 | 3404 | 83317874  |
| 1 | 64630 length 498 cvg_6.0_tip_1  | 5.23263E-15 | 498 | 3404 | 83317874  |
| 1 | 64640 length 498 cvg_7.0_tip_1  | 1.9884E-14  | 498 | 3404 | 83317874  |
| 1 | 64644 length 499 cvg_7.2_tip_1  | 5.20854E-15 | 499 | 3404 | 83317874  |
| 1 | 64754 length 503 cvg_9.0_tip_1  | 7.73E-19    | 503 | 821  | 307150584 |
| 1 | 64766 length 503 cvg_8.7_tip_1  | 5.8587E-06  | 503 | 510  | 293359146 |
| 1 | 64800 length 504 cvg_6.3_tip_1  | 1.65E-16    | 504 | 3404 | 83317874  |
| 1 | 64850 length 505 cvg_7.8_tip_1  | 9.43E-25    | 505 | 3404 | 83317874  |
| 1 | 64874 length 506 cvg_7.0_tip_1  | 5.87E-22    | 506 | 3404 | 83317874  |
| 1 | 64882 length 506 cvg_10.1_tip_0 | 4.07138E-15 | 506 | 3404 | 83317874  |
| 1 | 64920 length 507 cvg_5.9_tip_1  | 1.06E-26    | 507 | 3404 | 83317874  |
| 1 | 64924 length 507 cvg_4.0_tip_1  | 1.15026E-07 | 507 | 3980 | 296004518 |
| 1 | 64936 length 508 cvg_7.0_tip_1  | 4.65826E-11 | 508 | 234  | 110756233 |



|   |                                 |             |     |      |           |
|---|---------------------------------|-------------|-----|------|-----------|
| 1 | 64964 length 508 cvg_8.9_tip_1  | 3.53279E-14 | 508 | 3404 | 83317874  |
| 1 | 64990 length 509 cvg_6.0_tip_1  | 1.93E-20    | 509 | 3404 | 83317874  |
| 1 | 65006 length 509 cvg_4.4_tip_1  | 1.53E-17    | 509 | 3404 | 83317874  |
| 1 | 65058 length 511 cvg_5.0_tip_1  | 1.79E-21    | 511 | 3404 | 83317874  |
| 1 | 65098 length 512 cvg_6.8_tip_1  | 4.72E-22    | 512 | 3404 | 83317874  |
| 1 | 65118 length 513 cvg_4.4_tip_1  | 3.99E-21    | 513 | 3404 | 83317874  |
| 1 | 65122 length 513 cvg_7.0_tip_1  | 3.49E-25    | 513 | 3404 | 83317874  |
| 1 | 65142 length 514 cvg_6.0_tip_0  | 5.00762E-11 | 514 | 68   | 113195393 |
| 1 | 65186 length 515 cvg_5.8_tip_1  | 2.65527E-12 | 515 | 68   | 113195393 |
| 1 | 65194 length 516 cvg_7.8_tip_1  | 4.37673E-15 | 516 | 243  | 261289537 |
| 1 | 65238 length 517 cvg_5.0_tip_1  | 4.21E-18    | 517 | 3404 | 83317874  |
| 1 | 65280 length 519 cvg_4.8_tip_1  | 5.42E-29    | 519 | 3404 | 83317874  |
| 1 | 65340 length 521 cvg_6.6_tip_1  | 1.17308E-15 | 521 | 3404 | 83317874  |
| 1 | 65352 length 521 cvg_7.5_tip_1  | 2.79861E-09 | 521 | 3404 | 83317874  |
| 1 | 65516 length 526 cvg_6.0_tip_1  | 3.80E-25    | 526 | 3404 | 83317874  |
| 1 | 65522 length 526 cvg_7.0_tip_1  | 2.31827E-06 | 526 | 3404 | 83317874  |
| 1 | 65538 length 527 cvg_5.0_tip_1  | 6.70E-30    | 527 | 3404 | 83317874  |
| 1 | 65646 length 530 cvg_4.3_tip_1  | 8.12212E-15 | 530 | 3404 | 83317874  |
| 1 | 65678 length 531 cvg_9.9_tip_0  | 3.15207E-14 | 531 | 3404 | 83317874  |
| 1 | 65688 length 532 cvg_5.9_tip_1  | 7.11533E-11 | 532 | 3404 | 83317874  |
| 1 | 65712 length 532 cvg_6.7_tip_1  | 3.18E-27    | 532 | 3404 | 83317874  |
| 1 | 65778 length 534 cvg_5.9_tip_1  | 7.50E-16    | 534 | 3404 | 83317874  |
| 1 | 65812 length 535 cvg_8.0_tip_1  | 2.33E-17    | 535 | 209  | 170573162 |
| 1 | 65818 length 536 cvg_12.9_tip_0 | 1.00259E-07 | 536 | 3404 | 83317874  |
| 1 | 65830 length 536 cvg_5.0_tip_1  | 2.81E-18    | 536 | 3404 | 83317874  |
| 1 | 65834 length 536 cvg_5.0_tip_1  | 6.47E-23    | 536 | 3404 | 83317874  |
| 1 | 65864 length 537 cvg_6.2_tip_1  | 8.11E-34    | 537 | 3404 | 83317874  |
| 1 | 65900 length 538 cvg_4.3_tip_1  | 6.66E-20    | 538 | 3404 | 83317874  |
| 1 | 65916 length 539 cvg_7.7_tip_0  | 9.62E-19    | 539 | 3404 | 83317874  |
| 1 | 65926 length 539 cvg_10.0_tip_0 | 5.85028E-08 | 539 | 68   | 113195393 |
| 1 | 65940 length 540 cvg_6.2_tip_1  | 2.89E-23    | 540 | 3404 | 83317874  |
| 1 | 65958 length 541 cvg_6.1_tip_1  | 1.48E-19    | 541 | 3404 | 83317874  |
| 1 | 66030 length 543 cvg_5.6_tip_1  | 1.46E-22    | 543 | 3404 | 83317874  |
| 1 | 66032 length 543 cvg_7.0_tip_1  | 3.11E-20    | 543 | 3404 | 83317874  |
| 1 | 66048 length 544 cvg_3.3_tip_1  | 1.1856E-11  | 544 | 589  | 325074608 |
| 1 | 66096 length 545 cvg_9.0_tip_1  | 4.36372E-06 | 545 | 1153 | 322504193 |
| 1 | 66118 length 546 cvg_8.0_tip_1  | 2.38E-28    | 546 | 3404 | 83317874  |
| 1 | 66140 length 546 cvg_7.1_tip_1  | 6.05E-32    | 546 | 3404 | 83317874  |
| 1 | 66144 length 547 cvg_8.6_tip_1  | 4.31E-46    | 547 | 209  | 170573162 |
| 1 | 66170 length 548 cvg_7.7_tip_1  | 7.30E-25    | 548 | 3404 | 83317874  |
| 1 | 66184 length 548 cvg_5.0_tip_1  | 8.94423E-15 | 548 | 3404 | 83317874  |
| 1 | 66242 length 550 cvg_6.4_tip_1  | 6.20846E-08 | 550 | 1612 | 159899059 |
| 1 | 66324 length 554 cvg_6.0_tip_1  | 7.84E-22    | 554 | 3404 | 83317874  |
| 1 | 66450 length 558 cvg_7.1_tip_1  | 1.67E-19    | 558 | 589  | 325074608 |
| 1 | 66462 length 559 cvg_4.9_tip_1  | 9.63224E-15 | 559 | 3404 | 83317874  |
| 1 | 66482 length 560 cvg_9.6_tip_1  | 4.33376E-07 | 560 | 149  | 68010379  |
| 1 | 66486 length 560 cvg_5.2_tip_1  | 1.70E-19    | 560 | 3404 | 83317874  |
| 1 | 66496 length 560 cvg_8.0_tip_1  | 2.29796E-08 | 560 | 271  | 296210798 |

|   |                                 |             |     |      |           |
|---|---------------------------------|-------------|-----|------|-----------|
| 1 | 66546 length 563 cvg_5.0_tip_1  | 8.31906E-06 | 563 | 239  | 297688963 |
| 1 | 66582 length 564 cvg_6.0_tip_1  | 1.66E-30    | 564 | 3404 | 83317874  |
| 1 | 66610 length 565 cvg_5.0_tip_1  | 6.54547E-11 | 565 | 3404 | 83317874  |
| 1 | 66640 length 566 cvg_8.8_tip_0  | 3.53449E-08 | 566 | 821  | 307150584 |
| 1 | 66652 length 566 cvg_5.0_tip_1  | 8.0013E-09  | 566 | 68   | 113195393 |
| 1 | 66668 length 568 cvg_5.0_tip_1  | 8.14167E-09 | 568 | 3404 | 83317874  |
| 1 | 66670 length 568 cvg_5.0_tip_1  | 5.25E-24    | 568 | 3404 | 83317874  |
| 1 | 66706 length 569 cvg_10.0_tip_1 | 5.27728E-08 | 569 | 3404 | 83317874  |
| 1 | 66716 length 569 cvg_10.0_tip_1 | 6.43609E-14 | 569 | 3404 | 83317874  |
| 1 | 66768 length 572 cvg_11.0_tip_1 | 2.78096E-08 | 572 | 1275 | 2981631   |
| 1 | 66772 length 572 cvg_5.0_tip_1  | 1.27E-17    | 572 | 3404 | 83317874  |
| 1 | 66774 length 572 cvg_4.0_tip_1  | 1.23211E-09 | 572 | 1275 | 92111129  |
| 1 | 66790 length 572 cvg_6.5_tip_1  | 3.71764E-09 | 572 | 3404 | 83317874  |
| 1 | 66824 length 574 cvg_10.9_tip_0 | 3.98901E-12 | 574 | 821  | 307150584 |
| 1 | 66844 length 574 cvg_5.1_tip_1  | 6.01E-23    | 574 | 3404 | 83317874  |
| 1 | 66846 length 575 cvg_7.0_tip_1  | 3.89E-22    | 575 | 3404 | 83317874  |
| 1 | 66850 length 575 cvg_7.3_tip_1  | 6.44882E-09 | 575 | 234  | 110756233 |
| 1 | 66904 length 577 cvg_8.0_tip_1  | 1.72E-17    | 577 | 3404 | 83317874  |
| 1 | 66912 length 578 cvg_3.0_tip_1  | 4.38753E-13 | 578 | 3404 | 83317874  |
| 1 | 66930 length 578 cvg_6.0_tip_0  | 2.94299E-09 | 578 | 3404 | 83317874  |
| 1 | 66970 length 580 cvg_5.0_tip_1  | 2.70E-18    | 580 | 3404 | 83317874  |
| 1 | 67006 length 581 cvg_8.0_tip_1  | 3.28E-40    | 581 | 315  | 307205528 |
| 1 | 67022 length 582 cvg_9.7_tip_1  | 4.16E-19    | 582 | 3404 | 83317874  |
| 1 | 67034 length 583 cvg_9.1_tip_1  | 1.21443E-10 | 583 | 3404 | 83317874  |
| 1 | 67046 length 584 cvg_4.0_tip_1  | 8.53E-20    | 584 | 3404 | 83317874  |
| 1 | 67056 length 584 cvg_6.9_tip_1  | 1.78E-17    | 584 | 3404 | 83317874  |
| 1 | 67062 length 584 cvg_9.0_tip_1  | 2.03E-21    | 584 | 3404 | 83317874  |
| 1 | 67068 length 584 cvg_6.0_tip_1  | 6.31E-23    | 584 | 3404 | 83317874  |
| 1 | 67076 length 585 cvg_8.0_tip_0  | 2.31655E-08 | 585 | 821  | 307150584 |
| 1 | 67156 length 589 cvg_5.0_tip_1  | 3.1953E-06  | 589 | 1153 | 322504193 |
| 1 | 67236 length 592 cvg_6.8_tip_1  | 1.29E-26    | 592 | 3404 | 83317874  |
| 1 | 67252 length 593 cvg_11.0_tip_1 | 2.60486E-11 | 593 | 358  | 146084079 |
| 1 | 67302 length 595 cvg_10.0_tip_1 | 2.05422E-08 | 595 | 527  | 170040829 |
| 1 | 67312 length 596 cvg_6.3_tip_1  | 8.63059E-07 | 596 | 229  | 322507045 |
| 1 | 67322 length 596 cvg_9.0_tip_1  | 1.73E-23    | 596 | 3404 | 83317874  |
| 1 | 67344 length 597 cvg_7.6_tip_1  | 5.95E-24    | 597 | 3404 | 83317874  |
| 1 | 67346 length 597 cvg_3.9_tip_1  | 6.79E-28    | 597 | 209  | 170573162 |
| 1 | 67354 length 597 cvg_9.1_tip_1  | 5.40586E-09 | 597 | 1275 | 74007557  |
| 1 | 67362 length 597 cvg_7.0_tip_1  | 2.59258E-11 | 597 | 3404 | 83317874  |
| 1 | 67382 length 598 cvg_8.1_tip_1  | 1.59669E-08 | 598 | 118  | 290990821 |
| 1 | 67386 length 598 cvg_9.1_tip_0  | 1.91E-22    | 598 | 3404 | 83317874  |
| 1 | 67444 length 600 cvg_5.0_tip_1  | 3.10E-20    | 600 | 3404 | 83317874  |
| 1 | 67492 length 603 cvg_9.0_tip_1  | 1.24E-24    | 603 | 3404 | 83317874  |
| 1 | 67494 length 603 cvg_5.0_tip_1  | 1.19902E-11 | 603 | 3404 | 83317874  |
| 1 | 67528 length 605 cvg_6.9_tip_1  | 2.98E-34    | 605 | 3404 | 83317874  |
| 1 | 67554 length 605 cvg_8.9_tip_1  | 5.11352E-11 | 605 | 194  | 281346081 |
| 1 | 67590 length 608 cvg_5.0_tip_1  | 1.23726E-10 | 608 | 68   | 113195393 |
| 1 | 67654 length 611 cvg_8.0_tip_1  | 2.13E-27    | 611 | 3404 | 83317874  |

|   |                                 |             |     |      |           |
|---|---------------------------------|-------------|-----|------|-----------|
| 1 | 67680 length 612 cvg_7.0_tip_1  | 3.18E-23    | 612 | 3404 | 83317874  |
| 1 | 67704 length 614 cvg_6.6_tip_0  | 4.07E-26    | 614 | 3404 | 83317874  |
| 1 | 67706 length 614 cvg_8.0_tip_0  | 4.50E-17    | 614 | 3404 | 83317874  |
| 1 | 67708 length 614 cvg_6.7_tip_0  | 1.07474E-10 | 614 | 3404 | 83317874  |
| 1 | 67802 length 618 cvg_6.7_tip_1  | 1.68E-19    | 618 | 3404 | 83317874  |
| 1 | 67842 length 619 cvg_6.0_tip_1  | 2.71E-25    | 619 | 3404 | 83317874  |
| 1 | 67846 length 619 cvg_9.9_tip_1  | 1.94979E-07 | 619 | 517  | 257876199 |
| 1 | 67860 length 620 cvg_5.0_tip_1  | 1.76E-16    | 620 | 3404 | 83317874  |
| 1 | 67864 length 620 cvg_5.8_tip_1  | 1.82072E-13 | 620 | 3404 | 83317874  |
| 1 | 67902 length 622 cvg_8.0_tip_0  | 5.91E-28    | 622 | 3404 | 83317874  |
| 1 | 67910 length 622 cvg_8.0_tip_1  | 9.80749E-07 | 622 | 1272 | 66734174  |
| 1 | 67912 length 622 cvg_7.2_tip_0  | 1.23778E-09 | 622 | 527  | 170040829 |
| 1 | 67920 length 622 cvg_8.0_tip_1  | 5.12E-16    | 622 | 3404 | 83317874  |
| 1 | 67950 length 625 cvg_6.0_tip_1  | 3.36298E-15 | 625 | 3404 | 83317874  |
| 1 | 67958 length 625 cvg_7.0_tip_1  | 7.49193E-15 | 625 | 3404 | 83317874  |
| 1 | 67980 length 626 cvg_8.2_tip_1  | 6.65076E-11 | 626 | 3404 | 83317874  |
| 1 | 67992 length 627 cvg_8.0_tip_1  | 2.87E-30    | 627 | 3404 | 83317874  |
| 1 | 67994 length 627 cvg_5.0_tip_1  | 4.28E-18    | 627 | 3404 | 83317874  |
| 1 | 68000 length 628 cvg_10.0_tip_0 | 2.55059E-10 | 628 | 821  | 307150584 |
| 1 | 68052 length 632 cvg_7.0_tip_1  | 2.80E-25    | 632 | 3404 | 83317874  |
| 1 | 68170 length 638 cvg_8.0_tip_0  | 1.25E-28    | 638 | 589  | 325074608 |
| 1 | 68174 length 638 cvg_7.0_tip_1  | 4.59E-23    | 638 | 3404 | 83317874  |
| 1 | 68182 length 638 cvg_8.0_tip_1  | 8.97E-19    | 638 | 3404 | 83317874  |
| 1 | 68198 length 639 cvg_8.0_tip_1  | 7.33E-21    | 639 | 3404 | 83317874  |
| 1 | 68204 length 639 cvg_6.0_tip_0  | 7.55E-34    | 639 | 3404 | 83317874  |
| 1 | 68206 length 639 cvg_5.0_tip_1  | 5.5208E-08  | 639 | 3404 | 83317874  |
| 1 | 68228 length 641 cvg_12.0_tip_1 | 3.91E-46    | 641 | 258  | 307177288 |
| 1 | 68232 length 641 cvg_7.7_tip_0  | 5.15535E-14 | 641 | 3404 | 83317874  |
| 1 | 68242 length 641 cvg_8.0_tip_1  | 5.32E-19    | 641 | 3404 | 83317874  |
| 1 | 68270 length 643 cvg_6.0_tip_1  | 2.0979E-07  | 643 | 3404 | 83317874  |
| 1 | 68274 length 643 cvg_8.0_tip_1  | 1.32E-49    | 643 | 209  | 170573162 |
| 1 | 68282 length 644 cvg_6.9_tip_1  | 1.79E-22    | 644 | 3404 | 83317874  |
| 1 | 68288 length 644 cvg_6.0_tip_1  | 1.73E-17    | 644 | 3404 | 83317874  |
| 1 | 68298 length 644 cvg_6.7_tip_1  | 7.30052E-08 | 644 | 3404 | 83317874  |
| 1 | 68362 length 648 cvg_8.0_tip_1  | 8.17133E-07 | 648 | 3404 | 83317874  |
| 1 | 68396 length 650 cvg_6.0_tip_1  | 2.39E-30    | 650 | 3404 | 83317874  |
| 1 | 68398 length 650 cvg_6.0_tip_1  | 9.10E-22    | 650 | 3404 | 83317874  |
| 1 | 68418 length 651 cvg_8.0_tip_1  | 7.45E-24    | 651 | 3404 | 83317874  |
| 1 | 68434 length 652 cvg_7.0_tip_1  | 9.40E-27    | 652 | 3404 | 83317874  |
| 1 | 68438 length 652 cvg_4.7_tip_1  | 1.85E-30    | 652 | 3404 | 83317874  |
| 1 | 68490 length 657 cvg_7.0_tip_1  | 3.31E-27    | 657 | 589  | 325074608 |
| 1 | 68496 length 657 cvg_7.0_tip_1  | 3.23106E-07 | 657 | 527  | 170040829 |
| 1 | 68520 length 659 cvg_8.0_tip_0  | 8.00263E-13 | 659 | 3404 | 83317874  |
| 1 | 68618 length 666 cvg_6.9_tip_1  | 1.65E-21    | 666 | 3404 | 83317874  |
| 1 | 68626 length 666 cvg_6.0_tip_1  | 7.14E-25    | 666 | 3404 | 83317874  |
| 1 | 68664 length 669 cvg_6.2_tip_1  | 6.30E-21    | 669 | 3404 | 83317874  |
| 1 | 68680 length 670 cvg_7.0_tip_1  | 3.08E-28    | 670 | 3404 | 83317874  |
| 1 | 68694 length 671 cvg_4.9_tip_1  | 2.02E-27    | 671 | 3404 | 83317874  |

|   |                                 |             |     |      |           |
|---|---------------------------------|-------------|-----|------|-----------|
| 1 | 68884 length 685 cvg_6.8_tip_1  | 2.36E-26    | 685 | 589  | 325074608 |
| 1 | 68926 length 686 cvg_7.0_tip_1  | 2.71245E-06 | 686 | 309  | 137915    |
| 1 | 68940 length 687 cvg_8.0_tip_1  | 2.07E-22    | 687 | 3404 | 83317874  |
| 1 | 68950 length 688 cvg_8.0_tip_1  | 3.94E-21    | 688 | 3404 | 83317874  |
| 1 | 68984 length 691 cvg_7.0_tip_1  | 5.70273E-12 | 691 | 3404 | 83317874  |
| 1 | 69000 length 692 cvg_5.0_tip_1  | 1.46E-23    | 692 | 3404 | 83317874  |
| 1 | 69034 length 694 cvg_4.0_tip_1  | 7.49E-28    | 694 | 3404 | 83317874  |
| 1 | 69082 length 697 cvg_7.3_tip_1  | 7.33E-23    | 697 | 3404 | 83317874  |
| 1 | 69106 length 698 cvg_10.0_tip_1 | 1.82E-21    | 698 | 3404 | 83317874  |
| 1 | 69118 length 699 cvg_7.1_tip_1  | 7.99E-25    | 699 | 3404 | 83317874  |
| 1 | 69168 length 702 cvg_6.6_tip_1  | 3.88E-19    | 702 | 3404 | 83317874  |
| 1 | 69174 length 702 cvg_6.0_tip_1  | 1.36E-32    | 702 | 3404 | 83317874  |
| 1 | 69206 length 705 cvg_5.6_tip_0  | 3.43475E-15 | 705 | 3404 | 83317874  |
| 1 | 69214 length 705 cvg_8.9_tip_1  | 2.69E-20    | 705 | 3404 | 83317874  |
| 1 | 69220 length 706 cvg_5.2_tip_1  | 1.86605E-13 | 706 | 68   | 113195393 |
| 1 | 69290 length 710 cvg_6.8_tip_1  | 1.87E-29    | 710 | 3404 | 83317874  |
| 1 | 69302 length 712 cvg_6.8_tip_1  | 4.79E-33    | 712 | 3404 | 83317874  |
| 1 | 69320 length 713 cvg_3.4_tip_1  | 1.31487E-06 | 713 | 3404 | 83317874  |
| 1 | 69336 length 715 cvg_7.0_tip_1  | 1.00E-22    | 715 | 3404 | 83317874  |
| 1 | 69364 length 718 cvg_6.0_tip_1  | 2.28E-22    | 718 | 3404 | 83317874  |
| 1 | 69404 length 720 cvg_9.0_tip_1  | 1.39E-27    | 720 | 3404 | 83317874  |
| 1 | 69412 length 721 cvg_8.0_tip_1  | 4.63E-23    | 721 | 3404 | 83317874  |
| 1 | 69446 length 723 cvg_6.0_tip_1  | 2.15E-20    | 723 | 3404 | 83317874  |
| 1 | 69452 length 723 cvg_5.6_tip_1  | 3.21E-24    | 723 | 3404 | 83317874  |
| 1 | 69470 length 724 cvg_7.6_tip_1  | 1.9067E-08  | 724 | 3404 | 83317874  |
| 1 | 69506 length 727 cvg_11.9_tip_0 | 4.10469E-11 | 727 | 1272 | 148645276 |
| 1 | 69538 length 730 cvg_8.0_tip_1  | 3.53E-18    | 730 | 3404 | 83317874  |
| 1 | 69540 length 730 cvg_6.4_tip_1  | 1.10E-27    | 730 | 3404 | 83317874  |
| 1 | 69546 length 731 cvg_7.6_tip_1  | 2.07557E-10 | 731 | 175  | 312121062 |
| 1 | 69554 length 732 cvg_10.0_tip_1 | 3.44E-21    | 732 | 589  | 325074608 |
| 1 | 69564 length 733 cvg_5.6_tip_1  | 1.07336E-14 | 733 | 3404 | 83317874  |
| 1 | 69600 length 736 cvg_6.5_tip_0  | 2.85055E-15 | 736 | 3404 | 83317874  |
| 1 | 69606 length 736 cvg_8.2_tip_1  | 5.14E-25    | 736 | 3404 | 83317874  |
| 1 | 69620 length 737 cvg_6.7_tip_0  | 1.16E-16    | 737 | 3404 | 83317874  |
| 1 | 69648 length 738 cvg_5.5_tip_1  | 1.80E-25    | 738 | 3404 | 83317874  |
| 1 | 69654 length 739 cvg_10.0_tip_0 | 3.88766E-12 | 739 | 3404 | 83317874  |
| 1 | 69676 length 741 cvg_9.0_tip_0  | 9.57563E-11 | 741 | 3404 | 83317874  |
| 1 | 69694 length 742 cvg_7.0_tip_1  | 8.41E-31    | 742 | 3404 | 83317874  |
| 1 | 69722 length 744 cvg_7.0_tip_0  | 1.94E-19    | 744 | 3404 | 83317874  |
| 1 | 69784 length 748 cvg_7.6_tip_1  | 8.32535E-10 | 748 | 3404 | 83317874  |
| 1 | 69792 length 748 cvg_8.0_tip_1  | 5.96635E-08 | 748 | 3404 | 83317874  |
| 1 | 69802 length 749 cvg_8.0_tip_1  | 1.97E-27    | 749 | 3404 | 83317874  |
| 1 | 69814 length 751 cvg_7.0_tip_0  | 1.48E-22    | 751 | 3404 | 83317874  |
| 1 | 69816 length 751 cvg_7.0_tip_1  | 6.21393E-13 | 751 | 3404 | 83317874  |
| 1 | 69852 length 754 cvg_9.0_tip_1  | 1.68E-26    | 754 | 3404 | 83317874  |
| 1 | 69870 length 755 cvg_6.0_tip_1  | 9.63E-30    | 755 | 3404 | 83317874  |
| 1 | 69888 length 757 cvg_6.5_tip_1  | 7.22E-17    | 757 | 3404 | 83317874  |
| 1 | 69910 length 759 cvg_6.9_tip_1  | 6.94E-20    | 759 | 3404 | 83317874  |

|   |                                |             |     |      |           |
|---|--------------------------------|-------------|-----|------|-----------|
| 1 | 69930 length 761 cvg_8.0_tip_1 | 6.48E-26    | 761 | 3404 | 83317874  |
| 1 | 69932 length 761 cvg_8.0_tip_0 | 8.18E-29    | 761 | 3404 | 83317874  |
| 1 | 69964 length 764 cvg_7.8_tip_0 | 3.2589E-09  | 764 | 68   | 113195393 |
| 1 | 69970 length 764 cvg_6.2_tip_1 | 1.01E-18    | 764 | 3404 | 83317874  |
| 1 | 70032 length 771 cvg_7.0_tip_1 | 1.26E-32    | 771 | 589  | 325074608 |
| 1 | 70052 length 773 cvg_5.6_tip_1 | 3.00E-34    | 773 | 3404 | 83317874  |
| 1 | 70064 length 774 cvg_7.0_tip_1 | 1.71E-21    | 774 | 3404 | 83317874  |
| 1 | 70076 length 774 cvg_5.0_tip_1 | 1.97531E-09 | 774 | 3404 | 83317874  |
| 1 | 70124 length 780 cvg_4.9_tip_1 | 5.22E-26    | 780 | 3404 | 83317874  |
| 1 | 70130 length 781 cvg_8.6_tip_1 | 7.89502E-06 | 781 | 3404 | 83317874  |
| 1 | 70146 length 783 cvg_6.9_tip_1 | 3.30932E-12 | 783 | 3404 | 83317874  |
| 1 | 70174 length 784 cvg_8.0_tip_1 | 8.21688E-11 | 784 | 3404 | 83317874  |
| 1 | 70182 length 785 cvg_6.0_tip_0 | 3.80E-24    | 785 | 3404 | 83317874  |
| 1 | 70226 length 790 cvg_7.0_tip_1 | 1.46E-31    | 790 | 3404 | 83317874  |
| 1 | 70246 length 791 cvg_7.0_tip_1 | 7.78E-25    | 791 | 3404 | 83317874  |
| 1 | 70262 length 793 cvg_7.0_tip_0 | 1.06E-21    | 793 | 3404 | 83317874  |
| 1 | 70272 length 795 cvg_7.0_tip_0 | 1.58E-25    | 795 | 3404 | 83317874  |
| 1 | 70274 length 795 cvg_8.5_tip_0 | 2.36571E-13 | 795 | 3404 | 83317874  |
| 1 | 70316 length 798 cvg_5.1_tip_1 | 6.51E-27    | 798 | 3404 | 83317874  |
| 1 | 70342 length 802 cvg_9.9_tip_0 | 4.31787E-15 | 802 | 700  | 270013850 |
| 1 | 70408 length 809 cvg_8.2_tip_1 | 9.03E-16    | 809 | 3404 | 83317874  |
| 1 | 70410 length 809 cvg_9.0_tip_1 | 2.29E-27    | 809 | 3404 | 83317874  |
| 1 | 70436 length 813 cvg_8.0_tip_1 | 8.0264E-12  | 813 | 3404 | 83317874  |
| 1 | 70444 length 814 cvg_7.1_tip_1 | 1.12E-21    | 814 | 3404 | 83317874  |
| 1 | 70462 length 816 cvg_8.0_tip_1 | 6.52E-22    | 816 | 3404 | 83317874  |
| 1 | 70464 length 816 cvg_6.3_tip_1 | 2.32E-19    | 816 | 3404 | 83317874  |
| 1 | 70490 length 818 cvg_7.0_tip_1 | 1.27525E-09 | 818 | 3404 | 83317874  |
| 1 | 70562 length 829 cvg_8.0_tip_1 | 9.39E-16    | 829 | 3404 | 83317874  |
| 1 | 70566 length 830 cvg_4.7_tip_1 | 5.51657E-08 | 830 | 68   | 113195393 |
| 1 | 70568 length 830 cvg_7.5_tip_1 | 3.56E-23    | 830 | 3404 | 83317874  |
| 1 | 70644 length 842 cvg_9.0_tip_1 | 1.2614E-15  | 842 | 821  | 307150584 |
| 1 | 70658 length 844 cvg_7.9_tip_1 | 5.52262E-11 | 844 | 3404 | 83317874  |
| 1 | 70674 length 847 cvg_9.0_tip_0 | 1.60684E-10 | 847 | 175  | 312121062 |
| 1 | 70680 length 847 cvg_7.6_tip_1 | 1.61E-18    | 847 | 3980 | 296004518 |
| 1 | 70712 length 850 cvg_5.0_tip_1 | 1.57431E-13 | 850 | 3404 | 83317874  |
| 1 | 70728 length 852 cvg_7.7_tip_1 | 1.20E-29    | 852 | 3404 | 83317874  |
| 1 | 70740 length 854 cvg_8.0_tip_1 | 2.88E-23    | 854 | 3404 | 83317874  |
| 1 | 70748 length 855 cvg_7.0_tip_1 | 2.81E-18    | 855 | 3404 | 83317874  |
| 1 | 70764 length 857 cvg_6.5_tip_1 | 3.77E-39    | 857 | 589  | 325074608 |
| 1 | 70778 length 860 cvg_7.0_tip_1 | 1.60666E-13 | 860 | 3404 | 83317874  |
| 1 | 70780 length 860 cvg_5.0_tip_1 | 2.82E-26    | 860 | 3404 | 83317874  |
| 1 | 70806 length 864 cvg_7.1_tip_1 | 7.74E-24    | 864 | 3404 | 83317874  |
| 1 | 70810 length 865 cvg_7.0_tip_1 | 1.98E-35    | 865 | 589  | 325074608 |
| 1 | 70820 length 866 cvg_8.5_tip_1 | 4.57E-24    | 866 | 3404 | 83317874  |
| 1 | 70830 length 867 cvg_5.0_tip_1 | 1.38E-20    | 867 | 3404 | 83317874  |
| 1 | 70832 length 867 cvg_8.7_tip_1 | 2.96E-23    | 867 | 3404 | 83317874  |
| 1 | 70840 length 868 cvg_9.0_tip_1 | 5.2725E-12  | 868 | 3404 | 83317874  |
| 1 | 70848 length 870 cvg_7.1_tip_1 | 6.62E-31    | 870 | 3404 | 83317874  |

|   |                                 |             |     |      |           |
|---|---------------------------------|-------------|-----|------|-----------|
| 1 | 70886 length 876 cvg_7.8_tip_0  | 2.02E-27    | 876 | 589  | 325074608 |
| 1 | 70896 length 878 cvg_6.0_tip_1  | 2.41E-20    | 878 | 3404 | 83317874  |
| 1 | 70908 length 879 cvg_5.3_tip_0  | 8.82E-31    | 879 | 3404 | 83317874  |
| 1 | 70916 length 880 cvg_6.2_tip_1  | 7.76374E-11 | 880 | 3404 | 83317874  |
| 1 | 70934 length 883 cvg_7.0_tip_1  | 1.16E-30    | 883 | 3404 | 83317874  |
| 1 | 70936 length 884 cvg_8.0_tip_1  | 2.95E-18    | 884 | 3404 | 83317874  |
| 1 | 70954 length 888 cvg_9.0_tip_0  | 1.16E-22    | 888 | 3404 | 83317874  |
| 1 | 70964 length 889 cvg_8.8_tip_0  | 2.78E-16    | 889 | 3404 | 83317874  |
| 1 | 70976 length 891 cvg_7.5_tip_1  | 1.07E-23    | 891 | 3404 | 83317874  |
| 1 | 71010 length 894 cvg_7.0_tip_1  | 3.66E-32    | 894 | 242  | 310128585 |
| 1 | 71042 length 900 cvg_3.0_tip_1  | 1.61701E-11 | 900 | 3404 | 83317874  |
| 1 | 71072 length 903 cvg_63.5_tip_1 | 1.92565E-10 | 903 | 230  | 309270393 |
| 1 | 71082 length 904 cvg_7.0_tip_1  | 1.38589E-10 | 904 | 245  | 312116944 |
| 1 | 71090 length 906 cvg_7.0_tip_0  | 2.51E-28    | 906 | 3404 | 83317874  |
| 1 | 71148 length 916 cvg_8.0_tip_1  | 1.08E-26    | 916 | 3404 | 83317874  |
| 1 | 71154 length 917 cvg_6.5_tip_1  | 2.66E-33    | 917 | 589  | 325074608 |
| 1 | 71162 length 917 cvg_5.0_tip_1  | 2.54E-19    | 917 | 589  | 325074608 |
| 1 | 71166 length 918 cvg_8.0_tip_1  | 2.41E-26    | 918 | 3404 | 83317874  |
| 1 | 71198 length 921 cvg_5.5_tip_1  | 5.45E-18    | 921 | 3404 | 83317874  |
| 1 | 71204 length 922 cvg_9.0_tip_1  | 4.04E-13    | 922 | 3404 | 83317874  |
| 1 | 71210 length 923 cvg_10.0_tip_0 | 1.25879E-06 | 923 | 821  | 307150584 |
| 1 | 71226 length 924 cvg_4.0_tip_1  | 1.4923E-15  | 924 | 131  | 242069637 |
| 1 | 71234 length 925 cvg_5.6_tip_1  | 3.00E-24    | 925 | 3404 | 83317874  |
| 1 | 71240 length 926 cvg_9.0_tip_0  | 6.69815E-08 | 926 | 700  | 270013850 |
| 1 | 71274 length 930 cvg_7.0_tip_1  | 2.03E-28    | 930 | 3404 | 83317874  |
| 1 | 71278 length 930 cvg_7.0_tip_1  | 2.47E-26    | 930 | 3404 | 83317874  |
| 1 | 71282 length 931 cvg_7.3_tip_1  | 1.11E-34    | 931 | 589  | 325074608 |
| 1 | 71290 length 932 cvg_6.6_tip_1  | 5.92E-20    | 932 | 589  | 325074608 |
| 1 | 71296 length 933 cvg_8.2_tip_1  | 3.04E-24    | 933 | 3404 | 83317874  |
| 1 | 71334 length 939 cvg_8.0_tip_1  | 5.44E-29    | 939 | 3404 | 83317874  |
| 1 | 71358 length 943 cvg_7.4_tip_1  | 1.75762E-11 | 943 | 175  | 312121062 |
| 1 | 71370 length 944 cvg_6.9_tip_1  | 3.11E-24    | 944 | 3404 | 83317874  |
| 1 | 71414 length 950 cvg_6.7_tip_1  | 1.23E-28    | 950 | 3404 | 83317874  |
| 1 | 71424 length 953 cvg_5.7_tip_0  | 1.51E-26    | 953 | 3404 | 83317874  |
| 1 | 71446 length 956 cvg_6.7_tip_1  | 7.06E-32    | 956 | 3404 | 83317874  |
| 1 | 71454 length 956 cvg_8.7_tip_1  | 2.6952E-15  | 956 | 3404 | 83317874  |
| 1 | 71456 length 957 cvg_8.0_tip_1  | 6.6909E-06  | 957 | 3404 | 83317874  |
| 1 | 71474 length 959 cvg_7.0_tip_1  | 1.39191E-11 | 959 | 3404 | 83317874  |
| 1 | 71478 length 960 cvg_8.9_tip_1  | 2.29963E-06 | 960 | 700  | 270013850 |
| 1 | 71482 length 960 cvg_7.0_tip_0  | 3.10084E-11 | 960 | 3404 | 83317874  |
| 1 | 71498 length 964 cvg_7.0_tip_1  | 2.96E-38    | 964 | 589  | 325074608 |
| 1 | 71506 length 965 cvg_8.6_tip_1  | 4.32E-21    | 965 | 3404 | 83317874  |
| 1 | 71536 length 970 cvg_5.3_tip_1  | 1.66E-20    | 970 | 3404 | 83317874  |
| 1 | 71542 length 972 cvg_7.0_tip_1  | 1.04E-30    | 972 | 3404 | 83317874  |
| 1 | 71544 length 972 cvg_7.0_tip_0  | 2.55E-29    | 972 | 3404 | 83317874  |
| 1 | 71570 length 977 cvg_7.0_tip_0  | 4.55E-34    | 977 | 589  | 325074608 |
| 1 | 71582 length 978 cvg_8.0_tip_1  | 7.05E-19    | 978 | 3404 | 83317874  |
| 1 | 71598 length 981 cvg_7.0_tip_1  | 5.43794E-11 | 981 | 3404 | 83317874  |

|   |                                  |             |      |      |           |
|---|----------------------------------|-------------|------|------|-----------|
| 1 | 71620 length 989 cvg_5.5_tip_1   | 1.11E-27    | 989  | 3404 | 83317874  |
| 1 | 71632 length 991 cvg_8.0_tip_1   | 1.49E-32    | 991  | 589  | 325074608 |
| 1 | 71652 length 996 cvg_8.7_tip_1   | 1.05E-17    | 996  | 3404 | 83317874  |
| 1 | 71668 length 998 cvg_7.0_tip_1   | 3.75E-23    | 998  | 3404 | 83317874  |
| 1 | 71674 length 999 cvg_5.4_tip_1   | 3.17954E-14 | 999  | 3404 | 83317874  |
| 1 | 71680 length 1001 cvg_10.0_tip_1 | 6.86E-25    | 1001 | 589  | 325074608 |
| 1 | 71696 length 1003 cvg_8.7_tip_1  | 1.34969E-12 | 1003 | 3404 | 83317874  |
| 1 | 71714 length 1006 cvg_7.2_tip_1  | 1.26327E-10 | 1006 | 3404 | 83317874  |
| 1 | 71738 length 1010 cvg_7.0_tip_1  | 5.92831E-08 | 1010 | 3404 | 83317874  |
| 1 | 71746 length 1011 cvg_8.0_tip_1  | 2.65E-16    | 1011 | 3404 | 83317874  |
| 1 | 71790 length 1020 cvg_20.8_tip_0 | 2.45574E-09 | 1020 | 3404 | 83317874  |
| 1 | 71860 length 1032 cvg_8.1_tip_1  | 2.11E-16    | 1032 | 3404 | 83317874  |
| 1 | 71870 length 1034 cvg_10.0_tip_0 | 1.46834E-09 | 1034 | 821  | 307150584 |
| 1 | 71896 length 1041 cvg_7.3_tip_0  | 9.92211E-14 | 1041 | 3404 | 83317874  |
| 1 | 71942 length 1054 cvg_9.0_tip_0  | 4.37E-17    | 1054 | 3404 | 83317874  |
| 1 | 71950 length 1056 cvg_8.0_tip_0  | 4.80E-32    | 1056 | 589  | 325074608 |
| 1 | 71982 length 1062 cvg_8.0_tip_1  | 3.07E-18    | 1062 | 3404 | 83317874  |
| 1 | 71994 length 1063 cvg_7.7_tip_1  | 4.55E-22    | 1063 | 589  | 325074608 |
| 1 | 72018 length 1065 cvg_7.9_tip_1  | 2.51417E-12 | 1065 | 68   | 113195393 |
| 1 | 72032 length 1069 cvg_8.5_tip_1  | 1.70E-16    | 1069 | 3404 | 83317874  |
| 1 | 72066 length 1082 cvg_5.9_tip_1  | 5.72E-36    | 1082 | 589  | 325074608 |
| 1 | 72106 length 1090 cvg_6.6_tip_0  | 6.42E-27    | 1090 | 589  | 325074608 |
| 1 | 72122 length 1095 cvg_7.5_tip_1  | 1.64E-30    | 1095 | 589  | 325074608 |
| 1 | 72128 length 1097 cvg_7.4_tip_1  | 1.89E-18    | 1097 | 3404 | 83317874  |
| 1 | 72130 length 1097 cvg_7.9_tip_1  | 4.80E-30    | 1097 | 3404 | 83317874  |
| 1 | 72144 length 1101 cvg_7.5_tip_1  | 9.79304E-15 | 1101 | 3404 | 83317874  |
| 1 | 72150 length 1102 cvg_6.8_tip_1  | 2.75E-17    | 1102 | 3404 | 83317874  |
| 1 | 72158 length 1104 cvg_7.0_tip_1  | 1.15E-23    | 1104 | 3404 | 83317874  |
| 1 | 72174 length 1106 cvg_7.0_tip_1  | 1.28E-30    | 1106 | 589  | 325074608 |
| 1 | 72188 length 1112 cvg_9.0_tip_1  | 2.99237E-06 | 1112 | 589  | 325074608 |
| 1 | 72192 length 1112 cvg_6.7_tip_1  | 4.60916E-12 | 1112 | 175  | 312121062 |
| 1 | 72228 length 1120 cvg_9.0_tip_0  | 1.59E-28    | 1120 | 3404 | 83317874  |
| 1 | 72232 length 1121 cvg_6.0_tip_1  | 5.89297E-15 | 1121 | 3404 | 83317874  |
| 1 | 72240 length 1122 cvg_9.0_tip_1  | 1.96E-34    | 1122 | 3404 | 83317874  |
| 1 | 72256 length 1127 cvg_10.0_tip_1 | 3.48E-23    | 1127 | 3404 | 83317874  |
| 1 | 72272 length 1131 cvg_7.1_tip_1  | 1.47E-29    | 1131 | 589  | 325074608 |
| 1 | 72284 length 1138 cvg_7.1_tip_1  | 4.62E-23    | 1138 | 589  | 325074608 |
| 1 | 72286 length 1139 cvg_8.3_tip_0  | 1.22E-23    | 1139 | 589  | 325074608 |
| 1 | 72298 length 1142 cvg_9.0_tip_1  | 1.30E-25    | 1142 | 589  | 325074608 |
| 1 | 72332 length 1154 cvg_8.0_tip_0  | 5.33E-27    | 1154 | 3404 | 83317874  |
| 1 | 72378 length 1164 cvg_8.8_tip_1  | 2.94072E-08 | 1164 | 821  | 307150584 |
| 1 | 72408 length 1174 cvg_67.7_tip_0 | 3.32E-16    | 1174 | 321  | 84620605  |
| 1 | 72414 length 1174 cvg_7.6_tip_1  | 8.79989E-09 | 1174 | 3404 | 83317874  |
| 1 | 72426 length 1178 cvg_9.0_tip_1  | 3.03E-17    | 1178 | 3404 | 83317874  |
| 1 | 72444 length 1183 cvg_6.0_tip_1  | 3.23E-35    | 1183 | 589  | 325074608 |
| 1 | 72454 length 1186 cvg_7.7_tip_0  | 1.85E-22    | 1186 | 3404 | 83317874  |
| 1 | 72460 length 1188 cvg_8.0_tip_1  | 1.52E-16    | 1188 | 589  | 325074608 |
| 1 | 72490 length 1200 cvg_9.0_tip_1  | 9.43429E-06 | 1200 | 700  | 270013850 |

|   |                                  |             |      |      |           |
|---|----------------------------------|-------------|------|------|-----------|
| 1 | 72524 length 1215 cvg_6.6_tip_1  | 3.40E-19    | 1215 | 589  | 325074608 |
| 1 | 72538 length 1221 cvg_8.6_tip_1  | 7.34E-30    | 1221 | 3404 | 83317874  |
| 1 | 72584 length 1236 cvg_7.6_tip_0  | 1.61E-40    | 1236 | 3404 | 83317874  |
| 1 | 72586 length 1236 cvg_6.0_tip_1  | 5.94E-19    | 1236 | 3404 | 83317874  |
| 1 | 72594 length 1239 cvg_9.0_tip_1  | 4.42081E-14 | 1239 | 3404 | 83317874  |
| 1 | 72602 length 1240 cvg_7.1_tip_1  | 2.97625E-10 | 1240 | 3404 | 83317874  |
| 1 | 72612 length 1242 cvg_7.0_tip_1  | 2.35E-23    | 1242 | 3404 | 83317874  |
| 1 | 72642 length 1251 cvg_7.0_tip_0  | 6.90E-39    | 1251 | 589  | 325074608 |
| 1 | 72664 length 1257 cvg_7.0_tip_1  | 3.58E-27    | 1257 | 3404 | 83317874  |
| 1 | 72714 length 1277 cvg_9.0_tip_0  | 3.28E-20    | 1277 | 3404 | 83317874  |
| 1 | 72720 length 1281 cvg_7.0_tip_1  | 7.07E-47    | 1281 | 717  | 325085610 |
| 1 | 72730 length 1285 cvg_7.3_tip_1  | 1.13947E-12 | 1285 | 3404 | 83317874  |
| 1 | 72748 length 1299 cvg_6.7_tip_1  | 2.04E-25    | 1299 | 589  | 325074608 |
| 1 | 72760 length 1305 cvg_9.0_tip_1  | 6.40606E-11 | 1305 | 175  | 312121062 |
| 1 | 72784 length 1317 cvg_6.3_tip_1  | 2.37E-29    | 1317 | 717  | 325085610 |
| 1 | 72804 length 1326 cvg_9.0_tip_1  | 4.38E-23    | 1326 | 3404 | 83317874  |
| 1 | 72812 length 1333 cvg_10.0_tip_0 | 1.12E-26    | 1333 | 3404 | 83317874  |
| 1 | 72826 length 1341 cvg_9.0_tip_0  | 1.17725E-07 | 1341 | 3404 | 83317874  |
| 1 | 72840 length 1350 cvg_8.2_tip_0  | 1.00643E-06 | 1350 | 821  | 307150584 |
| 1 | 72860 length 1363 cvg_7.6_tip_1  | 2.11E-36    | 1363 | 717  | 325085610 |
| 1 | 72874 length 1370 cvg_7.5_tip_1  | 6.40E-33    | 1370 | 3404 | 83317874  |
| 1 | 72892 length 1379 cvg_8.0_tip_0  | 3.55E-31    | 1379 | 589  | 325074608 |
| 1 | 72906 length 1384 cvg_7.0_tip_1  | 1.84169E-11 | 1384 | 3404 | 83317874  |
| 1 | 72908 length 1386 cvg_7.6_tip_1  | 7.95E-31    | 1386 | 717  | 325085610 |
| 1 | 72914 length 1391 cvg_7.2_tip_1  | 4.70E-23    | 1391 | 3404 | 83317874  |
| 1 | 72924 length 1400 cvg_7.0_tip_1  | 1.32E-25    | 1400 | 717  | 325085610 |
| 1 | 72936 length 1414 cvg_7.0_tip_1  | 6.01E-26    | 1414 | 3404 | 83317874  |
| 1 | 72944 length 1416 cvg_8.0_tip_1  | 1.70E-28    | 1416 | 3404 | 83317874  |
| 1 | 72952 length 1421 cvg_8.0_tip_1  | 1.35857E-09 | 1421 | 3404 | 83317874  |
| 1 | 72992 length 1441 cvg_10.4_tip_0 | 1.52E-32    | 1441 | 3404 | 83317874  |
| 1 | 72994 length 1442 cvg_7.0_tip_1  | 3.41725E-08 | 1442 | 3404 | 83317874  |
| 1 | 73014 length 1455 cvg_8.0_tip_1  | 2.83E-18    | 1455 | 3404 | 83317874  |
| 1 | 73018 length 1456 cvg_55.3_tip_0 | 5.35028E-09 | 1456 | 170  | 312096252 |
| 1 | 73028 length 1465 cvg_7.0_tip_1  | 4.10E-25    | 1465 | 717  | 325085610 |
| 1 | 73036 length 1469 cvg_6.5_tip_1  | 4.85E-42    | 1469 | 717  | 325085610 |
| 1 | 73066 length 1492 cvg_8.0_tip_1  | 1.15E-30    | 1492 | 3404 | 83317874  |
| 1 | 73068 length 1493 cvg_8.0_tip_1  | 4.36E-30    | 1493 | 589  | 325074608 |
| 1 | 73072 length 1495 cvg_6.2_tip_0  | 2.56E-22    | 1495 | 3404 | 83317874  |
| 1 | 73082 length 1502 cvg_7.0_tip_0  | 5.36E-36    | 1502 | 589  | 325074608 |
| 1 | 73088 length 1507 cvg_9.0_tip_1  | 1.67E-29    | 1507 | 589  | 325074608 |
| 1 | 73090 length 1507 cvg_7.1_tip_1  | 5.22E-31    | 1507 | 717  | 325085610 |
| 1 | 73094 length 1510 cvg_8.0_tip_1  | 6.88449E-07 | 1510 | 175  | 312121062 |
| 1 | 73102 length 1516 cvg_6.9_tip_1  | 7.84E-27    | 1516 | 3404 | 83317874  |
| 1 | 73130 length 1531 cvg_6.2_tip_1  | 1.27E-40    | 1531 | 717  | 325085610 |
| 1 | 73140 length 1535 cvg_7.5_tip_0  | 4.11E-23    | 1535 | 3404 | 83317874  |
| 1 | 73142 length 1536 cvg_14.0_tip_1 | 2.41185E-10 | 1536 | 413  | 82013847  |
| 1 | 73144 length 1536 cvg_8.0_tip_1  | 6.14E-27    | 1536 | 3404 | 83317874  |
| 1 | 73154 length 1541 cvg_7.9_tip_0  | 1.67E-32    | 1541 | 717  | 325085610 |



|   |                                  |             |      |      |           |
|---|----------------------------------|-------------|------|------|-----------|
| 1 | 73160 length 1544 cvg_8.0_tip_1  | 2.81212E-12 | 1544 | 821  | 307150584 |
| 1 | 73178 length 1557 cvg_7.3_tip_1  | 1.48E-28    | 1557 | 717  | 325085610 |
| 1 | 73198 length 1580 cvg_12.0_tip_1 | 1.28E-19    | 1580 | 559  | 70908135  |
| 1 | 73238 length 1626 cvg_15.0_tip_1 | 2.19804E-08 | 1626 | 300  | 296216059 |
| 1 | 73262 length 1669 cvg_6.6_tip_1  | 2.05827E-15 | 1669 | 3404 | 83317874  |
| 1 | 73278 length 1689 cvg_7.2_tip_1  | 6.95E-19    | 1689 | 3404 | 83317874  |
| 1 | 73280 length 1689 cvg_7.4_tip_1  | 1.39E-27    | 1689 | 717  | 325085610 |
| 1 | 73290 length 1701 cvg_7.2_tip_0  | 9.79307E-13 | 1701 | 3404 | 83317874  |
| 1 | 73294 length 1705 cvg_8.0_tip_1  | 1.15E-29    | 1705 | 717  | 325085610 |
| 1 | 73304 length 1719 cvg_7.1_tip_1  | 3.39E-37    | 1719 | 717  | 325085610 |
| 1 | 73308 length 1723 cvg_7.7_tip_1  | 1.70E-20    | 1723 | 3404 | 83317874  |
| 1 | 73314 length 1739 cvg_7.0_tip_1  | 1.03E-33    | 1739 | 717  | 325085610 |
| 1 | 73318 length 1744 cvg_8.0_tip_1  | 2.39066E-14 | 1744 | 3404 | 83317874  |
| 1 | 73328 length 1759 cvg_10.0_tip_1 | 6.76E-18    | 1759 | 700  | 270013850 |
| 1 | 73334 length 1765 cvg_8.2_tip_1  | 2.69179E-13 | 1765 | 3404 | 83317874  |
| 1 | 73344 length 1777 cvg_7.1_tip_1  | 2.52E-27    | 1777 | 3404 | 83317874  |
| 1 | 73356 length 1802 cvg_8.0_tip_1  | 7.76E-24    | 1802 | 3404 | 83317874  |
| 1 | 73358 length 1804 cvg_8.2_tip_1  | 1.79597E-12 | 1804 | 3404 | 83317874  |
| 1 | 73360 length 1809 cvg_8.0_tip_1  | 4.90E-18    | 1809 | 3404 | 83317874  |
| 1 | 73366 length 1815 cvg_8.0_tip_1  | 6.17E-37    | 1815 | 589  | 325074608 |
| 1 | 73368 length 1816 cvg_7.6_tip_0  | 3.28E-38    | 1816 | 589  | 325074608 |
| 1 | 73372 length 1822 cvg_7.5_tip_1  | 5.06E-47    | 1822 | 911  | 189442218 |
| 1 | 73384 length 1836 cvg_8.0_tip_1  | 2.03358E-11 | 1836 | 175  | 312121062 |
| 1 | 73388 length 1840 cvg_7.5_tip_1  | 1.11E-25    | 1840 | 3404 | 83317874  |
| 1 | 73390 length 1846 cvg_8.0_tip_1  | 1.91E-17    | 1846 | 3404 | 83317874  |
| 1 | 73396 length 1864 cvg_8.0_tip_0  | 2.88E-29    | 1864 | 717  | 325085610 |
| 1 | 73398 length 1869 cvg_6.3_tip_1  | 2.80E-24    | 1869 | 333  | 315034652 |
| 1 | 73404 length 1874 cvg_11.0_tip_1 | 1.03E-42    | 1874 | 1887 | 302838799 |
| 1 | 73406 length 1883 cvg_7.0_tip_1  | 4.81E-32    | 1883 | 717  | 325085610 |
| 1 | 73410 length 1890 cvg_7.3_tip_1  | 4.84E-32    | 1890 | 717  | 325085610 |
| 1 | 73414 length 1898 cvg_5.6_tip_1  | 3.06E-18    | 1898 | 3404 | 83317874  |
| 1 | 73432 length 1929 cvg_8.5_tip_1  | 4.80E-35    | 1929 | 717  | 325085610 |
| 1 | 73452 length 1961 cvg_7.8_tip_0  | 6.13E-38    | 1961 | 717  | 325085610 |
| 1 | 73462 length 1991 cvg_8.3_tip_1  | 2.02595E-12 | 1991 | 589  | 325074608 |
| 1 | 73468 length 1997 cvg_8.0_tip_1  | 1.19E-28    | 1997 | 717  | 325085610 |
| 1 | 73472 length 2004 cvg_7.2_tip_1  | 9.72E-39    | 2004 | 724  | 115757056 |
| 1 | 73474 length 2004 cvg_8.0_tip_1  | 9.48369E-10 | 2004 | 245  | 312116944 |
| 1 | 73480 length 2025 cvg_8.0_tip_1  | 9.90E-23    | 2025 | 3404 | 83317874  |
| 1 | 73498 length 2042 cvg_7.8_tip_1  | 1.54828E-15 | 2042 | 3404 | 83317874  |
| 1 | 73518 length 2098 cvg_7.1_tip_1  | 4.05E-43    | 2098 | 717  | 325085610 |
| 1 | 73522 length 2108 cvg_7.2_tip_0  | 8.78E-38    | 2108 | 724  | 115757056 |
| 1 | 73532 length 2132 cvg_17.0_tip_0 | 3.52E-18    | 2132 | 3404 | 83317874  |
| 1 | 73542 length 2146 cvg_12.3_tip_0 | 5.10E-33    | 2146 | 589  | 325074608 |
| 1 | 73544 length 2152 cvg_8.0_tip_1  | 2.62E-37    | 2152 | 724  | 115757056 |
| 1 | 73566 length 2218 cvg_9.0_tip_1  | 1.88E-30    | 2218 | 3039 | 42519588  |
| 1 | 73586 length 2280 cvg_7.0_tip_1  | 8.70E-47    | 2280 | 1455 | 326679400 |
| 1 | 73588 length 2282 cvg_7.4_tip_0  | 3.09E-44    | 2282 | 911  | 189442218 |
| 1 | 73594 length 2313 cvg_9.9_tip_1  | 8.61E-26    | 2313 | 3404 | 83317874  |

|   |                                  |             |      |      |           |
|---|----------------------------------|-------------|------|------|-----------|
| 1 | 73598 length 2321 cvg_7.2_tip_1  | 3.17E-28    | 2321 | 724  | 115757056 |
| 1 | 73600 length 2325 cvg_8.0_tip_1  | 2.60E-30    | 2325 | 717  | 325085610 |
| 1 | 73602 length 2335 cvg_9.0_tip_1  | 4.59E-43    | 2335 | 1551 | 326679416 |
| 1 | 73622 length 2399 cvg_8.0_tip_1  | 4.03E-34    | 2399 | 717  | 325085610 |
| 1 | 73624 length 2414 cvg_8.5_tip_1  | 4.36E-20    | 2414 | 3404 | 83317874  |
| 1 | 73626 length 2416 cvg_8.0_tip_1  | 1.35E-37    | 2416 | 717  | 325085610 |
| 1 | 73628 length 2424 cvg_6.9_tip_1  | 4.36E-36    | 2424 | 911  | 189442218 |
| 1 | 73636 length 2503 cvg_8.6_tip_1  | 1.83E-37    | 2503 | 717  | 325085610 |
| 1 | 73646 length 2536 cvg_7.0_tip_1  | 5.60E-34    | 2536 | 3404 | 83317874  |
| 1 | 73648 length 2537 cvg_9.0_tip_1  | 3.54E-18    | 2537 | 700  | 270013850 |
| 1 | 73652 length 2555 cvg_7.2_tip_1  | 1.88E-29    | 2555 | 717  | 325085610 |
| 1 | 73654 length 2559 cvg_9.0_tip_1  | 8.21E-17    | 2559 | 3404 | 83317874  |
| 1 | 73658 length 2581 cvg_8.0_tip_0  | 4.53E-31    | 2581 | 589  | 325074608 |
| 1 | 73682 length 2715 cvg_8.0_tip_1  | 2.16E-39    | 2715 | 1551 | 326679416 |
| 1 | 73686 length 2762 cvg_8.2_tip_0  | 6.44651E-15 | 2762 | 3404 | 83317874  |
| 1 | 73688 length 2788 cvg_9.2_tip_1  | 1.30399E-15 | 2788 | 3404 | 83317874  |
| 1 | 73690 length 2802 cvg_7.5_tip_1  | 1.35E-44    | 2802 | 1551 | 326679416 |
| 1 | 73700 length 2902 cvg_10.0_tip_1 | 4.82923E-08 | 2902 | 700  | 270013850 |
| 1 | 73704 length 2910 cvg_8.0_tip_1  | 9.79E-30    | 2910 | 589  | 325074608 |
| 1 | 73708 length 2918 cvg_6.8_tip_1  | 1.16E-46    | 2918 | 911  | 189442218 |
| 1 | 73710 length 3000 cvg_8.0_tip_1  | 2.11E-35    | 3000 | 717  | 325085610 |
| 1 | 73718 length 3055 cvg_7.9_tip_1  | 3.13E-18    | 3055 | 3404 | 83317874  |
| 1 | 73720 length 3065 cvg_21.9_tip_1 | 5.73302E-10 | 3065 | 700  | 270013850 |
| 1 | 73722 length 3084 cvg_9.1_tip_0  | 1.97009E-09 | 3084 | 821  | 307150584 |
| 1 | 73724 length 3088 cvg_8.0_tip_1  | 2.67E-33    | 3088 | 717  | 325085610 |
| 1 | 73726 length 3103 cvg_8.0_tip_1  | 1.13E-31    | 3103 | 1551 | 326679416 |
| 1 | 73728 length 3126 cvg_8.0_tip_0  | 2.37E-37    | 3126 | 724  | 115757056 |
| 1 | 73734 length 3268 cvg_8.0_tip_1  | 1.61E-36    | 3268 | 717  | 325085610 |
| 1 | 73738 length 3312 cvg_8.0_tip_1  | 1.12E-61    | 3312 | 1551 | 326679416 |
| 1 | 73742 length 3337 cvg_8.0_tip_1  | 3.01E-30    | 3337 | 717  | 325085610 |
| 1 | 73744 length 3337 cvg_8.0_tip_1  | 1.82E-35    | 3337 | 717  | 325085610 |
| 1 | 73746 length 3357 cvg_6.9_tip_1  | 7.68E-42    | 3357 | 724  | 115757056 |
| 1 | 73748 length 3365 cvg_6.4_tip_1  | 1.28E-28    | 3365 | 3404 | 83317874  |
| 1 | 73750 length 3431 cvg_7.3_tip_1  | 2.47E-19    | 3431 | 3404 | 83317874  |
| 1 | 73754 length 3584 cvg_7.6_tip_1  | 1.28E-18    | 3584 | 3404 | 83317874  |
| 1 | 73760 length 3740 cvg_9.0_tip_1  | 3.18E-36    | 3740 | 724  | 115757056 |
| 1 | 73762 length 3763 cvg_8.0_tip_1  | 2.14E-48    | 3763 | 1551 | 326679416 |
| 1 | 73764 length 3777 cvg_7.8_tip_1  | 6.74E-18    | 3777 | 3404 | 83317874  |
| 1 | 73766 length 3961 cvg_7.6_tip_0  | 5.80E-28    | 3961 | 717  | 325085610 |
| 1 | 73770 length 4213 cvg_7.4_tip_1  | 2.94E-54    | 4213 | 1551 | 326679416 |
| 1 | 73772 length 4230 cvg_8.0_tip_1  | 7.59E-26    | 4230 | 3404 | 83317874  |
| 1 | 73776 length 4322 cvg_8.2_tip_1  | 7.95E-63    | 4322 | 1551 | 326679416 |
| 1 | 73778 length 4443 cvg_6.7_tip_1  | 7.19E-59    | 4443 | 1551 | 326679416 |
| 1 | 73782 length 4656 cvg_8.8_tip_0  | 1.17E-35    | 4656 | 589  | 325074608 |
| 1 | 73784 length 4667 cvg_7.7_tip_1  | 2.20E-50    | 4667 | 1551 | 326679416 |
| 1 | 73786 length 6171 cvg_8.0_tip_1  | 2.12E-40    | 6171 | 724  | 115757056 |
| 1 | 73788 length 6642 cvg_7.2_tip_1  | 1.06E-53    | 6642 | 911  | 189442218 |
| 1 | 73792 length 7284 cvg_11.3_tip_1 | 7.05E-59    | 7284 | 1551 | 326679416 |
