# Supplementary material for: Genome Analysis of the Domestic Dog (Korean Jindo) by Massively Parallel Sequencing
Source: PubMed Central journal article supplement — DNA Res. 2012 Apr 3;19(3):275–88. doi: 10.1093/dnares/dss011 (PMC3372376; doi:10.1093/dnares/dss011), 2012-04-03
Supplement: supp_dss011_dss011supp_table6.pdf [file supp_dss011_dss011supp_table6.pdf]

Supplementary Table 6. 42 contigs (derived from unmapped reads) were matched to the EST database but unmatched to the NR-nucleotide database

| rank | contig_id                        | pscore      | query_length | target_length | target_accession |
|------|----------------------------------|-------------|--------------|---------------|------------------|
| 1    | 53546 length 301 cvg_6.0_tip_1   | 2.86E-24    | 301          | 609           | 84588596         |
| 1    | 53766 length 304 cvg_6.0_tip_1   | 8.91E-77    | 304          | 653           | 18817627         |
| 1    | 53830 length 304 cvg_5.0_tip_1   | 2.30745E-06 | 304          | 651           | 112589012        |
| 1    | 53974 length 306 cvg_6.0_tip_1   | 1.42E-149   | 306          | 596           | 50529253         |
| 1    | 54826 length 316 cvg_8.6_tip_1   | 5.08E-29    | 316          | 551           | 50449893         |
| 1    | 55664 length 326 cvg_4.0_tip_1   | 8.02E-99    | 326          | 443           | 50440720         |
| 1    | 55674 length 326 cvg_7.3_tip_1   | 3.39E-67    | 326          | 551           | 50449893         |
| 1    | 56050 length 330 cvg_7.0_tip_1   | 9.95762E-06 | 330          | 557           | 50528320         |
| 1    | 56702 length 340 cvg_7.0_tip_1   | 2.32E-179   | 340          | 561           | 50526540         |
| 1    | 58026 length 359 cvg_7.0_tip_1   | 1.81E-118   | 359          | 641           | 60541493         |
| 1    | 59870 length 389 cvg_8.0_tip_1   | 6.64E-69    | 389          | 609           | 84588596         |
| 1    | 59878 length 389 cvg_5.0_tip_1   | 8.51E-16    | 389          | 863           | 84586154         |
| 1    | 60164 length 394 cvg_6.0_tip_1   | 1.54E-134   | 394          | 569           | 60585400         |
| 1    | 60562 length 401 cvg_10.0_tip_1  | 1.86E-38    | 401          | 582           | 50449823         |
| 1    | 60650 length 403 cvg_4.0_tip_1   | 7.89021E-07 | 403          | 658           | 18823537         |
| 1    | 61634 length 422 cvg_7.5_tip_1   | 1.41E-48    | 422          | 768           | 84584849         |
| 1    | 63244 length 459 cvg_7.0_tip_1   | 1.66E-54    | 459          | 263           | 84589393         |
| 1    | 63536 length 467 cvg_6.0_tip_1   | 2.30E-115   | 467          | 923           | 84589511         |
| 1    | 64908 length 507 cvg_9.0_tip_1   | 0           | 507          | 664           | 60563913         |
| 1    | 65602 length 528 cvg_4.0_tip_1   | 1.01E-40    | 528          | 501           | 15911712         |
| 1    | 65648 length 530 cvg_7.6_tip_1   | 2.59E-78    | 530          | 609           | 84588596         |
| 1    | 65718 length 533 cvg_4.0_tip_1   | 1.47E-178   | 533          | 329           | 60582512         |
| 1    | 66232 length 550 cvg_10.0_tip_1  | 9.88E-72    | 550          | 840           | 84588081         |
| 1    | 66268 length 551 cvg_9.6_tip_1   | 7.21E-156   | 551          | 618           | 50532189         |
| 1    | 66792 length 573 cvg_7.7_tip_1   | 1.02E-34    | 573          | 653           | 18817627         |
| 1    | 67146 length 588 cvg_7.0_tip_1   | 3.85E-28    | 588          | 609           | 84588596         |
| 1    | 68202 length 639 cvg_9.4_tip_0   | 1.75E-104   | 639          | 551           | 50449893         |
| 1    | 68702 length 672 cvg_4.0_tip_1   | 0           | 672          | 860           | 84588879         |
| 1    | 68814 length 680 cvg_10.0_tip_1  | 9.38134E-14 | 680          | 406           | 60527815         |
| 1    | 69100 length 698 cvg_6.1_tip_1   | 7.46E-30    | 698          | 609           | 84588596         |
| 1    | 69258 length 708 cvg_5.0_tip_1   | 0           | 708          | 673           | 60539614         |
| 1    | 69624 length 737 cvg_9.0_tip_1   | 5.17E-142   | 737          | 277           | 60635979         |
| 1    | 69972 length 764 cvg_10.6_tip_1  | 6.33E-46    | 764          | 443           | 50440720         |
| 1    | 70632 length 841 cvg_7.0_tip_1   | 2.89E-85    | 841          | 620           | 84589119         |
| 1    | 70970 length 890 cvg_7.0_tip_1   | 6.72E-111   | 890          | 412           | 62146151         |
| 1    | 71804 length 1022 cvg_9.0_tip_1  | 9.56E-55    | 1022         | 565           | 50441438         |
| 1    | 72338 length 1155 cvg_9.0_tip_1  | 3.93939E-11 | 1155         | 609           | 84588596         |
| 1    | 72362 length 1162 cvg_7.9_tip_1  | 2.46E-46    | 1162         | 412           | 62146151         |
| 1    | 72408 length 1174 cvg_67.7_tip_0 | 1.43E-75    | 1174         | 900           | 84586140         |
| 1    | 72662 length 1257 cvg_9.0_tip_1  | 2.05E-25    | 1257         | 181           | 60636521         |
| 1    | 73018 length 1456 cvg_55.3_tip_0 | 4.66E-42    | 1456         | 620           | 84589119         |
| 1    | 73228 length 1613 cvg_7.4_tip_1  | 2.36E-16    | 1613         | 609           | 84588596         |
