# Supplementary material for: Genome Analysis of the Domestic Dog (Korean Jindo) by Massively Parallel Sequencing
Source: PubMed Central journal article supplement — DNA Res. 2012 Apr 3;19(3):275–88. doi: 10.1093/dnares/dss011 (PMC3372376; doi:10.1093/dnares/dss011), 2012-04-03
Supplement: supp_dss011_dss011supp_table7.pdf [file supp_dss011_dss011supp_table7.pdf]

Supplementary Table 7. 700 scaffolds (derived from unmapped reads) were matched to the NR-protein database

| rank | scaffold_id | pscore | query_length | target_length | target_accession |           |
|------|-------------|--------|--------------|---------------|------------------|-----------|
| 1    | C60550      | 3.0    | 2.33216E-14  | 401           | 1356             | 45478104  |
| 1    | C66954      | 9.0    | 2.76586E-09  | 579           | 1260             | 126296    |
| 1    | C68292      | 6.0    | 1.67915E-12  | 644           | 809              | 21411215  |
| 1    | C60584      | 6.0    | 2.38519E-07  | 401           | 1272             | 66734174  |
| 1    | C65484      | 8.0    | 1.1565E-11   | 525           | 1079             | 74006100  |
| 1    | C59162      | 7.0    | 1.76E-26     | 378           | 227              | 283096349 |
| 1    | C62614      | 6.0    | 2.47E-20     | 443           | 723              | 291407239 |
| 1    | C56470      | 10.0   | 5.57E-25     | 336           | 468              | 17066524  |
| 1    | scaffold68  | 6.5    | 9.68141E-10  | 830           | 1339             | 73946349  |
| 1    | C60580      | 8.0    | 4.12E-19     | 401           | 416              | 74011368  |
| 1    | C66760      | 5.0    | 6.12786E-12  | 572           | 1159             | 74003681  |
| 1    | C72160      | 9.0    | 5.35E-29     | 1104          | 135              | 326934106 |
| 1    | C73696      | 9.0    | 1.81939E-13  | 2880          | 700              | 270013850 |
| 1    | scaffold234 | 7.0    | 2.97803E-07  | 1213          | 562              | 364964    |
| 1    | C66742      | 4.0    | 1.46E-16     | 571           | 1031             | 73979343  |
| 1    | C67648      | 9.0    | 6.86951E-10  | 611           | 472              | 301764723 |
| 1    | C71462      | 5.0    | 5.4735E-08   | 958           | 491              | 327268317 |
| 1    | C69170      | 8.0    | 6.02E-30     | 702           | 609              | 73964634  |
| 1    | C67882      | 6.0    | 1.30482E-11  | 621           | 473              | 242020244 |
| 1    | C71848      | 5.0    | 2.82E-21     | 1028          | 344              | 123270417 |
| 1    | C63292      | 5.0    | 5.56098E-09  | 460           | 123              | 296315065 |
| 1    | C56096      | 5.0    | 2.51998E-09  | 331           | 2519             | 311276164 |
| 1    | C61238      | 4.0    | 6.59682E-10  | 413           | 1846             | 47220139  |
| 1    | C61556      | 5.0    | 2.72E-27     | 420           | 2552             | 224458400 |
| 1    | C67412      | 5.0    | 1.10E-53     | 599           | 2552             | 224458400 |
| 1    | C71638      | 5.0    | 4.8545E-15   | 992           | 2571             | 326913484 |
| 1    | C71996      | 5.0    | 8.14E-71     | 1063          | 1272             | 66734174  |
| 1    | C64606      | 8.0    | 1.07E-52     | 498           | 972              | 74010171  |
| 1    | C66028      | 8.0    | 2.08E-69     | 543           | 261              | 294774368 |
| 1    | C60972      | 9.0    | 9.06E-19     | 409           | 261              | 189493093 |
| 1    | C63756      | 10.0   | 2.06E-27     | 473           | 104              | 320118989 |
| 1    | C69212      | 11.0   | 4.09E-32     | 705           | 226              | 262399669 |
| 1    | C69294      | 9.0    | 8.38E-30     | 710           | 226              | 262399669 |
| 1    | C56190      | 4.0    | 2.68222E-11  | 333           | 227              | 294774435 |
| 1    | C57208      | 5.0    | 1.18E-18     | 347           | 459              | 15079212  |
| 1    | C62382      | 4.0    | 6.99E-20     | 438           | 118              | 148292222 |
| 1    | C70990      | 9.0    | 6.34E-69     | 892           | 230              | 254028457 |
| 1    | C54000      | 8.0    | 2.78052E-08  | 306           | 654              | 73984574  |
| 1    | C67318      | 5.0    | 7.99E-35     | 596           | 484              | 21622589  |
| 1    | C56578      | 8.0    | 1.41685E-12  | 338           | 3404             | 83317874  |
| 1    | C59442      | 9.0    | 1.34E-18     | 382           | 3404             | 83317874  |
| 1    | C65082      | 6.0    | 1.42311E-10  | 512           | 3404             | 83317874  |
| 1    | C73208      | 7.0    | 2.05E-33     | 1591          | 717              | 325085610 |
| 1    | C73284      | 7.0    | 1.11251E-08  | 1692          | 3404             | 83317874  |
| 1    | C73768      | 7.0    | 2.50E-21     | 4188          | 3404             | 83317874  |

|   |             |      |             |      |      |           |
|---|-------------|------|-------------|------|------|-----------|
| 1 | C57488      | 6.0  | 7.67704E-06 | 351  | 301  | 73991115  |
| 1 | C70040      | 8.0  | 4.36447E-09 | 772  | 712  | 73966616  |
| 1 | C64476      | 7.0  | 1.93479E-09 | 494  | 654  | 73984574  |
| 1 | scaffold26  | 4.0  | 3.40343E-06 | 456  | 654  | 73984574  |
| 1 | C66800      | 5.0  | 2.32858E-11 | 573  | 183  | 297250762 |
| 1 | C61314      | 49.0 | 1.36918E-15 | 415  | 774  | 73945978  |
| 1 | C61790      | 7.0  | 1.39722E-07 | 425  | 754  | 73988965  |
| 1 | scaffold167 | 7.1  | 9.90E-32    | 596  | 1275 | 73981671  |
| 1 | C67946      | 5.0  | 1.39563E-12 | 624  | 314  | 281348240 |
| 1 | scaffold233 | 6.5  | 2.1717E-07  | 844  | 1272 | 148645276 |
| 1 | C72682      | 44.0 | 3.49291E-06 | 1261 | 607  | 194207280 |
| 1 | C72898      | 7.0  | 7.16E-24    | 1381 | 3404 | 83317874  |
| 1 | C61680      | 4.0  | 8.21E-16    | 423  | 489  | 50979184  |
| 1 | C66066      | 6.0  | 1.35336E-15 | 544  | 489  | 50979184  |
| 1 | C55326      | 7.0  | 6.27715E-08 | 321  | 166  | 345543    |
| 1 | C61334      | 6.0  | 9.52579E-09 | 415  | 38   | 297302964 |
| 1 | C54848      | 6.0  | 1.23577E-08 | 316  | 166  | 345543    |
| 1 | C62432      | 4.0  | 1.71E-34    | 439  | 318  | 189492219 |
| 1 | C66988      | 7.0  | 6.56E-65    | 581  | 318  | 148298632 |
| 1 | scaffold185 | 8.4  | 4.28332E-06 | 598  | 264  | 73962846  |
| 1 | C67638      | 10.0 | 5.59052E-10 | 610  | 166  | 345543    |
| 1 | C58590      | 8.0  | 2.31E-39    | 368  | 379  | 262399704 |
| 1 | C59326      | 5.0  | 7.16E-34    | 381  | 125  | 12622083  |
| 1 | C61944      | 9.0  | 2.58E-62    | 428  | 379  | 254028466 |
| 1 | C64022      | 7.0  | 1.18E-29    | 480  | 1402 | 74011366  |
| 1 | C54300      | 6.0  | 2.42E-20    | 309  | 606  | 255761436 |
| 1 | C60206      | 5.0  | 8.79E-26    | 395  | 261  | 189493093 |
| 1 | C57260      | 12.0 | 3.16E-34    | 348  | 459  | 115494575 |
| 1 | C62532      | 9.0  | 8.53E-26    | 441  | 288  | 118136415 |
| 1 | C68302      | 12.0 | 1.90E-40    | 644  | 347  | 90110749  |
| 1 | C71534      | 8.0  | 6.53E-17    | 970  | 3404 | 83317874  |
| 1 | C71784      | 8.0  | 9.58658E-14 | 1019 | 3404 | 83317874  |
| 1 | C71928      | 5.0  | 4.31E-25    | 1048 | 589  | 325074608 |
| 1 | C53968      | 9.0  | 1.61E-32    | 306  | 459  | 207559990 |
| 1 | C68562      | 16.0 | 5.32E-50    | 662  | 852  | 114595784 |
| 1 | C55260      | 5.0  | 4.47E-38    | 320  | 1275 | 2981631   |
| 1 | C59564      | 6.0  | 1.17E-18    | 385  | 321  | 74008335  |
| 1 | C53724      | 4.0  | 1.53131E-06 | 303  | 455  | 301783067 |
| 1 | C53994      | 6.0  | 9.52154E-09 | 306  | 812  | 74007908  |
| 1 | C59680      | 5.0  | 2.60359E-06 | 386  | 942  | 194211262 |
| 1 | C65848      | 6.0  | 2.46946E-06 | 537  | 1377 | 74007490  |
| 1 | C66990      | 5.0  | 6.89593E-06 | 581  | 718  | 74007494  |
| 1 | C73272      | 6.0  | 4.31E-21    | 1679 | 3404 | 83317874  |
| 1 | C73306      | 8.0  | 3.30E-32    | 1723 | 717  | 325085610 |
| 1 | C73570      | 6.0  | 6.49E-31    | 2229 | 717  | 325085610 |
| 1 | C68646      | 6.0  | 1.03095E-07 | 668  | 77   | 149031306 |
| 1 | C69096      | 5.0  | 1.60204E-09 | 698  | 1545 | 164665416 |
| 1 | C70026      | 6.0  | 6.8944E-15  | 770  | 452  | 311276323 |

|   |        |      |             |      |      |           |
|---|--------|------|-------------|------|------|-----------|
| 1 | C53324 | 6.0  | 1.06433E-07 | 300  | 957  | 73999407  |
| 1 | C62182 | 7.0  | 1.33318E-10 | 433  | 3404 | 83317874  |
| 1 | C66378 | 9.0  | 1.66989E-11 | 556  | 927  | 301755430 |
| 1 | C54438 | 7.0  | 9.201E-12   | 310  | 1208 | 74008436  |
| 1 | C54628 | 4.0  | 3.05172E-07 | 312  | 295  | 301774871 |
| 1 | C57312 | 6.0  | 1.55282E-06 | 348  | 1402 | 73951376  |
| 1 | C57674 | 8.0  | 1.08E-34    | 353  | 1272 | 73974662  |
| 1 | C58430 | 3.0  | 5.55E-25    | 365  | 1272 | 73974662  |
| 1 | C59026 | 8.0  | 1.65E-16    | 376  | 1208 | 74008436  |
| 1 | C59662 | 7.0  | 3.84E-39    | 386  | 1402 | 74011366  |
| 1 | C60610 | 6.0  | 1.4879E-09  | 402  | 1272 | 73974662  |
| 1 | C61958 | 6.0  | 1.15E-22    | 428  | 1402 | 73951376  |
| 1 | C63508 | 8.0  | 2.75E-39    | 466  | 1344 | 73971897  |
| 1 | C64086 | 3.0  | 5.94083E-11 | 482  | 1208 | 74008436  |
| 1 | C65476 | 7.0  | 2.81E-50    | 525  | 1402 | 74011366  |
| 1 | C66592 | 53.0 | 1.51E-57    | 564  | 1344 | 73999461  |
| 1 | C67284 | 11.0 | 5.60765E-14 | 595  | 1275 | 74008029  |
| 1 | C68340 | 7.0  | 7.88E-18    | 647  | 1196 | 74007944  |
| 1 | C68620 | 32.0 | 1.30E-34    | 666  | 1275 | 2981631   |
| 1 | C69396 | 7.0  | 2.12E-44    | 719  | 1025 | 74007488  |
| 1 | C70044 | 7.0  | 9.9786E-06  | 772  | 929  | 73994669  |
| 1 | C70184 | 59.0 | 1.19E-26    | 785  | 1384 | 73964662  |
| 1 | C55218 | 5.0  | 1.35636E-10 | 320  | 1425 | 46399087  |
| 1 | C58298 | 4.0  | 1.86489E-14 | 363  | 1425 | 46399087  |
| 1 | C62914 | 5.0  | 9.31E-20    | 450  | 1425 | 46399087  |
| 1 | C63006 | 7.0  | 3.30E-17    | 452  | 1327 | 53771848  |
| 1 | C57640 | 5.0  | 3.91856E-10 | 353  | 1327 | 53771848  |
| 1 | C66920 | 6.0  | 5.92992E-10 | 578  | 1327 | 53771848  |
| 1 | C67238 | 5.0  | 9.56521E-14 | 592  | 1413 | 297709805 |
| 1 | C69002 | 4.0  | 1.85E-26    | 692  | 1424 | 33859492  |
| 1 | C68152 | 15.0 | 5.0909E-14  | 637  | 514  | 50979244  |
| 1 | C69962 | 6.0  | 3.96E-31    | 764  | 3404 | 83317874  |
| 1 | C71626 | 8.0  | 3.03177E-09 | 990  | 712  | 73966616  |
| 1 | C71728 | 6.0  | 7.99379E-13 | 1009 | 3404 | 83317874  |
| 1 | C72436 | 7.0  | 5.71E-32    | 1179 | 717  | 325085610 |
| 1 | C72630 | 7.0  | 3.41E-22    | 1247 | 589  | 325074608 |
| 1 | C73182 | 7.0  | 6.86E-26    | 1559 | 717  | 325085610 |
| 1 | C73242 | 7.0  | 2.12928E-09 | 1630 | 3404 | 83317874  |
| 1 | C73292 | 8.0  | 1.04E-30    | 1704 | 3404 | 83317874  |
| 1 | C73694 | 8.0  | 5.26E-36    | 2866 | 717  | 325085610 |
| 1 | C63218 | 9.0  | 1.51754E-14 | 458  | 347  | 75072732  |
| 1 | C72820 | 10.0 | 2.17E-107   | 1339 | 609  | 51339372  |
| 1 | C70448 | 9.0  | 7.88E-76    | 814  | 175  | 108561428 |
| 1 | C68696 | 9.0  | 7.96E-16    | 671  | 347  | 108561418 |
| 1 | C65306 | 8.0  | 2.01E-28    | 519  | 227  | 288898378 |
| 1 | C69356 | 5.0  | 2.60E-26    | 717  | 227  | 5921853   |
| 1 | C59574 | 7.0  | 1.51E-26    | 385  | 346  | 262188100 |
| 1 | C56078 | 6.0  | 1.38276E-07 | 331  | 3404 | 83317874  |

|   |             |      |             |      |      |           |
|---|-------------|------|-------------|------|------|-----------|
| 1 | C68816      | 5.0  | 1.4044E-15  | 680  | 3404 | 83317874  |
| 1 | C58846      | 4.0  | 8.25589E-08 | 372  | 1402 | 74011366  |
| 1 | C71974      | 49.0 | 4.07E-19    | 1060 | 1272 | 148645276 |
| 1 | C64902      | 10.0 | 2.33E-31    | 507  | 514  | 326536079 |
| 1 | C72696      | 5.0  | 1.86835E-07 | 1271 | 143  | 284079    |
| 1 | C71734      | 9.0  | 9.85846E-09 | 1009 | 68   | 119599122 |
| 1 | C60352      | 8.0  | 1.43956E-09 | 397  | 1402 | 73951376  |
| 1 | C62016      | 7.0  | 7.63E-26    | 430  | 118  | 148292222 |
| 1 | scaffold143 | 10.0 | 6.30E-31    | 577  | 132  | 2826657   |
| 1 | C62066      | 9.0  | 5.51E-81    | 431  | 277  | 310756654 |
| 1 | C57518      | 7.0  | 1.54687E-06 | 351  | 142  | 260782220 |
| 1 | C62018      | 4.0  | 1.38549E-07 | 430  | 231  | 194687705 |
| 1 | C66650      | 6.0  | 2.84581E-06 | 566  | 231  | 194687705 |
| 1 | C73234      | 5.0  | 1.68289E-06 | 1624 | 390  | 4098582   |
| 1 | C73380      | 10.0 | 1.65E-37    | 1833 | 1272 | 66734174  |
| 1 | C68486      | 6.0  | 3.28E-17    | 656  | 1272 | 148645276 |
| 1 | C73614      | 9.0  | 4.40E-53    | 2369 | 847  | 74008523  |
| 1 | C65104      | 6.0  | 4.62478E-14 | 513  | 183  | 297250762 |
| 1 | C63532      | 7.0  | 3.11286E-15 | 467  | 1272 | 66734174  |
| 1 | C55082      | 11.0 | 1.07E-23    | 318  | 1272 | 66734174  |
| 1 | C73042      | 6.0  | 8.36E-18    | 1474 | 3404 | 83317874  |
| 1 | C72734      | 5.0  | 1.12E-23    | 1288 | 1272 | 66734174  |
| 1 | C62126      | 8.0  | 8.95969E-15 | 432  | 1272 | 148645276 |
| 1 | C67452      | 5.0  | 4.63E-16    | 601  | 296  | 148645275 |
| 1 | C64504      | 6.0  | 5.6714E-13  | 494  | 957  | 73999407  |
| 1 | C58446      | 4.0  | 7.52951E-06 | 365  | 308  | 66734173  |
| 1 | C66358      | 9.0  | 1.58801E-06 | 555  | 308  | 66734173  |
| 1 | C71136      | 6.0  | 4.4797E-10  | 913  | 308  | 66734173  |
| 1 | C69372      | 8.0  | 4.53E-34    | 718  | 1272 | 148645276 |
| 1 | C65668      | 6.0  | 4.63061E-14 | 531  | 812  | 74007908  |
| 1 | C72294      | 10.0 | 2.46E-16    | 1141 | 754  | 73988965  |
| 1 | C73000      | 5.0  | 2.22059E-12 | 1444 | 1272 | 66734174  |
| 1 | C63658      | 11.0 | 5.24201E-12 | 470  | 812  | 74007908  |
| 1 | C71764      | 5.0  | 1.17E-26    | 1014 | 1275 | 2072972   |
| 1 | C55806      | 5.0  | 1.00144E-11 | 327  | 1346 | 74007229  |
| 1 | C72402      | 9.0  | 1.31892E-14 | 1172 | 1275 | 2072967   |
| 1 | C70960      | 6.0  | 3.79E-24    | 889  | 764  | 253769266 |
| 1 | C73660      | 10.0 | 1.30E-56    | 2585 | 1275 | 2120083   |
| 1 | C58860      | 9.0  | 3.23351E-15 | 373  | 128  | 119607362 |
| 1 | C55434      | 4.0  | 5.99175E-12 | 322  | 1272 | 66734174  |
| 1 | C66940      | 5.0  | 7.04E-25    | 579  | 1272 | 148645276 |
| 1 | C72164      | 7.0  | 4.72826E-09 | 1105 | 1275 | 2072967   |
| 1 | C60608      | 4.0  | 3.28E-21    | 402  | 1207 | 74007516  |
| 1 | C72380      | 5.0  | 8.60E-33    | 1164 | 1344 | 73971897  |
| 1 | C64810      | 10.0 | 2.57899E-06 | 504  | 290  | 115954328 |
| 1 | C56340      | 5.0  | 5.55E-30    | 334  | 180  | 297250696 |
| 1 | C66544      | 8.0  | 2.32E-32    | 563  | 1031 | 73979343  |
| 1 | C66662      | 5.0  | 8.41E-21    | 567  | 1402 | 74011366  |

|   |             |      |             |      |      |           |
|---|-------------|------|-------------|------|------|-----------|
| 1 | C55168      | 6.0  | 3.35325E-09 | 319  | 123  | 296315065 |
| 1 | C63024      | 5.0  | 1.35958E-12 | 453  | 123  | 296315065 |
| 1 | C65052      | 5.0  | 4.31E-20    | 511  | 1272 | 148645276 |
| 1 | C69744      | 7.0  | 4.62E-30    | 745  | 1031 | 73979343  |
| 1 | C64402      | 18.0 | 3.54217E-11 | 491  | 705  | 190576558 |
| 1 | C70486      | 5.0  | 2.23E-20    | 818  | 1274 | 73976474  |
| 1 | C59426      | 6.0  | 3.69E-16    | 382  | 1272 | 66734174  |
| 1 | C59966      | 8.0  | 1.62431E-06 | 391  | 437  | 301783049 |
| 1 | C57784      | 55.0 | 5.41E-22    | 355  | 562  | 183396383 |
| 1 | C57850      | 6.0  | 7.86516E-11 | 356  | 128  | 281354416 |
| 1 | C63078      | 6.0  | 5.06E-18    | 454  | 1272 | 148645276 |
| 1 | C70666      | 5.0  | 7.43E-24    | 846  | 1275 | 73973846  |
| 1 | C73416      | 9.0  | 2.89E-58    | 1901 | 1384 | 73964662  |
| 1 | C55732      | 4.0  | 1.59032E-11 | 326  | 1272 | 148645276 |
| 1 | C61076      | 5.0  | 5.74932E-13 | 411  | 492  | 74008936  |
| 1 | C62166      | 4.0  | 6.98545E-08 | 433  | 1259 | 225047    |
| 1 | C62244      | 6.0  | 3.74E-24    | 435  | 1207 | 74007516  |
| 1 | C57420      | 4.0  | 3.89258E-10 | 350  | 1339 | 73946349  |
| 1 | C59726      | 5.0  | 8.64716E-10 | 387  | 296  | 148645275 |
| 1 | C63580      | 4.0  | 1.40054E-07 | 468  | 296  | 148645275 |
| 1 | scaffold193 | 7.0  | 9.29E-20    | 573  | 1275 | 2981631   |
| 1 | C67160      | 10.0 | 1.41E-26    | 589  | 957  | 73999407  |
| 1 | C68614      | 4.0  | 1.45946E-14 | 665  | 308  | 66734173  |
| 1 | C73016      | 9.0  | 2.84E-17    | 1455 | 295  | 301774871 |
| 1 | C70190      | 9.0  | 9.10629E-12 | 786  | 754  | 73988965  |
| 1 | C62162      | 5.0  | 6.83115E-15 | 433  | 1275 | 73966507  |
| 1 | C63786      | 4.0  | 6.87341E-15 | 473  | 1272 | 148645276 |
| 1 | C64452      | 14.0 | 8.53112E-10 | 493  | 774  | 73945978  |
| 1 | C61642      | 6.0  | 6.72904E-10 | 422  | 1366 | 73996185  |
| 1 | C62010      | 8.0  | 5.83209E-14 | 429  | 718  | 74007494  |
| 1 | C65568      | 5.0  | 8.21E-20    | 527  | 718  | 74007494  |
| 1 | C67862      | 8.0  | 4.18845E-15 | 620  | 1275 | 2981631   |
| 1 | C62226      | 6.0  | 5.01287E-11 | 434  | 224  | 119589289 |
| 1 | C63238      | 4.0  | 3.53E-39    | 459  | 1273 | 73975969  |
| 1 | C57634      | 6.0  | 1.36554E-10 | 353  | 1384 | 73964662  |
| 1 | C56290      | 4.0  | 8.01337E-11 | 334  | 1402 | 74011366  |
| 1 | C69022      | 60.0 | 3.73E-19    | 693  | 1384 | 73964662  |
| 1 | C61282      | 5.0  | 5.7791E-06  | 414  | 61   | 296314328 |
| 1 | C61866      | 4.0  | 8.45703E-13 | 426  | 847  | 74008523  |
| 1 | C64358      | 8.0  | 1.39E-27    | 490  | 1275 | 73985407  |
| 1 | C64498      | 8.0  | 1.55E-33    | 494  | 183  | 297250762 |
| 1 | C70086      | 9.0  | 1.14E-50    | 775  | 1159 | 74003681  |
| 1 | C73108      | 9.0  | 3.88E-50    | 1518 | 1402 | 73951376  |
| 1 | C56466      | 6.0  | 7.17E-26    | 336  | 1338 | 73999443  |
| 1 | C62170      | 10.0 | 1.21E-19    | 433  | 1272 | 148645276 |
| 1 | C65358      | 8.0  | 1.26527E-08 | 521  | 950  | 73971725  |
| 1 | C65394      | 8.0  | 3.70E-41    | 523  | 1272 | 66734174  |
| 1 | C66580      | 9.0  | 3.45345E-06 | 564  | 97   | 51102308  |

|   |             |      |             |      |      |           |
|---|-------------|------|-------------|------|------|-----------|
| 1 | C71814      | 6.0  | 1.16E-19    | 1023 | 113  | 281350181 |
| 1 | C72342      | 11.0 | 1.68E-37    | 1155 | 1384 | 73964662  |
| 1 | C58124      | 6.0  | 3.19E-23    | 360  | 183  | 297250762 |
| 1 | C61994      | 5.0  | 1.2774E-13  | 429  | 123  | 296315065 |
| 1 | C73520      | 52.0 | 2.88E-140   | 2106 | 1280 | 106322    |
| 1 | C63634      | 4.0  | 2.26E-24    | 469  | 1275 | 73973846  |
| 1 | C64758      | 7.0  | 7.92E-48    | 503  | 1275 | 73973846  |
| 1 | C70880      | 5.0  | 4.3358E-06  | 875  | 1402 | 74011366  |
| 1 | C66530      | 4.0  | 2.22717E-07 | 562  | 492  | 74008936  |
| 1 | C72862      | 5.0  | 1.64E-37    | 1364 | 1272 | 66734174  |
| 1 | C60568      | 3.0  | 1.39833E-07 | 401  | 1272 | 148645276 |
| 1 | C59318      | 5.0  | 4.049E-07   | 380  | 722  | 73975967  |
| 1 | C61096      | 5.0  | 6.11E-17    | 411  | 1275 | 2981631   |
| 1 | C66316      | 9.0  | 6.88829E-10 | 554  | 1275 | 73973846  |
| 1 | C59626      | 4.0  | 4.72E-39    | 386  | 180  | 297250696 |
| 1 | C62480      | 4.0  | 1.38222E-15 | 440  | 418  | 74007231  |
| 1 | C58588      | 5.0  | 1.63E-25    | 368  | 1272 | 66734174  |
| 1 | scaffold270 | 8.0  | 4.17716E-13 | 1636 | 86   | 261381444 |
| 1 | C55854      | 6.0  | 1.03E-31    | 328  | 1272 | 66734174  |
| 1 | C63204      | 9.0  | 8.88E-23    | 458  | 730  | 74007942  |
| 1 | C62514      | 5.0  | 4.00E-44    | 441  | 1275 | 2981631   |
| 1 | C55630      | 5.0  | 4.91E-16    | 325  | 492  | 73973943  |
| 1 | C60880      | 6.0  | 1.68484E-14 | 407  | 1272 | 148645276 |
| 1 | C68306      | 8.0  | 1.25E-34    | 644  | 1275 | 74008029  |
| 1 | C68610      | 4.0  | 7.38E-41    | 665  | 1031 | 73979343  |
| 1 | C69226      | 6.0  | 1.36E-19    | 706  | 1377 | 74007490  |
| 1 | C73274      | 9.0  | 3.35E-100   | 1680 | 1344 | 73999461  |
| 1 | C56206      | 5.0  | 2.77E-24    | 333  | 764  | 253769266 |
| 1 | C60262      | 4.0  | 2.23E-37    | 395  | 1402 | 74011366  |
| 1 | C68740      | 6.0  | 1.24E-16    | 674  | 1275 | 2981631   |
| 1 | C69086      | 49.0 | 5.44996E-10 | 697  | 295  | 301774871 |
| 1 | C64214      | 6.0  | 5.65E-40    | 486  | 1275 | 73973846  |
| 1 | C64992      | 7.0  | 6.04003E-06 | 509  | 427  | 281351415 |
| 1 | scaffold236 | 8.0  | 2.95E-27    | 933  | 1344 | 73971897  |
| 1 | C55522      | 4.0  | 1.12425E-14 | 324  | 1272 | 148645276 |
| 1 | C67324      | 5.0  | 4.41E-19    | 596  | 1207 | 74007516  |
| 1 | C69668      | 9.0  | 1.17E-24    | 740  | 1272 | 66734174  |
| 1 | C70768      | 8.0  | 6.08E-29    | 859  | 1275 | 2072961   |
| 1 | scaffold196 | 8.0  | 1.00198E-10 | 1025 | 296  | 148645275 |
| 1 | C72902      | 60.0 | 8.15E-30    | 1382 | 1272 | 148645276 |
| 1 | C70776      | 10.0 | 5.51E-22    | 860  | 524  | 296235005 |
| 1 | C56428      | 4.0  | 5.23467E-07 | 336  | 1275 | 73966507  |
| 1 | C72212      | 10.0 | 1.10183E-13 | 1117 | 1275 | 74007557  |
| 1 | C70164      | 8.0  | 2.80115E-12 | 784  | 1272 | 66734174  |
| 1 | C57368      | 8.0  | 1.51E-22    | 349  | 1272 | 148645276 |
| 1 | C63492      | 6.0  | 2.23E-29    | 466  | 1272 | 148645276 |
| 1 | C65202      | 5.0  | 1.85E-24    | 516  | 1272 | 148645276 |
| 1 | C69036      | 9.0  | 2.12104E-06 | 694  | 1300 | 209553980 |

|   |        |      |             |      |      |           |
|---|--------|------|-------------|------|------|-----------|
| 1 | C59486 | 5.0  | 2.13E-16    | 383  | 118  | 296315057 |
| 1 | C58902 | 6.0  | 1.96E-26    | 373  | 1275 | 73966507  |
| 1 | C60602 | 7.0  | 2.88E-45    | 402  | 1363 | 74002870  |
| 1 | C57698 | 6.0  | 6.25608E-08 | 354  | 1025 | 74007488  |
| 1 | C73162 | 11.0 | 7.05E-31    | 1546 | 1275 | 74008029  |
| 1 | C55466 | 37.0 | 1.2648E-08  | 323  | 894  | 47226214  |
| 1 | C56996 | 4.0  | 3.03506E-10 | 344  | 776  | 92110047  |
| 1 | C57158 | 4.0  | 1.03916E-10 | 346  | 776  | 92110047  |
| 1 | C58304 | 55.0 | 4.57527E-11 | 363  | 776  | 92110047  |
| 1 | C62812 | 4.0  | 1.65361E-08 | 447  | 897  | 327289093 |
| 1 | C63250 | 55.0 | 7.99E-24    | 459  | 776  | 92110047  |
| 1 | C63802 | 58.0 | 1.87181E-12 | 474  | 876  | 170583274 |
| 1 | C65112 | 60.0 | 1.20474E-09 | 513  | 776  | 92110047  |
| 1 | C66078 | 5.0  | 6.73225E-07 | 545  | 776  | 92110047  |
| 1 | C68032 | 58.0 | 3.21629E-13 | 630  | 558  | 297710917 |
| 1 | C72200 | 61.0 | 9.72E-27    | 1114 | 776  | 92110047  |
| 1 | C73640 | 53.0 | 1.04638E-08 | 2504 | 776  | 92110047  |
| 1 | C69740 | 6.0  | 8.16E-31    | 745  | 708  | 226437753 |
| 1 | C71600 | 6.0  | 7.37E-16    | 982  | 660  | 227937255 |
| 1 | C56972 | 3.0  | 1.31E-21    | 344  | 96   | 281350370 |
| 1 | C67128 | 5.0  | 1.63E-26    | 588  | 1273 | 73975969  |
| 1 | C72484 | 5.0  | 8.63E-21    | 1198 | 1402 | 73951376  |
| 1 | C72700 | 9.0  | 9.39E-30    | 1272 | 1274 | 73976474  |
| 1 | C73126 | 11.0 | 2.95E-76    | 1527 | 1196 | 74007944  |
| 1 | C55350 | 7.0  | 2.34E-29    | 321  | 1402 | 73951376  |
| 1 | C56598 | 4.0  | 9.58E-26    | 338  | 192  | 297250927 |
| 1 | C56680 | 5.0  | 3.01E-27    | 339  | 1159 | 74003681  |
| 1 | C57102 | 7.0  | 4.88E-16    | 345  | 1275 | 73966507  |
| 1 | C57730 | 6.0  | 5.97216E-12 | 354  | 1240 | 73981667  |
| 1 | C59154 | 6.0  | 4.05E-20    | 378  | 102  | 281338154 |
| 1 | C60674 | 16.0 | 3.21967E-14 | 403  | 957  | 73999407  |
| 1 | C62110 | 8.0  | 4.15E-20    | 432  | 1339 | 73946349  |
| 1 | C62522 | 6.0  | 3.23E-33    | 441  | 1272 | 66734174  |
| 1 | C63424 | 4.0  | 2.93E-16    | 464  | 1207 | 74007516  |
| 1 | C63794 | 4.0  | 1.29E-16    | 474  | 1338 | 73999443  |
| 1 | C64380 | 6.0  | 1.23353E-06 | 490  | 929  | 73994669  |
| 1 | C65132 | 5.0  | 1.15E-31    | 514  | 1366 | 73996185  |
| 1 | C65246 | 6.0  | 4.36651E-07 | 517  | 194  | 98989852  |
| 1 | C65584 | 6.0  | 3.99E-26    | 528  | 1272 | 148645276 |
| 1 | C65868 | 8.0  | 4.13E-43    | 538  | 1272 | 66734174  |
| 1 | C66718 | 6.0  | 2.71021E-12 | 570  | 764  | 253769266 |
| 1 | C66828 | 7.0  | 4.24E-44    | 574  | 1273 | 73975969  |
| 1 | C66842 | 8.0  | 9.24E-61    | 574  | 1338 | 73999443  |
| 1 | C66942 | 10.0 | 3.05127E-13 | 579  | 957  | 73999407  |
| 1 | C67096 | 8.0  | 3.31E-36    | 586  | 1079 | 74006100  |
| 1 | C67218 | 7.0  | 2.03268E-08 | 592  | 1338 | 73999443  |
| 1 | C67546 | 8.0  | 1.43E-20    | 605  | 1196 | 74007944  |
| 1 | C67650 | 11.0 | 3.42869E-07 | 611  | 1272 | 148645276 |

|   |             |      |             |      |      |           |
|---|-------------|------|-------------|------|------|-----------|
| 1 | scaffold168 | 9.4  | 5.50138E-10 | 626  | 1339 | 73946349  |
| 1 | C68250      | 4.0  | 1.16E-29    | 642  | 1272 | 148645276 |
| 1 | C68304      | 13.0 | 3.93941E-08 | 644  | 308  | 66734173  |
| 1 | C68500      | 9.0  | 4.35E-25    | 657  | 1275 | 2981631   |
| 1 | C68856      | 8.0  | 3.06E-18    | 683  | 1272 | 148645276 |
| 1 | C68890      | 8.0  | 8.22E-60    | 685  | 1208 | 74008436  |
| 1 | scaffold200 | 7.8  | 1.11E-16    | 712  | 1402 | 73951376  |
| 1 | C69318      | 6.0  | 9.42942E-13 | 713  | 1275 | 73973846  |
| 1 | C70244      | 6.0  | 6.15E-30    | 791  | 1344 | 73971897  |
| 1 | C71038      | 9.0  | 3.40E-33    | 900  | 1207 | 74007516  |
| 1 | C71066      | 9.0  | 6.28E-32    | 903  | 1272 | 148645276 |
| 1 | C71190      | 6.0  | 4.41E-16    | 921  | 127  | 281349743 |
| 1 | scaffold191 | 9.1  | 6.83E-51    | 966  | 1366 | 73996185  |
| 1 | C71608      | 10.0 | 1.27E-23    | 984  | 1402 | 74011366  |
| 1 | C72606      | 9.0  | 4.90581E-13 | 1241 | 1275 | 2072953   |
| 1 | C73298      | 46.0 | 2.39E-68    | 1713 | 1384 | 73964662  |
| 1 | C73436      | 10.0 | 9.23E-108   | 1940 | 1275 | 73973846  |
| 1 | C53372      | 5.0  | 1.13E-33    | 300  | 400  | 92110043  |
| 1 | C65342      | 7.0  | 3.41596E-09 | 521  | 1275 | 2072967   |
| 1 | C53888      | 4.0  | 2.34E-31    | 305  | 2519 | 311276164 |
| 1 | C67828      | 5.0  | 6.06111E-09 | 619  | 2571 | 326913484 |
| 1 | C69026      | 5.0  | 7.26E-23    | 694  | 225  | 57114083  |
| 1 | C64804      | 10.0 | 8.95E-23    | 504  | 313  | 285399861 |
| 1 | C60786      | 4.0  | 1.7504E-10  | 405  | 113  | 281352949 |
| 1 | C69616      | 5.0  | 3.47E-29    | 737  | 1639 | 74006718  |
| 1 | C70258      | 5.0  | 6.88315E-13 | 793  | 2519 | 311276164 |
| 1 | C69438      | 7.0  | 3.1132E-11  | 722  | 188  | 149032233 |
| 1 | C71340      | 9.0  | 4.57E-33    | 939  | 1275 | 2072977   |
| 1 | C58700      | 6.0  | 2.01581E-07 | 370  | 1272 | 148645276 |
| 1 | C61746      | 6.0  | 1.18008E-14 | 424  | 730  | 327488513 |
| 1 | C69346      | 6.0  | 1.18111E-11 | 716  | 254  | 34532236  |
| 1 | C72768      | 11.0 | 7.39E-28    | 1310 | 1272 | 66734174  |
| 1 | C63984      | 9.0  | 2.63922E-12 | 479  | 1259 | 225047    |
| 1 | scaffold181 | 8.3  | 1.11385E-09 | 876  | 1031 | 73979343  |
| 1 | C61452      | 5.0  | 2.60684E-06 | 417  | 1272 | 148645276 |
| 1 | C62644      | 7.0  | 2.65139E-06 | 444  | 254  | 34532236  |
| 1 | C65814      | 5.0  | 3.73628E-11 | 536  | 1402 | 74011366  |
| 1 | C71086      | 9.0  | 1.11281E-13 | 905  | 1384 | 73964662  |
| 1 | scaffold115 | 5.8  | 6.32785E-08 | 549  | 61   | 296314328 |
| 1 | C59238      | 4.0  | 2.09E-21    | 379  | 1272 | 148645276 |
| 1 | C59242      | 8.0  | 7.87E-19    | 379  | 1040 | 301603905 |
| 1 | C54340      | 5.0  | 2.57745E-14 | 309  | 128  | 115313021 |
| 1 | C63990      | 7.0  | 6.89676E-14 | 479  | 1275 | 17980447  |
| 1 | C65268      | 7.0  | 1.69487E-08 | 518  | 224  | 119589289 |
| 1 | C68132      | 5.0  | 2.00681E-14 | 635  | 1275 | 2072958   |
| 1 | C66282      | 5.0  | 7.73527E-06 | 552  | 1259 | 225047    |
| 1 | C53812      | 7.0  | 7.09672E-12 | 304  | 129  | 301761514 |
| 1 | C67768      | 9.0  | 1.08E-26    | 616  | 1275 | 2072977   |



|   |        |      |             |      |      |           |
|---|--------|------|-------------|------|------|-----------|
| 1 | C53436 | 10.0 | 2.76326E-06 | 301  | 419  | 149618125 |
| 1 | C72706 | 8.0  | 8.63279E-13 | 1274 | 754  | 73988965  |
| 1 | C54734 | 7.0  | 3.5916E-08  | 314  | 1272 | 148645276 |
| 1 | C61888 | 8.0  | 5.85668E-14 | 427  | 141  | 168066203 |
| 1 | C71382 | 8.0  | 1.72185E-06 | 947  | 775  | 311262055 |
| 1 | C61056 | 9.0  | 1.74E-26    | 410  | 160  | 119625410 |
| 1 | C73496 | 7.0  | 5.33372E-08 | 2042 | 1275 | 2981631   |
| 1 | C64092 | 6.0  | 1.04732E-10 | 482  | 764  | 253769266 |
| 1 | C71420 | 9.0  | 2.45E-16    | 952  | 1275 | 2072977   |
| 1 | C61550 | 4.0  | 3.16909E-08 | 420  | 1275 | 2072951   |
| 1 | C68988 | 9.0  | 7.98E-26    | 691  | 1300 | 209553980 |
| 1 | C67754 | 8.0  | 1.11218E-07 | 616  | 105  | 119606449 |
| 1 | C54156 | 5.0  | 1.68205E-06 | 308  | 180  | 297250696 |
| 1 | C56590 | 9.0  | 2.11E-24    | 338  | 4154 | 301774951 |
| 1 | C60494 | 5.0  | 5.33533E-07 | 399  | 955  | 149060124 |
| 1 | C60112 | 9.0  | 3.82065E-10 | 393  | 1182 | 7522108   |
| 1 | C60192 | 10.0 | 1.78E-18    | 394  | 833  | 297676074 |
| 1 | C71354 | 7.0  | 1.7844E-12  | 943  | 1275 | 74008029  |
| 1 | C63762 | 5.0  | 3.8178E-11  | 473  | 363  | 281338530 |
| 1 | C71308 | 8.0  | 1.18258E-13 | 935  | 1272 | 66734174  |
| 1 | C64026 | 5.0  | 3.4153E-06  | 480  | 1104 | 37361816  |
| 1 | C68932 | 6.0  | 1.37142E-11 | 687  | 562  | 183396383 |
| 1 | C67136 | 7.0  | 8.37E-41    | 588  | 224  | 119588287 |
| 1 | C55680 | 5.0  | 6.68155E-10 | 326  | 1272 | 148645276 |
| 1 | C72224 | 10.0 | 3.67E-25    | 1119 | 1054 | 296213519 |
| 1 | C71612 | 8.0  | 5.56237E-07 | 986  | 192  | 297250927 |
| 1 | C71232 | 9.0  | 7.55542E-08 | 925  | 957  | 73999407  |
| 1 | C71830 | 9.0  | 6.93891E-12 | 1026 | 1272 | 66734174  |
| 1 | C62916 | 9.0  | 1.03129E-10 | 450  | 157  | 1196431   |
| 1 | C56908 | 9.0  | 4.10674E-12 | 343  | 416  | 73978163  |
| 1 | C62754 | 6.0  | 2.64002E-06 | 446  | 1272 | 148645276 |
| 1 | C72518 | 9.0  | 2.20343E-10 | 1213 | 1421 | 296222541 |
| 1 | C69040 | 7.0  | 8.98327E-13 | 695  | 397  | 301784823 |
| 1 | C72084 | 9.0  | 1.79E-21    | 1084 | 1280 | 106322    |
| 1 | C67772 | 8.0  | 5.72567E-08 | 617  | 1272 | 66734174  |
| 1 | C62308 | 6.0  | 8.60468E-10 | 436  | 1275 | 73973846  |
| 1 | C68466 | 9.0  | 1.70275E-15 | 655  | 1260 | 126296    |
| 1 | C70340 | 9.0  | 9.10E-24    | 802  | 562  | 364964    |
| 1 | C58672 | 8.0  | 1.95E-33    | 369  | 1516 | 297285485 |
| 1 | C71374 | 9.0  | 6.97E-16    | 945  | 367  | 326921974 |
| 1 | C66490 | 8.0  | 9.65461E-07 | 560  | 1272 | 148645276 |
| 1 | C65542 | 7.0  | 7.91E-31    | 527  | 1275 | 2072977   |
| 1 | C65338 | 6.0  | 9.39805E-12 | 521  | 1280 | 106322    |
| 1 | C72182 | 9.0  | 4.29529E-10 | 1109 | 313  | 301761816 |
| 1 | C68906 | 11.0 | 7.75395E-13 | 686  | 1272 | 66734174  |
| 1 | C69670 | 9.0  | 4.05055E-13 | 740  | 1281 | 558908    |
| 1 | C68068 | 8.0  | 2.54093E-10 | 633  | 1272 | 148645276 |
| 1 | C62434 | 10.0 | 1.66E-29    | 439  | 1939 | 119596893 |

|   |        |      |             |      |      |           |
|---|--------|------|-------------|------|------|-----------|
| 1 | C67670 | 7.0  | 6.01799E-06 | 612  | 254  | 297299728 |
| 1 | C61352 | 7.0  | 4.38417E-11 | 416  | 180  | 297250696 |
| 1 | C71766 | 18.0 | 2.97206E-07 | 1015 | 123  | 149032404 |
| 1 | C56816 | 6.0  | 2.32E-23    | 341  | 1272 | 66734174  |
| 1 | C60638 | 6.0  | 2.24E-20    | 402  | 1280 | 106322    |
| 1 | C54752 | 4.0  | 9.01529E-14 | 314  | 762  | 194227826 |
| 1 | C68604 | 9.0  | 2.00E-26    | 664  | 1272 | 66734174  |
| 1 | C66978 | 10.0 | 2.03809E-10 | 580  | 1344 | 73999461  |
| 1 | C68346 | 9.0  | 9.28E-27    | 647  | 2753 | 297274934 |
| 1 | C59784 | 61.0 | 1.51E-22    | 388  | 1337 | 126344438 |
| 1 | C70582 | 9.0  | 1.10E-19    | 833  | 1260 | 126296    |
| 1 | C59746 | 6.0  | 8.94841E-07 | 387  | 159  | 148703677 |
| 1 | C71304 | 10.0 | 4.88527E-14 | 935  | 573  | 2197085   |
| 1 | C57588 | 5.0  | 1.95E-18    | 352  | 1272 | 148645276 |
| 1 | C71314 | 6.0  | 5.27574E-07 | 936  | 156  | 70939614  |
| 1 | C69664 | 58.0 | 1.3488E-14  | 740  | 1272 | 148645276 |
| 1 | C57408 | 7.0  | 2.38648E-07 | 350  | 562  | 183396383 |
| 1 | C73408 | 10.0 | 8.4371E-07  | 1888 | 904  | 73964664  |
| 1 | C60536 | 8.0  | 1.61143E-07 | 400  | 377  | 73971610  |
| 1 | C68422 | 7.0  | 2.95722E-06 | 651  | 123  | 296315065 |
| 1 | C68660 | 8.0  | 3.26138E-07 | 669  | 1300 | 1791243   |
| 1 | C61584 | 5.0  | 5.36E-22    | 421  | 1031 | 73979343  |
| 1 | C71294 | 10.0 | 7.69E-30    | 933  | 1057 | 92110051  |
| 1 | C71642 | 8.0  | 2.58005E-08 | 993  | 1275 | 2981631   |
| 1 | C73590 | 9.0  | 9.53619E-09 | 2310 | 1260 | 126296    |
| 1 | C57170 | 4.0  | 6.73562E-10 | 346  | 1327 | 53771848  |
| 1 | C61734 | 6.0  | 1.18779E-06 | 424  | 108  | 119608864 |
| 1 | C70720 | 9.0  | 1.05684E-09 | 851  | 367  | 804811    |
| 1 | C69720 | 5.0  | 1.03229E-12 | 743  | 1272 | 148645276 |
| 1 | C68348 | 5.0  | 8.54241E-07 | 647  | 1272 | 148645276 |
| 1 | C65400 | 9.0  | 6.23465E-09 | 523  | 1275 | 2981631   |
| 1 | C69562 | 11.0 | 7.1997E-11  | 733  | 385  | 62087934  |
| 1 | C56006 | 6.0  | 5.81791E-14 | 330  | 129  | 164430490 |
| 1 | C55714 | 9.0  | 9.32333E-12 | 326  | 763  | 291403264 |
| 1 | C55334 | 7.0  | 2.01929E-06 | 321  | 562  | 364964    |
| 1 | C61234 | 6.0  | 4.25421E-14 | 413  | 252  | 116283716 |
| 1 | C72292 | 8.0  | 6.91606E-11 | 1140 | 584  | 327272746 |
| 1 | C58748 | 5.0  | 3.88044E-06 | 371  | 119  | 281341662 |
| 1 | C64820 | 5.0  | 1.38138E-15 | 505  | 1275 | 2981631   |
| 1 | C67612 | 10.0 | 3.23E-36    | 609  | 243  | 119568404 |
| 1 | C66122 | 7.0  | 5.46375E-07 | 546  | 1272 | 148645276 |
| 1 | C58082 | 10.0 | 3.06457E-12 | 359  | 1272 | 66734174  |
| 1 | C55240 | 4.0  | 7.18E-20    | 320  | 454  | 2226004   |
| 1 | C57610 | 6.0  | 1.17E-22    | 353  | 591  | 114583892 |
| 1 | C62032 | 7.0  | 2.76E-21    | 430  | 454  | 2226004   |
| 1 | C70216 | 7.0  | 2.48436E-09 | 788  | 1272 | 73974662  |
| 1 | C71624 | 9.0  | 7.64E-17    | 990  | 664  | 73987678  |
| 1 | C53822 | 6.0  | 6.39531E-13 | 304  | 1272 | 66734174  |

|   |             |      |             |      |      |           |
|---|-------------|------|-------------|------|------|-----------|
| 1 | C63948      | 5.0  | 5.28E-28    | 478  | 1344 | 73999461  |
| 1 | C70622      | 5.0  | 8.50E-26    | 840  | 1272 | 66734174  |
| 1 | C68404      | 4.0  | 3.71267E-07 | 650  | 296  | 148645275 |
| 1 | C70508      | 9.0  | 4.68613E-09 | 822  | 419  | 149618125 |
| 1 | C56872      | 5.0  | 6.13671E-08 | 342  | 562  | 183396383 |
| 1 | C69882      | 8.0  | 1.06452E-13 | 757  | 1272 | 148645276 |
| 1 | C66134      | 10.0 | 3.34118E-06 | 546  | 1280 | 106322    |
| 1 | C65964      | 7.0  | 6.60024E-07 | 541  | 654  | 73984574  |
| 1 | C53610      | 7.0  | 9.73054E-11 | 302  | 126  | 281338506 |
| 1 | C70672      | 9.0  | 4.25788E-11 | 847  | 712  | 73966616  |
| 1 | C59528      | 5.0  | 6.85155E-07 | 384  | 1281 | 558908    |
| 1 | C70118      | 11.0 | 7.56771E-09 | 779  | 1275 | 92111133  |
| 1 | C71078      | 5.0  | 3.53248E-06 | 904  | 1272 | 148645276 |
| 1 | C69112      | 10.0 | 4.88E-18    | 699  | 183  | 297250762 |
| 1 | scaffold273 | 7.6  | 1.27E-24    | 1531 | 3404 | 83317874  |
| 1 | C54038      | 3.0  | 1.98536E-06 | 306  | 197  | 114555003 |
| 1 | C63330      | 7.0  | 1.5144E-06  | 461  | 299  | 297664742 |
| 1 | C63782      | 6.0  | 4.24147E-08 | 473  | 754  | 45478232  |
| 1 | C70616      | 6.0  | 4.62764E-08 | 839  | 957  | 73999407  |
| 1 | C70224      | 10.0 | 1.02E-16    | 789  | 1275 | 2072961   |
| 1 | C54082      | 5.0  | 4.02228E-10 | 307  | 225  | 125537847 |
| 1 | C65676      | 5.0  | 4.6048E-12  | 531  | 135  | 804809    |
| 1 | C71862      | 10.0 | 5.55257E-13 | 1032 | 1272 | 66734174  |
| 1 | C70354      | 6.0  | 1.09E-45    | 803  | 1272 | 66734174  |
| 1 | C60508      | 8.0  | 1.53366E-14 | 400  | 183  | 297250762 |
| 1 | C72988      | 5.0  | 7.08779E-14 | 1439 | 1503 | 62666798  |
| 1 | C73526      | 9.0  | 2.14556E-11 | 2127 | 1272 | 66734174  |
| 1 | C68554      | 5.0  | 1.0345E-07  | 661  | 88   | 281354217 |
| 1 | C72136      | 10.0 | 6.30635E-06 | 1099 | 821  | 307150584 |
| 1 | C70882      | 7.0  | 1.85521E-09 | 875  | 700  | 270013850 |
| 1 | C72080      | 8.0  | 2.5489E-09  | 1083 | 821  | 307150584 |
| 1 | C72844      | 6.0  | 6.75707E-11 | 1352 | 3404 | 83317874  |
| 1 | C53326      | 9.0  | 7.87496E-11 | 300  | 1716 | 301755346 |
| 1 | C65544      | 6.0  | 1.11E-16    | 527  | 1716 | 301755346 |
| 1 | C66168      | 6.0  | 3.63974E-08 | 548  | 1931 | 311115255 |
| 1 | C57282      | 8.0  | 6.09211E-11 | 348  | 466  | 291394337 |
| 1 | C71112      | 4.0  | 2.64E-17    | 909  | 2552 | 327268409 |
| 1 | C63468      | 9.0  | 6.30E-16    | 465  | 330  | 114582549 |
| 1 | C62140      | 6.0  | 1.6297E-08  | 432  | 491  | 327268317 |
| 1 | C65444      | 5.0  | 3.73817E-09 | 524  | 478  | 297493524 |
| 1 | C55938      | 6.0  | 4.14091E-09 | 329  | 492  | 73973943  |
| 1 | C53942      | 8.0  | 4.42889E-14 | 305  | 183  | 297250762 |
| 1 | C72392      | 8.0  | 2.14148E-07 | 1168 | 1272 | 148645276 |
| 1 | C63158      | 6.0  | 3.51384E-11 | 456  | 1716 | 301755346 |
| 1 | C63668      | 8.0  | 6.65892E-10 | 471  | 609  | 73964634  |
| 1 | C68710      | 8.0  | 2.5096E-09  | 672  | 305  | 301770281 |
| 1 | C57938      | 3.0  | 7.61803E-06 | 357  | 1344 | 73999461  |
| 1 | C62464      | 7.0  | 5.74705E-06 | 440  | 929  | 73994669  |

|   |             |      |             |      |      |           |
|---|-------------|------|-------------|------|------|-----------|
| 1 | C55716      | 5.0  | 3.66629E-08 | 326  | 184  | 268567568 |
| 1 | C69864      | 4.0  | 1.64947E-13 | 755  | 1084 | 297303308 |
| 1 | C53808      | 7.0  | 8.45E-16    | 304  | 183  | 297250762 |
| 1 | C68772      | 8.0  | 2.03266E-06 | 678  | 74   | 296314573 |
| 1 | C61130      | 24.0 | 7.72E-21    | 412  | 1079 | 74006100  |
| 1 | C64392      | 6.0  | 1.94366E-09 | 491  | 135  | 34526788  |
| 1 | C67298      | 6.0  | 1.02E-57    | 595  | 1275 | 73966507  |
| 1 | C72578      | 9.0  | 1.42E-47    | 1235 | 1385 | 73973206  |
| 1 | C64636      | 5.0  | 7.44516E-06 | 498  | 957  | 73999407  |
| 1 | C73196      | 6.0  | 3.76E-18    | 1577 | 1025 | 74007488  |
| 1 | C59462      | 5.0  | 1.71E-20    | 383  | 1402 | 73951376  |
| 1 | C61168      | 6.0  | 2.12666E-12 | 412  | 418  | 74007231  |
| 1 | C69138      | 9.0  | 1.19691E-09 | 700  | 1280 | 106322    |
| 1 | C67098      | 8.0  | 9.23E-30    | 586  | 436  | 74008932  |
| 1 | C65370      | 8.0  | 7.35315E-10 | 522  | 1079 | 74006100  |
| 1 | C67394      | 4.0  | 1.1431E-13  | 599  | 1275 | 73973846  |
| 1 | C72050      | 9.0  | 2.92E-16    | 1077 | 3404 | 83317874  |
| 1 | C61618      | 4.0  | 1.65E-32    | 421  | 606  | 167716875 |
| 1 | C65572      | 8.0  | 5.34E-46    | 528  | 609  | 51339397  |
| 1 | C72336      | 7.0  | 6.34E-121   | 1155 | 606  | 294774400 |
| 1 | C73194      | 8.0  | 5.17E-21    | 1577 | 183  | 297250762 |
| 1 | C66586      | 8.0  | 1.07E-31    | 564  | 436  | 74008932  |
| 1 | C62972      | 6.0  | 1.41939E-09 | 452  | 1272 | 148645276 |
| 1 | C67454      | 10.0 | 7.51538E-07 | 601  | 338  | 5052950   |
| 1 | C65010      | 7.0  | 3.06E-21    | 510  | 609  | 73964634  |
| 1 | C64540      | 5.0  | 2.9662E-07  | 495  | 1260 | 126296    |
| 1 | C63356      | 10.0 | 2.53708E-07 | 462  | 1272 | 66734174  |
| 1 | C66020      | 8.0  | 2.19E-18    | 542  | 1872 | 281349880 |
| 1 | C58406      | 6.0  | 1.79215E-07 | 365  | 705  | 190576558 |
| 1 | scaffold154 | 8.2  | 1.0403E-06  | 622  | 712  | 1335205   |
| 1 | C71520      | 9.0  | 2.65891E-10 | 967  | 847  | 74008523  |
| 1 | C71914      | 6.0  | 7.62E-26    | 1045 | 1272 | 66734174  |
| 1 | C72432      | 9.0  | 1.15E-16    | 1178 | 812  | 74007908  |
| 1 | C69524      | 7.0  | 4.81752E-14 | 729  | 1280 | 106322    |
| 1 | C73074      | 10.0 | 1.5089E-14  | 1495 | 601  | 281342915 |
| 1 | C68564      | 4.0  | 4.71E-37    | 662  | 1766 | 297493257 |
| 1 | C64406      | 11.0 | 3.91633E-10 | 491  | 382  | 296192078 |
| 1 | C63622      | 59.0 | 2.07E-17    | 469  | 1344 | 73999461  |
| 1 | C67384      | 5.0  | 3.92369E-15 | 598  | 1275 | 73973941  |
| 1 | C69408      | 9.0  | 7.52E-42    | 721  | 754  | 73988965  |
| 1 | C70402      | 5.0  | 3.21E-20    | 809  | 1272 | 148645276 |
| 1 | scaffold148 | 7.4  | 3.41E-17    | 905  | 1159 | 74003681  |
| 1 | C69342      | 8.0  | 7.78408E-07 | 716  | 705  | 190576558 |
| 1 | C66944      | 6.0  | 1.11E-31    | 579  | 1275 | 2072964   |
| 1 | C54466      | 5.0  | 1.98077E-08 | 311  | 296  | 148645275 |
| 1 | C54468      | 4.0  | 4.3238E-08  | 311  | 296  | 148645275 |
| 1 | C54512      | 5.0  | 4.0813E-14  | 311  | 1272 | 148645276 |
| 1 | C70028      | 8.0  | 3.08E-31    | 771  | 1272 | 148645276 |

|   |             |      |             |      |      |           |
|---|-------------|------|-------------|------|------|-----------|
| 1 | scaffold145 | 6.2  | 6.31097E-13 | 671  | 3404 | 83317874  |
| 1 | C64356      | 4.0  | 1.49E-18    | 490  | 1272 | 66734174  |
| 1 | C66996      | 6.0  | 1.13E-24    | 581  | 664  | 73987678  |
| 1 | C70384      | 5.0  | 9.90479E-15 | 806  | 1272 | 148645276 |
| 1 | C62160      | 7.0  | 3.39814E-06 | 433  | 1275 | 92111133  |
| 1 | C58312      | 3.0  | 2.1253E-08  | 363  | 1300 | 1791243   |
| 1 | C62708      | 4.0  | 1.54294E-07 | 445  | 1272 | 66734174  |
| 1 | C61590      | 4.0  | 1.71119E-13 | 421  | 827  | 311275908 |
| 1 | C56832      | 5.0  | 5.92328E-06 | 342  | 764  | 253769266 |
| 1 | C72310      | 9.0  | 3.70E-28    | 1148 | 1272 | 148645276 |
| 1 | C69818      | 5.0  | 6.9971E-07  | 751  | 1272 | 148645276 |
| 1 | C62006      | 5.0  | 5.62496E-07 | 429  | 1196 | 74007944  |
| 1 | C66858      | 6.0  | 9.22E-16    | 575  | 1272 | 148645276 |
| 1 | C69698      | 7.0  | 6.46583E-15 | 742  | 192  | 297250927 |
| 1 | C72780      | 5.0  | 7.30E-23    | 1315 | 1272 | 66734174  |
| 1 | C66734      | 7.0  | 4.46748E-07 | 571  | 1272 | 148645276 |
| 1 | scaffold217 | 5.1  | 1.0699E-09  | 857  | 377  | 126661643 |
| 1 | scaffold157 | 8.4  | 7.58606E-07 | 821  | 95   | 153878697 |
| 1 | C61440      | 5.0  | 5.00912E-10 | 417  | 316  | 167957114 |
| 1 | scaffold75  | 8.8  | 5.18E-50    | 2321 | 1275 | 2072977   |
| 1 | C61824      | 4.0  | 3.99281E-11 | 425  | 1384 | 73964662  |
| 1 | C72176      | 5.0  | 1.73249E-13 | 1107 | 296  | 148645275 |
| 1 | C73244      | 63.0 | 5.61744E-10 | 1631 | 776  | 92110047  |
| 1 | C56780      | 5.0  | 1.66E-21    | 341  | 2552 | 224458400 |
| 1 | C57266      | 5.0  | 2.6487E-06  | 348  | 2552 | 224458400 |
| 1 | C70912      | 5.0  | 6.56E-18    | 880  | 2552 | 224458400 |
| 1 | C72556      | 5.0  | 2.55347E-14 | 1227 | 2547 | 149744453 |
| 1 | C72626      | 9.0  | 5.30057E-14 | 1247 | 377  | 126661643 |
| 1 | C53930      | 4.0  | 3.55244E-07 | 305  | 180  | 297250696 |
| 1 | C53618      | 6.0  | 6.04924E-13 | 302  | 107  | 297270420 |
| 1 | C57402      | 4.0  | 7.09404E-08 | 350  | 1275 | 2072958   |
| 1 | C69920      | 5.0  | 1.04E-27    | 760  | 1280 | 106322    |
| 1 | C66330      | 5.0  | 3.06522E-10 | 554  | 1344 | 73971897  |
| 1 | C69914      | 6.0  | 3.15538E-06 | 759  | 96   | 281349076 |
| 1 | C69544      | 9.0  | 9.30E-19    | 731  | 213  | 281338557 |
| 1 | C55438      | 4.0  | 2.83312E-12 | 322  | 300  | 296198405 |
| 1 | C73374      | 11.0 | 4.48E-19    | 1827 | 213  | 149027158 |
| 1 | C55018      | 12.0 | 5.32E-31    | 317  | 4138 | 301772256 |
| 1 | C62368      | 9.0  | 1.11E-57    | 437  | 4138 | 301772256 |
| 1 | C61080      | 7.0  | 2.71E-16    | 411  | 103  | 301755352 |
| 1 | scaffold225 | 9.4  | 6.9104E-07  | 771  | 466  | 73961179  |
| 1 | scaffold121 | 8.0  | 6.03591E-07 | 575  | 235  | 301789295 |
| 1 | C59882      | 6.0  | 2.10E-40    | 389  | 592  | 301791431 |
| 1 | C66156      | 9.0  | 8.35E-35    | 547  | 309  | 73968303  |
| 1 | C70684      | 9.0  | 3.48E-21    | 847  | 2971 | 301775003 |
| 1 | C62500      | 8.0  | 1.36472E-15 | 440  | 1405 | 301767450 |
| 1 | C70598      | 8.0  | 6.59E-17    | 836  | 1405 | 301767450 |
| 1 | C60872      | 7.0  | 4.45125E-14 | 407  | 220  | 297273977 |

|   |             |      |             |      |      |           |
|---|-------------|------|-------------|------|------|-----------|
| 1 | C59922      | 7.0  | 1.54188E-08 | 390  | 232  | 297285351 |
| 1 | C73516      | 16.0 | 1.22544E-15 | 2096 | 362  | 71423181  |
| 1 | C59070      | 8.0  | 1.40E-23    | 376  | 705  | 297279341 |
| 1 | C66276      | 9.0  | 1.03E-42    | 552  | 6725 | 301773066 |
| 1 | C68262      | 5.0  | 1.35E-62    | 643  | 376  | 301766408 |
| 1 | C65816      | 9.0  | 5.1372E-12  | 536  | 354  | 301785602 |
| 1 | C62978      | 4.0  | 1.87E-20    | 452  | 1004 | 301784160 |
| 1 | C62654      | 8.0  | 2.68E-27    | 444  | 316  | 311246463 |
| 1 | C72210      | 10.0 | 6.25655E-09 | 1116 | 439  | 218675770 |
| 1 | C58848      | 7.0  | 4.36E-25    | 372  | 5172 | 301772840 |
| 1 | scaffold261 | 8.3  | 1.45E-18    | 1289 | 188  | 291385975 |
| 1 | C72376      | 8.0  | 5.66E-109   | 1164 | 833  | 301763551 |
| 1 | C62004      | 7.0  | 6.44813E-13 | 429  | 343  | 301775304 |
| 1 | C67762      | 8.0  | 1.71E-24    | 616  | 304  | 301768443 |
| 1 | C66040      | 8.0  | 5.93E-18    | 543  | 108  | 326928055 |
| 1 | C66314      | 7.0  | 3.35E-17    | 553  | 491  | 311272317 |
| 1 | C62462      | 9.0  | 2.84562E-13 | 439  | 578  | 301776496 |
| 1 | C62828      | 9.0  | 1.18505E-06 | 448  | 578  | 301776496 |
| 1 | C71176      | 9.0  | 1.79E-29    | 919  | 345  | 301779403 |
| 1 | C70412      | 10.0 | 2.86E-70    | 810  | 749  | 119624875 |
| 1 | C70722      | 10.0 | 5.58E-136   | 852  | 784  | 301767096 |
| 1 | C73076      | 8.0  | 5.15E-156   | 1497 | 784  | 301767096 |
| 1 | C69006      | 6.0  | 8.04127E-14 | 693  | 156  | 297299319 |
| 1 | C61600      | 5.0  | 1.44861E-12 | 421  | 1093 | 301758535 |
| 1 | C68948      | 5.0  | 2.37072E-10 | 688  | 1093 | 301758535 |
| 1 | C55768      | 10.0 | 6.87249E-15 | 327  | 2659 | 301783855 |
| 1 | C57686      | 6.0  | 1.48905E-09 | 353  | 2579 | 297288028 |
| 1 | C71496      | 9.0  | 4.67E-63    | 963  | 714  | 297485987 |
| 1 | C65064      | 12.0 | 4.72651E-14 | 511  | 1359 | 297490529 |
| 1 | C66152      | 8.0  | 2.38E-20    | 547  | 846  | 194209149 |
| 1 | C57032      | 10.0 | 1.23E-27    | 344  | 2054 | 281340843 |
| 1 | C59770      | 8.0  | 1.92E-18    | 388  | 1256 | 194218860 |
| 1 | C62474      | 8.0  | 7.37E-56    | 440  | 306  | 47576581  |
| 1 | C68970      | 5.0  | 7.53E-30    | 690  | 311  | 297692107 |
| 1 | C56530      | 10.0 | 5.03E-38    | 337  | 345  | 57114113  |
| 1 | C67040      | 8.0  | 2.70E-18    | 583  | 2776 | 194215380 |
| 1 | C67840      | 8.0  | 1.70E-27    | 619  | 2960 | 291390058 |
| 1 | C66074      | 6.0  | 3.06913E-09 | 544  | 785  | 7021933   |
| 1 | C69110      | 5.0  | 7.44178E-07 | 699  | 827  | 311275908 |
| 1 | C60822      | 9.0  | 7.64161E-06 | 406  | 847  | 74008523  |
| 1 | C68824      | 5.0  | 2.64859E-14 | 681  | 1716 | 301755346 |
| 1 | C60384      | 5.0  | 3.45025E-14 | 398  | 1483 | 126337051 |
| 1 | C61278      | 9.0  | 6.81082E-15 | 414  | 399  | 291386685 |
| 1 | C73250      | 10.0 | 6.49E-22    | 1648 | 1101 | 281347334 |
| 1 | C64620      | 8.0  | 4.00E-27    | 498  | 350  | 301772234 |
| 1 | C68094      | 7.0  | 1.78E-36    | 634  | 376  | 301766408 |
| 1 | C63766      | 6.0  | 6.49495E-10 | 473  | 1275 | 2981631   |
| 1 | C66274      | 5.0  | 6.57228E-10 | 552  | 1384 | 73964662  |

|   |             |      |             |      |      |           |
|---|-------------|------|-------------|------|------|-----------|
| 1 | C66206      | 8.0  | 6.41803E-08 | 549  | 88   | 281354217 |
| 1 | scaffold127 | 8.1  | 8.62557E-06 | 1664 | 103  | 296238245 |
| 1 | C64986      | 5.0  | 2.14E-25    | 509  | 1272 | 148645276 |
| 1 | C72422      | 11.0 | 2.09E-26    | 1176 | 381  | 281339729 |
| 1 | C54150      | 6.0  | 4.42293E-06 | 308  | 1887 | 302838799 |
| 1 | C64816      | 8.0  | 6.78682E-07 | 504  | 929  | 73994669  |
| 1 | C66146      | 5.0  | 1.059E-07   | 547  | 929  | 73994669  |
| 1 | C56636      | 10.0 | 2.10247E-07 | 339  | 183  | 297250762 |
| 1 | C54452      | 6.0  | 9.09873E-15 | 311  | 97   | 293343516 |
| 1 | C54566      | 57.0 | 1.04886E-07 | 312  | 1025 | 74007488  |
| 1 | C63350      | 9.0  | 2.73E-19    | 462  | 1046 | 301756943 |
| 1 | C66110      | 7.0  | 1.54027E-06 | 545  | 1275 | 2072951   |
| 1 | C71984      | 8.0  | 6.70E-31    | 1062 | 1344 | 73999461  |
| 1 | C70978      | 11.0 | 3.08E-43    | 891  | 730  | 74007942  |
| 1 | C68904      | 9.0  | 9.00872E-10 | 686  | 280  | 196010894 |
| 1 | scaffold22  | 6.0  | 3.89847E-10 | 494  | 335  | 301788290 |
| 1 | C59970      | 4.0  | 1.01736E-10 | 391  | 127  | 296315063 |
| 1 | C65600      | 7.0  | 6.76E-43    | 528  | 1344 | 73999461  |
| 1 | C61192      | 5.0  | 8.91587E-07 | 412  | 1272 | 73974662  |
| 1 | C66190      | 8.0  | 5.71E-40    | 548  | 183  | 297250762 |
| 1 | C69512      | 6.0  | 2.13E-23    | 728  | 1344 | 73971897  |
| 1 | C58894      | 2.0  | 3.53E-17    | 373  | 1402 | 74011366  |
| 1 | C67296      | 8.0  | 2.67E-24    | 595  | 1275 | 2981631   |
| 1 | C67516      | 10.0 | 2.36E-23    | 604  | 1275 | 2981631   |
| 1 | C69810      | 5.0  | 1.34E-34    | 750  | 1272 | 148645276 |
| 1 | C58036      | 5.0  | 7.58852E-06 | 359  | 128  | 281354416 |
| 1 | C59992      | 6.0  | 6.37233E-13 | 391  | 347  | 51339393  |
| 1 | C63374      | 10.0 | 1.71E-50    | 462  | 606  | 262188108 |
| 1 | C70060      | 9.0  | 5.69E-17    | 773  | 98   | 159524419 |
| 1 | scaffold140 | 6.3  | 7.87E-29    | 656  | 251  | 262179763 |
| 1 | C63340      | 7.0  | 2.55E-26    | 462  | 1079 | 74006100  |

---
