# Supplementary material for: Genome Analysis of the Domestic Dog (Korean Jindo) by Massively Parallel Sequencing
Source: PubMed Central journal article supplement — DNA Res. 2012 Apr 3;19(3):275–88. doi: 10.1093/dnares/dss011 (PMC3372376; doi:10.1093/dnares/dss011), 2012-04-03
Supplement: supp_dss011_dss011supp_table8.pdf [file supp_dss011_dss011supp_table8.pdf]

Supplementary Table 8. 863 scaffolds (derived from unmapped reads) were matched to the NR-protein database but unmatched to the NR-nucleotide database

| rank | contig_id | pscore | query_length | target_length | target_accession |           |
|------|-----------|--------|--------------|---------------|------------------|-----------|
| 1    | C53360    | 3.0    | 1.43516E-12  | 300           | 3404             | 83317874  |
| 1    | C53380    | 4.0    | 2.89174E-13  | 300           | 3404             | 83317874  |
| 1    | C53382    | 4.0    | 1.53333E-14  | 300           | 3404             | 83317874  |
| 1    | C53384    | 6.0    | 1.80888E-07  | 300           | 3404             | 83317874  |
| 1    | C53432    | 6.0    | 2.13676E-08  | 301           | 338              | 7443351   |
| 1    | C53452    | 5.0    | 4.59996E-11  | 301           | 68               | 113195393 |
| 1    | C53524    | 5.0    | 1.58098E-11  | 301           | 3404             | 83317874  |
| 1    | C53534    | 4.0    | 1.02476E-10  | 301           | 68               | 113195393 |
| 1    | C53538    | 5.0    | 6.00773E-11  | 301           | 3404             | 83317874  |
| 1    | C53590    | 4.0    | 2.13676E-08  | 302           | 3404             | 83317874  |
| 1    | C53662    | 5.0    | 4.59996E-11  | 302           | 3404             | 83317874  |
| 1    | C53740    | 5.0    | 3.76301E-13  | 303           | 3404             | 83317874  |
| 1    | C53744    | 4.0    | 7.09672E-12  | 303           | 3404             | 83317874  |
| 1    | C53766    | 6.0    | 4.75E-16     | 304           | 1716             | 301755346 |
| 1    | C53814    | 3.0    | 6.39531E-13  | 304           | 3404             | 83317874  |
| 1    | C53848    | 4.0    | 1.3335E-10   | 305           | 68               | 113195393 |
| 1    | C53876    | 6.0    | 5.0673E-10   | 305           | 3404             | 83317874  |
| 1    | C53878    | 4.0    | 5.98582E-11  | 305           | 3404             | 83317874  |
| 1    | C53892    | 7.0    | 3.28E-17     | 305           | 3404             | 83317874  |
| 1    | C54010    | 4.0    | 2.19804E-13  | 306           | 338              | 7443351   |
| 1    | C54028    | 5.0    | 1.34475E-08  | 306           | 68               | 113195393 |
| 1    | C54052    | 5.0    | 1.37491E-07  | 307           | 3404             | 83317874  |
| 1    | C54084    | 4.0    | 4.13014E-12  | 307           | 3404             | 83317874  |
| 1    | C54126    | 7.0    | 3.27251E-09  | 308           | 241              | 297269899 |
| 1    | C54138    | 8.0    | 2.67708E-11  | 308           | 3404             | 83317874  |
| 1    | C54164    | 4.0    | 6.80779E-15  | 308           | 3404             | 83317874  |
| 1    | C54184    | 4.0    | 3.38651E-06  | 308           | 3404             | 83317874  |
| 1    | C54210    | 7.0    | 1.73523E-10  | 308           | 3404             | 83317874  |
| 1    | C54226    | 2.0    | 2.11338E-08  | 309           | 1153             | 322504193 |
| 1    | C54242    | 4.0    | 1.20169E-11  | 309           | 68               | 113195393 |
| 1    | C54268    | 3.0    | 5.03021E-10  | 309           | 3404             | 83317874  |
| 1    | C54280    | 6.0    | 1.98536E-06  | 309           | 229              | 322507045 |
| 1    | C54284    | 7.0    | 2.67708E-11  | 309           | 3404             | 83317874  |
| 1    | C54306    | 5.0    | 5.39413E-12  | 309           | 3404             | 83317874  |
| 1    | C54314    | 13.0   | 9.48656E-09  | 309           | 3404             | 83317874  |
| 1    | C54318    | 11.0   | 1.16393E-06  | 309           | 68               | 113195393 |
| 1    | C54334    | 8.0    | 4.27403E-09  | 309           | 3404             | 83317874  |
| 1    | C54338    | 3.0    | 6.82359E-07  | 309           | 3404             | 83317874  |
| 1    | C54346    | 5.0    | 2.12E-16     | 310           | 3404             | 83317874  |
| 1    | C54404    | 6.0    | 2.11338E-08  | 310           | 68               | 113195393 |
| 1    | C54410    | 6.0    | 2.66725E-11  | 310           | 3404             | 83317874  |
| 1    | C54482    | 6.0    | 1.56369E-11  | 311           | 3404             | 83317874  |
| 1    | C54492    | 3.0    | 5.74196E-14  | 311           | 68               | 113195393 |
| 1    | C54544    | 8.0    | 9.13339E-12  | 312           | 527              | 170040829 |
| 1    | C54580    | 4.0    | 1.32374E-10  | 312           | 3404             | 83317874  |

|   |        |      |             |     |      |           |
|---|--------|------|-------------|-----|------|-----------|
| 1 | C54590 | 7.0  | 2.18194E-13 | 312 | 3404 | 83317874  |
| 1 | C54662 | 6.0  | 2.24E-18    | 313 | 3404 | 83317874  |
| 1 | C54680 | 9.0  | 5.74196E-14 | 313 | 3404 | 83317874  |
| 1 | C54714 | 5.0  | 9.75819E-14 | 314 | 3404 | 83317874  |
| 1 | C54718 | 3.0  | 6.54543E-10 | 314 | 209  | 170573162 |
| 1 | C54724 | 3.0  | 3.35384E-14 | 314 | 131  | 242069637 |
| 1 | C54750 | 5.0  | 8.26081E-13 | 314 | 68   | 113195393 |
| 1 | C54764 | 6.0  | 8.26081E-13 | 315 | 3404 | 83317874  |
| 1 | C54774 | 7.0  | 7.48893E-06 | 315 | 3404 | 83317874  |
| 1 | C54810 | 4.0  | 6.31E-16    | 315 | 3404 | 83317874  |
| 1 | C54814 | 5.0  | 7.48893E-06 | 315 | 1153 | 322504193 |
| 1 | C54836 | 5.0  | 1.55792E-11 | 316 | 3404 | 83317874  |
| 1 | C54840 | 7.0  | 8.25935E-08 | 316 | 209  | 170573162 |
| 1 | C54870 | 12.0 | 1.15E-17    | 316 | 3404 | 83317874  |
| 1 | C54884 | 6.0  | 3.36163E-06 | 316 | 3404 | 83317874  |
| 1 | C54932 | 11.0 | 2.10034E-11 | 316 | 3404 | 83317874  |
| 1 | C54958 | 6.0  | 5.71978E-09 | 317 | 3404 | 83317874  |
| 1 | C54972 | 5.0  | 2.8387E-08  | 317 | 68   | 113195393 |
| 1 | C55002 | 5.0  | 1.40557E-15 | 317 | 3404 | 83317874  |
| 1 | C55012 | 8.0  | 1.23134E-11 | 317 | 3404 | 83317874  |
| 1 | C55042 | 8.0  | 3.35325E-09 | 318 | 3404 | 83317874  |
| 1 | C55070 | 9.0  | 3.03289E-10 | 318 | 323  | 297714508 |
| 1 | C55086 | 4.0  | 1.89265E-12 | 318 | 3404 | 83317874  |
| 1 | C55098 | 3.0  | 1.50521E-09 | 318 | 3404 | 83317874  |
| 1 | C55100 | 7.0  | 2.38866E-15 | 318 | 3404 | 83317874  |
| 1 | C55132 | 5.0  | 4.21638E-12 | 319 | 3404 | 83317874  |
| 1 | C55144 | 3.0  | 1.71819E-13 | 319 | 68   | 113195393 |
| 1 | C55156 | 5.0  | 1.07222E-15 | 319 | 3404 | 83317874  |
| 1 | C55158 | 3.0  | 1.71183E-13 | 319 | 3404 | 83317874  |
| 1 | C55184 | 7.0  | 3.34084E-09 | 319 | 3404 | 83317874  |
| 1 | C55198 | 4.0  | 2.55799E-09 | 320 | 3404 | 83317874  |
| 1 | C55210 | 10.0 | 2.02212E-14 | 320 | 3404 | 83317874  |
| 1 | C55220 | 4.0  | 4.65E-19    | 320 | 3404 | 83317874  |
| 1 | C55234 | 3.0  | 7.93E-19    | 320 | 209  | 170573162 |
| 1 | C55242 | 6.0  | 5.88348E-14 | 320 | 3404 | 83317874  |
| 1 | C55302 | 6.0  | 4.06873E-07 | 321 | 3404 | 83317874  |
| 1 | C55370 | 5.0  | 7.65551E-14 | 321 | 3404 | 83317874  |
| 1 | C55536 | 8.0  | 4.32E-17    | 324 | 3404 | 83317874  |
| 1 | C55568 | 5.0  | 9.99841E-14 | 325 | 3404 | 83317874  |
| 1 | C55628 | 5.0  | 9.32333E-12 | 325 | 3404 | 83317874  |
| 1 | C55718 | 8.0  | 6.45662E-13 | 326 | 3404 | 83317874  |
| 1 | C55722 | 6.0  | 1.87859E-12 | 326 | 3404 | 83317874  |
| 1 | C55742 | 6.0  | 1.21E-19    | 326 | 3404 | 83317874  |
| 1 | C55756 | 5.0  | 5.11588E-10 | 327 | 3404 | 83317874  |
| 1 | C55780 | 3.0  | 3.89E-18    | 327 | 3404 | 83317874  |
| 1 | C55782 | 12.0 | 1.17667E-14 | 327 | 3404 | 83317874  |
| 1 | C55824 | 6.0  | 6.04321E-11 | 327 | 68   | 113195393 |
| 1 | C55836 | 5.0  | 2.89825E-13 | 327 | 3404 | 83317874  |

|   |        |      |             |     |      |           |
|---|--------|------|-------------|-----|------|-----------|
| 1 | C55848 | 7.0  | 2.45351E-12 | 328 | 3404 | 83317874  |
| 1 | C55860 | 8.0  | 5.08E-18    | 328 | 3404 | 83317874  |
| 1 | C55868 | 5.0  | 6.25374E-08 | 328 | 3404 | 83317874  |
| 1 | C55874 | 4.0  | 2.0071E-14  | 328 | 3404 | 83317874  |
| 1 | C55880 | 9.0  | 1.48849E-09 | 328 | 3404 | 83317874  |
| 1 | C55904 | 6.0  | 1.94E-17    | 328 | 3404 | 83317874  |
| 1 | C55912 | 5.0  | 4.03839E-07 | 328 | 3404 | 83317874  |
| 1 | C55976 | 4.0  | 1.17227E-14 | 329 | 786  | 297289774 |
| 1 | C56054 | 7.0  | 7.11191E-12 | 330 | 3404 | 83317874  |
| 1 | C56122 | 6.0  | 4.74E-16    | 331 | 3404 | 83317874  |
| 1 | C56224 | 14.0 | 2.35863E-07 | 333 | 3404 | 83317874  |
| 1 | C56234 | 4.0  | 3.27E-17    | 333 | 3404 | 83317874  |
| 1 | C56250 | 5.0  | 2.57341E-08 | 333 | 374  | 149022841 |
| 1 | C56298 | 5.0  | 2.0537E-11  | 334 | 3404 | 83317874  |
| 1 | C56312 | 5.0  | 2.13329E-08 | 334 | 3404 | 83317874  |
| 1 | C56318 | 8.0  | 1.20855E-11 | 334 | 68   | 113195393 |
| 1 | C56332 | 5.0  | 1.79913E-07 | 334 | 527  | 170040829 |
| 1 | C56404 | 5.0  | 1.92E-17    | 335 | 3404 | 83317874  |
| 1 | C56408 | 4.0  | 6.38412E-13 | 335 | 68   | 113195393 |
| 1 | C56456 | 4.0  | 4.86965E-13 | 336 | 527  | 170040829 |
| 1 | C56534 | 3.0  | 8.90831E-15 | 337 | 821  | 307150584 |
| 1 | C56560 | 7.0  | 1.85046E-12 | 338 | 3404 | 83317874  |
| 1 | C56600 | 8.0  | 9.83479E-06 | 338 | 190  | 119486002 |
| 1 | C56612 | 3.0  | 2.94E-18    | 339 | 284  | 260789714 |
| 1 | C56614 | 10.0 | 1.7254E-10  | 339 | 338  | 7443351   |
| 1 | C56628 | 6.0  | 9.48762E-08 | 339 | 243  | 261289537 |
| 1 | C56642 | 8.0  | 4.69E-16    | 339 | 3404 | 83317874  |
| 1 | C56644 | 7.0  | 7.03176E-12 | 339 | 3404 | 83317874  |
| 1 | C56674 | 9.0  | 3.26E-17    | 339 | 109  | 281346933 |
| 1 | C56718 | 4.0  | 7.50162E-06 | 340 | 3404 | 83317874  |
| 1 | C56744 | 5.0  | 9.79742E-06 | 340 | 3404 | 83317874  |
| 1 | C56768 | 7.0  | 1.27662E-13 | 341 | 3404 | 83317874  |
| 1 | C56836 | 4.0  | 5.34497E-15 | 342 | 3404 | 83317874  |
| 1 | C56878 | 3.0  | 2.49E-17    | 342 | 3404 | 83317874  |
| 1 | C56888 | 3.0  | 1.36712E-07 | 342 | 68   | 113195393 |
| 1 | C56922 | 7.0  | 8.25E-16    | 343 | 3404 | 83317874  |
| 1 | C56960 | 8.0  | 1.55E-22    | 343 | 3404 | 83317874  |
| 1 | C57006 | 8.0  | 1.04E-18    | 344 | 3404 | 83317874  |
| 1 | C57012 | 4.0  | 6.94879E-08 | 344 | 3404 | 83317874  |
| 1 | C57036 | 6.0  | 1.1935E-06  | 344 | 68   | 113195393 |
| 1 | C57062 | 7.0  | 6.98075E-15 | 345 | 3404 | 83317874  |
| 1 | C57162 | 8.0  | 1.27E-16    | 346 | 3404 | 83317874  |
| 1 | C57168 | 6.0  | 3.58521E-11 | 346 | 3404 | 83317874  |
| 1 | C57180 | 10.0 | 6.97028E-07 | 346 | 847  | 148685014 |
| 1 | C57204 | 10.0 | 4.02E-31    | 347 | 179  | 47605602  |
| 1 | C57224 | 4.0  | 6.95413E-15 | 347 | 68   | 113195393 |
| 1 | C57226 | 5.0  | 3.4513E-14  | 347 | 3404 | 83317874  |
| 1 | C57304 | 4.0  | 1.50054E-09 | 348 | 3404 | 83317874  |

|   |        |      |             |     |      |           |
|---|--------|------|-------------|-----|------|-----------|
| 1 | C57354 | 6.0  | 2.30614E-10 | 349 | 3404 | 83317874  |
| 1 | C57358 | 6.0  | 1.83428E-07 | 349 | 175  | 312121062 |
| 1 | C57360 | 5.0  | 4.05E-23    | 349 | 527  | 170040829 |
| 1 | C57380 | 7.0  | 7.52856E-08 | 349 | 209  | 170573162 |
| 1 | C57382 | 5.0  | 1.35199E-10 | 349 | 3404 | 83317874  |
| 1 | C57436 | 6.0  | 1.06876E-15 | 350 | 3404 | 83317874  |
| 1 | C57442 | 6.0  | 7.16884E-12 | 350 | 68   | 113195393 |
| 1 | C57478 | 3.0  | 7.67704E-06 | 351 | 68   | 113195393 |
| 1 | C57480 | 22.0 | 3.68181E-08 | 351 | 3404 | 83317874  |
| 1 | C57512 | 10.0 | 1.21812E-11 | 351 | 3404 | 83317874  |
| 1 | C57522 | 8.0  | 7.15E-20    | 351 | 3404 | 83317874  |
| 1 | C57530 | 8.0  | 2.81906E-08 | 351 | 3404 | 83317874  |
| 1 | C57548 | 5.0  | 1.34679E-10 | 352 | 188  | 115925514 |
| 1 | C57558 | 8.0  | 4.32E-17    | 352 | 700  | 270013850 |
| 1 | C57564 | 8.0  | 3.78664E-13 | 352 | 149  | 68010379  |
| 1 | C57568 | 6.0  | 1.69975E-13 | 352 | 3404 | 83317874  |
| 1 | C57576 | 6.0  | 3.54419E-11 | 352 | 3404 | 83317874  |
| 1 | C57602 | 4.0  | 3.78664E-13 | 352 | 68   | 113195393 |
| 1 | C57676 | 5.0  | 8.71E-18    | 353 | 3404 | 83317874  |
| 1 | C57760 | 5.0  | 4.03007E-15 | 355 | 3404 | 83317874  |
| 1 | C57856 | 6.0  | 1.53498E-06 | 356 | 3404 | 83317874  |
| 1 | C57898 | 4.0  | 1.87204E-12 | 357 | 3404 | 83317874  |
| 1 | C58020 | 4.0  | 9.91092E-06 | 358 | 3858 | 296005482 |
| 1 | C58068 | 6.0  | 2.51E-17    | 359 | 3404 | 83317874  |
| 1 | C58078 | 8.0  | 1.02324E-10 | 359 | 209  | 170573162 |
| 1 | C58090 | 6.0  | 9.56E-17    | 360 | 3404 | 83317874  |
| 1 | C58144 | 7.0  | 1.54E-18    | 361 | 209  | 170573162 |
| 1 | C58162 | 7.0  | 1.47181E-09 | 361 | 68   | 113195393 |
| 1 | C58204 | 5.0  | 2.59198E-14 | 361 | 3404 | 83317874  |
| 1 | C58218 | 6.0  | 2.96561E-10 | 362 | 3404 | 83317874  |
| 1 | C58268 | 4.0  | 1.08899E-12 | 362 | 3404 | 83317874  |
| 1 | C58302 | 6.0  | 1.52E-22    | 363 | 3404 | 83317874  |
| 1 | C58320 | 4.0  | 5.22266E-15 | 363 | 3404 | 83317874  |
| 1 | C58370 | 6.0  | 4.12201E-12 | 364 | 338  | 7443351   |
| 1 | C58398 | 5.0  | 2.51015E-11 | 365 | 68   | 113195393 |
| 1 | C58454 | 8.0  | 1.46032E-09 | 366 | 3404 | 83317874  |
| 1 | C58498 | 7.0  | 3.47582E-11 | 366 | 3404 | 83317874  |
| 1 | C58506 | 7.0  | 1.2411E-08  | 367 | 3404 | 83317874  |
| 1 | C58510 | 5.0  | 2.58786E-06 | 367 | 123  | 149032404 |
| 1 | C58688 | 7.0  | 4.23028E-12 | 370 | 3404 | 83317874  |
| 1 | C58692 | 5.0  | 2.8434E-13  | 370 | 3404 | 83317874  |
| 1 | C58696 | 4.0  | 4.10586E-12 | 370 | 3404 | 83317874  |
| 1 | C58764 | 8.0  | 5.89E-22    | 371 | 821  | 307150584 |
| 1 | C58774 | 7.0  | 1.96504E-09 | 371 | 3404 | 83317874  |
| 1 | C58778 | 5.0  | 9.42407E-12 | 371 | 68   | 113195393 |
| 1 | C58802 | 5.0  | 7.43776E-09 | 372 | 3404 | 83317874  |
| 1 | C58850 | 5.0  | 1.55699E-06 | 373 | 68   | 113195393 |
| 1 | C58864 | 4.0  | 1.27E-16    | 373 | 3404 | 83317874  |

|   |        |      |             |     |      |           |
|---|--------|------|-------------|-----|------|-----------|
| 1 | C58940 | 5.0  | 7.67905E-14 | 374 | 3404 | 83317874  |
| 1 | C58946 | 9.0  | 4.65872E-11 | 374 | 3404 | 83317874  |
| 1 | C59050 | 4.0  | 3.32548E-09 | 376 | 3404 | 83317874  |
| 1 | C59084 | 6.0  | 9.05614E-07 | 377 | 3404 | 83317874  |
| 1 | C59114 | 8.0  | 2.15E-24    | 377 | 209  | 170573162 |
| 1 | C59130 | 7.0  | 8.45665E-13 | 377 | 3404 | 83317874  |
| 1 | C59138 | 8.0  | 1.82475E-07 | 377 | 589  | 325074608 |
| 1 | C59166 | 5.0  | 8.99933E-15 | 378 | 3404 | 83317874  |
| 1 | C59204 | 3.0  | 3.24537E-06 | 379 | 68   | 113195393 |
| 1 | C59222 | 10.0 | 1.01E-16    | 379 | 962  | 82793635  |
| 1 | C59224 | 4.0  | 6.7006E-10  | 379 | 68   | 113195393 |
| 1 | C59268 | 5.0  | 2.99E-18    | 379 | 3404 | 83317874  |
| 1 | C59270 | 7.0  | 4.64032E-11 | 379 | 3404 | 83317874  |
| 1 | C59278 | 10.0 | 3.41974E-14 | 380 | 3404 | 83317874  |
| 1 | C59288 | 9.0  | 5.51007E-08 | 380 | 821  | 307150584 |
| 1 | C59290 | 4.0  | 6.43E-21    | 380 | 3404 | 83317874  |
| 1 | C59300 | 13.0 | 1.53862E-06 | 380 | 224  | 156835964 |
| 1 | C59354 | 7.0  | 1.10009E-12 | 381 | 574  | 301627950 |
| 1 | C59372 | 7.0  | 1.13842E-09 | 381 | 3404 | 83317874  |
| 1 | C59424 | 9.0  | 7.8838E-11  | 382 | 3404 | 83317874  |
| 1 | C59456 | 9.0  | 1.93412E-09 | 383 | 68   | 113195393 |
| 1 | C59524 | 8.0  | 1.01E-34    | 384 | 242  | 310128585 |
| 1 | C59530 | 10.0 | 2.19E-21    | 384 | 3404 | 83317874  |
| 1 | C59612 | 3.0  | 2.60359E-06 | 385 | 175  | 312121062 |
| 1 | C59630 | 4.0  | 3.40039E-06 | 386 | 589  | 325074608 |
| 1 | C59642 | 7.0  | 5.98835E-11 | 386 | 3404 | 83317874  |
| 1 | C59666 | 4.0  | 2.78E-16    | 386 | 3404 | 83317874  |
| 1 | C59676 | 15.0 | 1.09133E-12 | 386 | 3404 | 83317874  |
| 1 | C59686 | 5.0  | 9.54E-17    | 386 | 3404 | 83317874  |
| 1 | C59702 | 7.0  | 1.57E-19    | 386 | 3404 | 83317874  |
| 1 | C59744 | 3.0  | 8.9125E-07  | 387 | 3404 | 83317874  |
| 1 | C59766 | 9.0  | 6.398E-13   | 388 | 68   | 113195393 |
| 1 | C59886 | 5.0  | 3.48252E-11 | 390 | 3980 | 296004518 |
| 1 | C59888 | 4.0  | 2.86041E-13 | 390 | 68   | 113195393 |
| 1 | C59892 | 5.0  | 1.47E-17    | 390 | 3404 | 83317874  |
| 1 | C59928 | 8.0  | 5.77691E-06 | 390 | 1272 | 148645276 |
| 1 | C59980 | 7.0  | 1.51061E-14 | 391 | 3404 | 83317874  |
| 1 | C60014 | 8.0  | 7.00E-20    | 392 | 3404 | 83317874  |
| 1 | C60040 | 6.0  | 2.04165E-11 | 392 | 68   | 113195393 |
| 1 | C60058 | 9.0  | 5.74031E-14 | 392 | 3404 | 83317874  |
| 1 | C60068 | 8.0  | 9.14E-20    | 392 | 3404 | 83317874  |
| 1 | C60120 | 6.0  | 4.52447E-14 | 393 | 3404 | 83317874  |
| 1 | C60152 | 6.0  | 1.18216E-14 | 394 | 209  | 170573162 |
| 1 | C60158 | 6.0  | 8.53278E-13 | 394 | 3404 | 83317874  |
| 1 | C60168 | 9.0  | 9.77E-22    | 394 | 3404 | 83317874  |
| 1 | C60172 | 4.0  | 9.79148E-14 | 394 | 3404 | 83317874  |
| 1 | C60228 | 5.0  | 3.95E-18    | 395 | 3404 | 83317874  |
| 1 | C60304 | 5.0  | 6.115E-11   | 396 | 589  | 325074608 |

|   |        |      |             |     |      |           |
|---|--------|------|-------------|-----|------|-----------|
| 1 | C60312 | 9.0  | 4.65E-19    | 396 | 3404 | 83317874  |
| 1 | C60366 | 4.0  | 7.18E-20    | 397 | 3404 | 83317874  |
| 1 | C60468 | 7.0  | 1.65E-16    | 399 | 3404 | 83317874  |
| 1 | C60480 | 6.0  | 1.26474E-08 | 399 | 3404 | 83317874  |
| 1 | C60534 | 4.0  | 1.95917E-09 | 400 | 68   | 113195393 |
| 1 | C60546 | 4.0  | 7.65513E-14 | 401 | 3404 | 83317874  |
| 1 | C60548 | 6.0  | 2.08469E-11 | 401 | 3404 | 83317874  |
| 1 | C60604 | 7.0  | 2.63714E-06 | 402 | 1153 | 322504193 |
| 1 | C60668 | 5.0  | 3.43017E-06 | 403 | 3404 | 83317874  |
| 1 | C60688 | 7.0  | 1.7576E-10  | 403 | 3404 | 83317874  |
| 1 | C60696 | 8.0  | 4.7864E-08  | 404 | 3404 | 83317874  |
| 1 | C60710 | 8.0  | 1.81462E-15 | 404 | 3404 | 83317874  |
| 1 | C60716 | 4.0  | 7.64161E-06 | 404 | 3404 | 83317874  |
| 1 | C60724 | 9.0  | 1.34575E-10 | 404 | 229  | 322507045 |
| 1 | C60758 | 10.0 | 7.61032E-06 | 405 | 1207 | 74007516  |
| 1 | C60764 | 8.0  | 9.91636E-14 | 405 | 3404 | 83317874  |
| 1 | C60774 | 8.0  | 1.17893E-06 | 405 | 244  | 156355349 |
| 1 | C60810 | 7.0  | 6.64E-18    | 406 | 3404 | 83317874  |
| 1 | C60834 | 9.0  | 2.69E-19    | 406 | 3404 | 83317874  |
| 1 | C60856 | 9.0  | 6.22564E-08 | 407 | 3404 | 83317874  |
| 1 | C60866 | 9.0  | 2.79E-16    | 407 | 3404 | 83317874  |
| 1 | C60892 | 6.0  | 2.70048E-11 | 407 | 3404 | 83317874  |
| 1 | C60898 | 9.0  | 4.46159E-06 | 407 | 338  | 7443351   |
| 1 | C60924 | 4.0  | 2.2861E-10  | 408 | 3404 | 83317874  |
| 1 | C61008 | 9.0  | 3.29E-17    | 409 | 3404 | 83317874  |
| 1 | C61038 | 4.0  | 8.65144E-10 | 410 | 68   | 113195393 |
| 1 | C61062 | 5.0  | 1.16657E-14 | 410 | 3404 | 83317874  |
| 1 | C61090 | 3.0  | 4.41465E-14 | 411 | 3404 | 83317874  |
| 1 | C61150 | 4.0  | 1.57015E-11 | 412 | 3404 | 83317874  |
| 1 | C61186 | 7.0  | 2.59412E-06 | 412 | 3404 | 83317874  |
| 1 | C61198 | 8.0  | 2.19E-21    | 412 | 119  | 170579958 |
| 1 | C61242 | 6.0  | 4.56E-19    | 413 | 3404 | 83317874  |
| 1 | C61260 | 11.0 | 7.0481E-12  | 414 | 3404 | 83317874  |
| 1 | C61264 | 4.0  | 6.37474E-13 | 414 | 3404 | 83317874  |
| 1 | C61272 | 17.0 | 1.3237E-10  | 414 | 3404 | 83317874  |
| 1 | C61296 | 4.0  | 2.84963E-13 | 415 | 68   | 113195393 |
| 1 | C61298 | 3.0  | 5.58454E-09 | 415 | 3404 | 83317874  |
| 1 | C61300 | 4.0  | 1.46352E-09 | 415 | 3404 | 83317874  |
| 1 | C61304 | 4.0  | 1.0464E-15  | 415 | 3404 | 83317874  |
| 1 | C61360 | 6.0  | 1.72881E-10 | 416 | 68   | 113195393 |
| 1 | C61408 | 7.0  | 2.04E-19    | 417 | 3404 | 83317874  |
| 1 | C61432 | 5.0  | 9.15E-20    | 417 | 3404 | 83317874  |
| 1 | C61442 | 5.0  | 5.03007E-10 | 417 | 338  | 7443351   |
| 1 | C61454 | 6.0  | 8.50E-26    | 418 | 3404 | 83317874  |
| 1 | C61476 | 11.0 | 7.23316E-09 | 418 | 3404 | 83317874  |
| 1 | C61488 | 5.0  | 1.11592E-09 | 418 | 3404 | 83317874  |
| 1 | C61514 | 5.0  | 1.32E-18    | 419 | 3404 | 83317874  |
| 1 | C61578 | 8.0  | 1.01E-18    | 420 | 3404 | 83317874  |

|   |        |      |             |     |      |           |
|---|--------|------|-------------|-----|------|-----------|
| 1 | C61582 | 6.0  | 3.81213E-13 | 421 | 68   | 113195393 |
| 1 | C61592 | 4.0  | 3.35215E-14 | 421 | 68   | 113195393 |
| 1 | C61624 | 4.0  | 5.5047E-12  | 421 | 609  | 73964634  |
| 1 | C61666 | 8.0  | 4.06E-23    | 422 | 382  | 118083218 |
| 1 | C61736 | 6.0  | 5.15224E-10 | 424 | 3404 | 83317874  |
| 1 | C61762 | 6.0  | 1.88403E-12 | 424 | 3404 | 83317874  |
| 1 | C61844 | 6.0  | 1.30E-21    | 426 | 3404 | 83317874  |
| 1 | C61850 | 7.0  | 2.52E-25    | 426 | 3404 | 83317874  |
| 1 | C61856 | 6.0  | 3.78025E-13 | 426 | 3404 | 83317874  |
| 1 | C61948 | 6.0  | 6.44813E-13 | 428 | 3404 | 83317874  |
| 1 | C61996 | 6.0  | 8.10E-16    | 429 | 589  | 325074608 |
| 1 | C62024 | 5.0  | 2.13E-16    | 430 | 3404 | 83317874  |
| 1 | C62050 | 5.0  | 7.09919E-12 | 430 | 3404 | 83317874  |
| 1 | C62054 | 6.0  | 4.59E-19    | 430 | 3404 | 83317874  |
| 1 | C62056 | 7.0  | 5.8075E-14  | 430 | 3404 | 83317874  |
| 1 | C62080 | 8.0  | 8.67817E-10 | 431 | 3404 | 83317874  |
| 1 | C62082 | 8.0  | 8.37E-21    | 431 | 3404 | 83317874  |
| 1 | C62102 | 11.0 | 5.81E-17    | 432 | 1887 | 302838799 |
| 1 | C62116 | 7.0  | 1.17289E-06 | 432 | 1346 | 74007229  |
| 1 | C62156 | 6.0  | 6.39376E-13 | 433 | 3404 | 83317874  |
| 1 | C62274 | 5.0  | 4.0048E-15  | 436 | 3404 | 83317874  |
| 1 | C62296 | 10.0 | 8.58E-18    | 436 | 3404 | 83317874  |
| 1 | C62300 | 9.0  | 3.1597E-12  | 436 | 243  | 261289537 |
| 1 | C62326 | 4.0  | 1.16026E-14 | 437 | 3404 | 83317874  |
| 1 | C62348 | 8.0  | 2.4193E-12  | 437 | 3404 | 83317874  |
| 1 | C62468 | 6.0  | 2.32787E-15 | 440 | 3404 | 83317874  |
| 1 | C62556 | 12.0 | 1.15799E-06 | 442 | 68   | 113195393 |
| 1 | C62578 | 7.0  | 1.36472E-15 | 442 | 1385 | 66819811  |
| 1 | C62596 | 5.0  | 4.98873E-13 | 443 | 3404 | 83317874  |
| 1 | C62598 | 8.0  | 1.07E-23    | 443 | 2054 | 281340843 |
| 1 | C62662 | 7.0  | 7.71438E-06 | 444 | 229  | 322507045 |
| 1 | C62672 | 3.0  | 1.50E-17    | 444 | 3404 | 83317874  |
| 1 | C62682 | 4.0  | 3.11134E-15 | 444 | 589  | 325074608 |
| 1 | C62712 | 7.0  | 1.44527E-12 | 445 | 3404 | 83317874  |
| 1 | C62778 | 9.0  | 3.11857E-07 | 447 | 413  | 194238119 |
| 1 | C62836 | 9.0  | 4.48405E-07 | 448 | 527  | 170040829 |
| 1 | C62862 | 4.0  | 1.70E-21    | 449 | 3404 | 83317874  |
| 1 | C62888 | 5.0  | 5.84247E-14 | 449 | 3404 | 83317874  |
| 1 | C62924 | 8.0  | 1.59E-19    | 451 | 3404 | 83317874  |
| 1 | C63050 | 7.0  | 4.03789E-07 | 453 | 3858 | 296005482 |
| 1 | C63096 | 6.0  | 3.64E-24    | 454 | 3404 | 83317874  |
| 1 | C63134 | 6.0  | 1.02E-18    | 456 | 3404 | 83317874  |
| 1 | C63152 | 6.0  | 7.04925E-12 | 456 | 3404 | 83317874  |
| 1 | C63164 | 10.0 | 1.09E-20    | 456 | 178  | 296234236 |
| 1 | C63206 | 7.0  | 1.79E-23    | 458 | 3404 | 83317874  |
| 1 | C63268 | 8.0  | 3.04434E-15 | 460 | 3404 | 83317874  |
| 1 | C63312 | 6.0  | 4.39E-22    | 461 | 3404 | 83317874  |
| 1 | C63324 | 8.0  | 6.55E-18    | 461 | 3404 | 83317874  |

|   |             |      |             |     |      |           |
|---|-------------|------|-------------|-----|------|-----------|
| 1 | C63406      | 5.0  | 2.92643E-13 | 463 | 3404 | 83317874  |
| 1 | C63432      | 7.0  | 4.99173E-13 | 464 | 3404 | 83317874  |
| 1 | C63444      | 6.0  | 5.51E-20    | 464 | 3404 | 83317874  |
| 1 | C63458      | 5.0  | 2.46647E-12 | 465 | 3404 | 83317874  |
| 1 | C63554      | 6.0  | 3.80E-21    | 467 | 3404 | 83317874  |
| 1 | C63626      | 8.0  | 1.88016E-12 | 469 | 175  | 312121062 |
| 1 | C63638      | 11.0 | 3.54582E-11 | 470 | 3404 | 83317874  |
| 1 | C63654      | 8.0  | 1.53807E-14 | 470 | 3404 | 83317874  |
| 1 | C63672      | 4.0  | 1.29627E-13 | 471 | 3404 | 83317874  |
| 1 | C63674      | 8.0  | 1.69E-29    | 471 | 3404 | 83317874  |
| 1 | C63700      | 5.0  | 2.14E-16    | 471 | 3404 | 83317874  |
| 1 | C63748      | 8.0  | 2.21E-21    | 472 | 3404 | 83317874  |
| 1 | C63808      | 5.0  | 3.19282E-12 | 474 | 3404 | 83317874  |
| 1 | C63900      | 6.0  | 1.57E-19    | 477 | 3404 | 83317874  |
| 1 | C63908      | 5.0  | 7.04941E-12 | 477 | 68   | 113195393 |
| 1 | C63918      | 7.0  | 2.67877E-11 | 477 | 3404 | 83317874  |
| 1 | C63942      | 5.0  | 4.27673E-09 | 478 | 3404 | 83317874  |
| 1 | C63960      | 9.0  | 2.49E-33    | 479 | 237  | 156403857 |
| 1 | C63982      | 5.0  | 6.36E-21    | 479 | 3404 | 83317874  |
| 1 | C64008      | 7.0  | 2.12252E-08 | 480 | 175  | 312121062 |
| 1 | C64038      | 14.0 | 9.20682E-12 | 481 | 123  | 149032404 |
| 1 | C64100      | 5.0  | 3.47E-19    | 482 | 3404 | 83317874  |
| 1 | C64194      | 5.0  | 1.60452E-11 | 485 | 3404 | 83317874  |
| 1 | C64298      | 13.0 | 4.51E-17    | 488 | 2205 | 66800837  |
| 1 | C64324      | 8.0  | 6.28105E-08 | 489 | 191  | 281338568 |
| 1 | C64334      | 8.0  | 3.66E-16    | 489 | 3404 | 83317874  |
| 1 | C64376      | 4.0  | 1.81921E-07 | 490 | 967  | 124806630 |
| 1 | C64400      | 4.0  | 3.78449E-13 | 491 | 3404 | 83317874  |
| 1 | C64410      | 10.0 | 2.3955E-09  | 491 | 1272 | 66734174  |
| 1 | C64428      | 5.0  | 1.38335E-15 | 492 | 3404 | 83317874  |
| 1 | scaffold133 | 10.5 | 6.88144E-07 | 495 | 3404 | 83317874  |
| 1 | C64510      | 4.0  | 4.02493E-15 | 495 | 3404 | 83317874  |
| 1 | C64542      | 6.0  | 1.02591E-10 | 496 | 3404 | 83317874  |
| 1 | C64600      | 6.0  | 6.83403E-15 | 497 | 3404 | 83317874  |
| 1 | C64630      | 6.0  | 5.23263E-15 | 498 | 3404 | 83317874  |
| 1 | C64640      | 7.0  | 1.9884E-14  | 498 | 3404 | 83317874  |
| 1 | C64644      | 7.0  | 5.20854E-15 | 499 | 3404 | 83317874  |
| 1 | C64754      | 9.0  | 7.73E-19    | 503 | 821  | 307150584 |
| 1 | C64766      | 8.0  | 5.8587E-06  | 503 | 510  | 293359146 |
| 1 | C64800      | 6.0  | 1.65E-16    | 504 | 3404 | 83317874  |
| 1 | C64850      | 7.0  | 9.43E-25    | 505 | 3404 | 83317874  |
| 1 | C64874      | 7.0  | 5.87E-22    | 506 | 3404 | 83317874  |
| 1 | C64882      | 10.0 | 4.07138E-15 | 506 | 3404 | 83317874  |
| 1 | C64920      | 5.0  | 1.06E-26    | 507 | 3404 | 83317874  |
| 1 | C64924      | 4.0  | 1.15026E-07 | 507 | 3980 | 296004518 |
| 1 | C64936      | 7.0  | 4.65826E-11 | 508 | 234  | 110756233 |
| 1 | C64964      | 8.0  | 3.53279E-14 | 508 | 3404 | 83317874  |
| 1 | C64990      | 6.0  | 1.93E-20    | 509 | 3404 | 83317874  |



|   |           |      |             |     |      |           |
|---|-----------|------|-------------|-----|------|-----------|
| 1 | C65006    | 4.0  | 1.53E-17    | 509 | 3404 | 83317874  |
| 1 | C65058    | 5.0  | 1.79E-21    | 511 | 3404 | 83317874  |
| 1 | C65098    | 6.0  | 4.72E-22    | 512 | 3404 | 83317874  |
| 1 | C65118    | 4.0  | 3.99E-21    | 513 | 3404 | 83317874  |
| 1 | C65122    | 7.0  | 3.49E-25    | 513 | 3404 | 83317874  |
| 1 | C65142    | 6.0  | 5.00762E-11 | 514 | 68   | 113195393 |
| 1 | C65186    | 5.0  | 2.65527E-12 | 515 | 68   | 113195393 |
| 1 | C65194    | 7.0  | 4.37673E-15 | 516 | 243  | 261289537 |
| 1 | C65238    | 5.0  | 4.21E-18    | 517 | 3404 | 83317874  |
| 1 | C65280    | 4.0  | 5.42E-29    | 519 | 3404 | 83317874  |
| 1 | C65340    | 6.0  | 1.17308E-15 | 521 | 3404 | 83317874  |
| 1 | C65352    | 7.0  | 2.79861E-09 | 521 | 3404 | 83317874  |
| 1 | C65516    | 6.0  | 3.80E-25    | 526 | 3404 | 83317874  |
| 1 | C65522    | 7.0  | 2.31827E-06 | 526 | 3404 | 83317874  |
| 1 | C65538    | 5.0  | 6.70E-30    | 527 | 3404 | 83317874  |
| 1 | C65646    | 4.0  | 8.12212E-15 | 530 | 3404 | 83317874  |
| 1 | C65678    | 9.0  | 3.15207E-14 | 531 | 3404 | 83317874  |
| 1 | C65688    | 5.0  | 7.11533E-11 | 532 | 3404 | 83317874  |
| 1 | C65712    | 6.0  | 3.18E-27    | 532 | 3404 | 83317874  |
| 1 | C65778    | 5.0  | 7.50E-16    | 534 | 3404 | 83317874  |
| 1 | C65812    | 8.0  | 2.33E-17    | 535 | 209  | 170573162 |
| 1 | C65818    | 12.0 | 1.00259E-07 | 536 | 3404 | 83317874  |
| 1 | C65830    | 5.0  | 2.81E-18    | 536 | 3404 | 83317874  |
| 1 | C65834    | 5.0  | 6.47E-23    | 536 | 3404 | 83317874  |
| 1 | C65864    | 6.0  | 8.11E-34    | 537 | 3404 | 83317874  |
| 1 | C65900    | 4.0  | 6.66E-20    | 538 | 3404 | 83317874  |
| 1 | C65916    | 7.0  | 9.62E-19    | 539 | 3404 | 83317874  |
| 1 | C65926    | 10.0 | 5.85028E-08 | 539 | 68   | 113195393 |
| 1 | C65940    | 6.0  | 2.89E-23    | 540 | 3404 | 83317874  |
| 1 | C65958    | 6.0  | 1.48E-19    | 541 | 3404 | 83317874  |
| 1 | C66030    | 5.0  | 1.46E-22    | 543 | 3404 | 83317874  |
| 1 | C66032    | 7.0  | 3.11E-20    | 543 | 3404 | 83317874  |
| 1 | C66048    | 3.0  | 1.1856E-11  | 544 | 589  | 325074608 |
| 1 | C66118    | 8.0  | 2.38E-28    | 546 | 3404 | 83317874  |
| 1 | C66140    | 7.0  | 6.05E-32    | 546 | 3404 | 83317874  |
| 1 | C66144    | 8.0  | 4.31E-46    | 547 | 209  | 170573162 |
| 1 | C66170    | 7.0  | 7.30E-25    | 548 | 3404 | 83317874  |
| 1 | C66184    | 5.0  | 8.94423E-15 | 548 | 3404 | 83317874  |
| 1 | C66242    | 6.0  | 6.20846E-08 | 550 | 1612 | 159899059 |
| 1 | C66324    | 6.0  | 7.84E-22    | 554 | 3404 | 83317874  |
| 1 | scaffold1 | 9.7  | 3.19973E-07 | 556 | 3404 | 83317874  |
| 1 | C66462    | 4.0  | 9.63224E-15 | 559 | 3404 | 83317874  |
| 1 | C66482    | 9.0  | 4.33376E-07 | 560 | 149  | 68010379  |
| 1 | C66486    | 5.0  | 1.70E-19    | 560 | 3404 | 83317874  |
| 1 | C66496    | 8.0  | 2.29796E-08 | 560 | 271  | 296210798 |
| 1 | C66546    | 5.0  | 8.31906E-06 | 563 | 239  | 297688963 |
| 1 | C66582    | 6.0  | 1.66E-30    | 564 | 3404 | 83317874  |
| 1 | C66610    | 5.0  | 6.54547E-11 | 565 | 3404 | 83317874  |

|   |        |      |             |     |      |           |
|---|--------|------|-------------|-----|------|-----------|
| 1 | C66640 | 8.0  | 3.53449E-08 | 566 | 821  | 307150584 |
| 1 | C66652 | 5.0  | 8.0013E-09  | 566 | 68   | 113195393 |
| 1 | C66668 | 5.0  | 8.14167E-09 | 568 | 3404 | 83317874  |
| 1 | C66670 | 5.0  | 5.25E-24    | 568 | 3404 | 83317874  |
| 1 | C66706 | 10.0 | 5.27728E-08 | 569 | 3404 | 83317874  |
| 1 | C66716 | 10.0 | 6.43609E-14 | 569 | 3404 | 83317874  |
| 1 | C66768 | 11.0 | 2.78096E-08 | 572 | 1275 | 2981631   |
| 1 | C66772 | 5.0  | 1.27E-17    | 572 | 3404 | 83317874  |
| 1 | C66774 | 4.0  | 1.23211E-09 | 572 | 1275 | 92111129  |
| 1 | C66790 | 6.0  | 3.71764E-09 | 572 | 3404 | 83317874  |
| 1 | C66824 | 10.0 | 3.98901E-12 | 574 | 821  | 307150584 |
| 1 | C66844 | 5.0  | 6.01E-23    | 574 | 3404 | 83317874  |
| 1 | C66846 | 7.0  | 3.89E-22    | 575 | 3404 | 83317874  |
| 1 | C66850 | 7.0  | 6.44882E-09 | 575 | 234  | 110756233 |
| 1 | C66904 | 8.0  | 1.72E-17    | 577 | 3404 | 83317874  |
| 1 | C66912 | 3.0  | 4.38753E-13 | 578 | 3404 | 83317874  |
| 1 | C66930 | 6.0  | 2.94299E-09 | 578 | 3404 | 83317874  |
| 1 | C66970 | 5.0  | 2.70E-18    | 580 | 3404 | 83317874  |
| 1 | C67006 | 8.0  | 3.28E-40    | 581 | 315  | 307205528 |
| 1 | C67022 | 9.0  | 4.16E-19    | 582 | 3404 | 83317874  |
| 1 | C67034 | 9.0  | 1.21443E-10 | 583 | 3404 | 83317874  |
| 1 | C67046 | 4.0  | 8.53E-20    | 584 | 3404 | 83317874  |
| 1 | C67056 | 6.0  | 1.78E-17    | 584 | 3404 | 83317874  |
| 1 | C67062 | 9.0  | 2.03E-21    | 584 | 3404 | 83317874  |
| 1 | C67068 | 6.0  | 6.31E-23    | 584 | 3404 | 83317874  |
| 1 | C67076 | 8.0  | 2.31655E-08 | 585 | 821  | 307150584 |
| 1 | C67156 | 5.0  | 3.1953E-06  | 589 | 1153 | 322504193 |
| 1 | C67236 | 6.0  | 1.29E-26    | 592 | 3404 | 83317874  |
| 1 | C67252 | 11.0 | 2.60486E-11 | 593 | 358  | 146084079 |
| 1 | C67302 | 10.0 | 2.05422E-08 | 595 | 527  | 170040829 |
| 1 | C67312 | 6.0  | 8.63059E-07 | 596 | 229  | 322507045 |
| 1 | C67322 | 9.0  | 1.73E-23    | 596 | 3404 | 83317874  |
| 1 | C67344 | 7.0  | 5.95E-24    | 597 | 3404 | 83317874  |
| 1 | C67346 | 3.0  | 6.79E-28    | 597 | 209  | 170573162 |
| 1 | C67354 | 9.0  | 5.40586E-09 | 597 | 1275 | 74007557  |
| 1 | C67362 | 7.0  | 2.59258E-11 | 597 | 3404 | 83317874  |
| 1 | C67382 | 8.0  | 1.59669E-08 | 598 | 118  | 290990821 |
| 1 | C67386 | 9.0  | 1.91E-22    | 598 | 3404 | 83317874  |
| 1 | C67444 | 5.0  | 3.10E-20    | 600 | 3404 | 83317874  |
| 1 | C67492 | 9.0  | 1.24E-24    | 603 | 3404 | 83317874  |
| 1 | C67494 | 5.0  | 1.19902E-11 | 603 | 3404 | 83317874  |
| 1 | C67528 | 6.0  | 2.98E-34    | 605 | 3404 | 83317874  |
| 1 | C67554 | 8.0  | 5.11352E-11 | 605 | 194  | 281346081 |
| 1 | C67590 | 5.0  | 1.23726E-10 | 608 | 68   | 113195393 |
| 1 | C67654 | 8.0  | 2.13E-27    | 611 | 3404 | 83317874  |
| 1 | C67680 | 7.0  | 3.18E-23    | 612 | 3404 | 83317874  |
| 1 | C67704 | 6.0  | 4.07E-26    | 614 | 3404 | 83317874  |
| 1 | C67706 | 8.0  | 4.50E-17    | 614 | 3404 | 83317874  |

|   |        |      |             |     |      |           |
|---|--------|------|-------------|-----|------|-----------|
| 1 | C67708 | 6.0  | 1.07474E-10 | 614 | 3404 | 83317874  |
| 1 | C67802 | 6.0  | 1.68E-19    | 618 | 3404 | 83317874  |
| 1 | C67842 | 6.0  | 2.71E-25    | 619 | 3404 | 83317874  |
| 1 | C67846 | 9.0  | 1.94979E-07 | 619 | 517  | 257876199 |
| 1 | C67860 | 5.0  | 1.76E-16    | 620 | 3404 | 83317874  |
| 1 | C67864 | 5.0  | 1.82072E-13 | 620 | 3404 | 83317874  |
| 1 | C67902 | 8.0  | 5.91E-28    | 622 | 3404 | 83317874  |
| 1 | C67910 | 8.0  | 9.80749E-07 | 622 | 1272 | 66734174  |
| 1 | C67920 | 8.0  | 5.12E-16    | 622 | 3404 | 83317874  |
| 1 | C67950 | 6.0  | 3.36298E-15 | 625 | 3404 | 83317874  |
| 1 | C67958 | 7.0  | 7.49193E-15 | 625 | 3404 | 83317874  |
| 1 | C67980 | 8.0  | 6.65076E-11 | 626 | 3404 | 83317874  |
| 1 | C67992 | 8.0  | 2.87E-30    | 627 | 3404 | 83317874  |
| 1 | C67994 | 5.0  | 4.28E-18    | 627 | 3404 | 83317874  |
| 1 | C68000 | 10.0 | 2.55059E-10 | 628 | 821  | 307150584 |
| 1 | C68170 | 8.0  | 1.25E-28    | 638 | 589  | 325074608 |
| 1 | C68174 | 7.0  | 4.59E-23    | 638 | 3404 | 83317874  |
| 1 | C68182 | 8.0  | 8.97E-19    | 638 | 3404 | 83317874  |
| 1 | C68198 | 8.0  | 7.33E-21    | 639 | 3404 | 83317874  |
| 1 | C68204 | 6.0  | 7.55E-34    | 639 | 3404 | 83317874  |
| 1 | C68206 | 5.0  | 5.5208E-08  | 639 | 3404 | 83317874  |
| 1 | C68232 | 7.0  | 5.15535E-14 | 641 | 3404 | 83317874  |
| 1 | C68242 | 8.0  | 5.32E-19    | 641 | 3404 | 83317874  |
| 1 | C68270 | 6.0  | 2.0979E-07  | 643 | 3404 | 83317874  |
| 1 | C68274 | 8.0  | 1.32E-49    | 643 | 209  | 170573162 |
| 1 | C68282 | 6.0  | 1.79E-22    | 644 | 3404 | 83317874  |
| 1 | C68288 | 6.0  | 1.73E-17    | 644 | 3404 | 83317874  |
| 1 | C68298 | 6.0  | 7.30052E-08 | 644 | 3404 | 83317874  |
| 1 | C68362 | 8.0  | 8.17133E-07 | 648 | 3404 | 83317874  |
| 1 | C68396 | 6.0  | 2.39E-30    | 650 | 3404 | 83317874  |
| 1 | C68398 | 6.0  | 9.10E-22    | 650 | 3404 | 83317874  |
| 1 | C68418 | 8.0  | 7.45E-24    | 651 | 3404 | 83317874  |
| 1 | C68434 | 7.0  | 9.40E-27    | 652 | 3404 | 83317874  |
| 1 | C68438 | 4.0  | 1.85E-30    | 652 | 3404 | 83317874  |
| 1 | C68490 | 7.0  | 3.31E-27    | 657 | 589  | 325074608 |
| 1 | C68496 | 7.0  | 3.23106E-07 | 657 | 527  | 170040829 |
| 1 | C68520 | 8.0  | 8.00263E-13 | 659 | 3404 | 83317874  |
| 1 | C68618 | 6.0  | 1.65E-21    | 666 | 3404 | 83317874  |
| 1 | C68626 | 6.0  | 7.14E-25    | 666 | 3404 | 83317874  |
| 1 | C68664 | 6.0  | 6.30E-21    | 669 | 3404 | 83317874  |
| 1 | C68680 | 7.0  | 3.08E-28    | 670 | 3404 | 83317874  |
| 1 | C68694 | 4.0  | 2.02E-27    | 671 | 3404 | 83317874  |
| 1 | C68884 | 6.0  | 2.36E-26    | 685 | 589  | 325074608 |
| 1 | C68926 | 7.0  | 2.71245E-06 | 686 | 309  | 137915    |
| 1 | C68940 | 8.0  | 2.07E-22    | 687 | 3404 | 83317874  |
| 1 | C68950 | 8.0  | 3.94E-21    | 688 | 3404 | 83317874  |
| 1 | C68984 | 7.0  | 5.70273E-12 | 691 | 3404 | 83317874  |
| 1 | C69000 | 5.0  | 1.46E-23    | 692 | 3404 | 83317874  |

|   |             |      |             |     |      |           |
|---|-------------|------|-------------|-----|------|-----------|
| 1 | C69034      | 4.0  | 7.49E-28    | 694 | 3404 | 83317874  |
| 1 | C69082      | 7.0  | 7.33E-23    | 697 | 3404 | 83317874  |
| 1 | C69106      | 10.0 | 1.82E-21    | 698 | 3404 | 83317874  |
| 1 | C69118      | 7.0  | 7.99E-25    | 699 | 3404 | 83317874  |
| 1 | C69168      | 6.0  | 3.88E-19    | 702 | 3404 | 83317874  |
| 1 | C69174      | 6.0  | 1.36E-32    | 702 | 3404 | 83317874  |
| 1 | C69206      | 5.0  | 3.43475E-15 | 705 | 3404 | 83317874  |
| 1 | C69214      | 8.0  | 2.69E-20    | 705 | 3404 | 83317874  |
| 1 | C69220      | 5.0  | 1.86605E-13 | 706 | 68   | 113195393 |
| 1 | C69290      | 6.0  | 1.87E-29    | 710 | 3404 | 83317874  |
| 1 | C69302      | 6.0  | 4.79E-33    | 712 | 3404 | 83317874  |
| 1 | C69320      | 3.0  | 1.31487E-06 | 713 | 3404 | 83317874  |
| 1 | C69336      | 7.0  | 1.00E-22    | 715 | 3404 | 83317874  |
| 1 | C69364      | 6.0  | 2.28E-22    | 718 | 3404 | 83317874  |
| 1 | C69404      | 9.0  | 1.39E-27    | 720 | 3404 | 83317874  |
| 1 | C69412      | 8.0  | 4.63E-23    | 721 | 3404 | 83317874  |
| 1 | C69446      | 6.0  | 2.15E-20    | 723 | 3404 | 83317874  |
| 1 | C69452      | 5.0  | 3.21E-24    | 723 | 3404 | 83317874  |
| 1 | C69470      | 7.0  | 1.9067E-08  | 724 | 3404 | 83317874  |
| 1 | C69506      | 11.0 | 4.10469E-11 | 727 | 1272 | 148645276 |
| 1 | C69538      | 8.0  | 3.53E-18    | 730 | 3404 | 83317874  |
| 1 | C69540      | 6.0  | 1.10E-27    | 730 | 3404 | 83317874  |
| 1 | C69546      | 7.0  | 2.07557E-10 | 731 | 175  | 312121062 |
| 1 | C69554      | 10.0 | 3.44E-21    | 732 | 589  | 325074608 |
| 1 | C69564      | 5.0  | 1.07336E-14 | 733 | 3404 | 83317874  |
| 1 | C69600      | 6.0  | 2.85055E-15 | 736 | 3404 | 83317874  |
| 1 | C69606      | 8.0  | 5.14E-25    | 736 | 3404 | 83317874  |
| 1 | C69620      | 6.0  | 1.16E-16    | 737 | 3404 | 83317874  |
| 1 | C69648      | 5.0  | 1.80E-25    | 738 | 3404 | 83317874  |
| 1 | C69654      | 10.0 | 3.88766E-12 | 739 | 3404 | 83317874  |
| 1 | C69676      | 9.0  | 9.57563E-11 | 741 | 3404 | 83317874  |
| 1 | C69694      | 7.0  | 8.41E-31    | 742 | 3404 | 83317874  |
| 1 | C69722      | 7.0  | 1.94E-19    | 744 | 3404 | 83317874  |
| 1 | C69784      | 7.0  | 8.32535E-10 | 748 | 3404 | 83317874  |
| 1 | C69792      | 8.0  | 5.96635E-08 | 748 | 3404 | 83317874  |
| 1 | C69802      | 8.0  | 1.97E-27    | 749 | 3404 | 83317874  |
| 1 | C69814      | 7.0  | 1.48E-22    | 751 | 3404 | 83317874  |
| 1 | C69816      | 7.0  | 6.21393E-13 | 751 | 3404 | 83317874  |
| 1 | C69852      | 9.0  | 1.68E-26    | 754 | 3404 | 83317874  |
| 1 | C69870      | 6.0  | 9.63E-30    | 755 | 3404 | 83317874  |
| 1 | C69888      | 6.0  | 7.22E-17    | 757 | 3404 | 83317874  |
| 1 | C69910      | 6.0  | 6.94E-20    | 759 | 3404 | 83317874  |
| 1 | scaffold239 | 7.5  | 8.48E-18    | 761 | 3404 | 83317874  |
| 1 | C69930      | 8.0  | 6.48E-26    | 761 | 3404 | 83317874  |
| 1 | C69932      | 8.0  | 8.18E-29    | 761 | 3404 | 83317874  |
| 1 | C69964      | 7.0  | 3.2589E-09  | 764 | 68   | 113195393 |
| 1 | C69970      | 6.0  | 1.01E-18    | 764 | 3404 | 83317874  |
| 1 | C70032      | 7.0  | 1.26E-32    | 771 | 589  | 325074608 |

|   |             |      |             |     |      |           |
|---|-------------|------|-------------|-----|------|-----------|
| 1 | C70052      | 5.0  | 3.00E-34    | 773 | 3404 | 83317874  |
| 1 | C70064      | 7.0  | 1.71E-21    | 774 | 3404 | 83317874  |
| 1 | C70076      | 5.0  | 1.97531E-09 | 774 | 3404 | 83317874  |
| 1 | C70124      | 4.0  | 5.22E-26    | 780 | 3404 | 83317874  |
| 1 | C70130      | 8.0  | 7.89502E-06 | 781 | 3404 | 83317874  |
| 1 | C70146      | 6.0  | 3.30932E-12 | 783 | 3404 | 83317874  |
| 1 | scaffold36  | 7.8  | 4.98501E-08 | 784 | 3404 | 83317874  |
| 1 | C70174      | 8.0  | 8.21688E-11 | 784 | 3404 | 83317874  |
| 1 | C70182      | 6.0  | 3.80E-24    | 785 | 3404 | 83317874  |
| 1 | C70226      | 7.0  | 1.46E-31    | 790 | 3404 | 83317874  |
| 1 | C70246      | 7.0  | 7.78E-25    | 791 | 3404 | 83317874  |
| 1 | C70262      | 7.0  | 1.06E-21    | 793 | 3404 | 83317874  |
| 1 | C70272      | 7.0  | 1.58E-25    | 795 | 3404 | 83317874  |
| 1 | C70274      | 8.0  | 2.36571E-13 | 795 | 3404 | 83317874  |
| 1 | C70316      | 5.0  | 6.51E-27    | 798 | 3404 | 83317874  |
| 1 | C70342      | 9.0  | 4.31787E-15 | 802 | 700  | 270013850 |
| 1 | scaffold160 | 8.7  | 1.06069E-08 | 808 | 353  | 168020974 |
| 1 | C70408      | 8.0  | 9.03E-16    | 809 | 3404 | 83317874  |
| 1 | C70410      | 9.0  | 2.29E-27    | 809 | 3404 | 83317874  |
| 1 | C70436      | 8.0  | 8.0264E-12  | 813 | 3404 | 83317874  |
| 1 | C70444      | 7.0  | 1.12E-21    | 814 | 3404 | 83317874  |
| 1 | C70462      | 8.0  | 6.52E-22    | 816 | 3404 | 83317874  |
| 1 | C70464      | 6.0  | 2.32E-19    | 816 | 3404 | 83317874  |
| 1 | C70490      | 7.0  | 1.27525E-09 | 818 | 3404 | 83317874  |
| 1 | C70562      | 8.0  | 9.39E-16    | 829 | 3404 | 83317874  |
| 1 | C70566      | 4.0  | 5.51657E-08 | 830 | 68   | 113195393 |
| 1 | C70568      | 7.0  | 3.56E-23    | 830 | 3404 | 83317874  |
| 1 | C70644      | 9.0  | 1.2614E-15  | 842 | 821  | 307150584 |
| 1 | C70658      | 7.0  | 5.52262E-11 | 844 | 3404 | 83317874  |
| 1 | C70674      | 9.0  | 1.60684E-10 | 847 | 175  | 312121062 |
| 1 | C70680      | 7.0  | 1.61E-18    | 847 | 3980 | 296004518 |
| 1 | C70712      | 5.0  | 1.57431E-13 | 850 | 3404 | 83317874  |
| 1 | C70728      | 7.0  | 1.20E-29    | 852 | 3404 | 83317874  |
| 1 | scaffold39  | 10.5 | 2.35E-41    | 854 | 154  | 307191659 |
| 1 | C70740      | 8.0  | 2.88E-23    | 854 | 3404 | 83317874  |
| 1 | C70748      | 7.0  | 2.81E-18    | 855 | 3404 | 83317874  |
| 1 | C70764      | 6.0  | 3.77E-39    | 857 | 589  | 325074608 |
| 1 | C70778      | 7.0  | 1.60666E-13 | 860 | 3404 | 83317874  |
| 1 | C70780      | 5.0  | 2.82E-26    | 860 | 3404 | 83317874  |
| 1 | C70806      | 7.0  | 7.74E-24    | 864 | 3404 | 83317874  |
| 1 | C70810      | 7.0  | 1.98E-35    | 865 | 589  | 325074608 |
| 1 | C70820      | 8.0  | 4.57E-24    | 866 | 3404 | 83317874  |
| 1 | C70830      | 5.0  | 1.38E-20    | 867 | 3404 | 83317874  |
| 1 | C70832      | 8.0  | 2.96E-23    | 867 | 3404 | 83317874  |
| 1 | C70840      | 9.0  | 5.2725E-12  | 868 | 3404 | 83317874  |
| 1 | C70848      | 7.0  | 6.62E-31    | 870 | 3404 | 83317874  |
| 1 | C70886      | 7.0  | 2.02E-27    | 876 | 589  | 325074608 |
| 1 | C70896      | 6.0  | 2.41E-20    | 878 | 3404 | 83317874  |

|   |             |      |             |     |      |           |
|---|-------------|------|-------------|-----|------|-----------|
| 1 | C70908      | 5.0  | 8.82E-31    | 879 | 3404 | 83317874  |
| 1 | C70916      | 6.0  | 7.76374E-11 | 880 | 3404 | 83317874  |
| 1 | C70934      | 7.0  | 1.16E-30    | 883 | 3404 | 83317874  |
| 1 | C70936      | 8.0  | 2.95E-18    | 884 | 3404 | 83317874  |
| 1 | C70954      | 9.0  | 1.16E-22    | 888 | 3404 | 83317874  |
| 1 | C70964      | 8.0  | 2.78E-16    | 889 | 3404 | 83317874  |
| 1 | C70976      | 7.0  | 1.07E-23    | 891 | 3404 | 83317874  |
| 1 | C71010      | 7.0  | 3.66E-32    | 894 | 242  | 310128585 |
| 1 | C71042      | 3.0  | 1.61701E-11 | 900 | 3404 | 83317874  |
| 1 | C71072      | 63.0 | 1.92565E-10 | 903 | 230  | 309270393 |
| 1 | C71082      | 7.0  | 1.38589E-10 | 904 | 245  | 312116944 |
| 1 | C71090      | 7.0  | 2.51E-28    | 906 | 3404 | 83317874  |
| 1 | C71148      | 8.0  | 1.08E-26    | 916 | 3404 | 83317874  |
| 1 | C71154      | 6.0  | 2.66E-33    | 917 | 589  | 325074608 |
| 1 | C71162      | 5.0  | 2.54E-19    | 917 | 589  | 325074608 |
| 1 | C71166      | 8.0  | 2.41E-26    | 918 | 3404 | 83317874  |
| 1 | C71198      | 5.0  | 5.45E-18    | 921 | 3404 | 83317874  |
| 1 | C71204      | 9.0  | 4.04E-13    | 922 | 3404 | 83317874  |
| 1 | C71210      | 10.0 | 1.25879E-06 | 923 | 821  | 307150584 |
| 1 | C71226      | 4.0  | 1.4923E-15  | 924 | 131  | 242069637 |
| 1 | C71234      | 5.0  | 3.00E-24    | 925 | 3404 | 83317874  |
| 1 | C71240      | 9.0  | 6.69815E-08 | 926 | 700  | 270013850 |
| 1 | C71274      | 7.0  | 2.03E-28    | 930 | 3404 | 83317874  |
| 1 | C71278      | 7.0  | 2.47E-26    | 930 | 3404 | 83317874  |
| 1 | C71282      | 7.0  | 1.11E-34    | 931 | 589  | 325074608 |
| 1 | C71290      | 6.0  | 5.92E-20    | 932 | 589  | 325074608 |
| 1 | C71296      | 8.0  | 3.04E-24    | 933 | 3404 | 83317874  |
| 1 | C71334      | 8.0  | 5.44E-29    | 939 | 3404 | 83317874  |
| 1 | C71358      | 7.0  | 1.75762E-11 | 943 | 175  | 312121062 |
| 1 | C71370      | 6.0  | 3.11E-24    | 944 | 3404 | 83317874  |
| 1 | C71414      | 6.0  | 1.23E-28    | 950 | 3404 | 83317874  |
| 1 | C71424      | 5.0  | 1.51E-26    | 953 | 3404 | 83317874  |
| 1 | C71446      | 6.0  | 7.06E-32    | 956 | 3404 | 83317874  |
| 1 | C71454      | 8.0  | 2.6952E-15  | 956 | 3404 | 83317874  |
| 1 | C71456      | 8.0  | 6.6909E-06  | 957 | 3404 | 83317874  |
| 1 | C71474      | 7.0  | 1.39191E-11 | 959 | 3404 | 83317874  |
| 1 | C71478      | 8.0  | 2.29963E-06 | 960 | 700  | 270013850 |
| 1 | C71482      | 7.0  | 3.10084E-11 | 960 | 3404 | 83317874  |
| 1 | C71498      | 7.0  | 2.96E-38    | 964 | 589  | 325074608 |
| 1 | C71506      | 8.0  | 4.32E-21    | 965 | 3404 | 83317874  |
| 1 | C71536      | 5.0  | 1.66E-20    | 970 | 3404 | 83317874  |
| 1 | C71542      | 7.0  | 1.04E-30    | 972 | 3404 | 83317874  |
| 1 | C71544      | 7.0  | 2.55E-29    | 972 | 3404 | 83317874  |
| 1 | C71570      | 7.0  | 4.55E-34    | 977 | 589  | 325074608 |
| 1 | C71582      | 8.0  | 7.05E-19    | 978 | 3404 | 83317874  |
| 1 | C71598      | 7.0  | 5.43794E-11 | 981 | 3404 | 83317874  |
| 1 | scaffold257 | 7.5  | 7.16E-19    | 986 | 3404 | 83317874  |
| 1 | C71620      | 5.0  | 1.11E-27    | 989 | 3404 | 83317874  |

|   |             |      |             |      |      |           |
|---|-------------|------|-------------|------|------|-----------|
| 1 | C71632      | 8.0  | 1.49E-32    | 991  | 589  | 325074608 |
| 1 | C71652      | 8.0  | 1.05E-17    | 996  | 3404 | 83317874  |
| 1 | C71668      | 7.0  | 3.75E-23    | 998  | 3404 | 83317874  |
| 1 | C71674      | 5.0  | 3.17954E-14 | 999  | 3404 | 83317874  |
| 1 | C71680      | 10.0 | 6.86E-25    | 1001 | 589  | 325074608 |
| 1 | C71696      | 8.0  | 1.34969E-12 | 1003 | 3404 | 83317874  |
| 1 | scaffold137 | 9.4  | 1.30728E-07 | 1005 | 3404 | 83317874  |
| 1 | C71714      | 7.0  | 1.26327E-10 | 1006 | 3404 | 83317874  |
| 1 | C71738      | 7.0  | 5.92831E-08 | 1010 | 3404 | 83317874  |
| 1 | C71746      | 8.0  | 2.65E-16    | 1011 | 3404 | 83317874  |
| 1 | C71790      | 20.0 | 2.45574E-09 | 1020 | 3404 | 83317874  |
| 1 | C71860      | 8.0  | 2.11E-16    | 1032 | 3404 | 83317874  |
| 1 | C71870      | 10.0 | 1.46834E-09 | 1034 | 821  | 307150584 |
| 1 | C71896      | 7.0  | 9.92211E-14 | 1041 | 3404 | 83317874  |
| 1 | C71942      | 9.0  | 4.37E-17    | 1054 | 3404 | 83317874  |
| 1 | C71950      | 8.0  | 4.80E-32    | 1056 | 589  | 325074608 |
| 1 | C71982      | 8.0  | 3.07E-18    | 1062 | 3404 | 83317874  |
| 1 | C71994      | 7.0  | 4.55E-22    | 1063 | 589  | 325074608 |
| 1 | C72018      | 7.0  | 2.51417E-12 | 1065 | 68   | 113195393 |
| 1 | C72032      | 8.0  | 1.70E-16    | 1069 | 3404 | 83317874  |
| 1 | C72066      | 5.0  | 5.72E-36    | 1082 | 589  | 325074608 |
| 1 | C72106      | 6.0  | 6.42E-27    | 1090 | 589  | 325074608 |
| 1 | C72122      | 7.0  | 1.64E-30    | 1095 | 589  | 325074608 |
| 1 | C72128      | 7.0  | 1.89E-18    | 1097 | 3404 | 83317874  |
| 1 | C72130      | 7.0  | 4.80E-30    | 1097 | 3404 | 83317874  |
| 1 | C72144      | 7.0  | 9.79304E-15 | 1101 | 3404 | 83317874  |
| 1 | C72150      | 6.0  | 2.75E-17    | 1102 | 3404 | 83317874  |
| 1 | C72158      | 7.0  | 1.15E-23    | 1104 | 3404 | 83317874  |
| 1 | C72174      | 7.0  | 1.28E-30    | 1106 | 589  | 325074608 |
| 1 | C72188      | 9.0  | 2.99237E-06 | 1112 | 589  | 325074608 |
| 1 | C72192      | 6.0  | 4.60916E-12 | 1112 | 175  | 312121062 |
| 1 | C72228      | 9.0  | 1.59E-28    | 1120 | 3404 | 83317874  |
| 1 | C72232      | 6.0  | 5.89297E-15 | 1121 | 3404 | 83317874  |
| 1 | C72240      | 9.0  | 1.96E-34    | 1122 | 3404 | 83317874  |
| 1 | C72256      | 10.0 | 3.48E-23    | 1127 | 3404 | 83317874  |
| 1 | C72272      | 7.0  | 1.47E-29    | 1131 | 589  | 325074608 |
| 1 | C72284      | 7.0  | 4.62E-23    | 1138 | 589  | 325074608 |
| 1 | C72286      | 8.0  | 1.22E-23    | 1139 | 589  | 325074608 |
| 1 | C72298      | 9.0  | 1.30E-25    | 1142 | 589  | 325074608 |
| 1 | C72332      | 8.0  | 5.33E-27    | 1154 | 3404 | 83317874  |
| 1 | C72378      | 8.0  | 2.94072E-08 | 1164 | 821  | 307150584 |
| 1 | C72408      | 67.0 | 3.32E-16    | 1174 | 321  | 84620605  |
| 1 | C72414      | 7.0  | 8.79989E-09 | 1174 | 3404 | 83317874  |
| 1 | C72426      | 9.0  | 3.03E-17    | 1178 | 3404 | 83317874  |
| 1 | C72444      | 6.0  | 3.23E-35    | 1183 | 589  | 325074608 |
| 1 | C72454      | 7.0  | 1.85E-22    | 1186 | 3404 | 83317874  |
| 1 | C72460      | 8.0  | 1.52E-16    | 1188 | 589  | 325074608 |
| 1 | C72490      | 9.0  | 9.43429E-06 | 1200 | 700  | 270013850 |

|   |             |      |             |      |      |           |
|---|-------------|------|-------------|------|------|-----------|
| 1 | C72524      | 6.0  | 3.40E-19    | 1215 | 589  | 325074608 |
| 1 | C72538      | 8.0  | 7.34E-30    | 1221 | 3404 | 83317874  |
| 1 | C72584      | 7.0  | 1.61E-40    | 1236 | 3404 | 83317874  |
| 1 | C72586      | 6.0  | 5.94E-19    | 1236 | 3404 | 83317874  |
| 1 | C72594      | 9.0  | 4.42081E-14 | 1239 | 3404 | 83317874  |
| 1 | C72602      | 7.0  | 2.97625E-10 | 1240 | 3404 | 83317874  |
| 1 | C72612      | 7.0  | 2.35E-23    | 1242 | 3404 | 83317874  |
| 1 | C72642      | 7.0  | 6.90E-39    | 1251 | 589  | 325074608 |
| 1 | C72664      | 7.0  | 3.58E-27    | 1257 | 3404 | 83317874  |
| 1 | C72714      | 9.0  | 3.28E-20    | 1277 | 3404 | 83317874  |
| 1 | C72720      | 7.0  | 7.07E-47    | 1281 | 717  | 325085610 |
| 1 | C72730      | 7.0  | 1.13947E-12 | 1285 | 3404 | 83317874  |
| 1 | C72748      | 6.0  | 2.04E-25    | 1299 | 589  | 325074608 |
| 1 | C72760      | 9.0  | 6.40606E-11 | 1305 | 175  | 312121062 |
| 1 | C72784      | 6.0  | 2.37E-29    | 1317 | 717  | 325085610 |
| 1 | C72804      | 9.0  | 4.38E-23    | 1326 | 3404 | 83317874  |
| 1 | scaffold264 | 8.4  | 9.17E-29    | 1331 | 3404 | 83317874  |
| 1 | C72812      | 10.0 | 1.12E-26    | 1333 | 3404 | 83317874  |
| 1 | C72826      | 9.0  | 1.17725E-07 | 1341 | 3404 | 83317874  |
| 1 | C72840      | 8.0  | 1.00643E-06 | 1350 | 821  | 307150584 |
| 1 | C72860      | 7.0  | 2.11E-36    | 1363 | 717  | 325085610 |
| 1 | C72874      | 7.0  | 6.40E-33    | 1370 | 3404 | 83317874  |
| 1 | C72892      | 8.0  | 3.55E-31    | 1379 | 589  | 325074608 |
| 1 | C72906      | 7.0  | 1.84169E-11 | 1384 | 3404 | 83317874  |
| 1 | C72908      | 7.0  | 7.95E-31    | 1386 | 717  | 325085610 |
| 1 | C72914      | 7.0  | 4.70E-23    | 1391 | 3404 | 83317874  |
| 1 | C72924      | 7.0  | 1.32E-25    | 1400 | 717  | 325085610 |
| 1 | C72936      | 7.0  | 6.01E-26    | 1414 | 3404 | 83317874  |
| 1 | C72944      | 8.0  | 1.70E-28    | 1416 | 3404 | 83317874  |
| 1 | C72952      | 8.0  | 1.35857E-09 | 1421 | 3404 | 83317874  |
| 1 | C72992      | 10.0 | 1.52E-32    | 1441 | 3404 | 83317874  |
| 1 | C72994      | 7.0  | 3.41725E-08 | 1442 | 3404 | 83317874  |
| 1 | C73014      | 8.0  | 2.83E-18    | 1455 | 3404 | 83317874  |
| 1 | C73018      | 55.0 | 5.35028E-09 | 1456 | 170  | 312096252 |
| 1 | C73028      | 7.0  | 4.10E-25    | 1465 | 717  | 325085610 |
| 1 | C73036      | 6.0  | 4.85E-42    | 1469 | 717  | 325085610 |
| 1 | C73066      | 8.0  | 1.15E-30    | 1492 | 3404 | 83317874  |
| 1 | C73068      | 8.0  | 4.36E-30    | 1493 | 589  | 325074608 |
| 1 | C73072      | 6.0  | 2.56E-22    | 1495 | 3404 | 83317874  |
| 1 | C73082      | 7.0  | 5.36E-36    | 1502 | 589  | 325074608 |
| 1 | C73088      | 9.0  | 1.67E-29    | 1507 | 589  | 325074608 |
| 1 | C73090      | 7.0  | 5.22E-31    | 1507 | 717  | 325085610 |
| 1 | C73094      | 8.0  | 6.88449E-07 | 1510 | 175  | 312121062 |
| 1 | C73102      | 6.0  | 7.84E-27    | 1516 | 3404 | 83317874  |
| 1 | C73130      | 6.0  | 1.27E-40    | 1531 | 717  | 325085610 |
| 1 | C73140      | 7.0  | 4.11E-23    | 1535 | 3404 | 83317874  |
| 1 | C73142      | 14.0 | 2.41185E-10 | 1536 | 413  | 82013847  |
| 1 | C73144      | 8.0  | 6.14E-27    | 1536 | 3404 | 83317874  |



|   |        |      |             |      |      |           |
|---|--------|------|-------------|------|------|-----------|
| 1 | C73154 | 7.0  | 1.67E-32    | 1541 | 717  | 325085610 |
| 1 | C73160 | 8.0  | 2.81212E-12 | 1544 | 821  | 307150584 |
| 1 | C73178 | 7.0  | 1.48E-28    | 1557 | 717  | 325085610 |
| 1 | C73198 | 12.0 | 1.28E-19    | 1580 | 559  | 70908135  |
| 1 | C73238 | 15.0 | 2.19804E-08 | 1626 | 300  | 296216059 |
| 1 | C73262 | 6.0  | 2.05827E-15 | 1669 | 3404 | 83317874  |
| 1 | C73278 | 7.0  | 6.95E-19    | 1689 | 3404 | 83317874  |
| 1 | C73280 | 7.0  | 1.39E-27    | 1689 | 717  | 325085610 |
| 1 | C73290 | 7.0  | 9.79307E-13 | 1701 | 3404 | 83317874  |
| 1 | C73294 | 8.0  | 1.15E-29    | 1705 | 717  | 325085610 |
| 1 | C73304 | 7.0  | 3.39E-37    | 1719 | 717  | 325085610 |
| 1 | C73308 | 7.0  | 1.70E-20    | 1723 | 3404 | 83317874  |
| 1 | C73314 | 7.0  | 1.03E-33    | 1739 | 717  | 325085610 |
| 1 | C73318 | 8.0  | 2.39066E-14 | 1744 | 3404 | 83317874  |
| 1 | C73328 | 10.0 | 6.76E-18    | 1759 | 700  | 270013850 |
| 1 | C73334 | 8.0  | 2.69179E-13 | 1765 | 3404 | 83317874  |
| 1 | C73344 | 7.0  | 2.52E-27    | 1777 | 3404 | 83317874  |
| 1 | C73356 | 8.0  | 7.76E-24    | 1802 | 3404 | 83317874  |
| 1 | C73358 | 8.0  | 1.79597E-12 | 1804 | 3404 | 83317874  |
| 1 | C73360 | 8.0  | 4.90E-18    | 1809 | 3404 | 83317874  |
| 1 | C73366 | 8.0  | 6.17E-37    | 1815 | 589  | 325074608 |
| 1 | C73368 | 7.0  | 3.28E-38    | 1816 | 589  | 325074608 |
| 1 | C73372 | 7.0  | 5.06E-47    | 1822 | 911  | 189442218 |
| 1 | C73384 | 8.0  | 2.03358E-11 | 1836 | 175  | 312121062 |
| 1 | C73388 | 7.0  | 1.11E-25    | 1840 | 3404 | 83317874  |
| 1 | C73390 | 8.0  | 1.91E-17    | 1846 | 3404 | 83317874  |
| 1 | C73396 | 8.0  | 2.88E-29    | 1864 | 717  | 325085610 |
| 1 | C73398 | 6.0  | 2.80E-24    | 1869 | 333  | 315034652 |
| 1 | C73404 | 11.0 | 1.03E-42    | 1874 | 1887 | 302838799 |
| 1 | C73406 | 7.0  | 4.81E-32    | 1883 | 717  | 325085610 |
| 1 | C73410 | 7.0  | 4.84E-32    | 1890 | 717  | 325085610 |
| 1 | C73414 | 5.0  | 3.06E-18    | 1898 | 3404 | 83317874  |
| 1 | C73432 | 8.0  | 4.80E-35    | 1929 | 717  | 325085610 |
| 1 | C73452 | 7.0  | 6.13E-38    | 1961 | 717  | 325085610 |
| 1 | C73462 | 8.0  | 2.02595E-12 | 1991 | 589  | 325074608 |
| 1 | C73468 | 8.0  | 1.19E-28    | 1997 | 717  | 325085610 |
| 1 | C73472 | 7.0  | 9.72E-39    | 2004 | 724  | 115757056 |
| 1 | C73474 | 8.0  | 9.48369E-10 | 2004 | 245  | 312116944 |
| 1 | C73480 | 8.0  | 9.90E-23    | 2025 | 3404 | 83317874  |
| 1 | C73498 | 7.0  | 1.54828E-15 | 2042 | 3404 | 83317874  |
| 1 | C73518 | 7.0  | 4.05E-43    | 2098 | 717  | 325085610 |
| 1 | C73522 | 7.0  | 8.78E-38    | 2108 | 724  | 115757056 |
| 1 | C73532 | 17.0 | 3.52E-18    | 2132 | 3404 | 83317874  |
| 1 | C73542 | 12.0 | 5.10E-33    | 2146 | 589  | 325074608 |
| 1 | C73544 | 8.0  | 2.62E-37    | 2152 | 724  | 115757056 |
| 1 | C73566 | 9.0  | 1.88E-30    | 2218 | 3039 | 42519588  |
| 1 | C73586 | 7.0  | 8.70E-47    | 2280 | 1455 | 326679400 |
| 1 | C73588 | 7.0  | 3.09E-44    | 2282 | 911  | 189442218 |

|   |        |      |             |      |      |           |
|---|--------|------|-------------|------|------|-----------|
| 1 | C73594 | 9.0  | 8.61E-26    | 2313 | 3404 | 83317874  |
| 1 | C73598 | 7.0  | 3.17E-28    | 2321 | 724  | 115757056 |
| 1 | C73600 | 8.0  | 2.60E-30    | 2325 | 717  | 325085610 |
| 1 | C73602 | 9.0  | 4.59E-43    | 2335 | 1551 | 326679416 |
| 1 | C73622 | 8.0  | 4.03E-34    | 2399 | 717  | 325085610 |
| 1 | C73624 | 8.0  | 4.36E-20    | 2414 | 3404 | 83317874  |
| 1 | C73626 | 8.0  | 1.35E-37    | 2416 | 717  | 325085610 |
| 1 | C73628 | 6.0  | 4.36E-36    | 2424 | 911  | 189442218 |
| 1 | C73636 | 8.0  | 1.83E-37    | 2503 | 717  | 325085610 |
| 1 | C73646 | 7.0  | 5.60E-34    | 2536 | 3404 | 83317874  |
| 1 | C73648 | 9.0  | 3.54E-18    | 2537 | 700  | 270013850 |
| 1 | C73652 | 7.0  | 1.88E-29    | 2555 | 717  | 325085610 |
| 1 | C73654 | 9.0  | 8.21E-17    | 2559 | 3404 | 83317874  |
| 1 | C73658 | 8.0  | 4.53E-31    | 2581 | 589  | 325074608 |
| 1 | C73682 | 8.0  | 2.16E-39    | 2715 | 1551 | 326679416 |
| 1 | C73686 | 8.0  | 6.44651E-15 | 2762 | 3404 | 83317874  |
| 1 | C73688 | 9.0  | 1.30399E-15 | 2788 | 3404 | 83317874  |
| 1 | C73690 | 7.0  | 1.35E-44    | 2802 | 1551 | 326679416 |
| 1 | C73700 | 10.0 | 4.82923E-08 | 2902 | 700  | 270013850 |
| 1 | C73704 | 8.0  | 9.79E-30    | 2910 | 589  | 325074608 |
| 1 | C73708 | 6.0  | 1.16E-46    | 2918 | 911  | 189442218 |
| 1 | C73710 | 8.0  | 2.11E-35    | 3000 | 717  | 325085610 |
| 1 | C73718 | 7.0  | 3.13E-18    | 3055 | 3404 | 83317874  |
| 1 | C73720 | 21.0 | 5.73302E-10 | 3065 | 700  | 270013850 |
| 1 | C73722 | 9.0  | 1.97009E-09 | 3084 | 821  | 307150584 |
| 1 | C73724 | 8.0  | 2.67E-33    | 3088 | 717  | 325085610 |
| 1 | C73726 | 8.0  | 1.13E-31    | 3103 | 1551 | 326679416 |
| 1 | C73728 | 8.0  | 2.37E-37    | 3126 | 724  | 115757056 |
| 1 | C73734 | 8.0  | 1.61E-36    | 3268 | 717  | 325085610 |
| 1 | C73738 | 8.0  | 1.12E-61    | 3312 | 1551 | 326679416 |
| 1 | C73742 | 8.0  | 3.01E-30    | 3337 | 717  | 325085610 |
| 1 | C73744 | 8.0  | 1.82E-35    | 3337 | 717  | 325085610 |
| 1 | C73746 | 6.0  | 7.68E-42    | 3357 | 724  | 115757056 |
| 1 | C73748 | 6.0  | 1.28E-28    | 3365 | 3404 | 83317874  |
| 1 | C73750 | 7.0  | 2.47E-19    | 3431 | 3404 | 83317874  |
| 1 | C73754 | 7.0  | 1.28E-18    | 3584 | 3404 | 83317874  |
| 1 | C73760 | 9.0  | 3.18E-36    | 3740 | 724  | 115757056 |
| 1 | C73762 | 8.0  | 2.14E-48    | 3763 | 1551 | 326679416 |
| 1 | C73764 | 7.0  | 6.74E-18    | 3777 | 3404 | 83317874  |
| 1 | C73766 | 7.0  | 5.80E-28    | 3961 | 717  | 325085610 |
| 1 | C73770 | 7.0  | 2.94E-54    | 4213 | 1551 | 326679416 |
| 1 | C73772 | 8.0  | 7.59E-26    | 4230 | 3404 | 83317874  |
| 1 | C73776 | 8.0  | 7.95E-63    | 4322 | 1551 | 326679416 |
| 1 | C73778 | 6.0  | 7.19E-59    | 4443 | 1551 | 326679416 |
| 1 | C73782 | 8.0  | 1.17E-35    | 4656 | 589  | 325074608 |
| 1 | C73784 | 7.0  | 2.20E-50    | 4667 | 1551 | 326679416 |
| 1 | C73786 | 8.0  | 2.12E-40    | 6171 | 724  | 115757056 |
| 1 | C73788 | 7.0  | 1.06E-53    | 6642 | 911  | 189442218 |

|   |             |          |      |      |           |
|---|-------------|----------|------|------|-----------|
| 1 | C73792 11.0 | 7.05E-59 | 7284 | 1551 | 326679416 |
| 1 | C73794 7.0  | 8.69E-27 | 8833 | 724  | 115757056 |

---
