# Supplementary material for: Genome Analysis of the Domestic Dog (Korean Jindo) by Massively Parallel Sequencing
Source: PubMed Central journal article supplement — DNA Res. 2012 Apr 3;19(3):275–88. doi: 10.1093/dnares/dss011 (PMC3372376; doi:10.1093/dnares/dss011), 2012-04-03
Supplement: supp_dss011_dss011supp_table9.pdf [file supp_dss011_dss011supp_table9.pdf]

Supplementary Table 9. 958 scaffolds (derived from unmapped reads) were matched to the EST database

| rank | scaffold_id     | pscore      | query_length | target_length | target_accession |
|------|-----------------|-------------|--------------|---------------|------------------|
| 1    | C72252 7.0      | 3.84195E-11 | 1127         | 559           | 5394589          |
| 1    | C60550 3.0      | 2.22E-16    | 401          | 471           | 90842973         |
| 1    | C54260 8.0      | 1.50427E-07 | 309          | 568           | 83264405         |
| 1    | C64934 6.0      | 1.09E-49    | 508          | 325           | 24808385         |
| 1    | C68292 6.0      | 7.23E-107   | 644          | 383           | 37795726         |
| 1    | C60584 6.0      | 1.43E-17    | 401          | 541           | 182571748        |
| 1    | C66840 5.0      | 2.23E-23    | 574          | 549           | 83103410         |
| 1    | C65484 8.0      | 2.72726E-10 | 525          | 740           | 60433614         |
| 1    | C56280 9.0      | 1.17E-17    | 334          | 677           | 8164824          |
| 1    | C67874 9.0      | 5.07184E-09 | 621          | 736           | 288247254        |
| 1    | C59162 7.0      | 5.49E-20    | 378          | 549           | 288309227        |
| 1    | C62614 6.0      | 1.54E-51    | 443          | 834           | 112226981        |
| 1    | C56470 10.0     | 1.22E-165   | 336          | 564           | 50443307         |
| 1    | C68888 9.0      | 8.76524E-08 | 685          | 727           | 60441042         |
| 1    | scaffold68 6.5  | 1.73228E-09 | 830          | 668           | 45768051         |
| 1    | C60580 8.0      | 9.48E-22    | 401          | 245           | 282740563        |
| 1    | C72546 9.0      | 1.01776E-08 | 1223         | 428           | 282760759        |
| 1    | C73252 10.0     | 1.67E-23    | 1650         | 480           | 282742657        |
| 1    | C72160 9.0      | 1.30E-72    | 1104         | 503           | 199587855        |
| 1    | C55992 8.0      | 1.03072E-08 | 329          | 769           | 30757753         |
| 1    | scaffold234 7.0 | 6.22549E-07 | 1213         | 556           | 60561116         |
| 1    | C72198 6.0      | 2.25306E-06 | 1113         | 671           | 60436615         |
| 1    | C67648 9.0      | 0           | 611          | 653           | 119262662        |
| 1    | C59020 6.0      | 1.37E-165   | 375          | 422           | 104298275        |
| 1    | C53924 3.0      | 9.14937E-06 | 305          | 670           | 112775079        |
| 1    | C71462 5.0      | 4.93E-44    | 958          | 751           | 84588257         |
| 1    | C65166 61.0     | 5.31E-101   | 515          | 900           | 84586140         |
| 1    | C69170 8.0      | 7.22E-27    | 702          | 710           | 148274761        |
| 1    | C67882 6.0      | 2.02E-45    | 621          | 697           | 302100617        |
| 1    | C71848 5.0      | 2.63E-61    | 1028         | 722           | 82959722         |
| 1    | C60000 4.0      | 0           | 391          | 842           | 84584040         |
| 1    | C56096 5.0      | 5.34E-29    | 331          | 523           | 47438508         |
| 1    | C61238 4.0      | 6.76E-29    | 413          | 738           | 60993011         |
| 1    | C61556 5.0      | 1.82E-69    | 420          | 564           | 83224081         |
| 1    | C61738 4.0      | 0           | 424          | 681           | 62136384         |
| 1    | C62732 4.0      | 3.88544E-15 | 446          | 471           | 80893274         |
| 1    | C67412 5.0      | 3.92E-28    | 599          | 798           | 190270082        |
| 1    | C65902 6.0      | 1.72581E-08 | 538          | 767           | 67564902         |
| 1    | C61378 5.0      | 1.19E-36    | 416          | 493           | 183087483        |
| 1    | C66028 8.0      | 5.33E-24    | 543          | 460           | 154813123        |
| 1    | C63756 10.0     | 6.55E-88    | 473          | 567           | 18820869         |
| 1    | C69212 11.0     | 9.45E-48    | 705          | 696           | 60614609         |
| 1    | C69294 9.0      | 9.89E-51    | 710          | 692           | 56276599         |
| 1    | C56190 4.0      | 1.06E-82    | 333          | 759           | 60613503         |
| 1    | C57208 5.0      | 4.31127E-08 | 347          | 368           | 183979923        |
| 1    | C70990 9.0      | 0           | 892          | 806           | 56392024         |

|   |             |      |             |      |     |           |
|---|-------------|------|-------------|------|-----|-----------|
| 1 | C54000      | 8.0  | 3.17E-67    | 306  | 861 | 302095434 |
| 1 | C67318      | 5.0  | 1.64E-141   | 596  | 784 | 60626460  |
| 1 | C56578      | 8.0  | 5.46E-29    | 338  | 640 | 62137366  |
| 1 | C57650      | 8.0  | 1.34E-23    | 353  | 640 | 62137366  |
| 1 | C59442      | 9.0  | 3.29896E-15 | 382  | 629 | 156184186 |
| 1 | C65082      | 6.0  | 1.04967E-09 | 512  | 629 | 156184186 |
| 1 | C67250      | 7.0  | 4.82588E-09 | 592  | 561 | 104302307 |
| 1 | C73208      | 7.0  | 2.07612E-07 | 1591 | 330 | 157989902 |
| 1 | C73284      | 7.0  | 2.38318E-13 | 1692 | 188 | 104301096 |
| 1 | C73768      | 7.0  | 6.16E-16    | 4188 | 640 | 62137366  |
| 1 | C54384      | 17.0 | 4.61E-23    | 310  | 806 | 23703746  |
| 1 | C54630      | 6.0  | 7.01E-19    | 313  | 606 | 18824030  |
| 1 | C56940      | 6.0  | 4.25821E-08 | 343  | 693 | 60435609  |
| 1 | C57488      | 6.0  | 5.68E-29    | 351  | 664 | 45765337  |
| 1 | C70040      | 8.0  | 7.39E-21    | 772  | 613 | 60561268  |
| 1 | C64476      | 7.0  | 3.33E-31    | 494  | 403 | 60640686  |
| 1 | C71576      | 8.0  | 2.12885E-12 | 978  | 743 | 62848333  |
| 1 | C58340      | 8.0  | 1.44E-26    | 364  | 660 | 60638418  |
| 1 | scaffold26  | 4.0  | 4.80E-30    | 456  | 513 | 18820068  |
| 1 | C53708      | 4.0  | 1.52949E-10 | 303  | 894 | 34413961  |
| 1 | C53936      | 5.0  | 1.29E-32    | 305  | 433 | 60559745  |
| 1 | C60614      | 7.0  | 1.60E-26    | 402  | 636 | 302107841 |
| 1 | C63592      | 10.0 | 2.72E-19    | 468  | 536 | 20071541  |
| 1 | C66800      | 5.0  | 1.22604E-12 | 573  | 674 | 259802214 |
| 1 | C71466      | 9.0  | 5.07966E-10 | 958  | 358 | 50710163  |
| 1 | C61314      | 49.0 | 1.75E-103   | 415  | 538 | 20429839  |
| 1 | C61790      | 7.0  | 8.10E-41    | 425  | 538 | 20429839  |
| 1 | scaffold136 | 9.0  | 1.32E-21    | 551  | 638 | 62142732  |
| 1 | scaffold219 | 6.0  | 1.32E-22    | 847  | 573 | 182585177 |
| 1 | C70704      | 4.0  | 4.66016E-13 | 849  | 904 | 45760654  |
| 1 | scaffold263 | 6.6  | 3.70E-116   | 1144 | 811 | 23694334  |
| 1 | C59840      | 6.0  | 8.51E-16    | 389  | 715 | 62851158  |
| 1 | C61100      | 8.0  | 8.36585E-10 | 411  | 773 | 34409249  |
| 1 | C53586      | 9.0  | 1.42E-41    | 302  | 799 | 67564050  |
| 1 | C58710      | 3.0  | 9.39E-28    | 370  | 724 | 62839303  |
| 1 | C60320      | 5.0  | 6.71E-32    | 396  | 528 | 56274902  |
| 1 | C60500      | 7.0  | 1.72E-32    | 400  | 683 | 60572996  |
| 1 | C61436      | 4.0  | 1.54E-20    | 417  | 799 | 34410677  |
| 1 | C64632      | 3.0  | 2.67987E-13 | 498  | 580 | 60541709  |
| 1 | C64786      | 6.0  | 7.12E-17    | 503  | 416 | 60636041  |
| 1 | C65330      | 7.0  | 8.25E-26    | 520  | 552 | 60564783  |
| 1 | scaffold167 | 7.1  | 8.96E-94    | 596  | 678 | 60436393  |
| 1 | C70098      | 8.0  | 4.25394E-13 | 777  | 363 | 104301931 |
| 1 | scaffold233 | 6.5  | 1.97E-18    | 844  | 714 | 62841705  |
| 1 | C71110      | 10.0 | 9.79E-30    | 909  | 511 | 60523677  |
| 1 | C72682      | 44.0 | 1.84E-16    | 1261 | 416 | 60636041  |
| 1 | C72712      | 6.0  | 6.81273E-10 | 1277 | 363 | 104301931 |
| 1 | C72898      | 7.0  | 2.01E-16    | 1381 | 416 | 60636041  |

|   |             |      |             |      |      |           |
|---|-------------|------|-------------|------|------|-----------|
| 1 | C61680      | 4.0  | 1.01E-58    | 423  | 647  | 302109432 |
| 1 | C66066      | 6.0  | 8.40E-60    | 544  | 692  | 302079446 |
| 1 | C53450      | 7.0  | 6.82E-93    | 301  | 600  | 302069047 |
| 1 | C55326      | 7.0  | 4.00E-45    | 321  | 484  | 288263857 |
| 1 | C58960      | 8.0  | 4.60E-116   | 374  | 708  | 60632109  |
| 1 | C59306      | 7.0  | 3.87E-101   | 380  | 653  | 60634308  |
| 1 | C61334      | 6.0  | 7.72E-112   | 415  | 674  | 56397609  |
| 1 | C64712      | 8.0  | 4.12E-83    | 501  | 708  | 60632109  |
| 1 | C70004      | 5.0  | 1.13E-127   | 768  | 613  | 56275444  |
| 1 | C54848      | 6.0  | 8.36E-105   | 316  | 683  | 86248488  |
| 1 | C56272      | 9.0  | 3.38E-101   | 334  | 674  | 56397609  |
| 1 | C60992      | 7.0  | 2.09E-155   | 409  | 722  | 67567098  |
| 1 | C55626      | 3.0  | 8.62E-105   | 325  | 810  | 60615696  |
| 1 | C57928      | 7.0  | 7.95E-127   | 357  | 722  | 67567098  |
| 1 | C61518      | 6.0  | 7.02E-140   | 419  | 582  | 60635076  |
| 1 | C62432      | 4.0  | 9.31308E-13 | 439  | 748  | 29512960  |
| 1 | C64170      | 7.0  | 1.69E-88    | 484  | 752  | 67565034  |
| 1 | C66916      | 9.0  | 1.20E-46    | 578  | 379  | 302093005 |
| 1 | C66988      | 7.0  | 2.17E-20    | 581  | 502  | 28575075  |
| 1 | scaffold185 | 8.4  | 1.04E-68    | 598  | 650  | 45762149  |
| 1 | C67638      | 10.0 | 2.07E-85    | 610  | 608  | 56272751  |
| 1 | C69098      | 11.0 | 1.10E-133   | 698  | 674  | 56397609  |
| 1 | C66710      | 7.0  | 3.81E-139   | 569  | 708  | 60632109  |
| 1 | C66918      | 8.0  | 0           | 578  | 722  | 67567098  |
| 1 | C70624      | 9.0  | 6.10E-108   | 840  | 742  | 56396150  |
| 1 | C58590      | 8.0  | 2.03E-16    | 368  | 1338 | 82643395  |
| 1 | C59326      | 5.0  | 6.25E-66    | 381  | 751  | 67563076  |
| 1 | C61944      | 9.0  | 8.47E-44    | 428  | 749  | 108837688 |
| 1 | C64022      | 7.0  | 1.38E-36    | 480  | 617  | 84582449  |
| 1 | scaffold56  | 8.1  | 5.38E-74    | 723  | 652  | 60631887  |
| 1 | C72010      | 9.0  | 1.30E-75    | 1065 | 653  | 60634308  |
| 1 | C54300      | 6.0  | 2.86E-58    | 309  | 750  | 60632129  |
| 1 | C60206      | 5.0  | 3.47E-89    | 395  | 689  | 84581459  |
| 1 | C57260      | 12.0 | 1.8427E-13  | 348  | 579  | 120440460 |
| 1 | C62532      | 9.0  | 1.79E-100   | 441  | 784  | 60626460  |
| 1 | C68302      | 12.0 | 3.45E-121   | 644  | 751  | 60635042  |
| 1 | C62302      | 8.0  | 1.38996E-08 | 436  | 561  | 104302307 |
| 1 | C71534      | 8.0  | 9.34E-21    | 970  | 761  | 67567051  |
| 1 | C71784      | 8.0  | 8.13443E-06 | 1019 | 561  | 104302307 |
| 1 | C71928      | 5.0  | 3.85E-17    | 1048 | 761  | 67567051  |
| 1 | C65590      | 9.0  | 1.04385E-06 | 528  | 591  | 60572384  |
| 1 | C53968      | 9.0  | 1.80E-22    | 306  | 406  | 229719654 |
| 1 | C68562      | 16.0 | 1.44E-49    | 662  | 722  | 60436051  |
| 1 | C55260      | 5.0  | 1.47E-75    | 320  | 559  | 18817327  |
| 1 | C59564      | 6.0  | 2.25E-93    | 385  | 596  | 60559847  |
| 1 | C53724      | 4.0  | 3.11E-30    | 303  | 280  | 104297801 |
| 1 | C53994      | 6.0  | 2.17E-37    | 306  | 684  | 60557572  |
| 1 | C58466      | 6.0  | 3.81E-30    | 366  | 280  | 104297801 |

|   |        |      |             |      |     |           |
|---|--------|------|-------------|------|-----|-----------|
| 1 | C59680 | 5.0  | 1.48E-23    | 386  | 402 | 104302202 |
| 1 | C65848 | 6.0  | 5.68E-30    | 537  | 867 | 60574659  |
| 1 | C66990 | 5.0  | 6.16E-30    | 581  | 650 | 60641094  |
| 1 | C72666 | 8.0  | 1.27E-23    | 1258 | 402 | 104302202 |
| 1 | C72680 | 8.0  | 4.65E-17    | 1261 | 402 | 104302202 |
| 1 | C73272 | 6.0  | 6.70E-23    | 1679 | 402 | 104302202 |
| 1 | C73306 | 8.0  | 1.67E-20    | 1723 | 402 | 104302202 |
| 1 | C73570 | 6.0  | 3.52E-22    | 2229 | 402 | 104302202 |
| 1 | C70026 | 6.0  | 3.65E-38    | 770  | 602 | 16319283  |
| 1 | C53324 | 6.0  | 4.80E-29    | 300  | 565 | 21996762  |
| 1 | C55200 | 4.0  | 4.96E-26    | 320  | 457 | 60571251  |
| 1 | C62182 | 7.0  | 1.80E-29    | 433  | 678 | 60436393  |
| 1 | C67392 | 7.0  | 1.23427E-09 | 598  | 732 | 62848659  |
| 1 | C71026 | 7.0  | 2.74E-39    | 898  | 469 | 60522018  |
| 1 | C66378 | 9.0  | 2.71E-41    | 556  | 437 | 104296685 |
| 1 | C54552 | 6.0  | 2.06E-31    | 312  | 697 | 62137004  |
| 1 | C54628 | 4.0  | 8.76E-37    | 312  | 771 | 60622364  |
| 1 | C57312 | 6.0  | 1.70868E-07 | 348  | 578 | 50450655  |
| 1 | C57674 | 8.0  | 6.45E-75    | 353  | 506 | 18819577  |
| 1 | C58430 | 3.0  | 2.62E-37    | 365  | 499 | 18821599  |
| 1 | C59662 | 7.0  | 4.72E-79    | 386  | 688 | 60433306  |
| 1 | C61214 | 4.0  | 1.78E-32    | 413  | 926 | 34408705  |
| 1 | C61958 | 6.0  | 1.91E-35    | 428  | 682 | 60440120  |
| 1 | C63508 | 8.0  | 2.81E-22    | 466  | 506 | 18819577  |
| 1 | C64086 | 3.0  | 1.06255E-15 | 482  | 605 | 60582649  |
| 1 | C65476 | 7.0  | 1.14E-86    | 525  | 506 | 18819577  |
| 1 | C66592 | 53.0 | 4.66E-83    | 564  | 506 | 18819577  |
| 1 | C67284 | 11.0 | 8.48E-17    | 595  | 612 | 60558315  |
| 1 | C68340 | 7.0  | 2.43E-20    | 647  | 456 | 60439057  |
| 1 | C68620 | 32.0 | 9.61E-54    | 666  | 505 | 13548265  |
| 1 | C68882 | 9.0  | 1.03E-93    | 684  | 688 | 60435507  |
| 1 | C70044 | 7.0  | 8.27E-30    | 772  | 651 | 62842110  |
| 1 | C70184 | 59.0 | 6.81E-86    | 785  | 771 | 60622364  |
| 1 | C55218 | 5.0  | 7.74E-25    | 320  | 875 | 46169599  |
| 1 | C58298 | 4.0  | 1.33E-20    | 363  | 603 | 54474630  |
| 1 | C67238 | 5.0  | 4.68E-43    | 592  | 889 | 154637111 |
| 1 | C69002 | 4.0  | 1.25E-71    | 692  | 607 | 31942788  |
| 1 | C68152 | 15.0 | 3.36E-47    | 637  | 789 | 60635271  |
| 1 | C53900 | 6.0  | 1.19E-26    | 305  | 629 | 156184186 |
| 1 | C54202 | 8.0  | 6.63E-16    | 308  | 557 | 60582757  |
| 1 | C54356 | 7.0  | 6.43206E-13 | 310  | 452 | 50688224  |
| 1 | C54988 | 6.0  | 4.91E-26    | 317  | 626 | 62889835  |
| 1 | C55534 | 11.0 | 1.84E-19    | 324  | 666 | 60556663  |
| 1 | C57632 | 5.0  | 1.34E-23    | 353  | 626 | 62889835  |
| 1 | C61288 | 13.0 | 6.28E-23    | 414  | 330 | 157989902 |
| 1 | C69578 | 8.0  | 1.64592E-15 | 734  | 557 | 60582757  |
| 1 | C69962 | 6.0  | 1.65181E-12 | 764  | 165 | 116379049 |
| 1 | C71626 | 8.0  | 2.70E-30    | 990  | 778 | 34407521  |

|   |            |      |             |      |     |           |
|---|------------|------|-------------|------|-----|-----------|
| 1 | C71728     | 6.0  | 9.01852E-15 | 1009 | 761 | 67562876  |
| 1 | C72146     | 8.0  | 7.63E-31    | 1101 | 672 | 60619057  |
| 1 | C72436     | 7.0  | 1.23E-26    | 1179 | 629 | 156184186 |
| 1 | C72630     | 7.0  | 8.34E-28    | 1247 | 748 | 67564722  |
| 1 | C73182     | 7.0  | 3.83E-21    | 1559 | 626 | 62889835  |
| 1 | C73242     | 7.0  | 7.01E-29    | 1630 | 799 | 62846608  |
| 1 | C73292     | 8.0  | 4.36E-24    | 1704 | 629 | 156184186 |
| 1 | C73694     | 8.0  | 7.64E-27    | 2866 | 629 | 156184186 |
| 1 | C55288     | 6.0  | 1.89E-22    | 320  | 699 | 60558914  |
| 1 | scaffold60 | 7.4  | 5.12279E-13 | 931  | 699 | 60558914  |
| 1 | C58084     | 8.0  | 3.36E-58    | 359  | 262 | 45767440  |
| 1 | C63218     | 9.0  | 6.53E-54    | 458  | 262 | 45767440  |
| 1 | C72820     | 10.0 | 8.57E-170   | 1339 | 662 | 60626428  |
| 1 | C70448     | 9.0  | 1.21E-164   | 814  | 782 | 60613336  |
| 1 | C68696     | 9.0  | 1.01E-93    | 671  | 450 | 20429912  |
| 1 | C65306     | 8.0  | 2.46E-112   | 519  | 748 | 60631606  |
| 1 | C69356     | 5.0  | 3.19E-106   | 717  | 721 | 67563446  |
| 1 | C59574     | 7.0  | 6.09E-63    | 385  | 779 | 56398026  |
| 1 | C56078     | 6.0  | 1.81E-16    | 331  | 751 | 62848051  |
| 1 | C68816     | 5.0  | 2.20166E-08 | 680  | 888 | 84586283  |
| 1 | C54952     | 8.0  | 1.87E-22    | 317  | 650 | 60641094  |
| 1 | C58846     | 4.0  | 1.53E-29    | 372  | 732 | 62848659  |
| 1 | C59760     | 6.0  | 7.55886E-07 | 387  | 111 | 67567690  |
| 1 | C62744     | 4.0  | 1.53519E-14 | 446  | 111 | 67567690  |
| 1 | C66542     | 3.0  | 3.04659E-13 | 563  | 111 | 67567690  |
| 1 | C68764     | 9.0  | 6.70E-24    | 677  | 655 | 50523853  |
| 1 | C71974     | 49.0 | 1.72E-25    | 1060 | 655 | 50523853  |
| 1 | C72004     | 9.0  | 5.65554E-10 | 1064 | 111 | 67567690  |
| 1 | C67272     | 9.0  | 2.23E-20    | 594  | 484 | 50633323  |
| 1 | C61938     | 4.0  | 9.42E-16    | 428  | 716 | 60437339  |
| 1 | C73114     | 7.0  | 3.88E-24    | 1519 | 949 | 34413183  |
| 1 | C64902     | 10.0 | 1.24E-132   | 507  | 801 | 60626147  |
| 1 | C54636     | 8.0  | 3.86025E-08 | 313  | 791 | 23707203  |
| 1 | C71734     | 9.0  | 2.37E-18    | 1009 | 422 | 8908788   |
| 1 | C60352     | 8.0  | 2.04113E-10 | 397  | 778 | 23289516  |
| 1 | C68482     | 10.0 | 2.12124E-08 | 656  | 406 | 8907317   |
| 1 | C62400     | 4.0  | 1.50622E-14 | 438  | 719 | 60637874  |
| 1 | C69986     | 9.0  | 4.19188E-13 | 766  | 671 | 60437101  |
| 1 | C65044     | 5.0  | 2.97E-19    | 511  | 563 | 84129686  |
| 1 | C66650     | 6.0  | 1.31E-18    | 566  | 531 | 183028217 |
| 1 | C66782     | 5.0  | 5.25E-55    | 572  | 850 | 84588792  |
| 1 | C71854     | 5.0  | 8.93E-49    | 1029 | 546 | 60513747  |
| 1 | C73486     | 45.0 | 8.28E-134   | 2028 | 792 | 84583450  |
| 1 | C73380     | 10.0 | 2.57822E-13 | 1833 | 669 | 56274988  |
| 1 | C68486     | 6.0  | 6.48E-24    | 656  | 371 | 48724141  |
| 1 | C72156     | 10.0 | 9.15985E-09 | 1103 | 631 | 28289954  |
| 1 | C73614     | 9.0  | 3.89E-25    | 2369 | 277 | 60625579  |
| 1 | C65104     | 6.0  | 1.70521E-11 | 513  | 521 | 83488801  |

|   |             |      |             |      |      |           |
|---|-------------|------|-------------|------|------|-----------|
| 1 | C66488      | 11.0 | 7.66786E-14 | 560  | 702  | 29258978  |
| 1 | scaffold45  | 6.5  | 1.63198E-08 | 510  | 547  | 49340311  |
| 1 | C65258      | 9.0  | 7.34E-17    | 518  | 748  | 62839521  |
| 1 | C55082      | 11.0 | 1.80E-19    | 318  | 851  | 119683006 |
| 1 | C73042      | 6.0  | 9.17E-22    | 1474 | 566  | 86224623  |
| 1 | C72734      | 5.0  | 1.73938E-10 | 1288 | 864  | 75787908  |
| 1 | C67452      | 5.0  | 1.62E-30    | 601  | 457  | 60571251  |
| 1 | C64504      | 6.0  | 1.01103E-09 | 494  | 719  | 40401817  |
| 1 | C58446      | 4.0  | 4.55005E-08 | 365  | 307  | 86233888  |
| 1 | C66358      | 9.0  | 4.86598E-15 | 555  | 614  | 74363469  |
| 1 | C72294      | 10.0 | 4.04037E-14 | 1141 | 653  | 60433803  |
| 1 | C73000      | 5.0  | 3.05027E-09 | 1444 | 129  | 178616792 |
| 1 | C53726      | 5.0  | 4.68E-26    | 303  | 579  | 60560824  |
| 1 | C70196      | 10.0 | 6.72026E-12 | 786  | 604  | 282744375 |
| 1 | C72978      | 9.0  | 1.34E-17    | 1436 | 740  | 60437760  |
| 1 | C71764      | 5.0  | 5.18442E-07 | 1014 | 556  | 81200863  |
| 1 | C62676      | 5.0  | 1.52795E-14 | 444  | 667  | 183025254 |
| 1 | C72402      | 9.0  | 6.24228E-10 | 1172 | 272  | 20431398  |
| 1 | C70960      | 6.0  | 1.14663E-07 | 889  | 529  | 19695691  |
| 1 | C73660      | 10.0 | 5.69813E-12 | 2585 | 774  | 31892390  |
| 1 | C58860      | 9.0  | 1.22379E-11 | 373  | 672  | 40412790  |
| 1 | C55434      | 4.0  | 6.45181E-10 | 322  | 684  | 29399077  |
| 1 | C66940      | 5.0  | 1.8632E-08  | 579  | 387  | 59826354  |
| 1 | C72164      | 7.0  | 7.15E-62    | 1105 | 578  | 60557987  |
| 1 | C73080      | 8.0  | 4.95625E-08 | 1502 | 585  | 13309224  |
| 1 | C69750      | 9.0  | 2.42283E-08 | 746  | 293  | 305635912 |
| 1 | scaffold152 | 7.3  | 5.22434E-13 | 949  | 583  | 60586208  |
| 1 | C72380      | 5.0  | 1.08E-17    | 1164 | 180  | 60639146  |
| 1 | C56340      | 5.0  | 3.20E-24    | 334  | 628  | 282723254 |
| 1 | C66544      | 8.0  | 9.67E-32    | 563  | 652  | 60561155  |
| 1 | C66662      | 5.0  | 5.17E-18    | 567  | 586  | 157989590 |
| 1 | C55168      | 6.0  | 1.12E-17    | 319  | 738  | 45765625  |
| 1 | C63024      | 5.0  | 5.9374E-11  | 453  | 534  | 8273999   |
| 1 | C65052      | 5.0  | 5.00E-24    | 511  | 928  | 23702215  |
| 1 | C69744      | 7.0  | 1.60945E-12 | 745  | 611  | 178588315 |
| 1 | C70486      | 5.0  | 1.09313E-10 | 818  | 799  | 62837558  |
| 1 | C59426      | 6.0  | 1.20866E-08 | 382  | 805  | 46174282  |
| 1 | C72092      | 10.0 | 5.77506E-10 | 1086 | 693  | 60561524  |
| 1 | C57784      | 55.0 | 7.16151E-10 | 355  | 620  | 60559538  |
| 1 | C57850      | 6.0  | 6.91688E-07 | 356  | 693  | 76047314  |
| 1 | C73416      | 9.0  | 3.11E-25    | 1901 | 820  | 282754755 |
| 1 | C55732      | 4.0  | 6.78939E-13 | 326  | 584  | 288238414 |
| 1 | C61076      | 5.0  | 3.56471E-15 | 411  | 223  | 114758498 |
| 1 | C62244      | 6.0  | 1.49536E-14 | 435  | 734  | 54530162  |
| 1 | scaffold78  | 5.0  | 1.79569E-11 | 539  | 629  | 119228810 |
| 1 | C72516      | 10.0 | 1.08661E-14 | 1211 | 348  | 282749630 |
| 1 | C56160      | 5.0  | 4.43484E-14 | 332  | 775  | 84582938  |
| 1 | C57420      | 4.0  | 3.24E-21    | 350  | 1033 | 23695195  |

|   |             |      |             |      |      |           |
|---|-------------|------|-------------|------|------|-----------|
| 1 | scaffold193 | 7.0  | 8.16E-17    | 573  | 678  | 60436975  |
| 1 | C72716      | 10.0 | 5.27E-26    | 1278 | 696  | 60564770  |
| 1 | C70162      | 9.0  | 4.12893E-10 | 783  | 157  | 104297306 |
| 1 | C70190      | 9.0  | 4.64E-19    | 786  | 696  | 60564770  |
| 1 | C62162      | 5.0  | 1.07E-24    | 433  | 808  | 23707850  |
| 1 | C61642      | 6.0  | 9.28E-16    | 422  | 488  | 60440267  |
| 1 | C62010      | 8.0  | 9.80E-19    | 429  | 758  | 34409494  |
| 1 | C64680      | 4.0  | 4.0456E-09  | 500  | 443  | 77992502  |
| 1 | C67862      | 8.0  | 2.33E-20    | 620  | 484  | 50633323  |
| 1 | C62226      | 6.0  | 9.92E-19    | 434  | 654  | 54502201  |
| 1 | C63238      | 4.0  | 2.47012E-13 | 459  | 570  | 60565684  |
| 1 | C61688      | 6.0  | 8.30439E-07 | 423  | 721  | 76555249  |
| 1 | C56290      | 4.0  | 1.76356E-13 | 334  | 273  | 60636262  |
| 1 | C67502      | 9.0  | 9.63E-26    | 603  | 479  | 84587058  |
| 1 | C70366      | 8.0  | 1.20E-19    | 804  | 664  | 60541004  |
| 1 | C68862      | 7.0  | 8.752E-08   | 684  | 612  | 50675248  |
| 1 | C69022      | 60.0 | 5.47196E-06 | 693  | 613  | 15183948  |
| 1 | C61282      | 5.0  | 1.06E-27    | 414  | 753  | 62143727  |
| 1 | C62722      | 5.0  | 2.48E-16    | 445  | 527  | 18817175  |
| 1 | C61866      | 4.0  | 1.01E-21    | 426  | 730  | 282754221 |
| 1 | C64358      | 8.0  | 6.92E-17    | 490  | 702  | 282725793 |
| 1 | C64498      | 8.0  | 3.09E-25    | 494  | 592  | 62851340  |
| 1 | C70086      | 9.0  | 5.74E-37    | 775  | 730  | 282754221 |
| 1 | C73108      | 9.0  | 5.05E-45    | 1518 | 465  | 282734047 |
| 1 | C56466      | 6.0  | 1.05422E-08 | 336  | 548  | 60558754  |
| 1 | C58986      | 6.0  | 7.59163E-10 | 375  | 702  | 60441321  |
| 1 | C62170      | 10.0 | 9.53E-16    | 433  | 370  | 119276610 |
| 1 | C65358      | 8.0  | 6.59379E-08 | 521  | 851  | 288236892 |
| 1 | C65394      | 8.0  | 6.93E-48    | 523  | 716  | 282756139 |
| 1 | C69918      | 7.0  | 3.85562E-07 | 760  | 113  | 60629659  |
| 1 | C71814      | 6.0  | 1.42791E-13 | 1023 | 403  | 282760188 |
| 1 | C72342      | 11.0 | 4.58E-23    | 1155 | 520  | 282724317 |
| 1 | C58124      | 6.0  | 1.83974E-10 | 360  | 946  | 34410000  |
| 1 | C73520      | 52.0 | 7.29E-48    | 2106 | 625  | 60616748  |
| 1 | C64758      | 7.0  | 8.28E-29    | 503  | 652  | 60438108  |
| 1 | C66008      | 6.0  | 1.80613E-11 | 542  | 713  | 84581727  |
| 1 | C70880      | 5.0  | 6.03E-31    | 875  | 477  | 60636173  |
| 1 | C72862      | 5.0  | 2.23E-25    | 1364 | 810  | 282755911 |
| 1 | C60568      | 3.0  | 3.10115E-06 | 401  | 489  | 7841767   |
| 1 | C61992      | 10.0 | 5.60678E-11 | 429  | 752  | 62139474  |
| 1 | C69032      | 10.0 | 7.70E-33    | 694  | 672  | 60555287  |
| 1 | C59626      | 4.0  | 1.72E-35    | 386  | 625  | 60616748  |
| 1 | C58588      | 5.0  | 8.02E-16    | 368  | 682  | 62850827  |
| 1 | C55854      | 6.0  | 1.66556E-10 | 328  | 735  | 54536530  |
| 1 | C71122      | 9.0  | 7.82122E-12 | 911  | 731  | 282759073 |
| 1 | C71530      | 9.0  | 1.95541E-06 | 969  | 1237 | 199584710 |
| 1 | C55578      | 4.0  | 6.27489E-07 | 325  | 559  | 32000872  |
| 1 | C67014      | 11.0 | 2.92441E-07 | 582  | 544  | 20430286  |

|   |             |      |             |      |     |           |
|---|-------------|------|-------------|------|-----|-----------|
| 1 | C62514      | 5.0  | 2.55E-19    | 441  | 637 | 60559835  |
| 1 | C55630      | 5.0  | 2.99E-21    | 325  | 516 | 18822515  |
| 1 | C60880      | 6.0  | 5.72E-17    | 407  | 779 | 74261518  |
| 1 | C68306      | 8.0  | 4.56E-34    | 644  | 751 | 56270157  |
| 1 | C68610      | 4.0  | 4.06E-22    | 665  | 751 | 56270157  |
| 1 | C69226      | 6.0  | 3.7106E-10  | 706  | 679 | 68285846  |
| 1 | C73274      | 9.0  | 3.08E-34    | 1680 | 716 | 282756139 |
| 1 | C56206      | 5.0  | 9.39E-37    | 333  | 640 | 62144031  |
| 1 | C60262      | 4.0  | 5.54E-17    | 395  | 734 | 54503899  |
| 1 | C68740      | 6.0  | 1.12E-28    | 674  | 898 | 148752116 |
| 1 | C69086      | 49.0 | 3.29E-38    | 697  | 555 | 50435963  |
| 1 | C64214      | 6.0  | 2.82E-19    | 486  | 640 | 62144031  |
| 1 | C64992      | 7.0  | 7.21E-17    | 509  | 709 | 282723543 |
| 1 | C72234      | 10.0 | 5.74419E-07 | 1121 | 580 | 83082001  |
| 1 | C63676      | 5.0  | 1.08E-18    | 471  | 654 | 282757066 |
| 1 | C72834      | 8.0  | 1.16526E-11 | 1346 | 311 | 282760362 |
| 1 | scaffold236 | 8.0  | 1.41E-56    | 933  | 387 | 282759583 |
| 1 | C55522      | 4.0  | 3.10E-24    | 324  | 765 | 75879166  |
| 1 | C67324      | 5.0  | 1.54E-27    | 596  | 761 | 59790528  |
| 1 | C69668      | 9.0  | 6.08112E-09 | 740  | 677 | 282754938 |
| 1 | C70768      | 8.0  | 1.07E-41    | 859  | 625 | 60616748  |
| 1 | C68928      | 7.0  | 2.30726E-11 | 686  | 626 | 62141324  |
| 1 | C56812      | 8.0  | 1.67199E-07 | 341  | 813 | 282742723 |
| 1 | C70776      | 10.0 | 5.37E-96    | 860  | 512 | 18821012  |
| 1 | C72212      | 10.0 | 4.26E-20    | 1117 | 946 | 34410000  |
| 1 | C65150      | 6.0  | 4.01004E-06 | 514  | 732 | 31002593  |
| 1 | C66104      | 9.0  | 4.77451E-15 | 545  | 822 | 282754533 |
| 1 | C70164      | 8.0  | 2.6483E-11  | 784  | 618 | 62888887  |
| 1 | C57368      | 8.0  | 2.99656E-15 | 349  | 488 | 183050530 |
| 1 | C63492      | 6.0  | 1.94E-29    | 466  | 589 | 282746884 |
| 1 | C65202      | 5.0  | 8.50E-29    | 516  | 544 | 60561327  |
| 1 | C69036      | 9.0  | 8.88441E-08 | 694  | 541 | 83457064  |
| 1 | C59486      | 5.0  | 1.41E-20    | 383  | 387 | 282759583 |
| 1 | C58902      | 6.0  | 2.22E-22    | 373  | 761 | 59790528  |
| 1 | C71968      | 7.0  | 4.19E-23    | 1059 | 255 | 104302143 |
| 1 | C71406      | 10.0 | 1.91407E-06 | 949  | 789 | 23696779  |
| 1 | C65918      | 6.0  | 1.1945E-15  | 539  | 905 | 23707849  |
| 1 | C62286      | 7.0  | 3.65324E-12 | 436  | 493 | 282738885 |
| 1 | C60602      | 7.0  | 2.01E-44    | 402  | 801 | 23704872  |
| 1 | C60036      | 5.0  | 5.09707E-11 | 392  | 672 | 60437676  |
| 1 | C70580      | 7.0  | 5.12E-22    | 833  | 628 | 67563653  |
| 1 | scaffold249 | 4.8  | 7.81779E-10 | 1462 | 571 | 50579235  |
| 1 | C66528      | 9.0  | 2.81978E-07 | 562  | 626 | 34169446  |
| 1 | C73162      | 11.0 | 8.92E-16    | 1546 | 822 | 148279529 |
| 1 | C53860      | 4.0  | 8.55E-37    | 305  | 401 | 60516426  |
| 1 | C53862      | 56.0 | 3.51E-39    | 305  | 401 | 60516426  |
| 1 | C55136      | 55.0 | 6.63306E-13 | 319  | 419 | 60514839  |
| 1 | C55192      | 4.0  | 6.63306E-13 | 319  | 419 | 60514839  |



|   |                 |             |      |     |           |
|---|-----------------|-------------|------|-----|-----------|
| 1 | C55466 37.0     | 6.05E-41    | 323  | 839 | 84585402  |
| 1 | C56996 4.0      | 4.47E-48    | 344  | 525 | 60514129  |
| 1 | C57158 4.0      | 9.08E-31    | 346  | 839 | 84585402  |
| 1 | C58304 55.0     | 5.51E-60    | 363  | 401 | 60516426  |
| 1 | C62812 4.0      | 2.90E-28    | 447  | 738 | 213483311 |
| 1 | C63250 55.0     | 1.98E-32    | 459  | 401 | 60516426  |
| 1 | C63802 58.0     | 4.33E-55    | 474  | 551 | 60516699  |
| 1 | C65112 60.0     | 4.19E-46    | 513  | 525 | 60514129  |
| 1 | C66730 5.0      | 7.52125E-11 | 570  | 700 | 60626175  |
| 1 | C68032 58.0     | 2.30E-54    | 630  | 551 | 60516699  |
| 1 | C68224 58.0     | 5.70E-52    | 641  | 839 | 84585402  |
| 1 | C72200 61.0     | 3.86E-85    | 1114 | 457 | 18821131  |
| 1 | C73640 53.0     | 8.49E-119   | 2504 | 407 | 60518838  |
| 1 | C69740 6.0      | 2.28E-76    | 745  | 575 | 18817122  |
| 1 | C71600 6.0      | 6.84E-68    | 982  | 874 | 84584654  |
| 1 | C72900 6.0      | 0           | 1382 | 691 | 62134052  |
| 1 | C66198 5.0      | 0           | 549  | 652 | 50437781  |
| 1 | C54362 5.0      | 9.31102E-06 | 310  | 335 | 282736064 |
| 1 | C56972 3.0      | 3.70E-33    | 344  | 475 | 60440763  |
| 1 | C58212 6.0      | 2.78204E-06 | 362  | 894 | 34407989  |
| 1 | C67128 5.0      | 2.20E-20    | 588  | 742 | 119679084 |
| 1 | C72484 5.0      | 1.12E-17    | 1198 | 633 | 51549664  |
| 1 | C72700 9.0      | 3.12E-21    | 1272 | 633 | 51549664  |
| 1 | C73126 11.0     | 2.69E-31    | 1527 | 810 | 282755911 |
| 1 | C55350 7.0      | 1.97E-25    | 321  | 841 | 282752660 |
| 1 | C55740 6.0      | 1.23E-23    | 326  | 617 | 60637083  |
| 1 | C56598 4.0      | 1.85E-16    | 338  | 751 | 30983371  |
| 1 | C56680 5.0      | 7.07973E-13 | 339  | 652 | 60561155  |
| 1 | C56818 8.0      | 2.61021E-06 | 341  | 461 | 60719743  |
| 1 | C57102 7.0      | 2.64294E-06 | 345  | 209 | 162285837 |
| 1 | C57730 6.0      | 2.71658E-06 | 354  | 544 | 83121497  |
| 1 | C59154 6.0      | 2.94E-43    | 378  | 511 | 282757412 |
| 1 | C60798 7.0      | 2.08468E-10 | 405  | 758 | 282753432 |
| 1 | C62110 8.0      | 7.36E-32    | 432  | 448 | 60508633  |
| 1 | C62522 6.0      | 3.99E-18    | 441  | 349 | 5546949   |
| 1 | C65132 5.0      | 8.86E-69    | 514  | 730 | 60640953  |
| 1 | C65584 6.0      | 1.04385E-06 | 528  | 720 | 60441151  |
| 1 | C65868 8.0      | 4.24E-43    | 538  | 788 | 282731911 |
| 1 | C66726 7.0      | 4.8178E-12  | 570  | 612 | 282723291 |
| 1 | C66828 7.0      | 1.48E-27    | 574  | 731 | 282738250 |
| 1 | C66842 8.0      | 1.73E-39    | 574  | 724 | 62839303  |
| 1 | C66942 10.0     | 5.28E-18    | 579  | 577 | 60638928  |
| 1 | C67096 8.0      | 1.83E-42    | 586  | 946 | 34410000  |
| 1 | C67546 8.0      | 9.31E-23    | 605  | 711 | 62835176  |
| 1 | C67650 11.0     | 1.52E-24    | 611  | 808 | 23704870  |
| 1 | scaffold168 9.4 | 5.31103E-12 | 626  | 754 | 51881419  |
| 1 | scaffold10 4.0  | 5.35507E-12 | 631  | 617 | 60637083  |
| 1 | C68250 4.0      | 6.34E-24    | 642  | 472 | 21550046  |

|   |             |      |             |      |     |           |
|---|-------------|------|-------------|------|-----|-----------|
| 1 | C68304      | 13.0 | 8.60E-48    | 644  | 537 | 282723552 |
| 1 | C68500      | 9.0  | 9.40E-17    | 657  | 580 | 18817874  |
| 1 | C68856      | 8.0  | 4.50E-28    | 683  | 387 | 282759583 |
| 1 | C68890      | 8.0  | 7.59E-33    | 685  | 697 | 60435036  |
| 1 | scaffold200 | 7.8  | 5.46E-40    | 712  | 511 | 282757412 |
| 1 | C69318      | 6.0  | 6.0773E-12  | 713  | 812 | 74361243  |
| 1 | C70244      | 6.0  | 1.01687E-07 | 791  | 638 | 15911811  |
| 1 | C70956      | 10.0 | 8.54E-21    | 889  | 855 | 34414544  |
| 1 | C71038      | 9.0  | 8.72E-58    | 900  | 725 | 34409433  |
| 1 | C71066      | 9.0  | 9.72E-30    | 903  | 508 | 20430560  |
| 1 | scaffold191 | 9.1  | 2.18298E-15 | 966  | 526 | 74368314  |
| 1 | C71608      | 10.0 | 1.86E-37    | 984  | 185 | 282725291 |
| 1 | C71648      | 5.0  | 1.28831E-07 | 996  | 786 | 62834852  |
| 1 | C72012      | 8.0  | 3.49183E-08 | 1065 | 872 | 34413975  |
| 1 | C72278      | 9.0  | 1.5864E-13  | 1134 | 533 | 282733423 |
| 1 | C73298      | 46.0 | 2.51E-16    | 1713 | 750 | 60635400  |
| 1 | C73436      | 10.0 | 1.30E-27    | 1940 | 641 | 104296258 |
| 1 | C53372      | 5.0  | 6.90E-167   | 300  | 675 | 84581729  |
| 1 | C65342      | 7.0  | 4.22371E-09 | 521  | 554 | 282739631 |
| 1 | C53888      | 4.0  | 1.12E-94    | 305  | 720 | 62848714  |
| 1 | C67828      | 5.0  | 2.32E-20    | 619  | 451 | 19690633  |
| 1 | C69026      | 5.0  | 1.04E-56    | 694  | 704 | 24810808  |
| 1 | C69682      | 5.0  | 2.52E-48    | 741  | 778 | 28280137  |
| 1 | C62158      | 9.0  | 2.23708E-10 | 433  | 638 | 60524354  |
| 1 | C60786      | 4.0  | 2.02E-44    | 405  | 559 | 83508837  |
| 1 | C69616      | 5.0  | 4.90E-65    | 737  | 471 | 80893274  |
| 1 | C70258      | 5.0  | 3.76E-38    | 793  | 704 | 24810808  |
| 1 | C57984      | 5.0  | 2.85509E-09 | 358  | 584 | 50517054  |
| 1 | C69438      | 7.0  | 3.94364E-13 | 722  | 618 | 32272727  |
| 1 | C58700      | 6.0  | 7.77207E-13 | 370  | 767 | 74371800  |
| 1 | C63308      | 10.0 | 9.44115E-10 | 461  | 528 | 84123343  |
| 1 | C61746      | 6.0  | 9.05E-50    | 424  | 536 | 81276811  |
| 1 | C60578      | 5.0  | 1.32141E-11 | 401  | 486 | 50433427  |
| 1 | C64160      | 7.0  | 1.54485E-08 | 484  | 590 | 12371705  |
| 1 | C67798      | 7.0  | 5.86E-21    | 617  | 856 | 90230938  |
| 1 | C70682      | 8.0  | 7.53678E-15 | 847  | 847 | 82817305  |
| 1 | C63984      | 9.0  | 1.72E-17    | 479  | 261 | 18982090  |
| 1 | C73316      | 9.0  | 2.35643E-10 | 1741 | 558 | 50641816  |
| 1 | scaffold181 | 8.3  | 3.20E-17    | 876  | 561 | 68325227  |
| 1 | C62644      | 7.0  | 3.58586E-09 | 444  | 698 | 60558484  |
| 1 | C66776      | 5.0  | 6.06E-30    | 572  | 718 | 62133031  |
| 1 | C62640      | 9.0  | 1.41682E-08 | 444  | 719 | 112765394 |
| 1 | C67688      | 8.0  | 2.05321E-11 | 613  | 248 | 1986089   |
| 1 | C68530      | 8.0  | 1.93E-73    | 659  | 416 | 2054152   |
| 1 | scaffold115 | 5.8  | 3.58E-28    | 549  | 456 | 26593927  |
| 1 | C59238      | 4.0  | 7.67766E-10 | 379  | 871 | 51887221  |
| 1 | C68462      | 8.0  | 8.35478E-08 | 654  | 466 | 83532002  |
| 1 | C59242      | 8.0  | 3.42E-55    | 379  | 814 | 112212336 |

|   |             |      |             |      |     |           |
|---|-------------|------|-------------|------|-----|-----------|
| 1 | C54340      | 5.0  | 9.00E-40    | 309  | 398 | 10096673  |
| 1 | C68654      | 5.0  | 6.36E-21    | 668  | 792 | 295141839 |
| 1 | C63990      | 7.0  | 6.79E-17    | 479  | 561 | 78754941  |
| 1 | C63338      | 6.0  | 4.03206E-15 | 462  | 403 | 182550396 |
| 1 | C68238      | 9.0  | 3.62E-16    | 641  | 661 | 84125986  |
| 1 | C64950      | 7.0  | 3.96104E-06 | 508  | 541 | 10908781  |
| 1 | C73050      | 10.0 | 3.0096E-06  | 1479 | 266 | 9007846   |
| 1 | C68142      | 6.0  | 2.30E-17    | 636  | 603 | 282734033 |
| 1 | C61950      | 9.0  | 2.81E-102   | 428  | 636 | 50453538  |
| 1 | C53416      | 5.0  | 3.61E-79    | 300  | 443 | 50440720  |
| 1 | C54788      | 5.0  | 4.22E-51    | 315  | 443 | 50440720  |
| 1 | C70364      | 9.0  | 1.74097E-12 | 804  | 375 | 2161279   |
| 1 | C68132      | 5.0  | 4.99826E-06 | 635  | 623 | 56201124  |
| 1 | scaffold61  | 5.2  | 3.91797E-12 | 466  | 365 | 9881863   |
| 1 | scaffold276 | 8.4  | 3.20E-16    | 2184 | 490 | 27844795  |
| 1 | C67224      | 6.0  | 5.2044E-15  | 592  | 329 | 60439037  |
| 1 | C66282      | 5.0  | 8.15E-20    | 552  | 510 | 19758575  |
| 1 | C73210      | 10.0 | 4.22E-27    | 1591 | 812 | 108889247 |
| 1 | C53812      | 7.0  | 1.55E-47    | 304  | 440 | 60506954  |
| 1 | C72706      | 8.0  | 4.88E-20    | 1274 | 628 | 67563653  |
| 1 | C73558      | 10.0 | 8.17E-17    | 2206 | 524 | 50639467  |
| 1 | C58882      | 5.0  | 2.98255E-09 | 373  | 391 | 8609972   |
| 1 | C61662      | 7.0  | 0           | 422  | 806 | 60452417  |
| 1 | C56222      | 9.0  | 4.2843E-11  | 333  | 445 | 272528    |
| 1 | C71382      | 8.0  | 1.14E-38    | 947  | 496 | 60578525  |
| 1 | C70320      | 8.0  | 1.72983E-12 | 799  | 514 | 104300644 |
| 1 | C72268      | 10.0 | 9.04098E-06 | 1130 | 771 | 13334467  |
| 1 | C60386      | 4.0  | 7.78666E-07 | 398  | 727 | 219660191 |
| 1 | C61056      | 9.0  | 8.34434E-10 | 410  | 413 | 104297892 |
| 1 | C73496      | 7.0  | 1.06E-43    | 2042 | 680 | 60607532  |
| 1 | C66570      | 9.0  | 0           | 564  | 632 | 62888779  |
| 1 | C56124      | 7.0  | 1.1188E-14  | 331  | 556 | 82056436  |
| 1 | C71420      | 9.0  | 5.44E-16    | 952  | 176 | 182831302 |
| 1 | C68988      | 9.0  | 6.59E-21    | 691  | 238 | 5511402   |
| 1 | C66690      | 8.0  | 7.55E-48    | 568  | 332 | 7848324   |
| 1 | C65888      | 6.0  | 1.06452E-06 | 538  | 759 | 57718503  |
| 1 | C61484      | 8.0  | 5.88E-17    | 418  | 718 | 62844540  |
| 1 | C54096      | 4.0  | 9.21403E-06 | 307  | 292 | 60525045  |
| 1 | C67764      | 9.0  | 6.07E-24    | 616  | 524 | 14344329  |
| 1 | C56324      | 7.0  | 1.04751E-08 | 334  | 798 | 77213783  |
| 1 | C60112      | 9.0  | 1.94454E-07 | 393  | 573 | 80934884  |
| 1 | C60192      | 10.0 | 6.98E-72    | 394  | 772 | 84589540  |
| 1 | C65740      | 10.0 | 1.32E-24    | 533  | 625 | 24727431  |
| 1 | C53570      | 7.0  | 1.51E-155   | 302  | 445 | 50637428  |
| 1 | C69454      | 6.0  | 5.93694E-09 | 723  | 558 | 10868665  |
| 1 | C71308      | 8.0  | 8.34168E-15 | 935  | 805 | 51881601  |
| 1 | C72638      | 9.0  | 1.75204E-13 | 1250 | 233 | 7947441   |
| 1 | C72672      | 10.0 | 2.65315E-09 | 1259 | 676 | 62849115  |

|   |        |      |             |      |     |           |
|---|--------|------|-------------|------|-----|-----------|
| 1 | C69924 | 10.0 | 4.0094E-10  | 761  | 545 | 77950380  |
| 1 | C63928 | 9.0  | 1.99E-29    | 478  | 590 | 50278056  |
| 1 | C65732 | 6.0  | 7.0125E-11  | 533  | 861 | 11155596  |
| 1 | C68932 | 6.0  | 2.22512E-08 | 687  | 680 | 149943195 |
| 1 | C68936 | 8.0  | 1.42532E-09 | 687  | 306 | 7954996   |
| 1 | C67136 | 7.0  | 9.53E-100   | 588  | 840 | 10934744  |
| 1 | C71662 | 7.0  | 8.26083E-09 | 997  | 540 | 83505506  |
| 1 | C71480 | 5.0  | 8.2528E-12  | 960  | 804 | 77205056  |
| 1 | C55812 | 7.0  | 1.86E-19    | 327  | 237 | 14433994  |
| 1 | C72224 | 10.0 | 8.82E-114   | 1119 | 607 | 160508121 |
| 1 | C55504 | 8.0  | 1.57765E-07 | 323  | 569 | 82062700  |
| 1 | C70796 | 8.0  | 2.53E-36    | 863  | 524 | 83494740  |
| 1 | C71330 | 9.0  | 1.42E-56    | 938  | 544 | 83437273  |
| 1 | C72086 | 9.0  | 6.96E-25    | 1084 | 218 | 12349328  |
| 1 | C65496 | 7.0  | 1.11904E-12 | 525  | 569 | 60591752  |
| 1 | C62148 | 10.0 | 8.49078E-07 | 432  | 656 | 288260990 |
| 1 | C71912 | 8.0  | 1.35186E-07 | 1044 | 198 | 8112680   |
| 1 | C71612 | 8.0  | 2.22928E-15 | 986  | 573 | 77941560  |
| 1 | C72732 | 5.0  | 3.04E-18    | 1287 | 553 | 78560871  |
| 1 | C71830 | 9.0  | 5.2472E-07  | 1026 | 658 | 57721644  |
| 1 | C62916 | 9.0  | 1.49225E-11 | 450  | 758 | 34477569  |
| 1 | C56908 | 9.0  | 4.25821E-08 | 343  | 423 | 288289888 |
| 1 | C69912 | 8.0  | 0           | 759  | 602 | 50532973  |
| 1 | C70232 | 9.0  | 4.33293E-13 | 791  | 352 | 570833    |
| 1 | C58260 | 4.0  | 1.92183E-13 | 362  | 732 | 62141073  |
| 1 | C62754 | 6.0  | 8.7807E-07  | 446  | 587 | 19620081  |
| 1 | C69344 | 4.0  | 9.1757E-08  | 716  | 774 | 269804351 |
| 1 | C72416 | 8.0  | 5.22E-32    | 1175 | 280 | 104297801 |
| 1 | C72518 | 9.0  | 2.39E-40    | 1213 | 646 | 114725157 |
| 1 | C69392 | 9.0  | 9.57E-11    | 719  | 811 | 15255878  |
| 1 | C69040 | 7.0  | 1.69E-58    | 695  | 732 | 302086846 |
| 1 | C72084 | 9.0  | 6.96E-25    | 1084 | 404 | 229652156 |
| 1 | C68466 | 9.0  | 1.52E-18    | 655  | 452 | 77992687  |
| 1 | C61930 | 6.0  | 2.12799E-07 | 428  | 476 | 90935545  |
| 1 | C61104 | 4.0  | 3.18298E-06 | 411  | 947 | 160515428 |
| 1 | C70340 | 9.0  | 1.16E-16    | 802  | 646 | 60556714  |
| 1 | C58672 | 8.0  | 9.08E-62    | 369  | 571 | 29208743  |
| 1 | C69782 | 5.0  | 6.38557E-12 | 748  | 537 | 19609055  |
| 1 | C71374 | 9.0  | 1.15E-75    | 945  | 607 | 60624621  |
| 1 | C58464 | 5.0  | 2.81477E-06 | 366  | 591 | 83232158  |
| 1 | C58436 | 5.0  | 3.42E-58    | 365  | 603 | 282734033 |
| 1 | C56168 | 7.0  | 1.36E-29    | 332  | 708 | 60634151  |
| 1 | C57668 | 7.0  | 6.85475E-07 | 353  | 778 | 108900686 |
| 1 | C59116 | 7.0  | 1.20E-45    | 377  | 693 | 1307555   |
| 1 | C70480 | 5.0  | 1.64122E-06 | 817  | 736 | 62848028  |
| 1 | C57002 | 5.0  | 6.66837E-07 | 344  | 808 | 68422475  |
| 1 | C60472 | 4.0  | 3.08479E-06 | 399  | 721 | 60560370  |
| 1 | C73630 | 9.0  | 1.35374E-12 | 2428 | 465 | 1229468   |

|   |             |      |             |      |     |           |
|---|-------------|------|-------------|------|-----|-----------|
| 1 | C65542      | 7.0  | 4.2746E-09  | 527  | 433 | 6399941   |
| 1 | C72182      | 9.0  | 2.26E-43    | 1109 | 816 | 62844105  |
| 1 | C66416      | 10.0 | 1.28E-18    | 557  | 575 | 213480061 |
| 1 | C63052      | 9.0  | 3.42E-40    | 453  | 549 | 207907988 |
| 1 | C73008      | 9.0  | 3.05671E-09 | 1447 | 836 | 59777337  |
| 1 | C73422      | 8.0  | 3.89728E-06 | 1913 | 639 | 282732458 |
| 1 | C73534      | 9.0  | 7.33945E-11 | 2137 | 493 | 3222962   |
| 1 | C67670      | 7.0  | 6.76E-33    | 612  | 638 | 60524050  |
| 1 | scaffold46  | 7.5  | 6.87E-23    | 451  | 501 | 27837098  |
| 1 | C63296      | 7.0  | 3.58392E-06 | 460  | 863 | 288272239 |
| 1 | C56816      | 6.0  | 2.81494E-12 | 341  | 567 | 83431990  |
| 1 | C60154      | 5.0  | 3.04388E-06 | 394  | 558 | 10870741  |
| 1 | C56574      | 4.0  | 1.10176E-11 | 338  | 330 | 2237690   |
| 1 | C65674      | 8.0  | 2.22E-29    | 531  | 814 | 34412226  |
| 1 | C68006      | 8.0  | 3.41331E-13 | 628  | 534 | 79823713  |
| 1 | C69820      | 11.0 | 6.1829E-09  | 752  | 690 | 62144149  |
| 1 | C60638      | 6.0  | 9.15E-19    | 402  | 724 | 77992732  |
| 1 | C57712      | 8.0  | 2.8211E-09  | 354  | 427 | 8364352   |
| 1 | C60978      | 6.0  | 5.13373E-08 | 409  | 577 | 83263843  |
| 1 | C54752      | 4.0  | 1.03E-48    | 314  | 507 | 27825727  |
| 1 | C68604      | 9.0  | 3.61642E-13 | 664  | 608 | 31391944  |
| 1 | C70496      | 10.0 | 6.50918E-06 | 820  | 654 | 305641686 |
| 1 | C57976      | 11.0 | 4.45719E-08 | 358  | 515 | 19696880  |
| 1 | C68346      | 9.0  | 6.44E-61    | 647  | 783 | 31889547  |
| 1 | C59748      | 6.0  | 1.38E-54    | 387  | 632 | 62144681  |
| 1 | C59784      | 61.0 | 0           | 388  | 636 | 114488428 |
| 1 | C53376      | 9.0  | 2.27473E-06 | 300  | 463 | 2553534   |
| 1 | scaffold86  | 7.0  | 9.73195E-15 | 1087 | 724 | 62135654  |
| 1 | C53772      | 7.0  | 2.30745E-06 | 304  | 381 | 282760009 |
| 1 | C71304      | 10.0 | 1.254E-10   | 935  | 888 | 47010404  |
| 1 | C62396      | 8.0  | 8.94651E-10 | 438  | 468 | 12271027  |
| 1 | C57588      | 5.0  | 7.65E-16    | 352  | 288 | 6975958   |
| 1 | C71314      | 6.0  | 1.95981E-09 | 936  | 639 | 213482504 |
| 1 | C69160      | 9.0  | 8.08E-36    | 701  | 680 | 60607532  |
| 1 | C69504      | 5.0  | 6.20061E-12 | 727  | 803 | 60575125  |
| 1 | C71034      | 7.0  | 3.1658E-14  | 899  | 561 | 80485546  |
| 1 | C73706      | 9.0  | 2.63839E-14 | 2914 | 718 | 282752988 |
| 1 | C57408      | 7.0  | 1.78531E-10 | 350  | 595 | 49898695  |
| 1 | C58270      | 7.0  | 2.24E-25    | 362  | 635 | 13742062  |
| 1 | scaffold228 | 7.6  | 6.23E-28    | 938  | 550 | 83435949  |
| 1 | C60536      | 8.0  | 5.01434E-08 | 400  | 354 | 1321506   |
| 1 | C73510      | 10.0 | 7.98E-20    | 2076 | 669 | 67564895  |
| 1 | scaffold275 | 8.2  | 1.68E-54    | 1787 | 565 | 50441438  |
| 1 | C61584      | 5.0  | 2.25533E-13 | 421  | 371 | 91725754  |
| 1 | C59208      | 7.0  | 2.01792E-13 | 379  | 642 | 213472908 |
| 1 | C71294      | 10.0 | 1.26E-47    | 933  | 757 | 282727029 |
| 1 | C71642      | 8.0  | 8.2269E-09  | 993  | 536 | 33209799  |
| 1 | C73590      | 9.0  | 5.70E-21    | 2310 | 569 | 83479699  |

|   |             |      |             |      |     |           |
|---|-------------|------|-------------|------|-----|-----------|
| 1 | C57170      | 4.0  | 8.74E-28    | 346  | 802 | 15708322  |
| 1 | C71486      | 9.0  | 7.66074E-06 | 961  | 760 | 62848620  |
| 1 | C71740      | 7.0  | 9.02767E-15 | 1010 | 667 | 60441011  |
| 1 | C57926      | 8.0  | 1.43E-100   | 357  | 951 | 76381091  |
| 1 | C73006      | 10.0 | 0           | 1445 | 712 | 59810035  |
| 1 | C56164      | 7.0  | 5.16E-26    | 332  | 408 | 60482625  |
| 1 | C61734      | 6.0  | 3.68384E-15 | 424  | 308 | 12301882  |
| 1 | C71866      | 8.0  | 1.3373E-07  | 1033 | 794 | 67563794  |
| 1 | C65116      | 8.0  | 1.01285E-06 | 513  | 506 | 45698237  |
| 1 | scaffold252 | 8.0  | 6.65518E-10 | 1248 | 585 | 50535757  |
| 1 | C69720      | 5.0  | 3.76668E-07 | 743  | 637 | 62890061  |
| 1 | C68348      | 5.0  | 2.17153E-11 | 647  | 566 | 86224623  |
| 1 | C65400      | 9.0  | 2.82092E-13 | 523  | 608 | 31391944  |
| 1 | C59112      | 8.0  | 2.00662E-13 | 377  | 588 | 115357513 |
| 1 | C69562      | 11.0 | 2.59E-51    | 733  | 638 | 58032618  |
| 1 | C70554      | 9.0  | 0           | 828  | 601 | 32273992  |
| 1 | C69148      | 8.0  | 2.64E-20    | 701  | 578 | 83108620  |
| 1 | C72124      | 8.0  | 0           | 1096 | 803 | 62840583  |
| 1 | C67698      | 5.0  | 1.98049E-08 | 614  | 568 | 28445240  |
| 1 | C62318      | 7.0  | 8.92501E-10 | 437  | 316 | 318720    |
| 1 | C55714      | 9.0  | 1.44E-72    | 326  | 664 | 60563913  |
| 1 | C53886      | 5.0  | 9.867E-12   | 305  | 858 | 82971523  |
| 1 | C58900      | 4.0  | 5.84E-26    | 373  | 655 | 50523853  |
| 1 | C70918      | 8.0  | 2.98238E-11 | 880  | 485 | 52804561  |
| 1 | C61234      | 6.0  | 9.07E-16    | 413  | 411 | 22919862  |
| 1 | C72292      | 8.0  | 6.54E-16    | 1140 | 650 | 76234974  |
| 1 | C62482      | 9.0  | 1.13E-27    | 440  | 755 | 60612972  |
| 1 | C62698      | 8.0  | 1.14E-27    | 445  | 531 | 60608085  |
| 1 | C69768      | 9.0  | 4.41E-19    | 747  | 906 | 29494140  |
| 1 | C68062      | 10.0 | 8.37375E-11 | 632  | 353 | 8264328   |
| 1 | C66072      | 8.0  | 6.89832E-08 | 544  | 433 | 14439860  |
| 1 | C66122      | 7.0  | 4.27139E-06 | 546  | 292 | 152010431 |
| 1 | C58082      | 10.0 | 7.24753E-10 | 359  | 575 | 119531310 |
| 1 | C57542      | 8.0  | 6.81333E-07 | 351  | 377 | 4482171   |
| 1 | C69468      | 5.0  | 8.42E-73    | 724  | 767 | 67564902  |
| 1 | C55240      | 4.0  | 6.4088E-10  | 320  | 533 | 12182038  |
| 1 | C57610      | 6.0  | 3.15E-18    | 353  | 455 | 305633796 |
| 1 | C62032      | 7.0  | 8.51E-44    | 430  | 712 | 5434998   |
| 1 | C59240      | 11.0 | 3.27147E-15 | 379  | 747 | 21168606  |
| 1 | C54776      | 8.0  | 2.39746E-06 | 315  | 320 | 42581837  |
| 1 | C61536      | 9.0  | 1.33624E-08 | 420  | 577 | 78251542  |
| 1 | C70216      | 7.0  | 2.66222E-11 | 788  | 699 | 49344242  |
| 1 | C61338      | 7.0  | 5.21333E-08 | 415  | 818 | 23698306  |
| 1 | C57538      | 6.0  | 2.79561E-09 | 351  | 502 | 82172814  |
| 1 | C53822      | 6.0  | 6.0647E-10  | 304  | 321 | 14437112  |
| 1 | C63948      | 5.0  | 9.80675E-10 | 478  | 661 | 15156582  |
| 1 | C61162      | 6.0  | 1.35976E-11 | 412  | 920 | 28831635  |
| 1 | C54190      | 8.0  | 2.34018E-06 | 308  | 629 | 60580091  |

|   |             |      |             |      |     |           |
|---|-------------|------|-------------|------|-----|-----------|
| 1 | C72512      | 10.0 | 1.04547E-11 | 1210 | 469 | 92173405  |
| 1 | C70508      | 9.0  | 4.3408E-10  | 822  | 543 | 83106084  |
| 1 | C69882      | 8.0  | 6.22531E-09 | 757  | 381 | 282738133 |
| 1 | C71818      | 10.0 | 8.17526E-06 | 1024 | 680 | 60607532  |
| 1 | C66134      | 10.0 | 8.05E-20    | 546  | 402 | 62805812  |
| 1 | C65964      | 7.0  | 5.72E-30    | 541  | 685 | 60639015  |
| 1 | C63860      | 5.0  | 3.99739E-12 | 475  | 113 | 41110936  |
| 1 | C53610      | 7.0  | 2.29109E-06 | 302  | 369 | 18961729  |
| 1 | C67094      | 5.0  | 3.05866E-10 | 586  | 732 | 62136324  |
| 1 | C59168      | 5.0  | 7.37248E-07 | 378  | 663 | 23066935  |
| 1 | C66002      | 7.0  | 7.13625E-11 | 542  | 567 | 81151350  |
| 1 | scaffold258 | 6.0  | 1.30082E-13 | 934  | 108 | 109535318 |
| 1 | C70672      | 9.0  | 4.03E-38    | 847  | 727 | 60436400  |
| 1 | C66696      | 4.0  | 4.80019E-12 | 568  | 402 | 104302202 |
| 1 | C69860      | 11.0 | 2.45299E-08 | 755  | 804 | 288290042 |
| 1 | C70118      | 11.0 | 1.56268E-06 | 779  | 688 | 71966905  |
| 1 | C68236      | 7.0  | 3.48665E-13 | 641  | 812 | 23697085  |
| 1 | C61834      | 7.0  | 5.56545E-11 | 426  | 534 | 83557045  |
| 1 | C71078      | 5.0  | 8.05813E-15 | 904  | 443 | 5673726   |
| 1 | C64480      | 3.0  | 2.76E-16    | 494  | 656 | 62137324  |
| 1 | C70046      | 8.0  | 3.9184E-07  | 772  | 739 | 60626264  |
| 1 | C71902      | 8.0  | 8.97503E-12 | 1042 | 314 | 45768806  |
| 1 | C73412      | 9.0  | 1.09473E-15 | 1896 | 648 | 62139601  |
| 1 | C69112      | 10.0 | 3.96E-16    | 699  | 875 | 30853346  |
| 1 | C54038      | 3.0  | 4.91E-29    | 306  | 658 | 298954959 |
| 1 | C63330      | 7.0  | 1.23E-30    | 461  | 472 | 60527204  |
| 1 | C63782      | 6.0  | 3.83228E-09 | 473  | 578 | 78280470  |
| 1 | C73188      | 8.0  | 1.30952E-08 | 1567 | 615 | 62888921  |
| 1 | C57446      | 8.0  | 8.20E-22    | 350  | 441 | 18821123  |
| 1 | C72568      | 10.0 | 4.05146E-08 | 1232 | 515 | 83247266  |
| 1 | C70224      | 10.0 | 1.14E-16    | 789  | 662 | 10910867  |
| 1 | C68214      | 6.0  | 5.0391E-06  | 640  | 549 | 14447785  |
| 1 | C65676      | 5.0  | 1.37E-27    | 531  | 528 | 18823006  |
| 1 | C56664      | 7.0  | 2.59384E-06 | 339  | 453 | 114754920 |
| 1 | C67564      | 9.0  | 3.16732E-10 | 606  | 861 | 21180201  |
| 1 | C71862      | 10.0 | 1.38738E-10 | 1032 | 631 | 213485337 |
| 1 | C70354      | 6.0  | 5.52E-31    | 803  | 532 | 57700803  |
| 1 | C60508      | 8.0  | 1.98123E-07 | 400  | 761 | 259800985 |
| 1 | C71302      | 9.0  | 1.09E-35    | 934  | 808 | 114490769 |
| 1 | C72772      | 10.0 | 7.27797E-13 | 1313 | 617 | 60564903  |
| 1 | C56326      | 8.0  | 2.75317E-12 | 334  | 351 | 60579862  |
| 1 | C63834      | 9.0  | 5.01E-30    | 475  | 794 | 53707302  |
| 1 | C73526      | 9.0  | 4.6791E-12  | 2127 | 323 | 14445068  |
| 1 | C60484      | 6.0  | 3.45475E-15 | 399  | 111 | 67567690  |
| 1 | C68554      | 5.0  | 5.21061E-06 | 661  | 372 | 1212370   |
| 1 | C73282      | 9.0  | 2.47E-16    | 1690 | 578 | 21771623  |
| 1 | C63440      | 5.0  | 3.61665E-06 | 464  | 683 | 10839037  |
| 1 | C64418      | 9.0  | 6.20982E-08 | 492  | 796 | 28280205  |

|   |        |      |             |      |      |           |
|---|--------|------|-------------|------|------|-----------|
| 1 | C69310 | 6.0  | 1.48113E-09 | 713  | 618  | 19025087  |
| 1 | C53326 | 9.0  | 1.52E-47    | 300  | 727  | 62133069  |
| 1 | C65544 | 6.0  | 2.78E-84    | 527  | 727  | 62133069  |
| 1 | C66168 | 6.0  | 4.01E-37    | 548  | 547  | 60513968  |
| 1 | C64828 | 6.0  | 1.32E-101   | 505  | 507  | 112767046 |
| 1 | C56002 | 6.0  | 4.08576E-08 | 330  | 552  | 82134935  |
| 1 | C66900 | 5.0  | 2.89825E-07 | 577  | 534  | 78308766  |
| 1 | C57772 | 6.0  | 2.11E-22    | 355  | 804  | 302110699 |
| 1 | C57282 | 8.0  | 9.13E-31    | 348  | 418  | 183147358 |
| 1 | C71112 | 4.0  | 7.57E-46    | 909  | 536  | 47326377  |
| 1 | C65500 | 7.0  | 2.62621E-07 | 525  | 869  | 51881803  |
| 1 | C63468 | 9.0  | 2.25E-41    | 465  | 1364 | 199587352 |
| 1 | C62140 | 6.0  | 3.51E-46    | 432  | 750  | 84583213  |
| 1 | C65444 | 5.0  | 4.28E-46    | 524  | 695  | 62143782  |
| 1 | C55938 | 6.0  | 2.60867E-09 | 329  | 630  | 288235737 |
| 1 | C70608 | 10.0 | 6.66435E-06 | 839  | 920  | 34407724  |
| 1 | C65094 | 7.0  | 3.99371E-06 | 512  | 581  | 9748413   |
| 1 | C66816 | 10.0 | 2.99347E-10 | 574  | 771  | 62838286  |
| 1 | C56240 | 8.0  | 2.96E-18    | 333  | 660  | 50655735  |
| 1 | C71128 | 9.0  | 8.1313E-15  | 912  | 688  | 60434002  |
| 1 | C53942 | 8.0  | 4.71E-26    | 305  | 641  | 104296258 |
| 1 | C71558 | 10.0 | 8.07424E-09 | 975  | 942  | 82821741  |
| 1 | C72392 | 8.0  | 6.97E-19    | 1168 | 725  | 60559043  |
| 1 | C66906 | 9.0  | 4.52457E-06 | 577  | 692  | 116839497 |
| 1 | C63158 | 6.0  | 8.79E-78    | 456  | 766  | 84580504  |
| 1 | C63668 | 8.0  | 3.81529E-09 | 471  | 339  | 40793074  |
| 1 | C68710 | 8.0  | 1.01E-56    | 672  | 877  | 62919872  |
| 1 | C62424 | 7.0  | 3.07E-34    | 439  | 621  | 11217050  |
| 1 | C62464 | 7.0  | 4.99E-36    | 440  | 466  | 33271798  |
| 1 | C69864 | 4.0  | 6.02E-43    | 755  | 794  | 112229223 |
| 1 | C53808 | 7.0  | 0.000000584 | 304  | 565  | 20430275  |
| 1 | C68772 | 8.0  | 2.27942E-11 | 678  | 676  | 40800667  |
| 1 | C64392 | 6.0  | 5.37E-33    | 491  | 669  | 56274988  |
| 1 | C73440 | 10.0 | 6.68991E-11 | 1950 | 707  | 50630156  |
| 1 | C58834 | 9.0  | 3.08849E-12 | 372  | 554  | 60590476  |
| 1 | C71260 | 7.0  | 3.80E-26    | 928  | 691  | 60440476  |
| 1 | C55678 | 8.0  | 7.90E-25    | 326  | 731  | 282759073 |
| 1 | C67298 | 6.0  | 9.57E-63    | 595  | 487  | 60636630  |
| 1 | C69046 | 9.0  | 3.94E-16    | 695  | 801  | 282727888 |
| 1 | C72578 | 9.0  | 4.58E-54    | 1235 | 920  | 148752118 |
| 1 | C53654 | 4.0  | 9.05238E-06 | 302  | 796  | 58299089  |
| 1 | C65366 | 4.0  | 2.61052E-07 | 522  | 830  | 56396584  |
| 1 | C65962 | 9.0  | 2.53E-38    | 541  | 690  | 33290179  |
| 1 | C71724 | 8.0  | 9.36E-18    | 1008 | 915  | 148753160 |
| 1 | C68658 | 5.0  | 3.93E-19    | 669  | 600  | 282751687 |
| 1 | C71384 | 7.0  | 2.139E-15   | 947  | 475  | 27826009  |
| 1 | C54846 | 3.0  | 6.32278E-10 | 316  | 761  | 282750024 |
| 1 | C59462 | 5.0  | 3.44E-18    | 383  | 488  | 282736403 |



|   |             |      |             |      |     |           |
|---|-------------|------|-------------|------|-----|-----------|
| 1 | C61168      | 6.0  | 2.20446E-13 | 412  | 482 | 60524674  |
| 1 | C56988      | 5.0  | 6.66837E-07 | 344  | 834 | 23697081  |
| 1 | C67098      | 8.0  | 2.30E-60    | 586  | 730 | 282754221 |
| 1 | C71700      | 8.0  | 8.63153E-12 | 1003 | 759 | 40404306  |
| 1 | C60574      | 5.0  | 3.47307E-15 | 401  | 643 | 50515833  |
| 1 | C65370      | 8.0  | 6.60703E-08 | 522  | 606 | 280972295 |
| 1 | C72050      | 9.0  | 2.17865E-06 | 1077 | 490 | 50449975  |
| 1 | C54584      | 7.0  | 4.65E-23    | 312  | 617 | 60563611  |
| 1 | C64926      | 4.0  | 1.03894E-09 | 507  | 406 | 50528609  |
| 1 | C61618      | 4.0  | 1.26E-76    | 421  | 750 | 60632129  |
| 1 | C63410      | 8.0  | 8.60E-75    | 463  | 370 | 84582368  |
| 1 | C65572      | 8.0  | 2.47E-38    | 528  | 908 | 148752297 |
| 1 | C72336      | 7.0  | 1.92E-136   | 1155 | 783 | 56390895  |
| 1 | C72206      | 11.0 | 2.3419E-09  | 1114 | 701 | 62144855  |
| 1 | C73194      | 8.0  | 4.87E-39    | 1577 | 920 | 148752118 |
| 1 | C62972      | 6.0  | 5.70415E-08 | 452  | 630 | 305633599 |
| 1 | C64568      | 5.0  | 9.77706E-07 | 496  | 649 | 45762365  |
| 1 | C67454      | 10.0 | 1.19474E-06 | 601  | 785 | 67564591  |
| 1 | C73490      | 10.0 | 1.04903E-06 | 2033 | 422 | 6139684   |
| 1 | C65010      | 7.0  | 2.74757E-13 | 510  | 550 | 60559399  |
| 1 | C58610      | 4.0  | 7.16539E-07 | 368  | 477 | 49687100  |
| 1 | C64364      | 8.0  | 9.65304E-07 | 490  | 563 | 83225402  |
| 1 | C58406      | 6.0  | 1.79778E-07 | 365  | 690 | 24784870  |
| 1 | C63696      | 4.0  | 4.44E-21    | 471  | 799 | 34410677  |
| 1 | C66628      | 8.0  | 2.84071E-07 | 566  | 442 | 7057110   |
| 1 | scaffold189 | 4.9  | 2.43959E-08 | 751  | 233 | 60638583  |
| 1 | C71520      | 9.0  | 1.57E-25    | 967  | 578 | 83108620  |
| 1 | C70312      | 8.0  | 1.66359E-09 | 798  | 923 | 23703970  |
| 1 | C58784      | 5.0  | 2.05E-16    | 371  | 592 | 154766852 |
| 1 | C72432      | 9.0  | 7.58E-25    | 1178 | 326 | 317413    |
| 1 | C71880      | 10.0 | 5.70954E-13 | 1035 | 451 | 50278601  |
| 1 | C63898      | 7.0  | 3.72302E-06 | 477  | 689 | 60562230  |
| 1 | C72482      | 9.0  | 6.14178E-07 | 1197 | 516 | 148194085 |
| 1 | C73074      | 10.0 | 1.02E-101   | 1495 | 461 | 60637765  |
| 1 | C68564      | 4.0  | 0           | 662  | 766 | 84580504  |
| 1 | C66148      | 8.0  | 2.95632E-13 | 547  | 460 | 60631894  |
| 1 | C63622      | 59.0 | 2.83E-22    | 469  | 610 | 50514989  |
| 1 | C67384      | 5.0  | 2.42E-26    | 598  | 571 | 50450962  |
| 1 | C69408      | 9.0  | 1.51E-46    | 721  | 486 | 104300537 |
| 1 | C70402      | 5.0  | 7.75E-21    | 809  | 320 | 60567402  |
| 1 | scaffold148 | 7.4  | 9.74E-30    | 905  | 736 | 45765380  |
| 1 | C69342      | 8.0  | 3.90979E-13 | 716  | 631 | 32209673  |
| 1 | C68048      | 4.0  | 2.03746E-08 | 631  | 790 | 46170187  |
| 1 | C66944      | 6.0  | 6.38E-33    | 579  | 461 | 71968176  |
| 1 | C58132      | 4.0  | 2.76567E-06 | 360  | 666 | 167687185 |
| 1 | C57258      | 10.0 | 6.7512E-07  | 348  | 890 | 31005517  |
| 1 | C54512      | 5.0  | 3.98123E-11 | 311  | 751 | 83068226  |
| 1 | C70028      | 8.0  | 1.62E-46    | 771  | 819 | 60609007  |

|   |             |      |             |      |     |           |
|---|-------------|------|-------------|------|-----|-----------|
| 1 | C70384      | 5.0  | 4.09627E-07 | 806  | 772 | 74373529  |
| 1 | C65862      | 3.0  | 4.39E-46    | 537  | 557 | 83530277  |
| 1 | C62160      | 7.0  | 5.66188E-11 | 433  | 623 | 112766892 |
| 1 | C71628      | 7.0  | 2.07787E-09 | 991  | 159 | 84959392  |
| 1 | C62234      | 4.0  | 6.85E-26    | 434  | 531 | 83257467  |
| 1 | C62708      | 4.0  | 1.42018E-08 | 445  | 328 | 84913243  |
| 1 | C66174      | 4.0  | 1.71E-42    | 548  | 653 | 207865143 |
| 1 | C55404      | 4.0  | 4.16E-48    | 322  | 382 | 60526114  |
| 1 | C53386      | 5.0  | 9.33354E-09 | 300  | 539 | 83243364  |
| 1 | C58524      | 6.0  | 7.41958E-10 | 367  | 787 | 15192123  |
| 1 | C63712      | 5.0  | 2.44936E-10 | 472  | 424 | 13659904  |
| 1 | C57366      | 4.0  | 4.50471E-11 | 349  | 566 | 74261861  |
| 1 | C69878      | 8.0  | 1.13E-19    | 756  | 655 | 62837149  |
| 1 | C72694      | 10.0 | 7.59E-19    | 1270 | 580 | 60582450  |
| 1 | C72310      | 9.0  | 9.90864E-12 | 1148 | 698 | 18992455  |
| 1 | C69818      | 5.0  | 2.53346E-11 | 751  | 814 | 259801050 |
| 1 | C66858      | 6.0  | 0.000001141 | 575  | 710 | 54536780  |
| 1 | C71440      | 8.0  | 2.33E-21    | 955  | 766 | 67563958  |
| 1 | scaffold75  | 8.8  | 3.67E-22    | 2321 | 685 | 62144228  |
| 1 | C61824      | 4.0  | 5.55168E-11 | 425  | 481 | 9513774   |
| 1 | C72176      | 5.0  | 2.24066E-06 | 1107 | 565 | 83231497  |
| 1 | C69108      | 5.0  | 7.19E-27    | 699  | 585 | 282723855 |
| 1 | C57916      | 4.0  | 8.38E-22    | 357  | 767 | 67564902  |
| 1 | C73244      | 63.0 | 4.05E-58    | 1631 | 407 | 60518838  |
| 1 | C56780      | 5.0  | 1.82E-50    | 341  | 571 | 80956353  |
| 1 | C57266      | 5.0  | 4.66373E-14 | 348  | 613 | 108851421 |
| 1 | C70912      | 5.0  | 4.87E-50    | 880  | 614 | 183131176 |
| 1 | C72556      | 5.0  | 6.79277E-13 | 1227 | 616 | 289589089 |
| 1 | C72626      | 9.0  | 4.42344E-14 | 1247 | 314 | 60589734  |
| 1 | C56342      | 7.0  | 2.55293E-06 | 334  | 842 | 108846291 |
| 1 | C53930      | 4.0  | 4.04858E-14 | 305  | 457 | 5364612   |
| 1 | C62406      | 5.0  | 6.47E-57    | 438  | 580 | 28149385  |
| 1 | C57128      | 8.0  | 2.65112E-06 | 346  | 892 | 54500750  |
| 1 | C66310      | 9.0  | 1.13768E-09 | 553  | 591 | 8611640   |
| 1 | C63780      | 9.0  | 3.97974E-12 | 473  | 762 | 146287074 |
| 1 | C53618      | 6.0  | 7.00E-22    | 302  | 823 | 18986940  |
| 1 | C72306      | 9.0  | 1.60354E-13 | 1146 | 689 | 6360679   |
| 1 | C55438      | 4.0  | 5.59E-35    | 322  | 857 | 74542711  |
| 1 | C73374      | 11.0 | 1.44E-76    | 1827 | 594 | 302096992 |
| 1 | C60076      | 8.0  | 2.01936E-10 | 393  | 759 | 282724412 |
| 1 | C61080      | 7.0  | 2.46E-22    | 411  | 677 | 60564847  |
| 1 | scaffold225 | 9.4  | 2.09E-30    | 771  | 955 | 269808945 |
| 1 | C57072      | 9.0  | 2.98E-52    | 345  | 768 | 84584849  |
| 1 | scaffold121 | 8.0  | 1.60E-33    | 575  | 857 | 84586089  |
| 1 | C70684      | 9.0  | 4.90E-90    | 847  | 789 | 60572623  |
| 1 | C54474      | 8.0  | 4.17E-51    | 311  | 537 | 62844649  |
| 1 | C60872      | 7.0  | 1.57E-60    | 407  | 408 | 282759689 |
| 1 | C73516      | 16.0 | 5.36E-24    | 2096 | 578 | 60557987  |

|   |             |      |             |      |      |           |
|---|-------------|------|-------------|------|------|-----------|
| 1 | C59070      | 8.0  | 6.40E-69    | 376  | 546  | 146067441 |
| 1 | C68262      | 5.0  | 2.40E-165   | 643  | 623  | 18818230  |
| 1 | C65816      | 9.0  | 1.10119E-09 | 536  | 780  | 282753531 |
| 1 | scaffold269 | 7.7  | 3.76E-49    | 1697 | 734  | 67563072  |
| 1 | C62654      | 8.0  | 4.85E-33    | 444  | 524  | 221026382 |
| 1 | C58866      | 7.0  | 2.22E-22    | 373  | 1241 | 199585096 |
| 1 | C72210      | 10.0 | 1.17E-63    | 1116 | 593  | 18823386  |
| 1 | scaffold261 | 8.3  | 2.95E-52    | 1289 | 594  | 49688673  |
| 1 | C61340      | 8.0  | 0           | 415  | 599  | 50640430  |
| 1 | C72376      | 8.0  | 0           | 1164 | 768  | 148753261 |
| 1 | C65388      | 8.0  | 1.25E-21    | 522  | 821  | 62842043  |
| 1 | C67762      | 8.0  | 1.73E-70    | 616  | 463  | 18822765  |
| 1 | C66040      | 8.0  | 6.78E-116   | 543  | 600  | 50523177  |
| 1 | C66314      | 7.0  | 2.24E-63    | 553  | 732  | 62137927  |
| 1 | C71176      | 9.0  | 1.50E-62    | 919  | 888  | 282723044 |
| 1 | C70412      | 10.0 | 0           | 810  | 688  | 60554344  |
| 1 | C70722      | 10.0 | 0           | 852  | 779  | 23697977  |
| 1 | C73076      | 8.0  | 1.24E-153   | 1497 | 396  | 1961362   |
| 1 | C69006      | 6.0  | 1.26E-71    | 693  | 710  | 282759551 |
| 1 | C68948      | 5.0  | 1.37458E-06 | 688  | 597  | 94973526  |
| 1 | C71496      | 9.0  | 3.27122E-11 | 963  | 938  | 82962140  |
| 1 | C58112      | 9.0  | 7.22E-155   | 360  | 695  | 154475852 |
| 1 | C66152      | 8.0  | 3.46E-62    | 547  | 418  | 86239555  |
| 1 | C61266      | 7.0  | 7.88E-41    | 414  | 792  | 67562667  |
| 1 | C71252      | 8.0  | 3.17E-48    | 927  | 562  | 50454799  |
| 1 | C66074      | 6.0  | 1.09E-43    | 544  | 571  | 47438152  |
| 1 | C68824      | 5.0  | 3.37E-78    | 681  | 766  | 84580504  |
| 1 | C67782      | 8.0  | 3.04E-78    | 617  | 570  | 80839455  |
| 1 | C61278      | 9.0  | 5.24E-45    | 414  | 855  | 40798749  |
| 1 | C57026      | 6.0  | 1.50E-143   | 344  | 793  | 23701946  |
| 1 | C57042      | 6.0  | 2.21E-28    | 345  | 688  | 27835407  |
| 1 | C72134      | 6.0  | 1.11E-60    | 1098 | 645  | 182486468 |
| 1 | C73276      | 8.0  | 0           | 1681 | 834  | 40797744  |
| 1 | C73250      | 10.0 | 2.85E-102   | 1648 | 640  | 29262499  |
| 1 | C61208      | 6.0  | 0           | 413  | 436  | 15080829  |
| 1 | C64620      | 8.0  | 3.02E-59    | 498  | 569  | 182468752 |
| 1 | C61246      | 5.0  | 4.54E-70    | 414  | 551  | 282732324 |
| 1 | C68336      | 9.0  | 8.71E-85    | 647  | 602  | 29256349  |
| 1 | C68094      | 7.0  | 2.90E-72    | 634  | 505  | 18822969  |
| 1 | scaffold190 | 7.6  | 7.36E-126   | 809  | 737  | 34409125  |
| 1 | C63240      | 5.0  | 1.77E-23    | 459  | 772  | 84582250  |
| 1 | C63766      | 6.0  | 9.33985E-07 | 473  | 822  | 154538039 |
| 1 | C66206      | 8.0  | 1.17254E-12 | 549  | 868  | 60970020  |
| 1 | C60762      | 6.0  | 1.28588E-08 | 405  | 281  | 215281027 |
| 1 | C62684      | 9.0  | 9.81E-16    | 445  | 535  | 80485888  |
| 1 | C64986      | 5.0  | 4.12193E-09 | 509  | 672  | 49898699  |
| 1 | C63148      | 5.0  | 2.29E-44    | 456  | 408  | 762381    |
| 1 | C60124      | 8.0  | 3.03569E-06 | 393  | 1071 | 15945998  |

|   |             |      |             |      |     |           |
|---|-------------|------|-------------|------|-----|-----------|
| 1 | C62202      | 7.0  | 3.37118E-06 | 434  | 58  | 60561023  |
| 1 | C62562      | 5.0  | 3.09E-34    | 442  | 407 | 60718932  |
| 1 | C63136      | 8.0  | 4.99E-33    | 456  | 768 | 112763070 |
| 1 | C64816      | 8.0  | 1.30E-27    | 504  | 496 | 56397332  |
| 1 | C66146      | 5.0  | 3.85E-34    | 547  | 748 | 67564722  |
| 1 | C65968      | 8.0  | 1.07072E-06 | 541  | 662 | 159710399 |
| 1 | C56520      | 5.0  | 2.57748E-06 | 337  | 743 | 62848333  |
| 1 | C67264      | 9.0  | 0           | 593  | 608 | 26018097  |
| 1 | C57340      | 6.0  | 0           | 349  | 918 | 23703702  |
| 1 | C72724      | 5.0  | 3.19E-95    | 1283 | 861 | 84586461  |
| 1 | C66682      | 6.0  | 5.02E-52    | 568  | 545 | 60539453  |
| 1 | C54452      | 6.0  | 4.88E-100   | 311  | 695 | 62143782  |
| 1 | C57498      | 5.0  | 1.85966E-13 | 351  | 695 | 62143782  |
| 1 | C63350      | 9.0  | 3.26E-71    | 462  | 807 | 60636807  |
| 1 | C67896      | 8.0  | 3.24881E-10 | 621  | 491 | 62139496  |
| 1 | scaffold211 | 4.5  | 2.23852E-08 | 691  | 598 | 56392203  |
| 1 | C66110      | 7.0  | 4.59761E-12 | 545  | 527 | 282747991 |
| 1 | C71984      | 8.0  | 1.79E-28    | 1062 | 341 | 60436803  |
| 1 | C70978      | 11.0 | 4.71567E-10 | 891  | 882 | 59783258  |
| 1 | C68904      | 9.0  | 3.37E-41    | 686  | 816 | 62844105  |
| 1 | scaffold22  | 6.0  | 1.27E-27    | 494  | 760 | 62850762  |
| 1 | C59120      | 9.0  | 1.28536E-14 | 377  | 513 | 282729549 |
| 1 | C69104      | 8.0  | 8.93737E-08 | 698  | 460 | 60441229  |
| 1 | C58126      | 9.0  | 1.06E-39    | 360  | 792 | 67562667  |
| 1 | C57956      | 4.0  | 4.61492E-11 | 357  | 466 | 92101406  |
| 1 | C59970      | 4.0  | 3.25615E-12 | 391  | 505 | 60560482  |
| 1 | C55264      | 9.0  | 3.22E-101   | 320  | 319 | 104300267 |
| 1 | C65600      | 7.0  | 8.08E-23    | 528  | 853 | 282752444 |
| 1 | C61192      | 5.0  | 3.44146E-12 | 412  | 898 | 148752116 |
| 1 | C64802      | 8.0  | 7.41E-20    | 504  | 783 | 148752169 |
| 1 | C66190      | 8.0  | 8.08E-20    | 548  | 684 | 282756500 |
| 1 | C69512      | 6.0  | 3.68821E-07 | 728  | 813 | 61011700  |
| 1 | C58894      | 2.0  | 5.42E-20    | 373  | 734 | 62116513  |
| 1 | C67516      | 10.0 | 3.30E-50    | 604  | 630 | 60438260  |
| 1 | C69810      | 5.0  | 1.50273E-06 | 750  | 568 | 282753485 |
| 1 | C63396      | 7.0  | 4.20E-18    | 463  | 753 | 62143727  |
| 1 | C68010      | 8.0  | 1.40053E-15 | 628  | 383 | 104298965 |
| 1 | C60244      | 6.0  | 8.33041E-13 | 395  | 527 | 282747991 |
| 1 | C57276      | 4.0  | 0           | 348  | 684 | 60539517  |
| 1 | C68868      | 9.0  | 3.59108E-10 | 684  | 676 | 50682034  |
| 1 | C53660      | 4.0  | 2.29109E-06 | 302  | 474 | 157990322 |
| 1 | C59992      | 6.0  | 1.57E-63    | 391  | 778 | 60613376  |
| 1 | C63374      | 10.0 | 2.39493E-10 | 462  | 441 | 209426428 |
| 1 | C70060      | 9.0  | 2.26E-36    | 773  | 761 | 60634008  |
| 1 | scaffold259 | 9.0  | 3.32E-89    | 1435 | 617 | 84582449  |
| 1 | scaffold140 | 6.3  | 3.12E-75    | 656  | 809 | 23694094  |
| 1 | C63340      | 7.0  | 1.85E-26    | 462  | 898 | 148752168 |
| 1 | C71980      | 9.0  | 1.37437E-07 | 1061 | 719 | 160592757 |

---
