# Supplementary material for: Genome Analysis of the Domestic Dog (Korean Jindo) by Massively Parallel Sequencing
Source: PubMed Central journal article supplement — DNA Res. 2012 Apr 3;19(3):275–88. doi: 10.1093/dnares/dss011 (PMC3372376; doi:10.1093/dnares/dss011), 2012-04-03
Supplement: supp_dss011_dss011supp_table10.pdf [file supp_dss011_dss011supp_table10.pdf]

Supplementary Table 10. 42 scaffolds (derived from unmapped reads) were matched to the EST database but unmatched to the NR-nucleotide database

| rank | contig_id      | pscore      | query_length | target_length | target_accession |
|------|----------------|-------------|--------------|---------------|------------------|
| 1    | C53546 6.0     | 2.86E-24    | 301          | 609           | 84588596         |
| 1    | C53766 6.0     | 8.91E-77    | 304          | 653           | 18817627         |
| 1    | C53830 5.0     | 2.30745E-06 | 304          | 651           | 112589012        |
| 1    | C53974 6.0     | 1.42E-149   | 306          | 596           | 50529253         |
| 1    | C54826 8.0     | 5.08E-29    | 316          | 551           | 50449893         |
| 1    | C55664 4.0     | 8.02E-99    | 326          | 443           | 50440720         |
| 1    | C55674 7.0     | 3.39E-67    | 326          | 551           | 50449893         |
| 1    | C56050 7.0     | 9.95762E-06 | 330          | 557           | 50528320         |
| 1    | C56702 7.0     | 2.32E-179   | 340          | 561           | 50526540         |
| 1    | C58026 7.0     | 1.81E-118   | 359          | 641           | 60541493         |
| 1    | C59870 8.0     | 6.64E-69    | 389          | 609           | 84588596         |
| 1    | C59878 5.0     | 8.51E-16    | 389          | 863           | 84586154         |
| 1    | C60164 6.0     | 1.54E-134   | 394          | 569           | 60585400         |
| 1    | C60562 10.0    | 1.86E-38    | 401          | 582           | 50449823         |
| 1    | C60650 4.0     | 7.89021E-07 | 403          | 658           | 18823537         |
| 1    | C61634 7.0     | 1.41E-48    | 422          | 768           | 84584849         |
| 1    | C63244 7.0     | 1.66E-54    | 459          | 263           | 84589393         |
| 1    | C63536 6.0     | 2.30E-115   | 467          | 923           | 84589511         |
| 1    | C64908 9.0     | 0           | 507          | 664           | 60563913         |
| 1    | C65602 4.0     | 1.01E-40    | 528          | 501           | 15911712         |
| 1    | C65648 7.0     | 2.59E-78    | 530          | 609           | 84588596         |
| 1    | C65718 4.0     | 1.47E-178   | 533          | 329           | 60582512         |
| 1    | scaffold48 7.5 | 1.58E-110   | 540          | 483           | 18824422         |
| 1    | C66232 10.0    | 9.88E-72    | 550          | 840           | 84588081         |
| 1    | C66268 9.0     | 7.21E-156   | 551          | 618           | 50532189         |
| 1    | C66792 7.0     | 1.02E-34    | 573          | 653           | 18817627         |
| 1    | C67146 7.0     | 3.85E-28    | 588          | 609           | 84588596         |
| 1    | C68202 9.0     | 1.75E-104   | 639          | 551           | 50449893         |
| 1    | C68702 4.0     | 0           | 672          | 860           | 84588879         |
| 1    | C68814 10.0    | 9.38134E-14 | 680          | 406           | 60527815         |
| 1    | C69100 6.0     | 7.46E-30    | 698          | 609           | 84588596         |
| 1    | C69258 5.0     | 0           | 708          | 673           | 60539614         |
| 1    | C69624 9.0     | 5.17E-142   | 737          | 277           | 60635979         |
| 1    | C69972 10.0    | 6.33E-46    | 764          | 443           | 50440720         |
| 1    | C70632 7.0     | 2.89E-85    | 841          | 620           | 84589119         |
| 1    | C70970 7.0     | 6.72E-111   | 890          | 412           | 62146151         |
| 1    | C72338 9.0     | 3.93939E-11 | 1155         | 609           | 84588596         |
| 1    | C72362 7.0     | 2.46E-46    | 1162         | 412           | 62146151         |
| 1    | C72408 67.0    | 1.43E-75    | 1174         | 900           | 84586140         |
| 1    | C72662 9.0     | 2.05E-25    | 1257         | 181           | 60636521         |
| 1    | C73018 55.0    | 4.66E-42    | 1456         | 620           | 84589119         |
| 1    | C73228 7.0     | 2.36E-16    | 1613         | 609           | 84588596         |
