# Supplementary material for: Genome Analysis of the Domestic Dog (Korean Jindo) by Massively Parallel Sequencing
Source: PubMed Central journal article supplement — DNA Res. 2012 Apr 3;19(3):275–88. doi: 10.1093/dnares/dss011 (PMC3372376; doi:10.1093/dnares/dss011), 2012-04-03
Supplement: supp_dss011_dss011supp_table11.pdf [file supp_dss011_dss011supp_table11.pdf]

Supplementary Table 11. Homozygous SNPs in olfactory receptor genes

| Gene name   | SNP position | base in Boxer | base in Jindo |
|-------------|--------------|---------------|---------------|
| cOR4C65P_Ps | 709          | G             | A             |
| cOR4C42P_Ps | 844          | G             | A             |
| cOR4A29_CD  | 516          | A             | C             |
| cOR1L6_CD   | 837          | A             | G             |
| cOR6K5_CD   | 271          | G             | A             |
| cOR4Y3_CD   | 404          | A             | G             |
| cOR52M6P_Ps | 489          | T             | C             |
| cOR5BC2P_Ps | 440          | T             | G             |
| cOR4Q4_CD   | 36           | A             | G             |
| cOR13M5P_Ps | 287          | G             | C             |
| cOR2AG1_CD  | 253          | A             | T             |
| cOR4V2P_Ps  | 908          | T             | C             |
| cOR4C66P_Ps | 32           | A             | C             |
| cOR5D24P_Ps | 302          | G             | A             |
| cOR8J7_CD   | 114          | G             | C             |
| cOR8B1_CD   | 485          | G             | A             |
| cOR6B8_CD   | 501          | C             | G             |
| cOR4Q6P_Ps  | 452          | A             | G             |
| cOR6Z3_CD   | 454          | T             | C             |
| cOR7C54P_Ps | 334          | T             | C             |
| cOR7C42P_Ps | 26           | C             | T             |
| cOR1AO1P_Ps | 887          | G             | T             |
| cOR56A8_CD  | 111          | C             | T             |
| cOR10J14_CD | 440          | T             | C             |
| cOR4Q4_CD   | 755          | C             | G             |
| cOR2A33_CD  | 720          | C             | T             |
| cOR6C61P_Ps | 257          | A             | C             |
| cOR3A11_CD  | 265          | T             | C             |
| cOR2AX1_CD  | 183          | T             | C             |
| cOR9S19P_Ps | 549          | A             | G             |
| cOR5BC2P_Ps | 538          | T             | C             |
| cOR8B15P_Ps | 537          | T             | C             |
| cOR51I1_CD  | 534          | T             | C             |
| cOR5M19_CD  | 339          | T             | C             |
| cOR12E2_CD  | 525          | G             | T             |
| cOR7A29P_Ps | 193          | G             | C             |
| cOR2Z2_CD   | 405          | C             | T             |
| cOR8K7_CD   | 730          | G             | C             |
| cOR4A26_CD  | 665          | C             | A             |
| cOR8S20_CD  | 609          | A             | G             |
| cOR12E4_CD  | 456          | A             | C             |
| cOR9S21_CD  | 111          | T             | C             |
| cOR5B30P_Ps | 947          | G             | T             |
| cOR5W8_CD   | 627          | C             | T             |
| cOR2D2P_Ps  | 215          | C             | T             |
| cOR52R3_CD  | 923          | A             | G             |

|              |     |   |   |
|--------------|-----|---|---|
| cOR10J11P_Ps | 377 | A | G |
| cOR51B11P_Ps | 182 | T | C |
| cOR8D7_CD    | 201 | A | C |
| cOR52H7_CD   | 285 | C | T |
| cOR10H7_CD   | 455 | T | C |
| cOR5B25_CD   | 142 | C | G |
| cOR6C87P_Ps  | 520 | C | G |
| cOR4X3P_Ps   | 311 | G | T |
| cOR8V12P_Ps  | 496 | G | T |
| cOR6C59P_Ps  | 84  | A | T |
| cOR11S1_CD   | 564 | T | C |
| cOR13N4_CD   | 354 | G | A |
| cOR5AR1_CD   | 266 | A | G |
| cOR2A39_CD   | 819 | T | C |
| cOR9S22P_Ps  | 78  | T | C |
| cOR2AG1_CD   | 853 | C | T |
| cOR5D14_CD   | 707 | C | T |
| cOR1D10P_Ps  | 724 | C | T |
| cOR5I1_CD    | 513 | C | T |
| cOR5H9_CD    | 564 | C | T |
| cOR10H20_CD  | 66  | C | T |
| cOR52J7_CD   | 435 | C | G |
| cOR10V6_CD   | 477 | A | G |
| cOR6C59P_Ps  | 68  | C | A |
| cOR55B3P_Ps  | 438 | A | G |
| cOR2A35_CD   | 293 | C | T |
| cOR6AB1P_Ps  | 916 | T | A |
| cOR6B7_CD    | 122 | A | G |
| cOR56A15_CD  | 900 | C | G |
| cOR13C17P_Ps | 652 | C | T |
| cOR4X7_CD    | 758 | G | T |
| cOR7C36_CD   | 752 | A | C |
| cOR4V4_CD    | 290 | C | T |
| cOR8B15P_Ps  | 955 | A | G |
| cOR8B22P_Ps  | 507 | A | G |
| cOR52R3_CD   | 446 | T | C |
| cOR56A12P_Ps | 31  | A | G |
| cOR56A24_CD  | 591 | C | T |
| cOR4C32P_Ps  | 327 | T | C |
| cOR6D5_CD    | 777 | T | C |
| cOR10H7_CD   | 213 | A | G |
| cOR7A24P_Ps  | 477 | A | G |
| cOR1L6_CD    | 627 | C | G |
| cOR12E1_CD   | 768 | T | A |
| cOR6M8_CD    | 307 | A | G |
| cOR52AB2_CD  | 770 | A | G |
| cOR56A12P_Ps | 617 | G | A |
| cOR9A7_CD    | 118 | A | G |

|              |     |   |   |
|--------------|-----|---|---|
| cOR6C43_CD   | 696 | C | T |
| cOR2F3_CD    | 159 | C | G |
| cOR8S17_CD   | 658 | C | T |
| cOR9S26P_Ps  | 653 | A | T |
| cOR9S8P_Ps   | 608 | T | G |
| cOR2W14_CD   | 555 | T | C |
| cOR7C48_CD   | 367 | C | T |
| cOR2A37_CD   | 966 | C | T |
| cOR4N7_CD    | 273 | G | A |
| cOR2AG1_CD   | 837 | G | A |
| cOR52Z2_CD   | 604 | T | G |
| cOR2AG8P_Ps  | 160 | T | C |
| cOR4Y4_CD    | 324 | C | T |
| cOR5AN3P_Ps  | 206 | G | T |
| cOR2D12_CD   | 126 | C | T |
| cOR8B15P_Ps  | 834 | G | A |
| cOR5T9P_Ps   | 934 | C | T |
| cOR2D2P_Ps   | 248 | G | C |
| cOR12E8_CD   | 247 | C | T |
| cOR52AC1_CD  | 491 | G | A |
| cOR4C40_CD   | 222 | G | T |
| cOR13M1P_Ps  | 250 | T | C |
| cOR7E153_CD  | 21  | C | T |
| cOR8B15P_Ps  | 851 | A | G |
| cOR7D5_CD    | 940 | T | G |
| cOR8S11P_Ps  | 55  | A | C |
| cOR10H20_CD  | 609 | A | G |
| cOR6Z3_CD    | 188 | T | C |
| cOR7D5_CD    | 766 | G | T |
| cOR1A4_CD    | 496 | A | C |
| cOR10H10_CD  | 90  | T | C |
| cOR9K9P_Ps   | 618 | A | T |
| cOR51L2P_Ps  | 439 | T | C |
| cOR4C21_CD   | 261 | C | T |
| cOR55B4P_Ps  | 809 | A | G |
| cOR7C45_CD   | 73  | A | C |
| cOR8D5_CD    | 834 | T | C |
| cOR51G1_CD   | 593 | G | A |
| cOR2F4P_Ps   | 313 | T | C |
| cOR7G10_CD   | 450 | T | C |
| cOR9S11P_Ps  | 486 | T | C |
| cOR3A9_CD    | 804 | G | A |
| cOR4C40_CD   | 548 | A | G |
| cOR9G1P_Ps   | 368 | T | C |
| cOR6M4P_Ps   | 860 | T | C |
| cOR7D4_CD    | 817 | G | A |
| cOR2T18_CD   | 725 | T | C |
| cOR13C20P_Ps | 168 | C | T |

|              |     |   |   |
|--------------|-----|---|---|
| cOR12E4_CD   | 405 | T | C |
| cOR4C26P_Ps  | 60  | T | C |
| cOR12E8_CD   | 558 | C | T |
| cOR7G10_CD   | 924 | A | G |
| cOR10H9_CD   | 234 | C | T |
| cOR13N4_CD   | 24  | T | C |
| cOR6C79P_Ps  | 425 | A | G |
| cOR6D5_CD    | 471 | T | C |
| cOR8K1_CD    | 266 | T | C |
| cOR4A4_CD    | 90  | G | A |
| cOR8S14_CD   | 726 | T | C |
| cOR7H3_CD    | 235 | A | C |
| cOR13C17P_Ps | 613 | G | A |
| cOR2W13P_Ps  | 199 | C | T |
| cOR5M19_CD   | 303 | C | T |
| cOR9S17_CD   | 190 | T | C |
| cOR4F31P_Ps  | 458 | G | A |
| cOR8V4_CD    | 409 | G | A |
| cOR4C26P_Ps  | 305 | C | T |
| cOR5B34_CD   | 153 | T | C |
| cOR4X4_CD    | 444 | C | T |
| cOR4X3P_Ps   | 186 | T | C |
| cOR7C10P_Ps  | 310 | T | C |
| cOR5AN4_CD   | 867 | T | C |
| cOR52E8_CD   | 444 | C | G |
| cOR5B34_CD   | 258 | G | A |
| cOR10H20_CD  | 251 | G | A |
| cOR7G9_CD    | 822 | C | T |
| cOR6K5_CD    | 770 | C | T |
| cOR4Q4_CD    | 996 | A | G |
| cOR4C59_CD   | 583 | A | C |
| cOR6V2_CD    | 762 | A | G |
| cOR2AG1_CD   | 656 | T | C |
| cOR52A13P_Ps | 309 | A | G |
| cOR6C25P_Ps  | 732 | A | C |
| cOR51A19_CD  | 777 | C | T |
| cOR2A43_CD   | 102 | C | T |
| cOR7A29P_Ps  | 98  | T | C |
| cOR8V11_CD   | 623 | G | T |
| cOR8V11_CD   | 180 | T | C |
| cOR9S5_CD    | 572 | T | A |
| cOR8B15P_Ps  | 523 | C | T |
| cOR4Z3_CD    | 702 | T | C |
| cOR9S22P_Ps  | 558 | A | G |
| cOR13C20P_Ps | 436 | A | G |
| cOR5M12_CD   | 959 | T | C |
| cOR52E2_CD   | 115 | G | A |
| cOR13J2_CD   | 951 | A | G |

|              |     |   |   |
|--------------|-----|---|---|
| cOR4C32P_Ps  | 363 | G | C |
| cOR2A35_CD   | 407 | A | G |
| cOR5B34_CD   | 498 | C | T |
| cOR56A12P_Ps | 813 | G | A |
| cOR2A37_CD   | 808 | A | C |
| cOR8S14_CD   | 512 | C | G |
| cOR4C30P_Ps  | 568 | T | C |
| cOR10H7_CD   | 564 | T | C |
| cOR4C30P_Ps  | 767 | C | T |
| cOR4A51_CD   | 786 | T | C |
| cOR5T4P_Ps   | 253 | A | G |
| cOR6C40P_Ps  | 351 | G | C |
| cOR7H3_CD    | 314 | C | A |
| cOR4C42P_Ps  | 607 | T | C |
| cOR8V11_CD   | 138 | T | C |
| cOR6C89_CD   | 192 | C | T |
| cOR2A33_CD   | 912 | A | G |
| cOR5B33P_Ps  | 725 | C | G |
| cOR10J20_CD  | 87  | T | C |
| cOR4C63P_Ps  | 691 | G | A |
| cOR7C34_CD   | 287 | G | A |
| cOR1E12_CD   | 578 | T | A |
| cOR4A4_CD    | 870 | T | G |
| cOR2AG9_CD   | 499 | C | G |
| cOR4C59_CD   | 221 | T | C |
| cOR10Q5_CD   | 708 | C | T |
| cOR6B4_CD    | 75  | C | T |
| cOR8V6_CD    | 400 | C | G |
| cOR7D5_CD    | 918 | A | G |
| cOR8V12P_Ps  | 366 | T | C |
| cOR11K3P_Ps  | 386 | C | T |
| cOR7C48_CD   | 231 | T | C |
| cOR2T24_CD   | 429 | C | A |
| cOR9S5_CD    | 514 | T | C |
| cOR7E152_CD  | 758 | G | A |
| cOR52Z3_CD   | 147 | T | C |
| cOR11G6P_Ps  | 342 | A | C |
| cOR13F4_CD   | 90  | A | G |
| cOR2D12_CD   | 312 | T | C |
| cOR6D6_CD    | 243 | C | T |
| cOR9S8P_Ps   | 194 | C | T |
| cOR7A29P_Ps  | 130 | G | A |
| cOR10H20_CD  | 579 | A | T |
| cOR51G1_CD   | 926 | G | T |
| cOR12E8_CD   | 726 | G | A |
| cOR52AB5P_Ps | 868 | G | A |
| cOR7G6_CD    | 436 | C | T |
| cOR7G9_CD    | 720 | G | T |

|              |      |   |   |
|--------------|------|---|---|
| cOR51B11P_Ps | 806  | A | G |
| cOR51B11P_Ps | 479  | A | T |
| cOR9S10_CD   | 456  | T | C |
| cOR9S21_CD   | 10   | T | C |
| cOR52E20_CD  | 102  | A | G |
| cOR8S9_CD    | 114  | T | C |
| cOR5AN3P_Ps  | 506  | T | C |
| cOR10J7P_Ps  | 781  | T | C |
| cOR6M8_CD    | 391  | T | C |
| cOR10H7_CD   | 155  | T | C |
| cOR8J4P_Ps   | 54   | T | C |
| cOR2Z6_CD    | 249  | C | T |
| cOR52H3_CD   | 332  | G | A |
| cOR2A39_CD   | 779  | T | C |
| cOR51H4_CD   | 429  | G | C |
| cOR10J24P_Ps | 250  | C | T |
| cOR6C89_CD   | 252  | A | G |
| cOR51L2P_Ps  | 294  | A | G |
| cOR8B22P_Ps  | 589  | A | G |
| cOR4C29_CD   | 592  | A | G |
| cOR8S9_CD    | 643  | T | A |
| cOR4C42P_Ps  | 803  | A | G |
| cOR51B4P_Ps  | 215  | A | G |
| cOR4F30P_Ps  | 380  | C | T |
| cOR51A23_CD  | 425  | C | T |
| cOR13M2_CD   | 571  | G | A |
| cOR4X3P_Ps   | 291  | T | C |
| cOR7G9_CD    | 13   | A | G |
| cOR8K1_CD    | 774  | T | C |
| cOR8S14_CD   | 472  | A | G |
| cOR5AN7_CD   | 419  | T | C |
| cOR3A9_CD    | 413  | G | A |
| cOR10A5_CD   | 456  | A | C |
| cOR13N3_CD   | 318  | T | G |
| cOR13C14_CD  | 378  | T | C |
| cOR56A8_CD   | 50   | C | T |
| cOR56A21P_Ps | 225  | T | C |
| cOR4C21_CD   | 468  | C | T |
| cOR52J5_CD   | 828  | A | G |
| cOR9S3P_Ps   | 704  | A | T |
| cOR52S3P_Ps  | 1022 | C | T |
| cOR4C59_CD   | 124  | G | T |
| cOR6C22P_Ps  | 316  | G | A |
| cOR7C51_CD   | 57   | A | G |
| cOR52H2_CD   | 291  | C | T |
| cOR5BA2_CD   | 30   | C | T |
| cOR1D12P_Ps  | 204  | C | T |
| cOR4Z4P_Ps   | 884  | G | T |

|              |     |   |   |
|--------------|-----|---|---|
| cOR2D7_CD    | 914 | A | G |
| cOR12E8_CD   | 85  | C | A |
| cOR10H20_CD  | 127 | G | A |
| cOR2D7_CD    | 280 | C | T |
| cOR52M1_CD   | 270 | C | T |
| cOR13M5P_Ps  | 83  | C | T |
| cOR8S14_CD   | 432 | G | A |
| cOR5D14_CD   | 921 | T | A |
| cOR1I2_CD    | 543 | T | C |
| cOR5AN3P_Ps  | 698 | C | T |
| cOR6P1_CD    | 27  | T | C |
| cOR1L6_CD    | 648 | T | C |
| cOR9S5_CD    | 219 | C | T |
| cOR13C15_CD  | 81  | G | A |
| cOR12E7_CD   | 674 | A | C |
| cOR56A12P_Ps | 591 | C | T |
| cOR7D4_CD    | 49  | T | C |
| cOR7C41P_Ps  | 232 | G | A |
| cOR8H4_CD    | 24  | C | G |
| cOR9S5_CD    | 414 | C | G |
| cOR51K1_CD   | 275 | A | G |
| cOR51A19_CD  | 215 | C | T |
| cOR12E1_CD   | 922 | T | C |
| cOR8V6_CD    | 778 | C | G |
| cOR5H9_CD    | 757 | A | G |
| cOR56A8_CD   | 376 | G | A |
| cOR6B6_CD    | 176 | A | T |
| cOR12E2_CD   | 201 | T | C |
| cOR4C63P_Ps  | 704 | C | A |
| cOR4D13_CD   | 77  | C | T |
| cOR6D6_CD    | 99  | A | G |
| cOR6D4P_Ps   | 967 | A | T |
| cOR7C51_CD   | 898 | T | C |
| cOR7C36_CD   | 840 | A | G |
| cOR56A25_CD  | 645 | G | C |
| cOR5I2_CD    | 36  | T | C |
| cOR52H4_CD   | 180 | G | A |
| cOR8H4_CD    | 149 | A | G |
| cOR3A9_CD    | 446 | C | T |
| cOR2A32_CD   | 735 | C | T |
| cOR4C66P_Ps  | 391 | T | C |
| cOR2A32_CD   | 396 | A | T |
| cOR6D7_CD    | 840 | A | G |
| cOR4C59_CD   | 184 | C | A |
| cOR7G14_CD   | 691 | A | G |
| cOR10H18_CD  | 834 | G | A |
| cOR51V2P_Ps  | 291 | A | G |
| cOR6Z1_CD    | 399 | T | A |

|             |     |   |   |
|-------------|-----|---|---|
| cOR12E4_CD  | 519 | A | G |
| cOR8B22P_Ps | 616 | A | G |
| cOR6M4P_Ps  | 563 | A | G |
| cOR5I2_CD   | 867 | A | G |
| cOR8D7_CD   | 250 | A | G |
| cOR8S9_CD   | 948 | C | T |
| cOR52M5_CD  | 518 | A | G |
| cOR5AQ2_CD  | 501 | C | T |
| cOR10V5_CD  | 351 | T | C |
| cOR51Q1_CD  | 842 | A | G |
| cOR7D5_CD   | 737 | C | T |
| cOR5AN3P_Ps | 743 | C | A |
| cOR52U3_CD  | 515 | G | C |
| cOR2T24_CD  | 394 | G | A |
| cOR2T24_CD  | 324 | C | T |
| cOR6D4P_Ps  | 923 | C | A |
| cOR2D12_CD  | 15  | T | C |
| cOR6M4P_Ps  | 647 | T | C |
| cOR8H4_CD   | 651 | C | T |
| cOR4A34_CD  | 456 | G | T |
| cOR6C95P_Ps | 225 | G | A |
| cOR7H3_CD   | 971 | A | G |
| cOR9S22P_Ps | 528 | T | A |
| cOR5D24P_Ps | 86  | G | A |
| cOR9S8P_Ps  | 351 | C | G |
| cOR12E2_CD  | 41  | C | T |
| cOR12E4_CD  | 654 | G | C |
| cOR51K2_CD  | 483 | C | T |
| cOR52B2P_Ps | 10  | T | C |
| cOR7C41P_Ps | 174 | T | C |
| cOR9S3P_Ps  | 417 | T | G |
| cOR4C59_CD  | 390 | C | T |
| cOR7C8P_Ps  | 943 | A | C |
| cOR12E4_CD  | 372 | T | C |
| cOR5D14_CD  | 855 | T | C |
| cOR7C36_CD  | 288 | C | T |
| cOR4X3P_Ps  | 529 | C | T |
| cOR6B4_CD   | 375 | T | C |
| cOR2AG1_CD  | 897 | G | A |
| cOR5D23_CD  | 103 | T | A |
| cOR4F31P_Ps | 507 | G | A |
| cOR8J4P_Ps  | 183 | A | G |
| cOR7G9_CD   | 367 | A | G |
| cOR51J3_CD  | 663 | C | T |
| cOR5AL1_CD  | 764 | A | C |
| cOR4C23P_Ps | 381 | G | A |
| cOR8S15_CD  | 129 | G | T |
| cOR52K6_CD  | 576 | G | A |



|              |     |   |   |
|--------------|-----|---|---|
| cOR12E8_CD   | 294 | T | C |
| cOR5AN5P_Ps  | 461 | T | C |
| cOR6C61P_Ps  | 440 | T | G |
| cOR6N3_CD    | 546 | A | G |
| cOR5B26_CD   | 123 | A | G |
| cOR52H2_CD   | 127 | G | A |
| cOR56A12P_Ps | 847 | A | C |
| cOR10H15P_Ps | 143 | A | G |
| cOR10J12_CD  | 282 | G | A |
| cOR7E152_CD  | 276 | T | C |
| cOR7G9_CD    | 789 | G | A |
| cOR2T20_CD   | 156 | T | C |
| cOR4C59_CD   | 419 | G | A |
| cOR8S10_CD   | 264 | G | A |
| cOR4A29_CD   | 570 | G | A |
| cOR6F2_CD    | 794 | T | C |
| cOR7G5_CD    | 781 | T | C |
| cOR51L2P_Ps  | 90  | A | G |
| cOR5BC2P_Ps  | 39  | G | T |
| cOR4Y3_CD    | 124 | T | A |
| cOR5M24P_Ps  | 313 | A | G |
| cOR7G8_CD    | 623 | G | C |
| cOR7A29P_Ps  | 76  | A | C |
| cOR5I2_CD    | 159 | A | C |
| cOR8S14_CD   | 398 | A | G |
| cOR51E2_CD   | 963 | C | G |
| cOR5B30P_Ps  | 340 | A | G |
| cOR10H9_CD   | 714 | A | C |
| cOR5B30P_Ps  | 496 | G | C |
| cOR10A5_CD   | 591 | A | G |
| cOR7A29P_Ps  | 169 | T | C |
| cOR8B15P_Ps  | 704 | T | C |
| cOR6AE1_CD   | 628 | G | C |
| cOR52N7_CD   | 783 | C | T |
| cOR52R2P_Ps  | 490 | A | T |
| cOR2AG1_CD   | 800 | G | A |
| cOR52M5_CD   | 155 | A | C |
| cOR2B2_CD    | 920 | A | G |
| cOR7G14_CD   | 839 | T | C |
| cOR4X3P_Ps   | 511 | C | T |
| cOR4V2P_Ps   | 900 | T | C |
| cOR6C87P_Ps  | 261 | A | G |
| cOR5B26_CD   | 75  | T | C |
| cOR10J19_CD  | 16  | A | G |
| cOR52K6_CD   | 423 | C | T |
| cOR2G4P_Ps   | 170 | T | C |
| cOR5B30P_Ps  | 934 | A | C |
| cOR5B25_CD   | 54  | C | A |

|             |     |   |   |
|-------------|-----|---|---|
| cOR5AN5P_Ps | 290 | A | G |
| cOR8K7_CD   | 631 | T | C |
| cOR1M1_CD   | 95  | C | T |
| cOR6C94P_Ps | 103 | G | A |
| cOR2AG9_CD  | 536 | A | T |
| cOR8B15P_Ps | 580 | T | C |
| cOR7G9_CD   | 44  | A | G |
| cOR2AG8P_Ps | 455 | G | A |
| cOR4C44P_Ps | 252 | C | T |
| cOR5H9_CD   | 496 | T | C |
| cOR4C53_CD  | 435 | G | A |
| cOR5K7_CD   | 611 | A | G |
| cOR8V6_CD   | 360 | T | C |
| cOR8S20_CD  | 541 | G | T |
| cOR2D2P_Ps  | 180 | T | C |
| cOR8S17_CD  | 618 | T | C |
| cOR51B10_CD | 190 | C | T |
| cOR4C22P_Ps | 227 | G | A |
| cOR1A4_CD   | 364 | G | C |
| cOR3A11_CD  | 66  | C | G |
| cOR12E8_CD  | 47  | C | T |
| cOR51G1_CD  | 283 | A | G |
| cOR2D9_CD   | 204 | T | C |
| cOR5M18_CD  | 507 | G | C |
| cOR2AT5P_Ps | 382 | G | A |
| cOR6F2_CD   | 765 | C | T |
| cOR2AK3_CD  | 145 | A | C |
| cOR5D24P_Ps | 272 | C | T |
| cOR51V7P_Ps | 111 | T | C |
| cOR4X3P_Ps  | 77  | A | G |
| cOR8D5_CD   | 414 | G | C |
| cOR7G9_CD   | 888 | T | C |
| cOR1M1_CD   | 691 | G | T |
| cOR5AQ2_CD  | 637 | A | G |
| cOR4C1_CD   | 240 | A | C |
| cOR5H10_CD  | 522 | C | T |
| cOR6C59P_Ps | 302 | C | T |
| cOR5B33P_Ps | 707 | G | A |
| cOR52U2_CD  | 463 | C | A |
| cOR52B6_CD  | 63  | C | T |
| cOR9S5_CD   | 765 | C | A |
| cOR6D4P_Ps  | 60  | A | G |
| cOR6N3_CD   | 929 | A | G |
| cOR2D8_CD   | 518 | C | T |
| cOR56A8_CD  | 300 | T | C |
| cOR6C19P_Ps | 133 | G | A |
| cOR2A32_CD  | 822 | T | C |
| cOR6K10_CD  | 630 | C | T |

|              |     |   |   |
|--------------|-----|---|---|
| cOR4C62P_Ps  | 453 | C | T |
| cOR9Q3_CD    | 822 | A | C |
| cOR12E4_CD   | 780 | A | G |
| cOR2T24_CD   | 343 | T | A |
| cOR4N6_CD    | 913 | A | C |
| cOR2D7_CD    | 810 | T | G |
| cOR5AL1_CD   | 397 | G | A |
| cOR52J7_CD   | 525 | C | T |
| cOR52AB5P_Ps | 59  | C | A |
| cOR4C42P_Ps  | 784 | A | T |
| cOR5B25_CD   | 413 | T | A |
| cOR5H16_CD   | 254 | G | A |
| cOR11H11_CD  | 527 | G | A |
| cOR52E2_CD   | 78  | C | T |
| cOR10T4_CD   | 33  | A | G |
| cOR4B4_CD    | 418 | T | C |
| cOR5C1_CD    | 771 | A | G |
| cOR9S23_CD   | 531 | T | C |
| cOR6B6_CD    | 634 | T | A |
| cOR4X3P_Ps   | 745 | T | A |
| cOR5W8_CD    | 696 | G | A |
| cOR52N7_CD   | 570 | T | C |
| cOR6C11_CD   | 920 | C | T |
| cOR5T8_CD    | 897 | T | A |
| cOR51K2_CD   | 297 | A | G |
| cOR11H8_CD   | 84  | T | C |
| cOR11G11_CD  | 312 | A | G |
| cOR52E2_CD   | 847 | A | G |
| cOR8S9_CD    | 621 | C | T |
| cOR51I1_CD   | 636 | C | T |
| cOR4A39_CD   | 924 | T | A |
| cOR11J3_CD   | 693 | A | G |
| cOR7C5P_Ps   | 665 | T | C |
| cOR56A15_CD  | 775 | T | C |
| cOR4Q8P_Ps   | 701 | G | T |
| cOR52A8_CD   | 458 | A | G |
| cOR5T8_CD    | 33  | C | T |
| cOR56A12P_Ps | 760 | G | C |
| cOR2A32_CD   | 718 | T | A |
| cOR8I3_CD    | 44  | T | C |
| cOR11G6P_Ps  | 59  | A | C |
| cOR8K1_CD    | 327 | C | T |
| cOR5B33P_Ps  | 551 | A | G |
| cOR6F2_CD    | 95  | C | T |
| cOR1S3P_Ps   | 268 | T | A |
| cOR1A4_CD    | 473 | C | T |
| cOR51I1_CD   | 398 | G | C |
| cOR4A53_CD   | 295 | T | C |

|              |     |   |   |
|--------------|-----|---|---|
| cOR10H15P_Ps | 575 | T | G |
| cOR8S9_CD    | 510 | G | A |
| cOR2D11_CD   | 612 | T | C |
| cOR7D5_CD    | 848 | T | G |
| cOR7G6_CD    | 335 | T | A |
| cOR51B4P_Ps  | 906 | T | C |
| cOR12E2_CD   | 873 | T | C |
| cOR8C7_CD    | 637 | A | T |
| cOR51J3_CD   | 534 | G | A |
| cOR4A51_CD   | 561 | T | C |
| cOR6C30_CD   | 265 | T | C |
| cOR2G4P_Ps   | 28  | G | C |
| cOR52AD1_CD  | 529 | T | G |
| cOR51K1_CD   | 112 | G | A |
| cOR6K7_CD    | 702 | T | C |
| cOR8B22P_Ps  | 578 | T | C |
| cOR9S21_CD   | 892 | T | C |
| cOR51V9_CD   | 498 | T | C |
| cOR9I4P_Ps   | 158 | A | G |
| cOR56A15_CD  | 177 | C | T |
| cOR52U2_CD   | 298 | G | A |
| cOR56A15_CD  | 876 | T | C |
| cOR52I2_CD   | 816 | G | A |
| cOR2T24_CD   | 297 | C | A |
| cOR6M4P_Ps   | 42  | A | G |
| cOR4Q8P_Ps   | 672 | G | A |
| cOR5I2_CD    | 502 | T | C |
| cOR52H8P_Ps  | 145 | A | G |
| cOR7A29P_Ps  | 129 | G | A |
| cOR8I3_CD    | 417 | G | T |
| cOR4A51_CD   | 588 | C | T |
| cOR8S9_CD    | 480 | C | T |
| cOR51B4P_Ps  | 104 | T | C |
| cOR7G10_CD   | 424 | A | G |
| cOR13AM1P_Ps | 809 | T | C |
| cOR8K1_CD    | 132 | G | A |
| cOR7C6_CD    | 849 | G | C |
| cOR5J4_CD    | 378 | T | C |
| cOR7G14_CD   | 349 | G | C |
| cOR7C27_CD   | 808 | T | A |
| cOR6D4P_Ps   | 935 | C | T |
| cOR12E2_CD   | 100 | G | A |
| cOR7E153_CD  | 774 | C | T |
| cOR13M1P_Ps  | 279 | T | C |
| cOR5AN3P_Ps  | 463 | A | C |
| cOR52B6_CD   | 204 | T | C |
| cOR7E153_CD  | 333 | C | T |
| cOR5D14_CD   | 300 | C | T |

|              |     |   |   |
|--------------|-----|---|---|
| cOR52N6_CD   | 764 | C | G |
| cOR1D12P_Ps  | 507 | C | A |
| cOR6C84P_Ps  | 302 | C | T |
| cOR4A55_CD   | 552 | T | C |
| cOR3A9_CD    | 546 | C | T |
| cOR7C35_CD   | 294 | T | C |
| cOR6C30_CD   | 218 | T | G |
| cOR9S8P_Ps   | 623 | G | C |
| cOR7C7_CD    | 523 | T | C |
| cOR12E8_CD   | 229 | A | C |
| cOR7D4_CD    | 303 | A | G |
| cOR6AE1_CD   | 915 | T | A |
| cOR5T5_CD    | 103 | A | G |
| cOR6C79P_Ps  | 515 | T | C |
| cOR11G6P_Ps  | 380 | T | C |
| cOR9G1P_Ps   | 552 | C | A |
| cOR52E23_CD  | 387 | T | C |
| cOR8V12P_Ps  | 816 | C | T |
| cOR10H7_CD   | 888 | T | C |
| cOR9S22P_Ps  | 186 | G | A |
| cOR5AN4_CD   | 586 | A | T |
| cOR5T4P_Ps   | 735 | A | T |
| cOR11H11_CD  | 488 | A | G |
| cOR4H13_CD   | 951 | C | T |
| cOR8S9_CD    | 711 | C | T |
| cOR4C42P_Ps  | 814 | G | C |
| cOR2F4P_Ps   | 544 | T | C |
| cOR7G10_CD   | 391 | T | C |
| cOR9S5_CD    | 925 | T | C |
| cOR5AN5P_Ps  | 731 | T | C |
| cOR7G14_CD   | 441 | C | G |
| cOR52H5_CD   | 363 | C | T |
| cOR51K2_CD   | 555 | T | C |
| cOR9S26P_Ps  | 930 | C | A |
| cOR10J11P_Ps | 260 | T | C |
| cOR2AG9_CD   | 398 | C | A |
| cOR4K20_CD   | 18  | T | C |
| cOR7G5_CD    | 894 | C | T |
| cOR52AC1_CD  | 157 | C | T |
| cOR10A16_CD  | 428 | A | G |
| cOR4P6_CD    | 17  | T | C |
| cOR51I1_CD   | 505 | C | T |
| cOR8S11P_Ps  | 847 | A | T |
| cOR10Q5_CD   | 530 | A | G |
| cOR4Q8P_Ps   | 653 | A | G |
| cOR12G1_CD   | 972 | A | T |
| cOR51I5_CD   | 333 | C | G |
| cOR4Y5_CD    | 472 | A | G |

|              |     |   |   |
|--------------|-----|---|---|
| cOR7G12_CD   | 838 | A | G |
| cOR6U3_CD    | 697 | G | T |
| cOR9S6_CD    | 252 | C | G |
| cOR12E8_CD   | 448 | A | G |
| cOR5AP4_CD   | 502 | C | A |
| cOR8S7_CD    | 258 | A | G |
| cOR56A8_CD   | 642 | T | C |
| cOR56A12P_Ps | 286 | G | A |
| cOR7E153_CD  | 46  | G | A |
| cOR2D9_CD    | 240 | C | T |
| cOR7C36_CD   | 379 | T | C |
| cOR5AK6P_Ps  | 147 | G | A |
| cOR2A39_CD   | 855 | A | C |
| cOR7G8_CD    | 418 | T | C |
| cOR8S9_CD    | 726 | C | T |
| cOR5AN3P_Ps  | 323 | A | C |
| cOR4C66P_Ps  | 349 | C | T |
| cOR52H5_CD   | 43  | C | T |
| cOR4C63P_Ps  | 475 | T | C |
| cOR1D11_CD   | 680 | T | C |
| cOR8B22P_Ps  | 854 | A | G |
| cOR2AT5P_Ps  | 177 | A | G |
| cOR2AT7_CD   | 494 | T | C |
| cOR6C87P_Ps  | 366 | G | C |
| cOR5I2_CD    | 453 | C | T |
| cOR5H9_CD    | 453 | A | T |
| cOR6M8_CD    | 604 | T | C |
| cOR5D21_CD   | 410 | C | T |
| cOR52K6_CD   | 480 | G | A |
| cOR5K8_CD    | 729 | A | T |
| cOR6C94P_Ps  | 483 | C | T |
| cOR5B30P_Ps  | 732 | T | G |
| cOR4Y5_CD    | 156 | T | C |
| cOR5AP3_CD   | 320 | C | A |
| cOR5F3_CD    | 114 | T | A |
| cOR51B11P_Ps | 212 | T | C |
| cOR52AC1_CD  | 343 | T | C |
| cOR7C15_CD   | 428 | C | T |
| cOR10J23_CD  | 487 | G | A |
| cOR7G14_CD   | 761 | A | C |
| cOR8S14_CD   | 246 | A | G |
| cOR52P4_CD   | 915 | C | T |
| cOR5D24P_Ps  | 345 | A | G |
| cOR9S8P_Ps   | 424 | A | G |
| cOR12E4_CD   | 168 | T | C |
| cOR4K19P_Ps  | 656 | T | C |
| cOR1E11_CD   | 114 | C | A |
| cOR52A13P_Ps | 45  | C | T |

|              |     |   |   |
|--------------|-----|---|---|
| cOR7C41P_Ps  | 635 | T | C |
| cOR51K2_CD   | 630 | C | T |
| cOR6C62_CD   | 289 | A | G |
| cOR2A32_CD   | 655 | T | C |
| cOR9S26P_Ps  | 688 | G | T |
| cOR52H2_CD   | 108 | T | C |
| cOR1A4_CD    | 344 | A | T |
| cOR7C36_CD   | 96  | T | A |
| cOR6B10_CD   | 504 | T | C |
| cOR52U2_CD   | 59  | G | C |
| cOR12E4_CD   | 744 | G | A |
| cOR10V6_CD   | 12  | G | A |
| cOR5L4_CD    | 612 | T | C |
| cOR8B3_CD    | 469 | T | C |
| cOR10H15P_Ps | 856 | T | C |
| cOR8S9_CD    | 590 | C | T |
| cOR5AN3P_Ps  | 608 | A | G |
| cOR52E2_CD   | 798 | A | C |
| cOR51E2_CD   | 450 | T | C |
| cOR8S12_CD   | 364 | T | C |
| cOR6Y3_CD    | 257 | T | G |
| cOR6C79P_Ps  | 536 | C | G |
| cOR2D7_CD    | 929 | T | C |
| cOR6B8_CD    | 928 | A | G |
| cOR8S11P_Ps  | 78  | T | C |
| cOR2F4P_Ps   | 191 | C | T |
| cOR6C79P_Ps  | 616 | G | C |
| cOR3A11_CD   | 413 | A | G |
| cOR8B15P_Ps  | 151 | T | C |
| cOR10J14_CD  | 282 | G | A |
| cOR51Q2P_Ps  | 178 | A | G |
| cOR8V12P_Ps  | 273 | C | A |
| cOR1A4_CD    | 841 | G | A |
| cOR9S8P_Ps   | 758 | A | G |
| cOR52X2_CD   | 502 | T | C |
| cOR10V6_CD   | 44  | A | G |
| cOR52U4_CD   | 840 | C | T |
| cOR1A4_CD    | 402 | G | A |
| cOR2D11_CD   | 378 | T | C |
| cOR5F3_CD    | 449 | C | T |
| cOR52H4_CD   | 501 | A | G |
| cOR56A8_CD   | 801 | A | G |
| cOR2D7_CD    | 882 | T | C |
| cOR9S10_CD   | 671 | G | A |
| cOR8K1_CD    | 495 | T | C |
| cOR8J4P_Ps   | 716 | C | A |
| cOR51B7_CD   | 216 | T | C |
| cOR5T4P_Ps   | 412 | A | T |

|              |      |   |   |
|--------------|------|---|---|
| cOR8B1_CD    | 923  | A | G |
| cOR52R3_CD   | 1125 | C | T |
| cOR5AK6P_Ps  | 39   | C | T |
| cOR4Q7_CD    | 442  | A | G |
| cOR2A37_CD   | 402  | C | T |
| cOR51H5_CD   | 455  | T | C |
| cOR4C1_CD    | 615  | C | G |
| cOR13N4_CD   | 426  | C | T |
| cOR7A22P_Ps  | 187  | A | C |
| cOR6N4_CD    | 451  | A | G |
| cOR10H20_CD  | 897  | C | T |
| cOR12E4_CD   | 697  | G | A |
| cOR7G10_CD   | 360  | C | T |
| cOR52A13P_Ps | 666  | T | C |
| cOR56A15_CD  | 401  | G | A |
| cOR12E1_CD   | 726  | C | A |
| cOR11K3P_Ps  | 948  | G | A |
| cOR5H9_CD    | 507  | T | C |
| cOR2F3_CD    | 133  | T | C |
| cOR10AC2_CD  | 330  | A | G |
| cOR10A5_CD   | 441  | C | T |
| cOR3A11_CD   | 688  | A | C |
| cOR13AM1P_Ps | 728  | A | T |
| cOR7G8_CD    | 447  | A | G |
| cOR4A33_CD   | 790  | G | A |
| cOR5B33P_Ps  | 38   | T | C |
| cOR1E12_CD   | 115  | A | G |
| cOR9S22P_Ps  | 915  | A | G |
| cOR5B29_CD   | 684  | T | C |
| cOR4F33P_Ps  | 894  | A | G |
| cOR56B12_CD  | 21   | C | T |
| cOR8V12P_Ps  | 106  | T | A |
| cOR52H2_CD   | 250  | G | A |
| cOR6C37_CD   | 603  | T | C |
| cOR4C1_CD    | 477  | T | G |
| cOR4C59_CD   | 786  | G | C |
| cOR52J6_CD   | 287  | C | A |
| cOR10J24P_Ps | 214  | T | C |
| cOR2D7_CD    | 414  | A | G |
| cOR2AG9_CD   | 53   | A | G |
| cOR6Z3_CD    | 270  | T | C |
| cOR6K10_CD   | 335  | C | A |
| cOR52S7P_Ps  | 563  | G | T |
| cOR4Y4_CD    | 390  | T | C |
| cOR51A14P_Ps | 704  | T | C |
| cOR3A9_CD    | 301  | C | T |
| cOR8U6_CD    | 114  | A | C |
| cOR56A17_CD  | 329  | G | A |



|             |     |   |   |
|-------------|-----|---|---|
| cOR9S22P_Ps | 751 | T | A |
| cOR10AD2_CD | 509 | A | G |
| cOR2A37_CD  | 723 | T | C |
| cOR4C54_CD  | 175 | T | C |
| cOR2AG1_CD  | 750 | T | G |
| cOR7C9P_Ps  | 535 | T | C |
| cOR5B30P_Ps | 670 | G | A |

---
