# Supplementary material for: Genome Analysis of the Domestic Dog (Korean Jindo) by Massively Parallel Sequencing
Source: PubMed Central journal article supplement — DNA Res. 2012 Apr 3;19(3):275–88. doi: 10.1093/dnares/dss011 (PMC3372376; doi:10.1093/dnares/dss011), 2012-04-03
Supplement: supp_dss011_dss011supp_table12.pdf [file supp_dss011_dss011supp_table12.pdf]

Supplementary Table 12. Heterozygous SNPs in olfactory receptor genes

| Gene name   | SNP position | base in Boxer | bases in Jindo |
|-------------|--------------|---------------|----------------|
| cOR9A10_CD  | 466          | C             | C/G            |
| cOR4E3_CD   | 717          | G             | A/G            |
| cOR9G7_CD   | 349          | A             | A/T            |
| cOR2H9P_Ps  | 512          | T             | C/T            |
| cOR4C29_CD  | 717          | C             | C/G            |
| cOR2H9P_Ps  | 619          | G             | C/G            |
| cOR10V5_CD  | 674          | T             | A/T            |
| cOR2T36_CD  | 121          | A             | A/T            |
| cOR56B5_CD  | 624          | T             | G/T            |
| cOR4A33_CD  | 868          | G             | A/G            |
| cOR6C60P_Ps | 573          | A             | A/G            |
| cOR5M12_CD  | 245          | T             | C/T            |
| cOR4C42P_Ps | 199          | G             | G/T            |
| cOR10R4_CD  | 624          | T             | C/T            |
| cOR4P7_CD   | 69           | C             | C/T            |
| cOR52R3_CD  | 529          | G             | C/G            |
| cOR52A9P_Ps | 1026         | C             | A/C            |
| cOR52V2_CD  | 196          | C             | A/C            |
| cOR2D10P_Ps | 783          | C             | A/C            |
| cOR10Q3_CD  | 968          | A             | A/G            |
| cOR13C25_CD | 437          | C             | C/T            |
| cOR52H5_CD  | 682          | C             | C/T            |
| cOR52AC1_CD | 228          | A             | A/T            |
| cOR4A39_CD  | 841          | A             | A/T            |
| cOR6K10_CD  | 966          | C             | C/T            |
| cOR11G12_CD | 426          | C             | A/C            |
| cOR6C8P_Ps  | 405          | A             | A/G            |
| cOR5T5_CD   | 76           | T             | C/T            |
| cOR52D4_CD  | 426          | C             | C/T            |
| cOR7C23_CD  | 597          | C             | C/T            |
| cOR1L8_CD   | 495          | C             | C/T            |
| cOR5D19_CD  | 459          | G             | A/G            |
| cOR13M5P_Ps | 318          | C             | C/G            |
| cOR10AA2_CD | 303          | G             | A/G            |
| cOR4L4_CD   | 93           | A             | A/C            |
| cOR11G7_CD  | 583          | G             | A/G            |
| cOR4A33_CD  | 429          | C             | C/T            |
| cOR52J6_CD  | 804          | T             | C/T            |
| cOR10K3_CD  | 333          | C             | C/T            |
| cOR52X3_CD  | 375          | T             | C/T            |
| cOR13P1_CD  | 226          | A             | A/G            |
| cOR11K4_CD  | 46           | T             | C/T            |
| cOR4S4_CD   | 276          | C             | A/C            |
| cOR2T19P_Ps | 659          | A             | A/G            |
| cOR10J7P_Ps | 209          | C             | C/T            |
| cOR4P9_CD   | 411          | T             | C/T            |

|             |      |   |     |
|-------------|------|---|-----|
| cOR5AN2_CD  | 452  | C | C/T |
| cOR52A9P_Ps | 1165 | A | A/G |
| cOR6C23P_Ps | 545  | A | A/G |
| cOR4A27P_Ps | 869  | A | A/T |
| cOR4C60P_Ps | 853  | C | A/C |
| cOR6C41P_Ps | 118  | T | C/T |
| cOR5AN2_CD  | 909  | C | C/G |
| cOR2T37_CD  | 223  | G | A/G |
| cOR4C54_CD  | 323  | C | C/T |
| cOR7C32_CD  | 28   | A | A/G |
| cOR10AD3_CD | 296  | C | C/T |
| cOR10AA2_CD | 261  | C | C/T |
| cOR1L10P_Ps | 628  | C | C/G |
| cOR6C78P_Ps | 604  | A | A/G |
| cOR52X2_CD  | 757  | C | C/T |
| cOR9A8_CD   | 320  | C | C/T |
| cOR4C57_CD  | 773  | A | A/G |
| cOR52A14_CD | 221  | C | C/T |
| cOR11H9_CD  | 406  | G | A/G |
| cOR1D8_CD   | 550  | C | C/T |
| cOR9S6_CD   | 320  | C | C/T |
| cOR51X1P_Ps | 346  | T | A/T |
| cOR3A12_CD  | 309  | G | A/G |
| cOR52A9P_Ps | 1045 | C | C/T |
| cOR52H4_CD  | 461  | G | A/G |
| cOR4C18_CD  | 918  | A | A/G |
| cOR2B10P_Ps | 598  | C | C/T |
| cOR4C53_CD  | 683  | C | C/T |
| cOR4C30P_Ps | 156  | T | C/T |
| cOR6C43_CD  | 428  | C | C/T |
| cOR8W1_CD   | 748  | A | A/G |
| cOR10A16_CD | 66   | G | G/T |
| cOR6B8_CD   | 65   | A | A/G |
| cOR51F6_CD  | 539  | C | A/C |
| cOR6C83_CD  | 767  | T | A/T |
| cOR10R6P_Ps | 283  | C | A/C |
| cOR7C9P_Ps  | 1096 | C | C/G |
| cOR10B1P_Ps | 228  | A | A/G |
| cOR4C32P_Ps | 859  | G | C/G |
| cOR4C54_CD  | 769  | A | A/T |
| cOR6B7_CD   | 504  | T | C/T |
| cOR7A24P_Ps | 503  | G | A/G |
| cOR5D23_CD  | 540  | A | A/G |
| cOR8U2_CD   | 189  | T | C/T |
| cOR6D5_CD   | 556  | T | C/T |
| cOR10Q3_CD  | 634  | A | A/C |
| cOR51A23_CD | 936  | A | A/G |
| cOR4A37P_Ps | 576  | G | A/G |

|             |      |   |     |
|-------------|------|---|-----|
| cOR5P6_CD   | 375  | C | A/C |
| cOR51X1P_Ps | 500  | T | C/T |
| cOR7C9P_Ps  | 1030 | T | G/T |
| cOR10AA2_CD | 658  | A | A/G |
| cOR4E1_CD   | 471  | A | A/C |
| cOR9A10_CD  | 805  | A | A/T |
| cOR4C52_CD  | 243  | C | A/C |
| cOR56A13_CD | 786  | T | C/T |
| cOR52N7_CD  | 842  | A | A/G |
| cOR4C56_CD  | 934  | A | A/T |
| cOR6C19P_Ps | 266  | C | C/T |
| cOR51L4P_Ps | 936  | C | C/G |
| cOR5M23_CD  | 303  | C | C/T |
| cOR51B4P_Ps | 527  | T | C/T |
| cOR2T36_CD  | 426  | C | C/T |
| cOR51K2_CD  | 866  | C | C/T |
| cOR51A23_CD | 57   | C | C/T |
| cOR52R2P_Ps | 113  | T | C/T |
| cOR4X5P_Ps  | 437  | C | C/T |
| cOR4L4_CD   | 106  | C | C/T |
| cOR4Q4_CD   | 636  | T | C/T |
| cOR51F6_CD  | 484  | T | G/T |
| cOR5W7_CD   | 210  | C | A/C |
| cOR7C10P_Ps | 887  | T | C/T |
| cOR4P6_CD   | 41   | T | C/T |
| cOR5P6_CD   | 227  | A | A/C |
| cOR10R4_CD  | 195  | C | C/T |
| cOR52N12_CD | 397  | C | A/C |
| cOR4P11_CD  | 100  | A | A/G |
| cOR4F33P_Ps | 519  | T | A/T |
| cOR5BW1P_Ps | 166  | G | A/G |
| cOR4C57_CD  | 586  | C | C/T |
| cOR56B2_CD  | 442  | G | A/G |
| cOR52H3_CD  | 561  | A | A/C |
| cOR4F24_CD  | 377  | T | C/T |
| cOR9S15_CD  | 512  | G | G/T |
| cOR7C30_CD  | 183  | C | C/T |
| cOR4C31_CD  | 840  | G | C/G |
| cOR4C53_CD  | 773  | G | A/G |
| cOR7C22_CD  | 384  | A | A/G |
| cOR4S7_CD   | 789  | A | A/G |
| cOR5W6_CD   | 295  | C | A/C |
| cOR9S16_CD  | 456  | C | C/T |
| cOR10R5_CD  | 620  | T | C/T |
| cOR11G1_CD  | 361  | A | A/G |
| cOR9A7_CD   | 926  | A | A/G |
| cOR5L7P_Ps  | 462  | G | A/G |
| cOR4A34_CD  | 1052 | C | A/C |

|              |     |   |     |
|--------------|-----|---|-----|
| cOR10A16_CD  | 586 | G | A/G |
| cOR6C14P_Ps  | 248 | A | A/G |
| cOR4P5_CD    | 673 | A | A/G |
| cOR5K5_CD    | 417 | A | A/G |
| cOR5D21_CD   | 717 | T | C/T |
| cOR52N8_CD   | 712 | G | A/G |
| cOR13M1P_Ps  | 874 | C | C/G |
| cOR9A10_CD   | 248 | G | A/G |
| cOR5D21_CD   | 908 | A | A/G |
| cOR51A19_CD  | 938 | T | C/T |
| cOR9S8P_Ps   | 470 | G | C/G |
| cOR9K10_CD   | 851 | C | C/T |
| cOR7C23_CD   | 26  | A | A/T |
| cOR2D5_CD    | 576 | T | C/T |
| cOR4Z5_CD    | 491 | C | C/T |
| cOR1S3P_Ps   | 632 | C | C/T |
| cOR2D4_CD    | 619 | C | A/C |
| cOR51A23_CD  | 578 | A | A/T |
| cOR11H9_CD   | 783 | T | C/T |
| cOR51F7_CD   | 246 | C | C/T |
| cOR10AD3_CD  | 428 | A | A/G |
| cOR7C41P_Ps  | 556 | A | A/C |
| cOR6C85_CD   | 14  | C | C/T |
| cOR52AE1_CD  | 828 | C | C/T |
| cOR10V5_CD   | 640 | A | A/C |
| cOR4C27_CD   | 790 | C | C/T |
| cOR6C56P_Ps  | 547 | G | A/G |
| cOR1D11_CD   | 333 | G | A/G |
| cOR6D5_CD    | 567 | T | C/T |
| cOR9S15_CD   | 618 | A | A/C |
| cOR5K6P_Ps   | 703 | C | C/T |
| cOR56B5_CD   | 641 | G | C/G |
| cOR1A4_CD    | 578 | A | A/C |
| cOR5M19_CD   | 927 | G | A/G |
| cOR6M7_CD    | 420 | A | A/C |
| cOR7C17_CD   | 67  | T | C/T |
| cOR10D8_CD   | 374 | C | C/T |
| cOR9A10_CD   | 703 | A | A/G |
| cOR52B8P_Ps  | 202 | T | C/T |
| cOR5H13_CD   | 97  | A | A/G |
| cOR6C54P_Ps  | 301 | G | A/G |
| cOR5T7_CD    | 27  | A | A/G |
| cOR6C48P_Ps  | 334 | C | C/T |
| cOR4A34_CD   | 980 | A | A/G |
| cOR51A14P_Ps | 552 | T | A/T |
| cOR7C55_CD   | 735 | G | A/G |
| cOR6C48P_Ps  | 241 | A | A/G |
| cOR2T16_CD   | 556 | C | C/T |

|              |      |   |     |
|--------------|------|---|-----|
| cOR9A7_CD    | 729  | C | C/T |
| cOR52S3P_Ps  | 36   | G | C/G |
| cOR7C38_CD   | 108  | C | C/G |
| cOR5L6_CD    | 33   | G | A/G |
| cOR10J14_CD  | 750  | C | C/T |
| cOR52A13P_Ps | 179  | T | C/T |
| cOR6C41P_Ps  | 232  | C | C/T |
| cOR2T13_CD   | 25   | C | C/T |
| cOR5H13_CD   | 170  | G | A/G |
| cOR2W16_CD   | 518  | G | A/G |
| cOR1K2_CD    | 654  | C | C/T |
| cOR6D4P_Ps   | 1015 | T | C/T |
| cOR5AN7_CD   | 528  | C | C/T |
| cOR52H5_CD   | 852  | A | A/T |
| cOR7C32_CD   | 156  | C | C/G |
| cOR51L4P_Ps  | 117  | A | A/T |
| cOR1J6P_Ps   | 202  | T | C/T |
| cOR1L8_CD    | 254  | G | A/G |
| cOR4C38P_Ps  | 727  | G | A/G |
| cOR4X5P_Ps   | 641  | A | A/G |
| cOR52A14_CD  | 668  | T | G/T |
| cOR56B10_CD  | 344  | G | C/G |
| cOR2AI2_CD   | 40   | C | C/T |
| cOR2T38_CD   | 88   | A | A/G |
| cOR4Q4_CD    | 1017 | A | A/G |
| cOR5W6_CD    | 618  | T | C/T |
| cOR10AA2_CD  | 582  | C | C/T |
| cOR5AN5P_Ps  | 337  | T | G/T |
| cOR52A20_CD  | 574  | G | A/G |
| cOR4A33_CD   | 517  | G | A/G |
| cOR5H12_CD   | 468  | A | A/C |
| cOR7C17_CD   | 524  | C | C/T |
| cOR6C85_CD   | 185  | A | A/G |
| cOR12J1_CD   | 152  | T | C/T |
| cOR13A2_CD   | 720  | C | C/T |
| cOR51A19_CD  | 324  | G | G/T |
| cOR2H9P_Ps   | 924  | G | C/G |
| cOR7C5P_Ps   | 550  | C | C/T |
| cOR51T2_CD   | 792  | T | C/T |
| cOR4C63P_Ps  | 145  | G | A/G |
| cOR5H13_CD   | 441  | C | C/T |
| cOR51Q2P_Ps  | 682  | G | C/G |
| cOR56B13_CD  | 534  | C | C/T |
| cOR52A15_CD  | 570  | G | A/G |
| cOR4G9_CD    | 410  | C | C/T |
| cOR51H5_CD   | 112  | G | A/G |
| cOR4Z5_CD    | 419  | T | C/T |
| cOR5K6P_Ps   | 382  | C | C/T |

|              |     |   |     |
|--------------|-----|---|-----|
| cOR6C35_CD   | 255 | A | A/G |
| cOR4A33_CD   | 404 | A | A/G |
| cOR52U4_CD   | 772 | C | C/T |
| cOR10H17P_Ps | 238 | G | G/T |
| cOR7D5_CD    | 998 | G | A/G |
| cOR7A25P_Ps  | 578 | T | C/T |
| cOR13D1_CD   | 631 | C | C/T |
| cOR4K22_CD   | 652 | G | G/T |
| cOR52R3_CD   | 409 | A | A/T |
| cOR52A20_CD  | 402 | T | C/T |
| cOR8V4_CD    | 470 | G | C/G |
| cOR2M11_CD   | 632 | C | C/T |
| cOR4Z4P_Ps   | 309 | A | A/G |
| cOR4Z4P_Ps   | 940 | G | A/G |
| cOR5L7P_Ps   | 474 | G | G/T |
| cOR52X3_CD   | 794 | G | A/G |
| cOR52A9P_Ps  | 721 | T | G/T |
| cOR12J1_CD   | 36  | A | A/G |
| cOR4C63P_Ps  | 129 | T | C/T |
| cOR6C94P_Ps  | 65  | T | G/T |
| cOR51J3_CD   | 792 | G | A/G |
| cOR5H13_CD   | 428 | C | C/T |
| cOR4S5_CD    | 489 | G | A/G |
| cOR52R3_CD   | 611 | C | C/T |
| cOR5BW1P_Ps  | 8   | G | A/G |
| cOR4A33_CD   | 195 | C | C/T |
| cOR4C64P_Ps  | 207 | C | C/T |
| cOR51Z1P_Ps  | 759 | G | A/G |
| cOR51F6_CD   | 933 | T | C/T |
| cOR56A13_CD  | 672 | C | C/T |
| cOR7C38_CD   | 792 | G | A/G |
| cOR10A16_CD  | 796 | T | C/T |
| cOR52A13P_Ps | 146 | G | A/G |
| cOR5T9P_Ps   | 923 | A | A/G |
| cOR56B5_CD   | 459 | T | C/T |
| cOR4C58_CD   | 458 | G | C/G |
| cOR6C41P_Ps  | 322 | G | G/T |
| cOR4A37P_Ps  | 256 | G | A/G |
| cOR10AJ2P_Ps | 455 | A | A/G |
| cOR4F30P_Ps  | 441 | G | A/G |
| cOR13P2_CD   | 606 | G | A/G |
| cOR13M5P_Ps  | 238 | G | C/G |
| cOR6Z1_CD    | 723 | C | C/T |
| cOR6C43_CD   | 717 | A | A/G |
| cOR10Q3_CD   | 845 | A | A/G |
| cOR5AC3_CD   | 705 | T | C/T |
| cOR4B1_CD    | 105 | A | A/C |
| cOR4B4_CD    | 513 | G | A/G |

|              |     |   |     |
|--------------|-----|---|-----|
| cOR10Q3_CD   | 813 | T | C/T |
| cOR4S5_CD    | 840 | G | G/T |
| cOR5H12_CD   | 529 | C | C/T |
| cOR7C18_CD   | 465 | G | A/G |
| cOR6W1_CD    | 784 | A | A/G |
| cOR1S3P_Ps   | 883 | T | C/T |
| cOR10H17P_Ps | 17  | A | A/G |
| cOR4C58_CD   | 117 | T | C/T |
| cOR1D11_CD   | 492 | C | A/C |
| cOR52E24_CD  | 695 | G | A/G |
| cOR4P7_CD    | 397 | C | A/C |
| cOR9Q4_CD    | 231 | C | C/T |
| cOR52D4_CD   | 678 | C | C/T |
| cOR10D8_CD   | 672 | C | C/T |
| cOR71_CD     | 876 | C | C/T |
| cOR52R3_CD   | 556 | G | A/G |
| cOR4A34_CD   | 535 | A | A/G |
| cOR2D11_CD   | 140 | A | A/G |
| cOR52A13P_Ps | 738 | G | A/G |
| cOR52R3_CD   | 30  | T | A/T |
| cOR4M3_CD    | 196 | C | C/T |
| cOR1D12P_Ps  | 183 | C | C/T |
| cOR2M9_CD    | 837 | T | C/T |
| cOR51B7_CD   | 507 | T | C/T |
| cOR56A13_CD  | 617 | C | C/G |
| cOR6C43_CD   | 384 | T | A/T |
| cOR52R2P_Ps  | 291 | G | A/G |
| cOR51B4P_Ps  | 341 | G | C/G |
| cOR5K8_CD    | 411 | G | A/G |
| cOR9S25P_Ps  | 942 | C | C/T |
| cOR4C62P_Ps  | 101 | T | A/T |
| cOR9S6_CD    | 889 | G | C/G |
| cOR7C44_CD   | 266 | G | C/G |
| cOR11K4_CD   | 645 | G | G/T |
| cOR7A24P_Ps  | 457 | C | C/G |
| cOR52A15_CD  | 208 | G | A/G |
| cOR4C62P_Ps  | 404 | T | C/T |
| cOR1AO1P_Ps  | 834 | T | C/T |
| cOR10J24P_Ps | 565 | A | A/G |
| cOR52A13P_Ps | 947 | A | A/G |
| cOR5AC3_CD   | 733 | T | C/T |
| cOR3A10_CD   | 775 | T | A/T |
| cOR52A19_CD  | 335 | T | C/T |
| cOR56B10_CD  | 283 | G | A/G |
| cOR5D23_CD   | 624 | A | A/G |
| cOR2AT8P_Ps  | 464 | A | A/G |
| cOR4C18_CD   | 568 | T | G/T |
| cOR4P5_CD    | 780 | C | A/C |

|             |      |   |     |
|-------------|------|---|-----|
| cOR10Q3_CD  | 609  | C | C/G |
| cOR1P1_CD   | 607  | G | C/G |
| cOR10AD1_CD | 621  | A | A/C |
| cOR4C52_CD  | 117  | A | A/G |
| cOR6C25P_Ps | 873  | C | C/T |
| cOR8J4P_Ps  | 555  | A | A/C |
| cOR51Z1P_Ps | 613  | T | C/T |
| cOR4A33_CD  | 442  | G | A/G |
| cOR12E7_CD  | 427  | A | A/G |
| cOR4A33_CD  | 360  | C | C/T |
| cOR8S12_CD  | 704  | A | A/G |
| cOR6D5_CD   | 374  | A | A/G |
| cOR2D4_CD   | 263  | T | A/T |
| cOR4H14_CD  | 67   | T | C/T |
| cOR4C42P_Ps | 267  | A | A/G |
| cOR51A24_CD | 710  | T | G/T |
| cOR51A24_CD | 922  | A | A/G |
| cOR4A28_CD  | 376  | C | C/T |
| cOR3A10_CD  | 378  | C | C/T |
| cOR10V6_CD  | 252  | C | C/T |
| cOR6C28P_Ps | 383  | A | A/T |
| cOR2A37_CD  | 828  | G | A/G |
| cOR10A8P_Ps | 553  | C | A/C |
| cOR4X5P_Ps  | 84   | T | C/T |
| cOR5BU2_CD  | 717  | C | C/T |
| cOR56B5_CD  | 483  | T | C/T |
| cOR6C43_CD  | 306  | T | C/T |
| cOR4A34_CD  | 295  | T | C/T |
| cOR5T7_CD   | 483  | G | A/G |
| cOR9Q4_CD   | 550  | C | C/T |
| cOR4C52_CD  | 366  | T | C/T |
| cOR10A16_CD | 1008 | T | C/T |
| cOR6C11_CD  | 364  | A | A/G |
| cOR51Q2P_Ps | 599  | G | G/T |
| cOR52E19_CD | 815  | A | A/G |
| cOR5T6_CD   | 108  | T | G/T |
| cOR2T20_CD  | 858  | T | C/T |
| cOR5H13_CD  | 521  | C | C/T |
| cOR51F6_CD  | 810  | T | G/T |
| cOR7C32_CD  | 508  | C | C/T |
| cOR4Q7_CD   | 692  | A | A/G |
| cOR4C52_CD  | 216  | A | A/G |
| cOR6K10_CD  | 936  | T | C/T |
| cOR10T3_CD  | 149  | G | A/G |
| cOR56A20_CD | 543  | C | C/T |
| cOR8D6_CD   | 118  | A | A/G |
| cOR1L6_CD   | 291  | C | C/T |
| cOR7C38_CD  | 132  | A | A/C |



|              |     |   |     |
|--------------|-----|---|-----|
| cOR2Z5P_Ps   | 802 | T | C/T |
| cOR52E25_CD  | 67  | C | C/G |
| cOR1L6_CD    | 327 | C | C/T |
| cOR4B3_CD    | 30  | A | A/G |
| cOR6K8_CD    | 285 | C | C/T |
| cOR8S7_CD    | 725 | C | C/T |
| cOR6C48P_Ps  | 147 | T | C/T |
| cOR2W9_CD    | 889 | A | A/G |
| cOR9G8_CD    | 717 | A | A/G |
| cOR4A27P_Ps  | 291 | A | A/C |
| cOR4C52_CD   | 589 | A | A/G |
| cOR11H7_CD   | 942 | C | C/G |
| cOR51H5_CD   | 324 | C | C/T |
| cOR2A7P_Ps   | 318 | G | A/G |
| cOR9S12P_Ps  | 418 | T | C/T |
| cOR52X2_CD   | 934 | A | A/G |
| cOR12J1_CD   | 630 | C | C/T |
| cOR11K4_CD   | 849 | C | C/T |
| cOR1P1_CD    | 703 | T | C/T |
| cOR6C41P_Ps  | 696 | G | A/G |
| cOR7C8P_Ps   | 213 | C | C/T |
| cOR52AB5P_Ps | 204 | G | A/G |
| cOR4Z2_CD    | 537 | C | C/T |
| cOR52AG1P_Ps | 932 | C | C/T |
| cOR10R4_CD   | 595 | A | A/G |
| cOR10A11_CD  | 237 | G | G/T |
| cOR52R2P_Ps  | 728 | G | A/G |
| cOR6K2_CD    | 618 | G | A/G |
| cOR9K9P_Ps   | 235 | T | A/T |
| cOR4Z4P_Ps   | 792 | T | C/T |
| cOR4C30P_Ps  | 318 | C | C/G |
| cOR5D20_CD   | 336 | G | G/T |
| cOR4C38P_Ps  | 668 | G | A/G |
| cOR2A37_CD   | 891 | G | C/G |
| cOR8V6_CD    | 385 | C | A/C |
| cOR5G1_CD    | 171 | G | A/G |
| cOR5K7_CD    | 234 | T | C/T |
| cOR4F22P_Ps  | 154 | A | A/G |
| cOR6C17_CD   | 647 | C | C/T |
| cOR1D11_CD   | 240 | T | C/T |
| cOR52D4_CD   | 510 | T | C/T |
| cOR52D3_CD   | 255 | A | A/G |
| cOR4Z4P_Ps   | 462 | G | A/G |
| cOR51B9_CD   | 909 | T | C/T |
| cOR5G7P_Ps   | 275 | G | A/G |
| cOR10A13_CD  | 726 | C | C/T |
| cOR52A9P_Ps  | 815 | G | G/T |
| cOR13S1P_Ps  | 300 | G | G/T |

|             |     |   |     |
|-------------|-----|---|-----|
| cOR9S8P_Ps  | 720 | A | A/T |
| cOR9Q4_CD   | 798 | C | C/T |
| cOR5AN7_CD  | 583 | T | C/T |
| cOR51B7_CD  | 860 | C | C/G |
| cOR1L8_CD   | 895 | A | A/G |
| cOR56A4_CD  | 540 | T | C/T |
| cOR52AB4_CD | 837 | C | C/T |
| cOR2T22_CD  | 129 | T | C/T |
| cOR8V6_CD   | 726 | T | A/T |
| cOR4X3P_Ps  | 547 | C | C/T |
| cOR51B4P_Ps | 738 | A | A/T |
| cOR56B6_CD  | 820 | T | G/T |
| cOR52H8P_Ps | 843 | C | C/G |
| cOR4C18_CD  | 313 | A | A/G |
| cOR11K4_CD  | 406 | A | A/C |
| cOR51I3P_Ps | 448 | G | A/G |
| cOR5H13_CD  | 205 | T | A/T |
| cOR2T36_CD  | 369 | C | C/T |
| cOR10T3_CD  | 691 | G | G/T |
| cOR7C19_CD  | 423 | C | C/T |
| cOR4C42P_Ps | 592 | G | A/G |
| cOR13J2_CD  | 490 | A | A/G |
| cOR2Z3_CD   | 714 | T | C/T |
| cOR4C35_CD  | 214 | A | A/T |
| cOR4C42P_Ps | 72  | C | C/T |
| cOR4C63P_Ps | 328 | G | A/G |
| cOR4C43P_Ps | 41  | A | A/G |
| cOR9S6_CD   | 81  | A | A/G |
| cOR51V2P_Ps | 475 | A | A/G |
| cOR13M2_CD  | 369 | C | C/T |
| cOR4C54_CD  | 897 | A | A/G |
| cOR6C61P_Ps | 97  | G | A/G |
| cOR56A6P_Ps | 234 | A | A/G |
| cOR9A10_CD  | 63  | A | A/T |
| cOR4P6_CD   | 510 | G | A/G |
| cOR52S7P_Ps | 528 | T | C/T |
| cOR6C94P_Ps | 940 | A | A/C |
| cOR5D14_CD  | 814 | C | A/C |
| cOR6C40P_Ps | 689 | G | A/G |
| cOR7C32_CD  | 102 | G | A/G |
| cOR9S25P_Ps | 376 | C | C/T |
| cOR6C42_CD  | 333 | C | C/T |
| cOR7C44_CD  | 541 | A | A/C |
| cOR4C30P_Ps | 778 | G | A/G |
| cOR9A7_CD   | 750 | C | C/T |
| cOR7A22P_Ps | 275 | G | A/G |
| cOR5P4_CD   | 568 | G | G/T |
| cOR4K20_CD  | 723 | C | A/C |

|              |     |   |     |
|--------------|-----|---|-----|
| cOR6C7_CD    | 177 | G | A/G |
| cOR4C35_CD   | 405 | C | C/T |
| cOR2T19P_Ps  | 121 | C | A/C |
| cOR2M8P_Ps   | 851 | T | C/T |
| cOR52B8P_Ps  | 237 | A | A/C |
| cOR2D10P_Ps  | 342 | T | G/T |
| cOR5H12_CD   | 666 | C | C/T |
| cOR52A6_CD   | 170 | C | C/T |
| cOR10Q1_CD   | 273 | A | A/G |
| cOR12J1_CD   | 205 | C | C/T |
| cOR6C90_CD   | 547 | A | A/C |
| cOR13C17P_Ps | 935 | A | A/T |
| cOR52AG1P_Ps | 913 | A | A/T |
| cOR52AG1P_Ps | 844 | G | A/G |
| cOR6C48P_Ps  | 426 | G | A/G |
| cOR4C38P_Ps  | 890 | G | A/G |
| cOR51X3P_Ps  | 532 | G | G/T |
| cOR51X3P_Ps  | 367 | T | G/T |
| cOR4F26P_Ps  | 413 | C | A/C |
| cOR5T7_CD    | 342 | C | C/T |
| cOR5AK7_CD   | 533 | T | C/T |
| cOR9A7_CD    | 847 | C | C/T |
| cOR4H13_CD   | 704 | G | A/G |
| cOR5D14_CD   | 339 | C | C/T |
| cOR4C52_CD   | 293 | G | A/G |
| cOR52A9P_Ps  | 922 | T | C/T |
| cOR9S8P_Ps   | 279 | C | C/T |
| cOR10H17P_Ps | 325 | C | A/C |
| cOR52J5_CD   | 146 | T | C/T |
| cOR4C28P_Ps  | 488 | G | A/G |
| cOR5T5_CD    | 229 | G | A/G |
| cOR8B14_CD   | 929 | T | A/T |
| cOR4X3P_Ps   | 365 | A | A/G |
| cOR2T18_CD   | 831 | A | A/C |
| cOR8V2_CD    | 741 | G | G/T |
| cOR5AN4_CD   | 174 | G | A/G |
| cOR10A10P_Ps | 841 | A | A/G |
| cOR1D10P_Ps  | 809 | C | C/T |
| cOR6C90_CD   | 58  | T | C/T |
| cOR13J2_CD   | 782 | C | C/T |
| cOR4S5_CD    | 629 | T | C/T |
| cOR51F7_CD   | 557 | G | A/G |
| cOR2A37_CD   | 924 | T | G/T |
| cOR51A19_CD  | 252 | C | C/T |
| cOR9K8_CD    | 525 | A | A/G |
| cOR7A27_CD   | 382 | G | G/T |
| cOR9A10_CD   | 369 | T | C/T |
| cOR6W1_CD    | 816 | A | A/G |

|              |     |   |     |
|--------------|-----|---|-----|
| cOR51Z1P_Ps  | 529 | C | A/C |
| cOR13C25_CD  | 763 | C | A/C |
| cOR51B4P_Ps  | 882 | G | C/G |
| cOR4Y2P_Ps   | 649 | A | A/G |
| cOR4A33_CD   | 61  | G | A/G |
| cOR2H10_CD   | 456 | G | A/G |
| cOR5D14_CD   | 890 | G | A/G |
| cOR5D21_CD   | 463 | A | A/G |
| cOR9S5_CD    | 701 | G | A/G |
| cOR1L6_CD    | 118 | G | C/G |
| cOR10J20_CD  | 651 | T | C/T |
| cOR56A13_CD  | 353 | C | C/T |
| cOR7C7_CD    | 824 | C | C/T |
| cOR51A23_CD  | 333 | T | C/T |
| cOR13C28P_Ps | 599 | G | A/G |
| cOR5H13_CD   | 225 | G | C/G |
| cOR6C48P_Ps  | 758 | C | A/C |
| cOR1D10P_Ps  | 857 | A | A/C |
| cOR4C56_CD   | 522 | G | A/G |
| cOR5AL1_CD   | 41  | T | C/T |
| cOR4C54_CD   | 661 | T | C/T |
| cOR1D8_CD    | 716 | A | A/G |
| cOR10K3_CD   | 393 | C | C/T |
| cOR10V6_CD   | 316 | A | A/G |
| cOR13F5_CD   | 439 | G | A/G |
| cOR8J4P_Ps   | 256 | C | C/T |
| cOR6W1_CD    | 453 | T | C/T |
| cOR52X3_CD   | 832 | A | A/G |
| cOR8S13_CD   | 531 | T | C/T |
| cOR5BV1P_Ps  | 596 | T | A/T |
| cOR9S6_CD    | 802 | C | C/G |
| cOR6B7_CD    | 482 | G | A/G |
| cOR4C18_CD   | 660 | C | C/T |
| cOR1K2_CD    | 564 | C | C/T |
| cOR13C12_CD  | 74  | G | A/G |
| cOR4F25_CD   | 235 | C | C/T |
| cOR10A16_CD  | 757 | A | A/G |
| cOR52R3_CD   | 852 | T | G/T |
| cOR4B1_CD    | 174 | T | C/T |
| cOR2Z5P_Ps   | 686 | C | C/G |
| cOR10J7P_Ps  | 398 | G | A/G |
| cOR5L4_CD    | 700 | G | A/G |
| cOR4X5P_Ps   | 570 | T | C/T |
| cOR6D4P_Ps   | 878 | A | A/C |
| cOR4C30P_Ps  | 346 | C | C/G |
| cOR51A14P_Ps | 130 | A | A/G |
| cOR8B14_CD   | 407 | G | A/G |
| cOR6AE1_CD   | 542 | G | A/G |

|              |     |   |     |
|--------------|-----|---|-----|
| cOR13M4_CD   | 515 | C | C/T |
| cOR4C28P_Ps  | 842 | T | C/T |
| cOR4Q4_CD    | 68  | T | A/T |
| cOR51F6_CD   | 555 | C | C/T |
| cOR6B9_CD    | 117 | A | A/G |
| cOR4C41_CD   | 702 | A | A/C |
| cOR8S7_CD    | 613 | T | C/T |
| cOR51I3P_Ps  | 308 | A | A/G |
| cOR11G12_CD  | 131 | A | A/C |
| cOR12F2P_Ps  | 199 | T | C/T |
| cOR9A10_CD   | 282 | G | C/G |
| cOR4C35_CD   | 505 | G | A/G |
| cOR4C63P_Ps  | 103 | G | A/G |
| cOR51F2_CD   | 746 | C | C/T |
| cOR6C25P_Ps  | 894 | G | A/G |
| cOR4Q6P_Ps   | 468 | A | A/G |
| cOR2M9_CD    | 98  | T | C/T |
| cOR10V5_CD   | 685 | G | A/G |
| cOR6C85_CD   | 867 | T | A/T |
| cOR56A6P_Ps  | 951 | A | A/G |
| cOR4A37P_Ps  | 359 | T | C/T |
| cOR1R4_CD    | 417 | G | A/G |
| cOR2H9P_Ps   | 51  | C | A/C |
| cOR10A15P_Ps | 534 | T | C/T |
| cOR7C9P_Ps   | 147 | C | A/C |
| cOR7C22_CD   | 879 | G | A/G |
| cOR52N11P_Ps | 710 | T | C/T |
| cOR6C62_CD   | 118 | A | A/T |
| cOR6C48P_Ps  | 623 | G | A/G |
| cOR10AB2_CD  | 899 | T | G/T |
| cOR4C26P_Ps  | 284 | C | C/T |
| cOR6W1_CD    | 354 | T | C/T |
| cOR9S8P_Ps   | 870 | T | A/T |
| cOR2D4_CD    | 642 | C | A/C |
| cOR5T7_CD    | 405 | G | C/G |
| cOR7C8P_Ps   | 674 | C | C/T |
| cOR4C26P_Ps  | 707 | C | C/T |
| cOR6C28P_Ps  | 395 | C | C/G |
| cOR5G7P_Ps   | 150 | C | C/T |
| cOR10A16_CD  | 118 | G | G/T |
| cOR4A33_CD   | 216 | C | C/T |
| cOR4Y2P_Ps   | 716 | A | A/G |
| cOR52U3_CD   | 887 | T | A/T |
| cOR4C28P_Ps  | 317 | G | C/G |
| cOR7C19_CD   | 681 | T | G/T |
| cOR52H8P_Ps  | 807 | C | C/T |
| cOR8S14_CD   | 887 | A | A/C |
| cOR1D10P_Ps  | 929 | C | C/T |

|              |     |   |     |
|--------------|-----|---|-----|
| cOR7C30_CD   | 729 | T | C/T |
| cOR2M8P_Ps   | 518 | T | G/T |
| cOR52A19_CD  | 352 | C | C/T |
| cOR7C44_CD   | 222 | T | A/T |
| cOR51B11P_Ps | 259 | C | C/T |
| cOR4C52_CD   | 656 | T | C/T |
| cOR10AA2_CD  | 136 | A | A/G |
| cOR4Z1P_Ps   | 174 | A | A/G |
| cOR10Z2_CD   | 318 | G | A/G |
| cOR6C86P_Ps  | 844 | G | A/G |
| cOR6C53P_Ps  | 124 | A | A/C |
| cOR4C29_CD   | 615 | T | C/T |
| cOR13D1_CD   | 137 | G | G/T |
| cOR4S4_CD    | 744 | C | C/T |
| cOR4F34_CD   | 828 | A | A/C |
| cOR8D5_CD    | 588 | G | A/G |
| cOR8S12_CD   | 153 | T | C/T |
| cOR7C35_CD   | 132 | C | C/T |
| cOR8J5_CD    | 519 | C | C/T |
| cOR6C63_CD   | 728 | T | C/T |
| cOR11G12_CD  | 79  | G | A/G |
| cOR4P5_CD    | 849 | A | A/G |
| cOR2B10P_Ps  | 730 | C | A/C |
| cOR52S3P_Ps  | 528 | C | C/T |
| cOR12E7_CD   | 174 | A | A/G |
| cOR1A01P_Ps  | 849 | A | A/T |
| cOR7C22_CD   | 315 | A | A/C |
| cOR1D10P_Ps  | 650 | C | C/T |
| cOR4K22_CD   | 267 | T | G/T |
| cOR7C55_CD   | 766 | C | C/T |
| cOR56A20_CD  | 849 | T | C/T |
| cOR56B5_CD   | 825 | C | C/T |
| cOR13L2_CD   | 919 | T | C/T |
| cOR4X3P_Ps   | 676 | C | C/T |
| cOR4T2P_Ps   | 638 | T | C/T |
| cOR5L7P_Ps   | 868 | C | C/T |
| cOR2T14_CD   | 378 | C | C/T |
| cOR10A11_CD  | 678 | C | C/T |
| cOR52L4_CD   | 720 | G | A/G |
| cOR52R3_CD   | 804 | C | C/T |
| cOR4C58_CD   | 446 | C | C/T |
| cOR9S8P_Ps   | 993 | G | C/G |
| cOR5AC3_CD   | 114 | T | C/T |
| cOR4H13_CD   | 460 | G | A/G |
| cOR56A13_CD  | 895 | A | A/C |
| cOR5K6P_Ps   | 367 | G | C/G |
| cOR5J4_CD    | 508 | G | A/G |
| cOR4Q6P_Ps   | 489 | T | C/T |

|             |     |   |     |
|-------------|-----|---|-----|
| cOR6A2_CD   | 798 | G | A/G |
| cOR2D7_CD   | 609 | C | C/T |
| cOR7C22_CD  | 943 | T | A/T |
| cOR52D4_CD  | 561 | T | C/T |
| cOR10A8P_Ps | 873 | T | C/T |
| cOR7C41P_Ps | 775 | G | A/G |
| cOR51AA2_CD | 119 | T | G/T |
| cOR8U2_CD   | 300 | A | A/G |
| cOR5AN5P_Ps | 892 | C | C/T |
| cOR10A11_CD | 198 | A | A/C |
| cOR5H16_CD  | 395 | T | A/T |
| cOR4C53_CD  | 861 | A | A/G |
| cOR1L10P_Ps | 295 | G | C/G |
| cOR6C7_CD   | 934 | C | C/G |
| cOR6D5_CD   | 816 | A | A/T |
| cOR5L7P_Ps  | 150 | T | C/T |
| cOR10T4_CD  | 372 | C | C/T |
| cOR8J4P_Ps  | 847 | C | C/T |
| cOR51E2_CD  | 123 | A | A/C |
| cOR13C25_CD | 260 | G | C/G |
| cOR2T36_CD  | 333 | A | A/G |
| cOR6Z1_CD   | 515 | A | A/G |
| cOR10A8P_Ps | 295 | A | A/T |
| cOR7C8P_Ps  | 834 | G | C/G |
| cOR7C8P_Ps  | 902 | C | C/T |
| cOR9K9P_Ps  | 329 | G | A/G |
| cOR6C35_CD  | 342 | C | C/T |
| cOR6D5_CD   | 637 | G | A/G |
| cOR2H9P_Ps  | 938 | T | C/T |
| cOR5M23_CD  | 147 | T | C/T |
| cOR6D5_CD   | 282 | G | A/G |
| cOR7C6_CD   | 400 | G | A/G |
| cOR9S12P_Ps | 279 | A | A/G |
| cOR5D14_CD  | 521 | C | C/T |
| cOR6D5_CD   | 316 | A | A/G |
| cOR6C53P_Ps | 77  | T | A/T |
| cOR51H4_CD  | 475 | C | C/T |
| cOR10J10_CD | 315 | C | C/G |
| cOR4C41_CD  | 534 | C | C/T |
| cOR6C22P_Ps | 54  | A | A/G |
| cOR4C53_CD  | 702 | C | C/T |
| cOR2M11_CD  | 659 | C | C/T |
| cOR2H9P_Ps  | 766 | C | C/T |
| cOR52R3_CD  | 822 | C | A/C |
| cOR4P12P_Ps | 505 | C | C/T |
| cOR5G7P_Ps  | 161 | C | A/C |
| cOR2T20_CD  | 222 | C | C/T |
| cOR8V2_CD   | 918 | T | C/T |

|             |      |   |     |
|-------------|------|---|-----|
| cOR9K9P_Ps  | 403  | C | C/T |
| cOR52S7P_Ps | 171  | C | C/T |
| cOR2F3_CD   | 360  | G | C/G |
| cOR2T18_CD  | 390  | T | A/T |
| cOR9S16_CD  | 276  | G | C/G |
| cOR6N4_CD   | 429  | G | A/G |
| cOR56A11_CD | 816  | C | C/T |
| cOR10A16_CD | 349  | A | A/G |
| cOR5T7_CD   | 738  | G | A/G |
| cOR2T19P_Ps | 265  | A | A/G |
| cOR2AT5P_Ps | 590  | C | C/T |
| cOR8D6_CD   | 163  | T | C/T |
| cOR2F4P_Ps  | 664  | T | C/T |
| cOR7C17_CD  | 145  | A | A/T |
| cOR10A16_CD | 942  | T | A/T |
| cOR2T18_CD  | 943  | G | G/T |
| cOR52N10_CD | 604  | C | C/T |
| cOR5L6_CD   | 272  | C | C/T |
| cOR6AE1_CD  | 644  | A | A/G |
| cOR2T23_CD  | 291  | T | C/T |
| cOR10J20_CD | 381  | T | C/T |
| cOR6F2_CD   | 162  | G | A/G |
| cOR5B31_CD  | 917  | C | C/T |
| cOR13C25_CD | 617  | G | G/T |
| cOR11H7_CD  | 632  | A | A/C |
| cOR52A9P_Ps | 951  | C | C/T |
| cOR6K7_CD   | 272  | A | A/G |
| cOR6C20P_Ps | 212  | A | A/G |
| cOR4E1_CD   | 243  | T | A/T |
| cOR1AE1_CD  | 700  | G | A/G |
| cOR10Q3_CD  | 474  | A | A/G |
| cOR7C9P_Ps  | 1122 | C | C/T |
| cOR6B8_CD   | 225  | G | C/G |
| cOR8V6_CD   | 686  | A | A/G |
| cOR10Q1_CD  | 450  | A | A/G |
| cOR10D1_CD  | 746  | C | C/T |
| cOR5AN7_CD  | 598  | C | A/C |
| cOR6D5_CD   | 261  | C | C/T |
| cOR52A6_CD  | 651  | T | C/T |
| cOR2AD2_CD  | 378  | C | C/T |
| cOR51B4P_Ps | 453  | G | A/G |
| cOR8V2_CD   | 122  | T | C/T |
| cOR5D14_CD  | 149  | T | C/T |
| cOR4Y5_CD   | 235  | T | C/T |
| cOR1L8_CD   | 413  | G | A/G |
| cOR52A9P_Ps | 1074 | G | A/G |
| cOR5B34_CD  | 359  | G | A/G |
| cOR7C5P_Ps  | 257  | T | C/T |



|              |      |   |     |
|--------------|------|---|-----|
| cOR8V2_CD    | 99   | C | C/T |
| cOR6K5_CD    | 193  | G | A/G |
| cOR10A16_CD  | 1044 | G | A/G |
| cOR6C25P_Ps  | 225  | G | A/G |
| cOR13C17P_Ps | 87   | G | A/G |
| cOR13A2_CD   | 456  | G | A/G |
| cOR51B8_CD   | 405  | C | C/T |
| cOR5M19_CD   | 480  | A | A/T |
| cOR7C32_CD   | 819  | A | A/G |
| cOR7C6_CD    | 371  | T | A/T |
| cOR10V4_CD   | 564  | G | A/G |
| cOR5P4_CD    | 459  | C | C/T |
| cOR51A24_CD  | 885  | T | C/T |
| cOR51A14P_Ps | 668  | A | A/T |
| cOR56B6_CD   | 456  | G | A/G |
| cOR6C32P_Ps  | 819  | G | C/G |
| cOR51B7_CD   | 168  | T | C/T |
| cOR6K5_CD    | 150  | G | G/T |
| cOR5M16_CD   | 787  | C | A/C |
| cOR10A15P_Ps | 805  | T | A/T |
| cOR4F25_CD   | 408  | T | G/T |
| cOR52N11P_Ps | 557  | G | A/G |
| cOR4Z5_CD    | 395  | T | G/T |
| cOR5G7P_Ps   | 79   | A | A/T |
| cOR5AN7_CD   | 769  | A | A/G |
| cOR6C83_CD   | 81   | G | A/G |
| cOR6C25P_Ps  | 477  | A | A/G |
| cOR2M10P_Ps  | 43   | G | G/T |
| cOR8U7_CD    | 711  | T | C/T |
| cOR4C52_CD   | 156  | A | A/G |
| cOR51V2P_Ps  | 535  | T | C/T |
| cOR1D11_CD   | 180  | C | C/T |
| cOR51B10_CD  | 459  | C | C/T |
| cOR51Z1P_Ps  | 731  | T | C/T |
| cOR7C37_CD   | 494  | G | A/G |
| cOR51H4_CD   | 70   | G | A/G |
| cOR10J10_CD  | 64   | C | C/T |
| cOR7C42P_Ps  | 436  | C | C/T |
| cOR52B2P_Ps  | 171  | C | C/T |
| cOR7C6_CD    | 61   | C | C/G |
| cOR51F2_CD   | 303  | C | C/T |
| cOR4G10_CD   | 273  | T | C/T |
| cOR56A6P_Ps  | 1037 | G | A/G |
| cOR51Q2P_Ps  | 385  | T | A/T |
| cOR5M12_CD   | 808  | G | A/G |
| cOR6D5_CD    | 746  | A | A/T |
| cOR2D4_CD    | 398  | C | C/T |
| cOR6D5_CD    | 249  | A | A/G |

|              |      |   |     |
|--------------|------|---|-----|
| cOR2K2_CD    | 408  | A | A/G |
| cOR4V4_CD    | 586  | A | A/C |
| cOR51H5_CD   | 515  | G | A/G |
| cOR13C22_CD  | 840  | T | C/T |
| cOR1D10P_Ps  | 519  | G | A/G |
| cOR10J20_CD  | 399  | A | A/G |
| cOR1L6_CD    | 162  | G | A/G |
| cOR13G1_CD   | 932  | G | A/G |
| cOR7C9P_Ps   | 514  | T | C/T |
| cOR10AD4P_Ps | 761  | T | C/T |
| cOR8B22P_Ps  | 472  | G | A/G |
| cOR9A10_CD   | 396  | C | C/T |
| cOR52S7P_Ps  | 339  | G | A/G |
| cOR51A23_CD  | 27   | C | C/T |
| cOR5BC2P_Ps  | 645  | T | C/T |
| cOR4C35_CD   | 783  | C | C/T |
| cOR4C57_CD   | 647  | A | A/G |
| cOR10V5_CD   | 705  | A | A/G |
| cOR52U5_CD   | 887  | T | C/T |
| cOR4P11_CD   | 645  | C | C/T |
| cOR5AN5P_Ps  | 373  | T | A/G |
| cOR5B31_CD   | 883  | G | A/G |
| cOR56A6P_Ps  | 1050 | C | C/T |
| cOR56A4_CD   | 135  | T | C/T |
| cOR4X3P_Ps   | 615  | G | A/G |
| cOR13P2_CD   | 686  | A | A/G |
| cOR6C42_CD   | 171  | T | G/T |
| cOR4C64P_Ps  | 10   | G | A/G |
| cOR8B3_CD    | 541  | A | A/G |
| cOR6D4P_Ps   | 401  | C | C/T |
| cOR10AJ2P_Ps | 397  | C | C/T |
| cOR4Y1_CD    | 787  | T | C/T |
| cOR10AA2_CD  | 600  | G | A/G |
| cOR2K2_CD    | 369  | C | C/T |
| cOR9G8_CD    | 138  | T | G/T |
| cOR52A13P_Ps | 548  | G | A/G |
| cOR52E2_CD   | 45   | G | G/T |
| cOR51A22_CD  | 940  | A | A/C |
| cOR56A13_CD  | 660  | T | C/T |
| cOR4C26P_Ps  | 894  | A | A/T |
| cOR6C7_CD    | 60   | A | A/G |
| cOR4V2P_Ps   | 418  | T | C/T |
| cOR55B4P_Ps  | 357  | C | A/C |
| cOR9S16_CD   | 719  | G | A/G |
| cOR52W2_CD   | 509  | G | A/G |
| cOR11S2_CD   | 652  | T | A/T |
| cOR52R3_CD   | 465  | G | A/G |
| cOR7C6_CD    | 426  | G | A/G |

|             |     |   |     |
|-------------|-----|---|-----|
| cOR6C11_CD  | 321 | C | C/G |
| cOR5H9_CD   | 420 | C | C/G |
| cOR52R3_CD  | 707 | A | A/G |
| cOR6C25P_Ps | 556 | A | A/T |
| cOR1D11_CD  | 667 | A | A/C |
| cOR6C85_CD  | 637 | G | A/G |
| cOR52U4_CD  | 952 | G | A/G |
| cOR6K5_CD   | 284 | C | C/T |
| cOR1S3P_Ps  | 213 | T | C/T |
| cOR2A7P_Ps  | 399 | T | C/T |
| cOR5M23_CD  | 429 | C | C/T |
| cOR2B10P_Ps | 667 | T | C/T |
| cOR4C52_CD  | 453 | T | A/T |
| cOR51A19_CD | 382 | G | C/G |
| cOR5G1_CD   | 44  | C | C/T |
| cOR51B4P_Ps | 641 | A | A/C |
| cOR51B9_CD  | 533 | C | C/T |
| cOR52AB4_CD | 158 | T | C/T |
| cOR56B9P_Ps | 350 | G | G/T |
| cOR2W9_CD   | 526 | C | C/G |
| cOR4X5P_Ps  | 503 | C | C/T |
| cOR4C56_CD  | 309 | C | C/T |
| cOR4C23P_Ps | 262 | T | C/T |
| cOR4C3_CD   | 721 | A | A/G |
| cOR4Y1_CD   | 764 | C | A/C |
| cOR4C65P_Ps | 255 | T | C/T |
| cOR52H8P_Ps | 795 | T | C/T |
| cOR10AB2_CD | 750 | C | C/T |
| cOR10Q3_CD  | 622 | G | A/G |
| cOR5T6_CD   | 504 | A | A/T |
| cOR4C53_CD  | 888 | G | A/G |
| cOR52AC1_CD | 146 | T | A/T |
| cOR2AT5P_Ps | 450 | T | A/T |
| cOR9S6_CD   | 442 | C | C/T |
| cOR11J4P_Ps | 716 | T | C/T |
| cOR56B5_CD  | 90  | G | A/G |
| cOR5H13_CD  | 969 | G | G/T |
| cOR2G5_CD   | 398 | C | C/T |
| cOR4C32P_Ps | 924 | G | A/G |
| cOR13R1_CD  | 398 | T | C/T |
| cOR52AB2_CD | 379 | A | A/G |
| cOR1D10P_Ps | 836 | C | C/T |
| cOR51Z1P_Ps | 783 | T | C/T |
| cOR4C52_CD  | 231 | C | C/T |
| cOR1J6P_Ps  | 150 | A | A/G |
| cOR13C25_CD | 457 | C | C/T |
| cOR10J7P_Ps | 748 | C | C/T |
| cOR52A9P_Ps | 708 | G | A/G |

|              |      |   |     |
|--------------|------|---|-----|
| cOR10AJ2P_Ps | 437  | A | A/G |
| cOR51Z1P_Ps  | 842  | A | A/G |
| cOR6C19P_Ps  | 111  | G | A/G |
| cOR55B4P_Ps  | 990  | A | A/T |
| cOR4C52_CD   | 695  | G | A/G |
| cOR52E24_CD  | 123  | T | C/T |
| cOR6C14P_Ps  | 353  | G | A/G |
| cOR4C52_CD   | 622  | A | A/G |
| cOR10A11_CD  | 72   | A | A/G |
| cOR8B14_CD   | 967  | A | A/G |
| cOR13P2_CD   | 550  | A | A/G |
| cOR2T22_CD   | 674  | G | A/G |
| cOR2A7P_Ps   | 29   | G | A/G |
| cOR7C17_CD   | 79   | G | A/G |
| cOR10J19_CD  | 825  | T | C/T |
| cOR10H6_CD   | 387  | T | C/T |
| cOR52S3P_Ps  | 844  | T | G/T |
| cOR4Q4_CD    | 714  | G | G/T |
| cOR11G7_CD   | 187  | T | C/T |
| cOR9A10_CD   | 685  | T | C/T |
| cOR10H17P_Ps | 866  | C | C/T |
| cOR51A23_CD  | 440  | T | G/T |
| cOR4C35_CD   | 120  | G | A/G |
| cOR2AT5P_Ps  | 251  | C | A/C |
| cOR51K2_CD   | 592  | C | C/T |
| cOR10R5_CD   | 416  | A | A/C |
| cOR51G2_CD   | 555  | C | C/T |
| cOR6C97P_Ps  | 658  | A | A/G |
| cOR8H4_CD    | 486  | A | A/C |
| cOR2D8_CD    | 439  | C | C/T |
| cOR4P12P_Ps  | 876  | T | C/T |
| cOR1A3_CD    | 621  | T | C/T |
| cOR1J6P_Ps   | 493  | C | C/T |
| cOR10J20_CD  | 54   | G | A/G |
| cOR51Z1P_Ps  | 490  | A | A/G |
| cOR7C9P_Ps   | 1181 | T | C/T |
| cOR10R4_CD   | 442  | A | A/G |
| cOR2H9P_Ps   | 205  | T | C/T |
| cOR13C9_CD   | 239  | C | A/C |
| cOR4C26P_Ps  | 877  | G | G/T |
| cOR51X1P_Ps  | 736  | G | G/T |
| cOR13C25_CD  | 489  | A | A/G |
| cOR1D8_CD    | 855  | T | C/T |
| cOR6C56P_Ps  | 321  | C | C/T |
| cOR8J4P_Ps   | 800  | A | A/G |
| cOR4C41_CD   | 282  | C | C/G |
| cOR7C8P_Ps   | 688  | C | A/C |
| cOR10T4_CD   | 726  | C | C/T |

|              |     |   |     |
|--------------|-----|---|-----|
| cOR51A22_CD  | 678 | C | C/T |
| cOR56B12_CD  | 708 | G | A/G |
| cOR56A4_CD   | 684 | G | G/T |
| cOR52R3_CD   | 63  | C | A/C |
| cOR4X5P_Ps   | 403 | T | C/T |
| cOR4X3P_Ps   | 403 | A | A/G |
| cOR10Q5_CD   | 606 | C | G/T |
| cOR52H8P_Ps  | 519 | T | A/T |
| cOR2H9P_Ps   | 779 | T | C/T |
| cOR7C9P_Ps   | 986 | C | C/T |
| cOR4C62P_Ps  | 564 | A | A/G |
| cOR6AB1P_Ps  | 889 | A | A/G |
| cOR4K27_CD   | 792 | A | A/G |
| cOR5T6_CD    | 430 | G | A/G |
| cOR1D11_CD   | 12  | A | A/T |
| cOR4L4_CD    | 26  | G | A/G |
| cOR10J24P_Ps | 701 | A | A/C |
| cOR51X1P_Ps  | 806 | A | A/C |
| cOR5K6P_Ps   | 451 | G | A/G |
| cOR7C30_CD   | 589 | A | A/T |
| cOR6M4P_Ps   | 845 | A | A/G |
| cOR5AN7_CD   | 516 | T | G/T |
| cOR4P7_CD    | 637 | C | C/T |
| cOR6C43_CD   | 409 | C | C/T |
| cOR4C26P_Ps  | 589 | C | C/T |
| cOR6M6_CD    | 690 | C | C/T |
| cOR4F25_CD   | 573 | T | A/T |
| cOR7C42P_Ps  | 263 | G | A/G |
| cOR4X6_CD    | 794 | C | C/T |
| cOR4X3P_Ps   | 826 | C | C/T |
| cOR6C83_CD   | 70  | T | A/T |
| cOR8D5_CD    | 255 | C | C/T |
| cOR2H9P_Ps   | 385 | A | A/G |
| cOR56B9P_Ps  | 545 | C | C/T |
| cOR5B31_CD   | 732 | T | C/T |
| cOR4C62P_Ps  | 898 | G | A/G |
| cOR2T36_CD   | 142 | G | C/G |
| cOR6C63_CD   | 690 | A | A/C |
| cOR11G6P_Ps  | 653 | T | C/T |
| cOR51B11P_Ps | 96  | C | C/T |
| cOR5D20_CD   | 259 | T | C/T |
| cOR52A9P_Ps  | 933 | C | C/T |
| cOR8U7_CD    | 387 | C | C/T |
| cOR52AE1_CD  | 637 | C | C/G |
| cOR7A23_CD   | 100 | C | A/C |
| cOR12J1_CD   | 21  | G | G/T |
| cOR3A12_CD   | 180 | A | A/T |
| cOR10A3_CD   | 767 | G | A/G |

|             |      |   |     |
|-------------|------|---|-----|
| cOR1A4_CD   | 460  | G | A/G |
| cOR5BU2_CD  | 163  | C | C/T |
| cOR52R3_CD  | 390  | C | C/T |
| cOR2T37_CD  | 768  | C | C/T |
| cOR10AD2_CD | 120  | A | A/G |
| cOR52A9P_Ps | 744  | T | C/T |
| cOR52E24_CD | 791  | G | A/G |
| cOR4Y2P_Ps  | 755  | T | C/T |
| cOR5H12_CD  | 513  | T | C/T |
| cOR7C9P_Ps  | 1041 | G | G/T |
| cOR5K7_CD   | 801  | A | A/G |
| cOR5K7_CD   | 76   | A | A/G |
| cOR10Q5_CD  | 381  | T | C/T |
| cOR51Z1P_Ps | 894  | T | C/T |
| cOR12E7_CD  | 153  | T | A/T |
| cOR2T21_CD  | 157  | A | A/G |
| cOR52X3_CD  | 75   | G | C/G |
| cOR4X3P_Ps  | 661  | T | A/T |
| cOR4A27P_Ps | 592  | G | A/G |
| cOR52A9P_Ps | 907  | G | A/G |
| cOR7C44_CD  | 247  | G | A/G |
| cOR2A37_CD  | 846  | C | C/T |
| cOR6M7_CD   | 297  | G | A/G |
| cOR52A9P_Ps | 563  | T | C/T |
| cOR4X3P_Ps  | 889  | C | A/C |
| cOR5D23_CD  | 273  | G | C/G |
| cOR4X5P_Ps  | 219  | C | C/T |
| cOR6D6_CD   | 560  | G | G/T |
| cOR13C22_CD | 190  | T | C/T |
| cOR2A37_CD  | 866  | T | C/T |
| cOR56A13_CD | 76   | G | A/G |
| cOR10H20_CD | 285  | G | A/G |
| cOR4Y4_CD   | 775  | T | C/T |
| cOR5H13_CD  | 351  | G | A/G |
| cOR8D5_CD   | 349  | G | A/G |
| cOR10J7P_Ps | 181  | T | C/T |
| cOR10A16_CD | 286  | A | A/G |
| cOR4C42P_Ps | 172  | A | A/G |
| cOR4Y2P_Ps  | 743  | T | C/T |
| cOR5T6_CD   | 648  | T | C/T |
| cOR52U2_CD  | 444  | C | C/T |
| cOR9R6_CD   | 374  | G | A/G |
| cOR52H7_CD  | 677  | G | A/G |
| cOR1L8_CD   | 585  | T | C/T |
| cOR5AL3_CD  | 710  | C | C/G |
| cOR52R3_CD  | 421  | A | A/G |
| cOR51A21_CD | 715  | C | A/C |
| cOR10B1P_Ps | 286  | C | C/T |

|              |      |   |     |
|--------------|------|---|-----|
| cOR51Z1P_Ps  | 797  | G | G/T |
| cOR5H13_CD   | 288  | G | A/G |
| cOR7C7_CD    | 429  | C | C/T |
| cOR4P11_CD   | 422  | G | C/G |
| cOR13C13_CD  | 482  | G | C/G |
| cOR6K10_CD   | 573  | A | A/C |
| cOR4K21P_Ps  | 408  | G | A/G |
| cOR9S6_CD    | 498  | C | A/C |
| cOR9Q4_CD    | 693  | T | C/G |
| cOR51Q2P_Ps  | 569  | G | G/T |
| cOR6C14P_Ps  | 776  | A | A/T |
| cOR2D7_CD    | 846  | T | A/T |
| cOR5AK8_CD   | 267  | A | A/G |
| cOR52B10_CD  | 36   | A | A/G |
| cOR52H10P_Ps | 177  | C | C/T |
| cOR6M6_CD    | 907  | A | A/T |
| cOR12E5_CD   | 247  | C | A/C |
| cOR51X1P_Ps  | 292  | G | A/G |
| cOR12E5_CD   | 217  | G | A/G |
| cOR9S3P_Ps   | 610  | T | C/T |
| cOR10R4_CD   | 457  | A | A/G |
| cOR6C35_CD   | 220  | G | G/T |
| cOR52S7P_Ps  | 267  | A | A/T |
| cOR5K6P_Ps   | 769  | T | A/T |
| cOR5P6_CD    | 904  | G | A/G |
| cOR2D4_CD    | 481  | T | A/T |
| cOR6C28P_Ps  | 348  | T | G/T |
| cOR6K10_CD   | 391  | C | C/T |
| cOR4A34_CD   | 964  | A | C/T |
| cOR4F30P_Ps  | 535  | G | A/G |
| cOR7C17_CD   | 719  | C | A/C |
| cOR8S11P_Ps  | 217  | C | C/T |
| cOR13C25_CD  | 312  | C | A/C |
| cOR10J24P_Ps | 231  | T | C/T |
| cOR1L8_CD    | 129  | C | C/T |
| cOR4C65P_Ps  | 279  | T | G/T |
| cOR4A33_CD   | 43   | C | C/T |
| cOR7C6_CD    | 711  | A | A/G |
| cOR7C9P_Ps   | 1000 | C | C/G |
| cOR51Z1P_Ps  | 858  | G | A/G |
| cOR4Q4_CD    | 511  | C | C/T |
| cOR2D7_CD    | 864  | T | A/C |
| cOR2T14_CD   | 411  | T | G/T |
| cOR11K4_CD   | 96   | A | A/G |
| cOR1AE1_CD   | 61   | C | C/G |
| cOR9S3P_Ps   | 391  | C | C/T |
| cOR4C26P_Ps  | 862  | C | C/T |
| cOR9K10_CD   | 636  | C | C/T |

|             |     |   |     |
|-------------|-----|---|-----|
| cOR3A10_CD  | 241 | G | A/G |
| cOR4X5P_Ps  | 115 | G | A/G |
| cOR9K9P_Ps  | 560 | A | A/G |
| cOR2H9P_Ps  | 604 | C | C/G |
| cOR5K5_CD   | 264 | G | A/G |
| cOR4C30P_Ps | 280 | T | G/T |
| cOR9S6_CD   | 741 | C | C/T |
| cOR9K9P_Ps  | 452 | C | C/T |
| cOR51L4P_Ps | 654 | G | G/T |
| cOR52J5_CD  | 106 | A | A/G |
| cOR7C22_CD  | 166 | C | C/T |
| cOR6M7_CD   | 444 | G | C/G |
| cOR52R3_CD  | 656 | C | C/G |
| cOR13M4_CD  | 312 | A | A/G |
| cOR10H6_CD  | 205 | A | A/G |
| cOR1L10P_Ps | 827 | G | A/G |
| cOR51H3_CD  | 219 | T | C/T |
| cOR4C54_CD  | 359 | G | A/G |
| cOR3A12_CD  | 294 | G | A/G |
| cOR8B3_CD   | 342 | G | A/G |
| cOR56B13_CD | 637 | G | G/T |
| cOR7C42P_Ps | 97  | C | C/T |
| cOR5K5_CD   | 436 | A | A/G |
| cOR13C22_CD | 440 | C | C/T |
| cOR6C23P_Ps | 417 | T | C/T |
| cOR10AA2_CD | 774 | C | C/T |
| cOR4A32P_Ps | 100 | A | A/C |
| cOR6C28P_Ps | 258 | C | C/T |
| cOR13P1_CD  | 919 | C | C/T |
| cOR6D5_CD   | 620 | A | A/G |
| cOR13C13_CD | 165 | A | A/G |
| cOR5H13_CD  | 261 | T | C/T |
| cOR2B10P_Ps | 309 | C | C/T |
| cOR10V5_CD  | 920 | G | A/G |
| cOR56B13_CD | 141 | C | C/T |
| cOR1AO1P_Ps | 407 | G | A/G |
| cOR6C24P_Ps | 342 | C | C/T |
| cOR5AN5P_Ps | 223 | A | A/G |
| cOR10K3_CD  | 618 | A | A/G |
| cOR4Y1_CD   | 840 | C | C/G |
| cOR4Z3_CD   | 753 | C | C/T |
| cOR4A33_CD  | 671 | A | A/G |
| cOR4C44P_Ps | 270 | A | A/C |
| cOR2D10P_Ps | 633 | A | A/C |
| cOR4C52_CD  | 354 | T | A/T |
| cOR52R3_CD  | 126 | T | A/T |
| cOR10T3_CD  | 360 | C | C/T |
| cOR7C22_CD  | 255 | C | C/T |



|              |      |   |     |
|--------------|------|---|-----|
| cOR9S14_CD   | 126  | C | A/C |
| cOR6C86P_Ps  | 761  | C | C/T |
| cOR7C9P_Ps   | 1153 | T | C/T |
| cOR13R2_CD   | 218  | G | A/G |
| cOR56B9P_Ps  | 576  | G | C/G |
| cOR10V4_CD   | 399  | C | C/T |
| cOR10J10_CD  | 292  | A | A/C |
| cOR10R6P_Ps  | 187  | G | A/G |
| cOR6Z1_CD    | 315  | A | A/C |
| cOR52A13P_Ps | 416  | G | A/G |
| cOR4F22P_Ps  | 222  | A | A/G |
| cOR2H9P_Ps   | 866  | T | C/T |
| cOR2H9P_Ps   | 401  | A | A/T |
| cOR4C29_CD   | 571  | T | C/T |
| cOR9S6_CD    | 69   | A | A/G |
| cOR52AB5P_Ps | 766  | G | A/G |
| cOR9K9P_Ps   | 1142 | A | A/C |
| cOR13S1P_Ps  | 431  | G | A/G |
| cOR7C22_CD   | 865  | A | A/T |
| cOR1D10P_Ps  | 455  | G | A/G |
| cOR6F2_CD    | 471  | G | A/G |
| cOR5D23_CD   | 318  | C | C/T |
| cOR13P1_CD   | 892  | C | C/T |
| cOR6C22P_Ps  | 937  | C | A/C |
| cOR51X3P_Ps  | 271  | T | C/T |
| cOR10J24P_Ps | 195  | G | A/G |
| cOR8V6_CD    | 660  | C | C/G |
| cOR6C35_CD   | 277  | A | A/C |
| cOR6C42_CD   | 615  | T | G/T |
| cOR51B9_CD   | 561  | T | A/T |
| cOR51X1P_Ps  | 72   | A | A/C |
| cOR8B21_CD   | 842  | T | C/T |
| cOR5B31_CD   | 861  | C | A/C |
| cOR8J6_CD    | 83   | T | A/T |
| cOR6C41P_Ps  | 583  | C | C/T |
| cOR1E11_CD   | 540  | T | G/T |
| cOR6C7_CD    | 144  | C | A/C |
| cOR9S8P_Ps   | 298  | G | A/G |
| cOR52N11P_Ps | 458  | C | C/T |
| cOR5H9_CD    | 183  | G | A/G |
| cOR2F3_CD    | 402  | C | C/T |
| cOR52AC1_CD  | 99   | T | A/T |
| cOR12F2P_Ps  | 80   | A | A/G |
| cOR9S3P_Ps   | 652  | T | C/T |
| cOR52R2P_Ps  | 810  | T | C/T |
| cOR10AA2_CD  | 840  | G | C/G |
| cOR9I2_CD    | 263  | C | C/T |
| cOR56A13_CD  | 437  | C | C/T |

|              |     |   |     |
|--------------|-----|---|-----|
| cOR10J24P_Ps | 717 | A | A/G |
| cOR4C42P_Ps  | 316 | C | C/G |
| cOR6B6_CD    | 315 | C | C/T |
| cOR8V4_CD    | 484 | A | A/G |
| cOR13P1_CD   | 657 | A | A/G |
| cOR5K5_CD    | 76  | A | A/G |
| cOR6C8P_Ps   | 420 | A | A/G |
| cOR52N10_CD  | 801 | G | A/G |
| cOR11H10_CD  | 868 | A | A/G |
| cOR5D21_CD   | 837 | C | C/T |
| cOR6C62_CD   | 638 | T | C/T |
| cOR10J24P_Ps | 70  | T | C/T |
| cOR6AE1_CD   | 581 | C | C/T |
| cOR8B20_CD   | 534 | T | C/T |
| cOR9K9P_Ps   | 748 | G | A/G |
| cOR52A9P_Ps  | 990 | C | C/T |
| cOR7C22_CD   | 672 | C | C/T |
| cOR51F7_CD   | 735 | C | C/T |
| cOR56A6P_Ps  | 246 | G | C/G |
| cOR13C17P_Ps | 949 | T | A/T |
| cOR5T6_CD    | 393 | T | C/T |
| cOR6C46P_Ps  | 302 | G | G/T |
| cOR5H13_CD   | 369 | A | A/G |
| cOR6D5_CD    | 729 | A | A/T |
| cOR10R4_CD   | 420 | A | A/C |
| cOR4C62P_Ps  | 364 | A | A/G |
| cOR5D23_CD   | 296 | A | A/T |
| cOR6K10_CD   | 977 | T | A/T |
| cOR12E7_CD   | 276 | T | C/T |
| cOR4Y1_CD    | 328 | G | A/G |
| cOR4B1_CD    | 358 | T | C/T |
| cOR2D10P_Ps  | 745 | T | A/T |
| cOR56B10_CD  | 432 | T | C/T |
| cOR51V2P_Ps  | 156 | T | C/T |
| cOR2T21_CD   | 381 | G | A/G |
| cOR52A9P_Ps  | 586 | A | A/G |
| cOR9S8P_Ps   | 30  | C | C/T |
| cOR8T5P_Ps   | 529 | A | A/C |
| cOR4C52_CD   | 518 | T | G/T |
| cOR4C32P_Ps  | 889 | G | A/G |
| cOR4C42P_Ps  | 459 | C | C/T |
| cOR12E8_CD   | 696 | T | A/T |
| cOR52X3_CD   | 300 | A | A/G |
| cOR4L4_CD    | 289 | G | A/G |
| cOR51J3_CD   | 301 | C | A/C |
| cOR12F2P_Ps  | 756 | C | C/T |
| cOR13M5P_Ps  | 225 | A | A/G |
| cOR52H5_CD   | 834 | C | C/T |

|              |     |   |     |
|--------------|-----|---|-----|
| cOR1A4_CD    | 692 | A | A/G |
| cOR52H8P_Ps  | 710 | G | A/G |
| cOR1J6P_Ps   | 284 | C | C/T |
| cOR5H13_CD   | 582 | C | C/T |
| cOR9S8P_Ps   | 405 | A | A/G |
| cOR6B6_CD    | 191 | G | A/G |
| cOR4C35_CD   | 753 | T | C/T |
| cOR13D1_CD   | 363 | C | C/T |
| cOR4Q4_CD    | 951 | T | G/T |
| cOR5M16_CD   | 837 | T | C/T |
| cOR10T3_CD   | 723 | T | C/T |
| cOR13C12_CD  | 198 | T | C/T |
| cOR10C2_CD   | 759 | G | A/G |
| cOR7A25P_Ps  | 296 | T | C/T |
| cOR6C56P_Ps  | 304 | G | G/T |
| cOR2L17_CD   | 691 | G | A/G |
| cOR5T5_CD    | 741 | G | G/T |
| cOR2M11_CD   | 712 | T | C/T |
| cOR13N1_CD   | 633 | C | C/G |
| cOR4Z1P_Ps   | 187 | A | A/T |
| cOR5AC3_CD   | 73  | A | A/G |
| cOR13C15_CD  | 275 | C | C/T |
| cOR10A8P_Ps  | 923 | G | C/G |
| cOR3A11_CD   | 751 | G | G/T |
| cOR7C9P_Ps   | 361 | T | A/T |
| cOR11H10_CD  | 656 | T | C/T |
| cOR5BV1P_Ps  | 414 | C | C/T |
| cOR2A7P_Ps   | 231 | C | C/T |
| cOR52P1_CD   | 69  | C | C/T |
| cOR52A9P_Ps  | 850 | A | A/G |
| cOR9S8P_Ps   | 62  | C | A/C |
| cOR5B30P_Ps  | 255 | T | C/T |
| cOR71_CD     | 547 | G | A/G |
| cOR10B1P_Ps  | 194 | G | A/G |
| cOR2AG7_CD   | 325 | A | A/G |
| cOR4C41_CD   | 787 | C | C/T |
| cOR2M11_CD   | 292 | T | C/T |
| cOR2M9_CD    | 862 | G | A/G |
| cOR7C10P_Ps  | 265 | G | A/G |
| cOR6C24P_Ps  | 164 | G | G/T |
| cOR4C62P_Ps  | 662 | C | C/T |
| cOR52R3_CD   | 78  | G | A/G |
| cOR4P6_CD    | 591 | G | A/G |
| cOR10J20_CD  | 288 | T | C/T |
| cOR2D10P_Ps  | 424 | A | A/G |
| cOR10A15P_Ps | 161 | C | C/G |
| cOR52AE1_CD  | 409 | T | G/T |
| cOR7C16_CD   | 472 | T | C/T |

|              |     |   |     |
|--------------|-----|---|-----|
| cOR2B10P_Ps  | 499 | T | G/T |
| cOR2K2_CD    | 161 | G | A/G |
| cOR4H13_CD   | 609 | A | A/G |
| cOR51B7_CD   | 200 | C | C/T |
| cOR10A3_CD   | 606 | T | C/T |
| cOR6C43_CD   | 138 | T | C/T |
| cOR52A13P_Ps | 650 | A | A/G |
| cOR4X5P_Ps   | 727 | T | C/T |
| cOR5T6_CD    | 490 | C | C/T |
| cOR51A25_CD  | 927 | G | A/G |
| cOR51B4P_Ps  | 699 | A | A/C |
| cOR51D2_CD   | 146 | A | A/G |
| cOR56B9P_Ps  | 689 | T | G/T |
| cOR4C32P_Ps  | 829 | A | A/T |
| cOR6C48P_Ps  | 404 | G | A/G |
| cOR5D23_CD   | 499 | G | A/G |
| cOR7C9P_Ps   | 975 | C | C/T |
| cOR4F24_CD   | 27  | A | A/G |
| cOR52AE1_CD  | 840 | G | A/G |
| cOR6C48P_Ps  | 386 | C | C/T |
| cOR6D5_CD    | 54  | G | A/G |
| cOR6C39_CD   | 135 | C | C/T |
| cOR56B12_CD  | 665 | T | C/T |
| cOR6M7_CD    | 228 | C | A/C |
| cOR10J14_CD  | 898 | C | C/T |
| cOR2T14_CD   | 478 | G | A/G |
| cOR2D11_CD   | 342 | G | G/T |
| cOR52D4_CD   | 483 | G | A/G |
| cOR6C36_CD   | 216 | G | A/G |
| cOR6C97P_Ps  | 168 | C | A/C |
| cOR52E2_CD   | 197 | C | C/T |
| cOR10R5_CD   | 591 | A | A/G |
| cOR5B31_CD   | 708 | G | A/G |
| cOR9S12P_Ps  | 703 | G | C/G |
| cOR6C83_CD   | 120 | G | A/G |
| cOR8B14_CD   | 674 | C | C/G |
| cOR4K20_CD   | 411 | C | C/T |
| cOR4C42P_Ps  | 46  | G | A/G |
| cOR1D12P_Ps  | 624 | A | A/C |
| cOR8D4_CD    | 129 | C | C/T |
| cOR4X6_CD    | 390 | T | C/T |
| cOR1D10P_Ps  | 959 | A | A/G |
| cOR5P4_CD    | 583 | G | G/T |
| cOR4Z1P_Ps   | 702 | T | C/T |
| cOR10A8P_Ps  | 475 | C | C/G |
| cOR9S6_CD    | 591 | G | A/G |
| cOR10AJ2P_Ps | 342 | T | C/T |
| cOR13C17P_Ps | 856 | C | C/T |

|              |     |   |     |
|--------------|-----|---|-----|
| cOR5M20_CD   | 627 | A | A/G |
| cOR10Q1_CD   | 381 | C | C/T |
| cOR5L7P_Ps   | 900 | A | A/G |
| cOR4C52_CD   | 549 | T | C/T |
| cOR9Q4_CD    | 248 | A | A/C |
| cOR52X3_CD   | 492 | C | C/G |
| cOR5T5_CD    | 453 | G | A/G |
| cOR51X1P_Ps  | 410 | A | A/C |
| cOR9S3P_Ps   | 526 | C | C/T |
| cOR10A15P_Ps | 697 | G | G/T |
| cOR52AE1_CD  | 735 | T | C/T |
| cOR56A13_CD  | 225 | C | C/T |
| cOR11G1_CD   | 138 | T | C/T |
| cOR13L1P_Ps  | 553 | C | C/T |
| cOR6C28P_Ps  | 407 | A | A/G |
| cOR52A16P_Ps | 235 | G | A/G |
| cOR10A16_CD  | 487 | G | A/G |
| cOR13C25_CD  | 833 | C | C/T |
| cOR9S6_CD    | 219 | C | C/T |
| cOR52A9P_Ps  | 970 | A | A/C |
| cOR8V6_CD    | 236 | C | C/T |
| cOR4C41_CD   | 869 | T | C/T |
| cOR5AN5P_Ps  | 80  | C | C/T |
| cOR8D6_CD    | 257 | T | C/T |
| cOR6D5_CD    | 16  | C | C/T |
| cOR10R6P_Ps  | 313 | C | A/C |
| cOR5K8_CD    | 778 | G | A/G |
| cOR12F2P_Ps  | 185 | G | A/G |
| cOR51X1P_Ps  | 877 | G | A/G |
| cOR4C28P_Ps  | 675 | C | C/T |
| cOR5P5_CD    | 108 | C | C/T |
| cOR6C22P_Ps  | 361 | C | C/T |
| cOR52J5_CD   | 550 | A | A/T |
| cOR51X4_CD   | 373 | T | G/T |
| cOR13M1P_Ps  | 327 | A | A/G |
| cOR4D11_CD   | 537 | C | C/T |
| cOR51A18_CD  | 70  | C | C/T |
| cOR51X3P_Ps  | 200 | T | C/T |
| cOR1D11_CD   | 219 | T | C/T |
| cOR5M13_CD   | 400 | A | A/G |
| cOR51Z1P_Ps  | 450 | G | C/G |
| cOR9S3P_Ps   | 435 | T | C/T |
| cOR5AN5P_Ps  | 177 | C | C/T |
| cOR12E8_CD   | 405 | C | C/T |
| cOR9S16_CD   | 647 | C | C/T |
| cOR6C46P_Ps  | 165 | T | G/T |
| cOR4C54_CD   | 619 | T | C/T |
| cOR52R2P_Ps  | 136 | G | A/G |

|              |     |   |     |
|--------------|-----|---|-----|
| cOR2H9P_Ps   | 795 | G | A/G |
| cOR52W2_CD   | 413 | C | A/C |
| cOR6D5_CD    | 528 | A | A/G |
| cOR4N7_CD    | 440 | C | C/T |
| cOR5I1_CD    | 528 | T | G/T |
| cOR9S20_CD   | 456 | C | C/T |
| cOR7C55_CD   | 598 | T | C/T |
| cOR9S8P_Ps   | 668 | G | C/G |
| cOR2M11_CD   | 382 | G | A/G |
| cOR52X2_CD   | 183 | T | G/T |
| cOR6K8_CD    | 255 | G | C/G |
| cOR10J11P_Ps | 168 | T | C/T |
| cOR7C48_CD   | 85  | G | A/G |
| cOR9S6_CD    | 291 | C | C/T |
| cOR13R1_CD   | 237 | C | A/C |
| cOR4C26P_Ps  | 402 | C | C/G |
| cOR2A7P_Ps   | 288 | C | C/T |
| cOR4C54_CD   | 741 | A | A/G |
| cOR4F22P_Ps  | 970 | C | C/T |
| cOR52B8P_Ps  | 255 | C | C/T |
| cOR5AN2_CD   | 435 | G | G/T |
| cOR4K27_CD   | 610 | A | A/G |
| cOR51X1P_Ps  | 756 | T | G/T |
| cOR52A13P_Ps | 755 | A | A/G |
| cOR6M7_CD    | 242 | A | A/C |
| cOR55B4P_Ps  | 731 | G | A/G |
| cOR2M10P_Ps  | 741 | C | C/T |
| cOR1AE1_CD   | 788 | A | A/C |
| cOR2F4P_Ps   | 567 | G | G/T |
| cOR9S8P_Ps   | 517 | T | A/T |
| cOR52H5_CD   | 663 | C | C/T |
| cOR10Q3_CD   | 417 | G | A/G |
| cOR4Q6P_Ps   | 512 | C | C/T |
| cOR2G5_CD    | 532 | G | G/T |
| cOR1A4_CD    | 416 | G | A/G |
| cOR51Z1P_Ps  | 817 | C | C/T |
| cOR1L6_CD    | 306 | T | A/T |
| cOR4S7_CD    | 956 | G | G/T |
| cOR52A14_CD  | 204 | A | A/T |
| cOR4C52_CD   | 439 | C | A/C |
| cOR10AA2_CD  | 281 | C | C/T |
| cOR4C29_CD   | 763 | A | A/C |
| cOR6C77P_Ps  | 155 | A | A/T |
| cOR51I3P_Ps  | 90  | T | A/T |
| cOR5K6P_Ps   | 117 | C | C/T |
| cOR52R2P_Ps  | 551 | T | C/T |
| cOR10AD3_CD  | 651 | C | C/T |
| cOR4C52_CD   | 480 | G | A/G |

|              |     |   |     |
|--------------|-----|---|-----|
| cOR51A23_CD  | 652 | T | C/T |
| cOR10Q3_CD   | 908 | G | A/G |
| cOR6D5_CD    | 343 | G | A/G |
| cOR5BU2_CD   | 433 | A | A/G |
| cOR9S8P_Ps   | 12  | G | C/G |
| cOR56A11_CD  | 566 | A | A/G |
| cOR4C53_CD   | 722 | A | A/T |
| cOR1R4_CD    | 693 | C | C/G |
| cOR51A24_CD  | 778 | T | A/T |
| cOR12E5_CD   | 312 | T | C/T |
| cOR10A16_CD  | 327 | C | C/T |
| cOR2A7P_Ps   | 44  | A | A/C |
| cOR51B9_CD   | 256 | T | C/T |
| cOR12E5_CD   | 633 | C | C/T |
| cOR10AD3_CD  | 906 | A | A/G |
| cOR2AV1_CD   | 672 | C | C/T |
| cOR2W13P_Ps  | 874 | C | C/T |
| cOR52A13P_Ps | 633 | G | C/G |
| cOR6C86P_Ps  | 832 | A | A/G |
| cOR1D11_CD   | 525 | T | C/T |
| cOR51A16_CD  | 649 | A | A/C |
| cOR7C30_CD   | 296 | C | C/T |
| cOR7C30_CD   | 576 | C | C/T |
| cOR4Y1_CD    | 651 | C | C/T |
| cOR5P4_CD    | 780 | G | A/G |
| cOR4X5P_Ps   | 149 | T | C/T |
| cOR52R2P_Ps  | 371 | T | C/T |
| cOR6C7_CD    | 238 | C | C/T |
| cOR10H6_CD   | 423 | C | C/T |
| cOR5D14_CD   | 163 | A | A/G |
| cOR52H5_CD   | 720 | G | A/C |
| cOR7C19_CD   | 436 | A | A/G |
| cOR5AN7_CD   | 672 | G | C/G |
| cOR6K10_CD   | 270 | A | A/G |
| cOR13D1_CD   | 242 | C | C/T |
| cOR6K5_CD    | 550 | A | A/G |
| cOR9G1P_Ps   | 567 | T | G/T |
| cOR2Z5P_Ps   | 654 | C | C/G |
| cOR52J5_CD   | 171 | G | A/G |
| cOR4C57_CD   | 100 | G | C/G |
| cOR9S8P_Ps   | 452 | G | C/G |
| cOR5D21_CD   | 750 | C | C/G |
| cOR9K9P_Ps   | 439 | A | A/G |
| cOR10AA2_CD  | 729 | C | C/T |
| cOR4Y2P_Ps   | 627 | T | C/T |
| cOR4E1_CD    | 636 | G | A/G |
| cOR2D10P_Ps  | 53  | C | C/G |
| cOR7C32_CD   | 61  | G | G/T |

|             |     |   |     |
|-------------|-----|---|-----|
| cOR2M11_CD  | 163 | C | C/T |
| cOR4Q4_CD   | 793 | G | G/T |
| cOR10R4_CD  | 135 | C | C/G |
| cOR6C42_CD  | 778 | C | A/C |
| cOR7C32_CD  | 684 | G | A/G |
| cOR52J7_CD  | 587 | G | A/G |
| cOR10A16_CD | 831 | T | C/T |
| cOR8V6_CD   | 221 | C | C/T |
| cOR4K25P_Ps | 594 | G | A/G |
| cOR9G1P_Ps  | 438 | G | G/T |
| cOR6C78P_Ps | 722 | T | A/T |
| cOR3A12_CD  | 720 | C | C/T |
| cOR7C39_CD  | 333 | A | A/G |
| cOR9S16_CD  | 372 | G | C/G |
| cOR10AB2_CD | 663 | A | A/G |
| cOR52N2_CD  | 117 | C | C/T |
| cOR5H13_CD  | 905 | C | C/T |
| cOR4Q8P_Ps  | 78  | G | C/G |
| cOR6C42_CD  | 810 | A | A/G |
| cOR5T6_CD   | 219 | C | C/T |
| cOR5L4_CD   | 422 | A | A/G |
| cOR7C15_CD  | 771 | T | C/T |
| cOR10T4_CD  | 597 | T | A/T |
| cOR4P9_CD   | 245 | T | C/T |
| cOR10A8P_Ps | 338 | C | C/T |
| cOR5D21_CD  | 850 | C | C/G |
| cOR8S7_CD   | 400 | C | A/C |
| cOR52AB3_CD | 738 | C | C/T |
| cOR1D10P_Ps | 624 | A | A/T |
| cOR1J6P_Ps  | 410 | G | A/G |
| cOR9A10_CD  | 187 | G | A/G |
| cOR5M19_CD  | 387 | G | A/G |
| cOR56A13_CD | 291 | T | C/T |
| cOR6M5_CD   | 677 | G | A/G |
| cOR51E2_CD  | 650 | C | C/T |
| cOR52A15_CD | 735 | T | C/T |
| cOR10R4_CD  | 91  | A | A/G |
| cOR6C48P_Ps | 588 | C | C/T |
| cOR10A13_CD | 199 | T | C/T |
| cOR4P6_CD   | 126 | C | C/T |

---
