# Supplementary material for: Genome Analysis of the Domestic Dog (Korean Jindo) by Massively Parallel Sequencing
Source: PubMed Central journal article supplement — DNA Res. 2012 Apr 3;19(3):275–88. doi: 10.1093/dnares/dss011 (PMC3372376; doi:10.1093/dnares/dss011), 2012-04-03
Supplement: supp_dss011_dss011supp_table13.pdf [file supp_dss011_dss011supp_table13.pdf]

Supplementary Table 13.  
Non-synonymous,  
homozygous SNP-containing  
olfactory receptor genes

| Gene name          |
|--------------------|
| JinDO_cOR10A16_CD  |
| Boxer_cOR10A16_CD  |
| JinDO_cOR10AD2_CD  |
| Boxer_cOR10AD2_CD  |
| JinDO_cOR10H15P_Ps |
| Boxer_cOR10H15P_Ps |
| JinDO_cOR10H18_CD  |
| Boxer_cOR10H18_CD  |
| JinDO_cOR10H20_CD  |
| Boxer_cOR10H20_CD  |
| JinDO_cOR10H7_CD   |
| Boxer_cOR10H7_CD   |
| JinDO_cOR10J11P_Ps |
| Boxer_cOR10J11P_Ps |
| JinDO_cOR10J14_CD  |
| Boxer_cOR10J14_CD  |
| JinDO_cOR10J19_CD  |
| Boxer_cOR10J19_CD  |
| JinDO_cOR10J23_CD  |
| Boxer_cOR10J23_CD  |
| JinDO_cOR10J24P_Ps |
| Boxer_cOR10J24P_Ps |
| JinDO_cOR10J7P_Ps  |
| Boxer_cOR10J7P_Ps  |
| JinDO_cOR10Q5_CD   |
| Boxer_cOR10Q5_CD   |
| JinDO_cOR10V6_CD   |
| Boxer_cOR10V6_CD   |
| JinDO_cOR11G6P_Ps  |
| Boxer_cOR11G6P_Ps  |
| JinDO_cOR11H11_CD  |
| Boxer_cOR11H11_CD  |
| JinDO_cOR11K3P_Ps  |
| Boxer_cOR11K3P_Ps  |
| JinDO_cOR12E1_CD   |
| Boxer_cOR12E1_CD   |
| JinDO_cOR12E2_CD   |
| Boxer_cOR12E2_CD   |
| JinDO_cOR12E4_CD   |
| Boxer_cOR12E4_CD   |
| JinDO_cOR12E8_CD   |
| Boxer_cOR12E8_CD   |
| JinDO_cOR13AM1P_Ps |

Boxer\_cOR13AM1P\_Ps  
JinDO\_cOR13C17P\_Ps  
Boxer\_cOR13C17P\_Ps  
JinDO\_cOR13C20P\_Ps  
Boxer\_cOR13C20P\_Ps  
JinDO\_cOR13M1P\_Ps  
Boxer\_cOR13M1P\_Ps  
JinDO\_cOR13M2\_CD  
Boxer\_cOR13M2\_CD  
JinDO\_cOR13M5P\_Ps  
Boxer\_cOR13M5P\_Ps  
JinDO\_cOR13N4\_CD  
Boxer\_cOR13N4\_CD  
JinDO\_cOR1A4\_CD  
Boxer\_cOR1A4\_CD  
JinDO\_cOR1AO1P\_Ps  
Boxer\_cOR1AO1P\_Ps  
JinDO\_cOR1D10P\_Ps  
Boxer\_cOR1D10P\_Ps  
JinDO\_cOR1D11\_CD  
Boxer\_cOR1D11\_CD  
JinDO\_cOR1D12P\_Ps  
Boxer\_cOR1D12P\_Ps  
JinDO\_cOR1E12\_CD  
Boxer\_cOR1E12\_CD  
JinDO\_cOR1M1\_CD  
Boxer\_cOR1M1\_CD  
JinDO\_cOR1S3P\_Ps  
Boxer\_cOR1S3P\_Ps  
JinDO\_cOR2A32\_CD  
Boxer\_cOR2A32\_CD  
JinDO\_cOR2A35\_CD  
Boxer\_cOR2A35\_CD  
JinDO\_cOR2A37\_CD  
Boxer\_cOR2A37\_CD  
JinDO\_cOR2A39\_CD  
Boxer\_cOR2A39\_CD  
JinDO\_cOR2AG1\_CD  
Boxer\_cOR2AG1\_CD  
JinDO\_cOR2AG8P\_Ps  
Boxer\_cOR2AG8P\_Ps  
JinDO\_cOR2AG9\_CD  
Boxer\_cOR2AG9\_CD  
JinDO\_cOR2AK3\_CD  
Boxer\_cOR2AK3\_CD  
JinDO\_cOR2AT5P\_Ps  
Boxer\_cOR2AT5P\_Ps  
JinDO\_cOR2AT7\_CD

Boxer\_cOR2AT7\_CD  
JinDO\_cOR2B2\_CD  
Boxer\_cOR2B2\_CD  
JinDO\_cOR2D2P\_Ps  
Boxer\_cOR2D2P\_Ps  
JinDO\_cOR2D8\_CD  
Boxer\_cOR2D8\_CD  
JinDO\_cOR2F4P\_Ps  
Boxer\_cOR2F4P\_Ps  
JinDO\_cOR2G4P\_Ps  
Boxer\_cOR2G4P\_Ps  
JinDO\_cOR2T18\_CD  
Boxer\_cOR2T18\_CD  
JinDO\_cOR2T24\_CD  
Boxer\_cOR2T24\_CD  
JinDO\_cOR2W13P\_Ps  
Boxer\_cOR2W13P\_Ps  
JinDO\_cOR3A11\_CD  
Boxer\_cOR3A11\_CD  
JinDO\_cOR3A9\_CD  
Boxer\_cOR3A9\_CD  
JinDO\_cOR4A26\_CD  
Boxer\_cOR4A26\_CD  
JinDO\_cOR4A33\_CD  
Boxer\_cOR4A33\_CD  
JinDO\_cOR4A39\_CD  
Boxer\_cOR4A39\_CD  
JinDO\_cOR4B4\_CD  
Boxer\_cOR4B4\_CD  
JinDO\_cOR4C22P\_Ps  
Boxer\_cOR4C22P\_Ps  
JinDO\_cOR4C26P\_Ps  
Boxer\_cOR4C26P\_Ps  
JinDO\_cOR4C29\_CD  
Boxer\_cOR4C29\_CD  
JinDO\_cOR4C30P\_Ps  
Boxer\_cOR4C30P\_Ps  
JinDO\_cOR4C40\_CD  
Boxer\_cOR4C40\_CD  
JinDO\_cOR4C42P\_Ps  
Boxer\_cOR4C42P\_Ps  
JinDO\_cOR4C54\_CD  
Boxer\_cOR4C54\_CD  
JinDO\_cOR4C59\_CD  
Boxer\_cOR4C59\_CD  
JinDO\_cOR4C63P\_Ps  
Boxer\_cOR4C63P\_Ps  
JinDO\_cOR4C65P\_Ps

Boxer\_cOR4C65P\_Ps  
JinDO\_cOR4C66P\_Ps  
Boxer\_cOR4C66P\_Ps  
JinDO\_cOR4D13\_CD  
Boxer\_cOR4D13\_CD  
JinDO\_cOR4F30P\_Ps  
Boxer\_cOR4F30P\_Ps  
JinDO\_cOR4F31P\_Ps  
Boxer\_cOR4F31P\_Ps  
JinDO\_cOR4K19P\_Ps  
Boxer\_cOR4K19P\_Ps  
JinDO\_cOR4N6\_CD  
Boxer\_cOR4N6\_CD  
JinDO\_cOR4P6\_CD  
Boxer\_cOR4P6\_CD  
JinDO\_cOR4Q4\_CD  
Boxer\_cOR4Q4\_CD  
JinDO\_cOR4Q6P\_Ps  
Boxer\_cOR4Q6P\_Ps  
JinDO\_cOR4Q7\_CD  
Boxer\_cOR4Q7\_CD  
JinDO\_cOR4Q8P\_Ps  
Boxer\_cOR4Q8P\_Ps  
JinDO\_cOR4V2P\_Ps  
Boxer\_cOR4V2P\_Ps  
JinDO\_cOR4V4\_CD  
Boxer\_cOR4V4\_CD  
JinDO\_cOR4X3P\_Ps  
Boxer\_cOR4X3P\_Ps  
JinDO\_cOR4X7\_CD  
Boxer\_cOR4X7\_CD  
JinDO\_cOR4Y3\_CD  
Boxer\_cOR4Y3\_CD  
JinDO\_cOR4Y5\_CD  
Boxer\_cOR4Y5\_CD  
JinDO\_cOR4Z4P\_Ps  
Boxer\_cOR4Z4P\_Ps  
JinDO\_cOR51A14P\_Ps  
Boxer\_cOR51A14P\_Ps  
JinDO\_cOR51A19\_CD  
Boxer\_cOR51A19\_CD  
JinDO\_cOR51A23\_CD  
Boxer\_cOR51A23\_CD  
JinDO\_cOR51B11P\_Ps  
Boxer\_cOR51B11P\_Ps  
JinDO\_cOR51B4P\_Ps  
Boxer\_cOR51B4P\_Ps  
JinDO\_cOR51G1\_CD

Boxer\_cOR51G1\_CD  
JinDO\_cOR51H4\_CD  
Boxer\_cOR51H4\_CD  
JinDO\_cOR51H5\_CD  
Boxer\_cOR51H5\_CD  
JinDO\_cOR51I1\_CD  
Boxer\_cOR51I1\_CD  
JinDO\_cOR51K1\_CD  
Boxer\_cOR51K1\_CD  
JinDO\_cOR51L2P\_Ps  
Boxer\_cOR51L2P\_Ps  
JinDO\_cOR51Q1\_CD  
Boxer\_cOR51Q1\_CD  
JinDO\_cOR51Q2P\_Ps  
Boxer\_cOR51Q2P\_Ps  
JinDO\_cOR52A13P\_Ps  
Boxer\_cOR52A13P\_Ps  
JinDO\_cOR52AB2\_CD  
Boxer\_cOR52AB2\_CD  
JinDO\_cOR52AB5P\_Ps  
Boxer\_cOR52AB5P\_Ps  
JinDO\_cOR52AC1\_CD  
Boxer\_cOR52AC1\_CD  
JinDO\_cOR52AD1\_CD  
Boxer\_cOR52AD1\_CD  
JinDO\_cOR52E2\_CD  
Boxer\_cOR52E2\_CD  
JinDO\_cOR52H2\_CD  
Boxer\_cOR52H2\_CD  
JinDO\_cOR52H3\_CD  
Boxer\_cOR52H3\_CD  
JinDO\_cOR52H8P\_Ps  
Boxer\_cOR52H8P\_Ps  
JinDO\_cOR52J6\_CD  
Boxer\_cOR52J6\_CD  
JinDO\_cOR52M5\_CD  
Boxer\_cOR52M5\_CD  
JinDO\_cOR52N6\_CD  
Boxer\_cOR52N6\_CD  
JinDO\_cOR52R2P\_Ps  
Boxer\_cOR52R2P\_Ps  
JinDO\_cOR52R3\_CD  
Boxer\_cOR52R3\_CD  
JinDO\_cOR52S3P\_Ps  
Boxer\_cOR52S3P\_Ps  
JinDO\_cOR52S7P\_Ps  
Boxer\_cOR52S7P\_Ps  
JinDO\_cOR52U2\_CD

Boxer\_cOR52U2\_CD  
JinDO\_cOR52U3\_CD  
Boxer\_cOR52U3\_CD  
JinDO\_cOR52X2\_CD  
Boxer\_cOR52X2\_CD  
JinDO\_cOR52Z2\_CD  
Boxer\_cOR52Z2\_CD  
JinDO\_cOR55B4P\_Ps  
Boxer\_cOR55B4P\_Ps  
JinDO\_cOR56A12P\_Ps  
Boxer\_cOR56A12P\_Ps  
JinDO\_cOR56A15\_CD  
Boxer\_cOR56A15\_CD  
JinDO\_cOR56A25\_CD  
Boxer\_cOR56A25\_CD  
JinDO\_cOR56A8\_CD  
Boxer\_cOR56A8\_CD  
JinDO\_cOR5AL1\_CD  
Boxer\_cOR5AL1\_CD  
JinDO\_cOR5AN3P\_Ps  
Boxer\_cOR5AN3P\_Ps  
JinDO\_cOR5AN4\_CD  
Boxer\_cOR5AN4\_CD  
JinDO\_cOR5AN5P\_Ps  
Boxer\_cOR5AN5P\_Ps  
JinDO\_cOR5AN7\_CD  
Boxer\_cOR5AN7\_CD  
JinDO\_cOR5AP3\_CD  
Boxer\_cOR5AP3\_CD  
JinDO\_cOR5AP4\_CD  
Boxer\_cOR5AP4\_CD  
JinDO\_cOR5AQ2\_CD  
Boxer\_cOR5AQ2\_CD  
JinDO\_cOR5AR1\_CD  
Boxer\_cOR5AR1\_CD  
JinDO\_cOR5B25\_CD  
Boxer\_cOR5B25\_CD  
JinDO\_cOR5B30P\_Ps  
Boxer\_cOR5B30P\_Ps  
JinDO\_cOR5B33P\_Ps  
Boxer\_cOR5B33P\_Ps  
JinDO\_cOR5BC2P\_Ps  
Boxer\_cOR5BC2P\_Ps  
JinDO\_cOR5D14\_CD  
Boxer\_cOR5D14\_CD  
JinDO\_cOR5D21\_CD  
Boxer\_cOR5D21\_CD  
JinDO\_cOR5D23\_CD

Boxer\_cOR5D23\_CD  
JinDO\_cOR5D24P\_Ps  
Boxer\_cOR5D24P\_Ps  
JinDO\_cOR5F3\_CD  
Boxer\_cOR5F3\_CD  
JinDO\_cOR5H16\_CD  
Boxer\_cOR5H16\_CD  
JinDO\_cOR5H9\_CD  
Boxer\_cOR5H9\_CD  
JinDO\_cOR5K7\_CD  
Boxer\_cOR5K7\_CD  
JinDO\_cOR5M12\_CD  
Boxer\_cOR5M12\_CD  
JinDO\_cOR5M18\_CD  
Boxer\_cOR5M18\_CD  
JinDO\_cOR5M24P\_Ps  
Boxer\_cOR5M24P\_Ps  
JinDO\_cOR5T4P\_Ps  
Boxer\_cOR5T4P\_Ps  
JinDO\_cOR5T5\_CD  
Boxer\_cOR5T5\_CD  
JinDO\_cOR5T9P\_Ps  
Boxer\_cOR5T9P\_Ps  
JinDO\_cOR6AB1P\_Ps  
Boxer\_cOR6AB1P\_Ps  
JinDO\_cOR6AE1\_CD  
Boxer\_cOR6AE1\_CD  
JinDO\_cOR6B6\_CD  
Boxer\_cOR6B6\_CD  
JinDO\_cOR6B7\_CD  
Boxer\_cOR6B7\_CD  
JinDO\_cOR6B8\_CD  
Boxer\_cOR6B8\_CD  
JinDO\_cOR6C11\_CD  
Boxer\_cOR6C11\_CD  
JinDO\_cOR6C19P\_Ps  
Boxer\_cOR6C19P\_Ps  
JinDO\_cOR6C22P\_Ps  
Boxer\_cOR6C22P\_Ps  
JinDO\_cOR6C25P\_Ps  
Boxer\_cOR6C25P\_Ps  
JinDO\_cOR6C30\_CD  
Boxer\_cOR6C30\_CD  
JinDO\_cOR6C61P\_Ps  
Boxer\_cOR6C61P\_Ps  
JinDO\_cOR6C62\_CD  
Boxer\_cOR6C62\_CD  
JinDO\_cOR6C79P\_Ps

Boxer\_cOR6C79P\_Ps  
JinDO\_cOR6C84P\_Ps  
Boxer\_cOR6C84P\_Ps  
JinDO\_cOR6C87P\_Ps  
Boxer\_cOR6C87P\_Ps  
JinDO\_cOR6C94P\_Ps  
Boxer\_cOR6C94P\_Ps  
JinDO\_cOR6D4P\_Ps  
Boxer\_cOR6D4P\_Ps  
JinDO\_cOR6F2\_CD  
Boxer\_cOR6F2\_CD  
JinDO\_cOR6K10\_CD  
Boxer\_cOR6K10\_CD  
JinDO\_cOR6K5\_CD  
Boxer\_cOR6K5\_CD  
JinDO\_cOR6M4P\_Ps  
Boxer\_cOR6M4P\_Ps  
JinDO\_cOR6M8\_CD  
Boxer\_cOR6M8\_CD  
JinDO\_cOR6N3\_CD  
Boxer\_cOR6N3\_CD  
JinDO\_cOR6N4\_CD  
Boxer\_cOR6N4\_CD  
JinDO\_cOR6U3\_CD  
Boxer\_cOR6U3\_CD  
JinDO\_cOR6Y3\_CD  
Boxer\_cOR6Y3\_CD  
JinDO\_cOR6Z3\_CD  
Boxer\_cOR6Z3\_CD  
JinDO\_cOR7A22P\_Ps  
Boxer\_cOR7A22P\_Ps  
JinDO\_cOR7C10P\_Ps  
Boxer\_cOR7C10P\_Ps  
JinDO\_cOR7C15\_CD  
Boxer\_cOR7C15\_CD  
JinDO\_cOR7C27\_CD  
Boxer\_cOR7C27\_CD  
JinDO\_cOR7C34\_CD  
Boxer\_cOR7C34\_CD  
JinDO\_cOR7C36\_CD  
Boxer\_cOR7C36\_CD  
JinDO\_cOR7C41P\_Ps  
Boxer\_cOR7C41P\_Ps  
JinDO\_cOR7C42P\_Ps  
Boxer\_cOR7C42P\_Ps  
JinDO\_cOR7C45\_CD  
Boxer\_cOR7C45\_CD  
JinDO\_cOR7C48\_CD



Boxer\_cOR7C48\_CD  
JinDO\_cOR7C54P\_Ps  
Boxer\_cOR7C54P\_Ps  
JinDO\_cOR7C5P\_Ps  
Boxer\_cOR7C5P\_Ps  
JinDO\_cOR7C7\_CD  
Boxer\_cOR7C7\_CD  
JinDO\_cOR7C8P\_Ps  
Boxer\_cOR7C8P\_Ps  
JinDO\_cOR7C9P\_Ps  
Boxer\_cOR7C9P\_Ps  
JinDO\_cOR7D4\_CD  
Boxer\_cOR7D4\_CD  
JinDO\_cOR7D5\_CD  
Boxer\_cOR7D5\_CD  
JinDO\_cOR7E152\_CD  
Boxer\_cOR7E152\_CD  
JinDO\_cOR7E153\_CD  
Boxer\_cOR7E153\_CD  
JinDO\_cOR7G10\_CD  
Boxer\_cOR7G10\_CD  
JinDO\_cOR7G12\_CD  
Boxer\_cOR7G12\_CD  
JinDO\_cOR7G14\_CD  
Boxer\_cOR7G14\_CD  
JinDO\_cOR7G5\_CD  
Boxer\_cOR7G5\_CD  
JinDO\_cOR7G6\_CD  
Boxer\_cOR7G6\_CD  
JinDO\_cOR7G8\_CD  
Boxer\_cOR7G8\_CD  
JinDO\_cOR7G9\_CD  
Boxer\_cOR7G9\_CD  
JinDO\_cOR7H3\_CD  
Boxer\_cOR7H3\_CD  
JinDO\_cOR8B1\_CD  
Boxer\_cOR8B1\_CD  
JinDO\_cOR8B15P\_Ps  
Boxer\_cOR8B15P\_Ps  
JinDO\_cOR8B22P\_Ps  
Boxer\_cOR8B22P\_Ps  
JinDO\_cOR8C7\_CD  
Boxer\_cOR8C7\_CD  
JinDO\_cOR8D7\_CD  
Boxer\_cOR8D7\_CD  
JinDO\_cOR8H4\_CD  
Boxer\_cOR8H4\_CD  
JinDO\_cOR8I3\_CD

Boxer\_cOR8I3\_CD  
JinDO\_cOR8J4P\_Ps  
Boxer\_cOR8J4P\_Ps  
JinDO\_cOR8K1\_CD  
Boxer\_cOR8K1\_CD  
JinDO\_cOR8K7\_CD  
Boxer\_cOR8K7\_CD  
JinDO\_cOR8S11P\_Ps  
Boxer\_cOR8S11P\_Ps  
JinDO\_cOR8S12\_CD  
Boxer\_cOR8S12\_CD  
JinDO\_cOR8S14\_CD  
Boxer\_cOR8S14\_CD  
JinDO\_cOR8S17\_CD  
Boxer\_cOR8S17\_CD  
JinDO\_cOR8S20\_CD  
Boxer\_cOR8S20\_CD  
JinDO\_cOR8S9\_CD  
Boxer\_cOR8S9\_CD  
JinDO\_cOR8V11\_CD  
Boxer\_cOR8V11\_CD  
JinDO\_cOR8V4\_CD  
Boxer\_cOR8V4\_CD  
JinDO\_cOR8V6\_CD  
Boxer\_cOR8V6\_CD  
JinDO\_cOR9A7\_CD  
Boxer\_cOR9A7\_CD  
JinDO\_cOR9G1P\_Ps  
Boxer\_cOR9G1P\_Ps  
JinDO\_cOR9I4P\_Ps  
Boxer\_cOR9I4P\_Ps  
JinDO\_cOR9S10\_CD  
Boxer\_cOR9S10\_CD  
JinDO\_cOR9S21\_CD  
Boxer\_cOR9S21\_CD  
JinDO\_cOR9S22P\_Ps  
Boxer\_cOR9S22P\_Ps  
JinDO\_cOR9S26P\_Ps  
Boxer\_cOR9S26P\_Ps  
JinDO\_cOR9S3P\_Ps  
Boxer\_cOR9S3P\_Ps  
JinDO\_cOR9S5\_CD  
Boxer\_cOR9S5\_CD  
JinDO\_cOR9S8P\_Ps  
Boxer\_cOR9S8P\_Ps

---
